# Supplementary material for: A computational model for classification of BRCA2 variants using mouse embryonic stem cell-based functional assays
Source: PubMed Central journal article supplement (PMC7722754; doi:10.1038/s41525-020-00158-5), 2020-12-08
Supplement: 41525_2020_158_MOESM1_ESM.pdf [file 41525_2020_158_MOESM1_ESM.pdf]

**Supplementary Information:**

**Supplementary Figures 1-7**

**Supplementary Tables 1-4**

**Supplementary Methods**

## SUPPLEMENTARY FIGURES

**Supplementary Figure 1: Representative Southern blots showing genotyping of HAT resistant colonies to identify *Brca2*<sup>KO/KO</sup> mES cells.** Top panel shows the scheme of *Brca2* alleles for Southern hybridization. DNA was digested with *EcoRV*. Probe used is marked with thick line. Lower panel shows two representative Southern blots showing either full rescue or partial rescue of cell lethality as marked by loss of the conditional allele. Each lane on the Southern blot represents individual HAT resistant clone obtained after CRE mediated deletion of the conditional allele (CKO). First lane, marked as C, on both blots represents the parental PL2F7 mESC DNA containing both Conditional (CKO) and knockout (KO) allele. The asterisks mark the lanes with DNA from rescued *Brca2*<sup>KO/KO</sup> clones in which the top band (CKO allele) is deleted and only the lower band (KO allele) is retained.

# Supplementary Figure 1

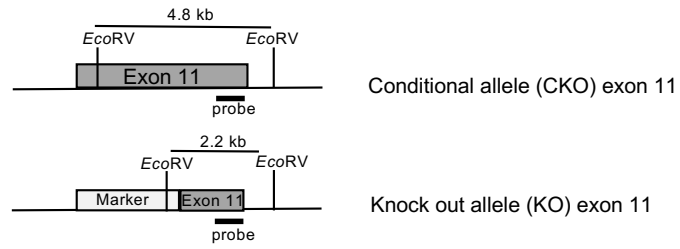

## Full rescue

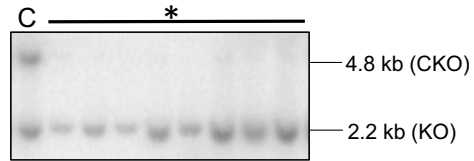

## Partial rescue

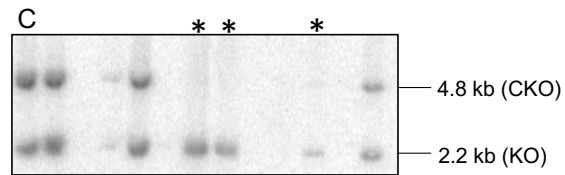

**Supplementary Figure 2: *BRCA2* expression of variants that fail to complement**

***Brca2*<sup>KO/KO</sup> mES cell viability.** (a) Western blot showing the expression of BRCA2 in two independent clones (marked as 1 and 2) containing the indicated variant cloned in BAC. GAPDH or Vinculin was used as loading control and marked as “control”. WT represents the clone expressing BRCA2 WT BAC. (b) RT-PCR analysis detects a 627 bp fragment (ex11-14) to validate mRNA expression of the clones expressing nonsense variants using the primers from exon 11 and 14 (5'-TGGTTTTGTCAAATTCAAGAATTGG-3' and 5'-GTGAAAGTTACAGCTACTGCTTGATTGG-3'). Lower band (531bp) represent BRCA2 splice variant lacking exon 12 ( $\Delta$ ex12). Two independent clones are marked as 1 and 2 were further analyzed. Left lane marks the DNA size marker (1kb Plus Ladder, Life Technologies) and marked as 'M'.



# Supplementary Figure 2

a

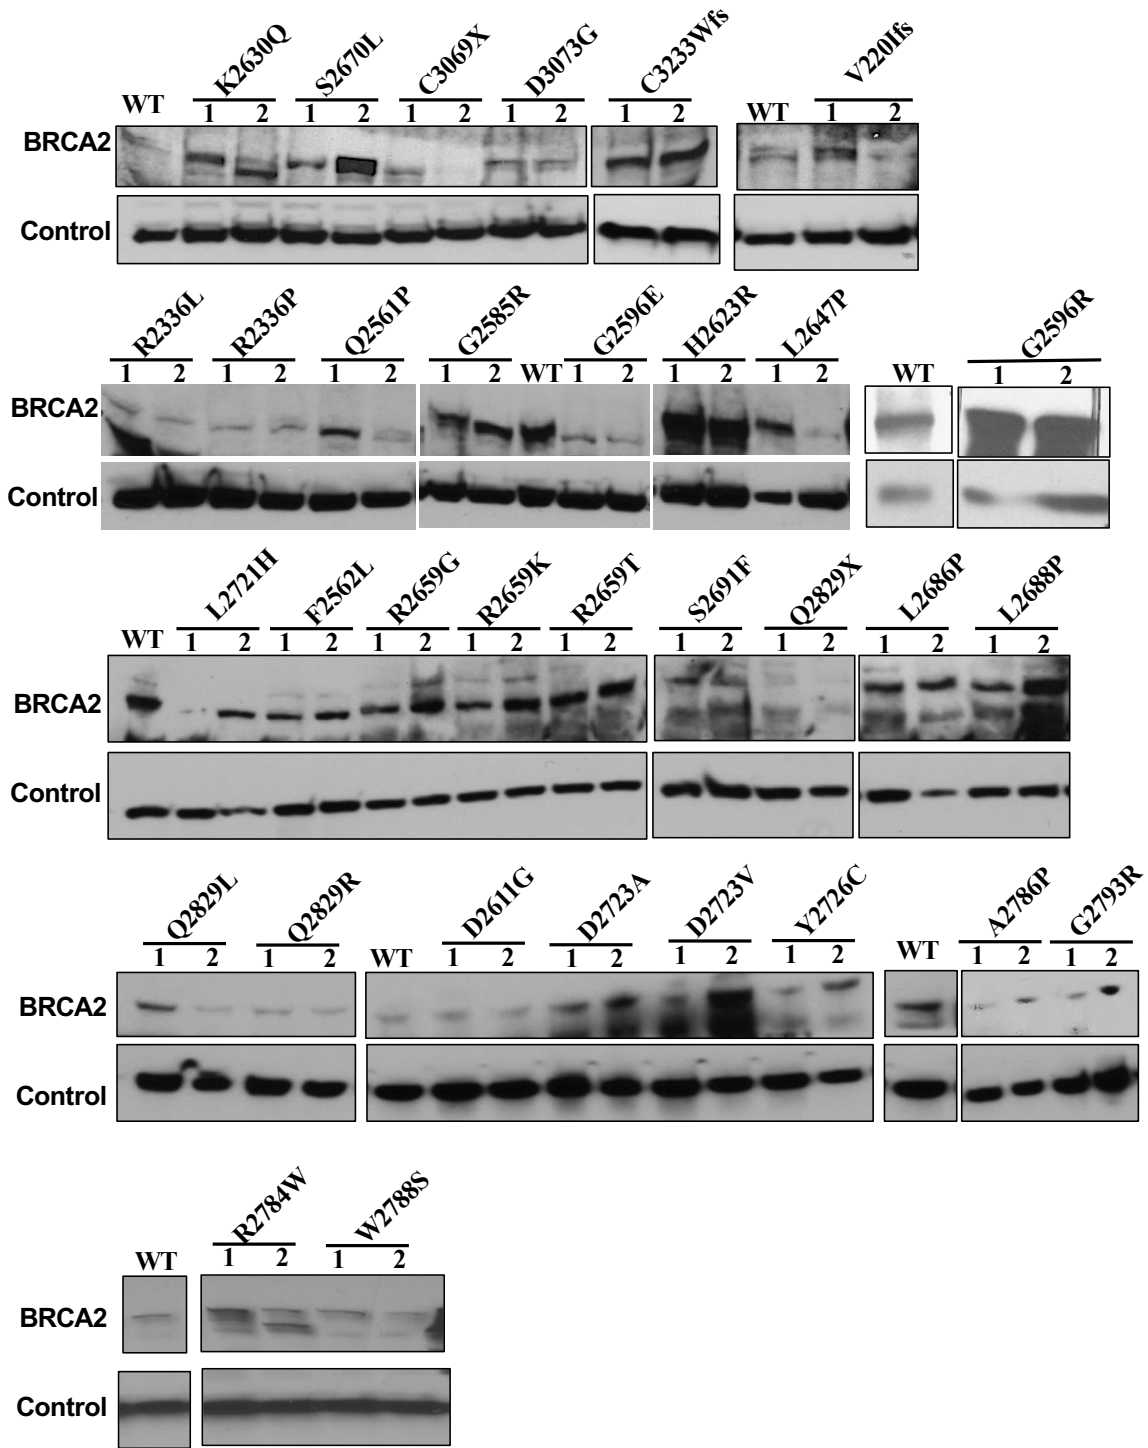

b

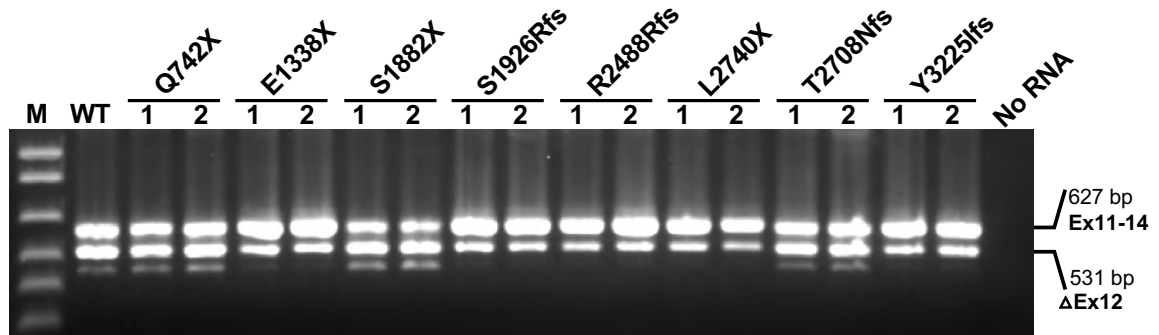

**Supplementary Figure 3: Representative graphs showing response of mouse ES cells expressing BRCA2 variants to DNA damaging agents.** Survival of *Brca2*<sup>KO/KO</sup> mouse ES cells expressing BRCA2 variants (a. P168T, b. R2488S, c. V220Ifs, d. C3233Wfs, e.R2336L, f. V2728I, g. W2788S) as determined by XTT-based assay 72 hrs. after treatment with indicated doses of camptothecin, Mitomycin C (MMC), cisplatin, methyl methanesulphonate (MMS), PARP inhibitor (olaparib), and  $\gamma$ -irradiation (IR). *Brca2*<sup>KO/KO</sup> mouse ES cells expressing WT BRCA2 was used as control. Two independently generated mES cells clones expressing each variant were used.

# Supplementary Figure 3

## a P168T

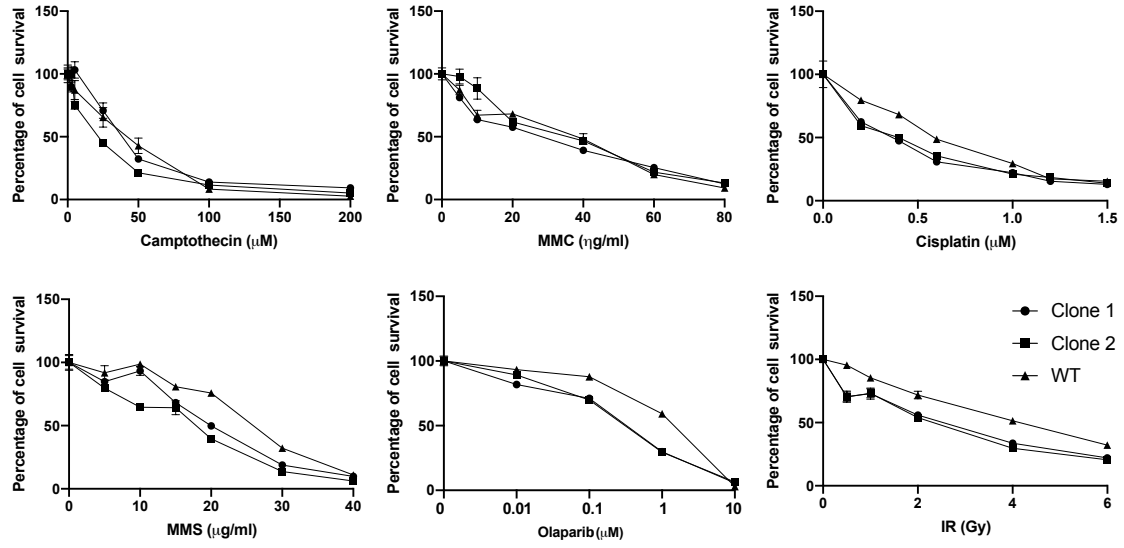

## b R248S

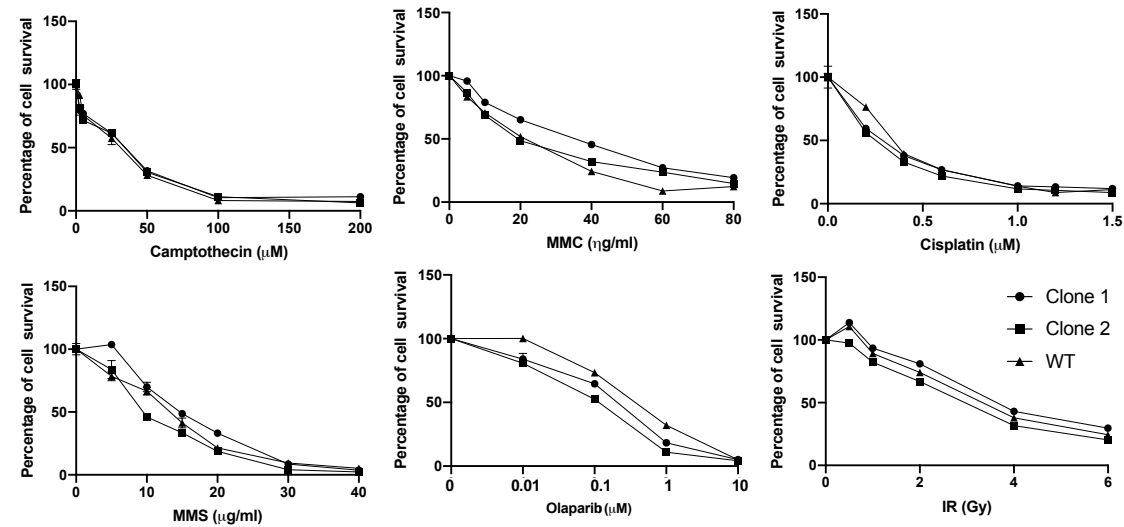

## c V220Ifs

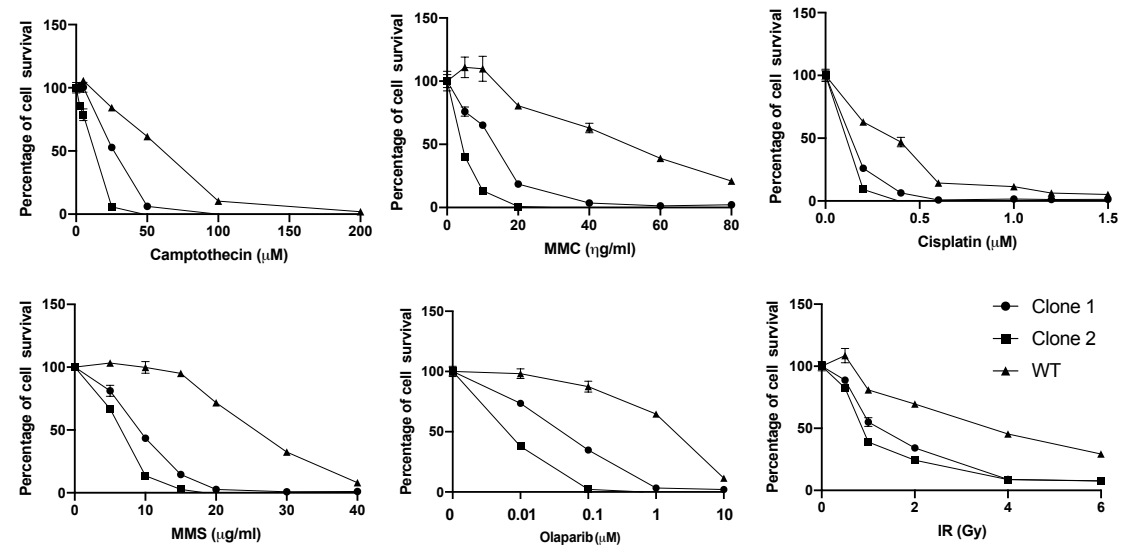

### d C3233Wfs

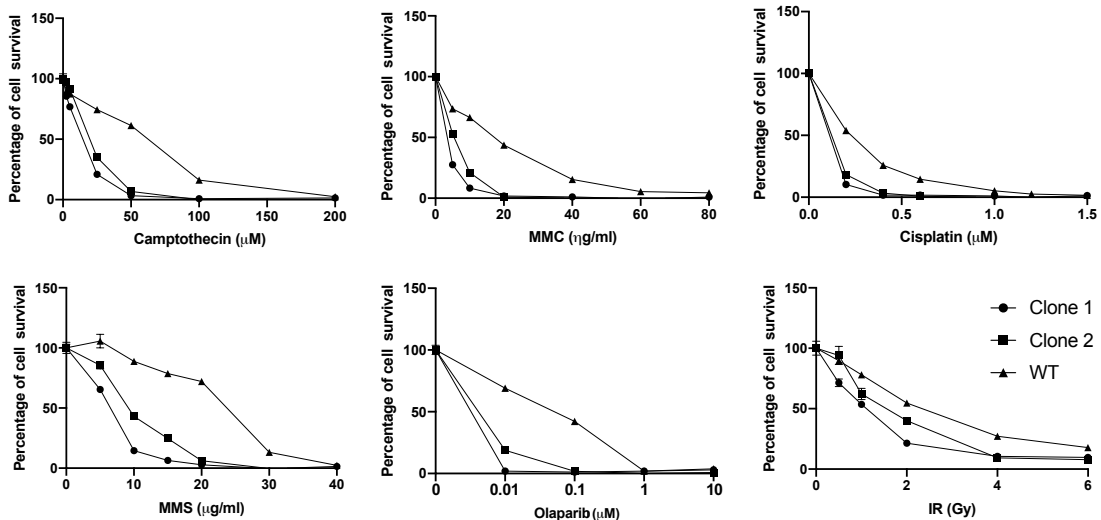

### e R2336L

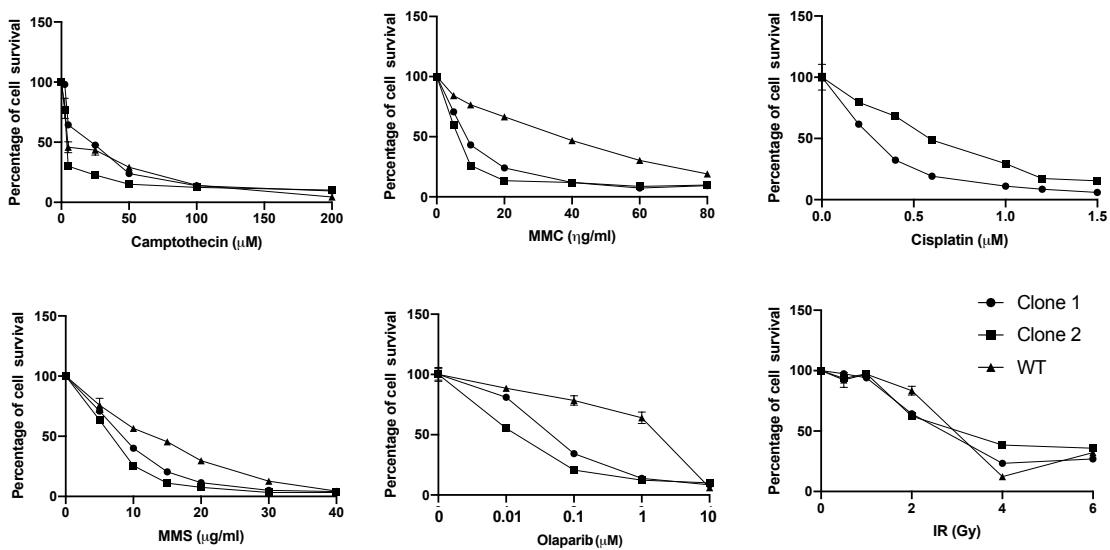

### f V2728I

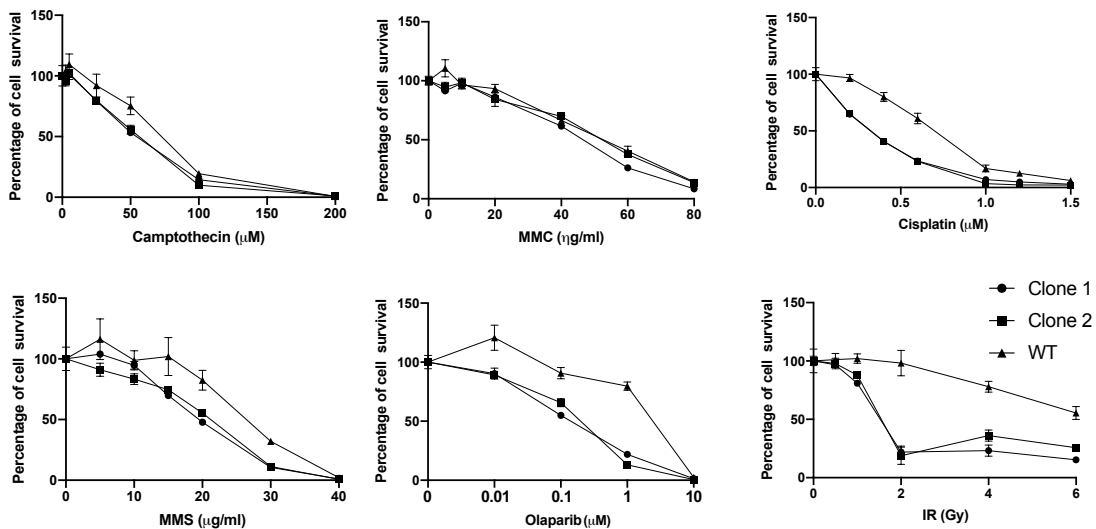

# g W2788S

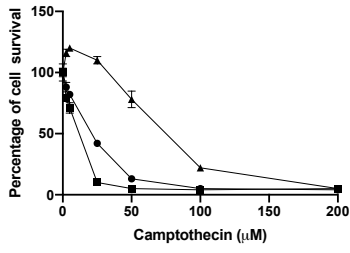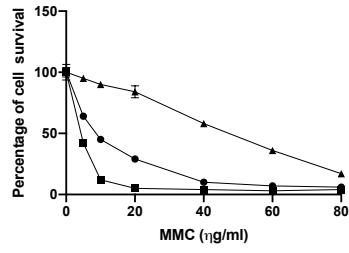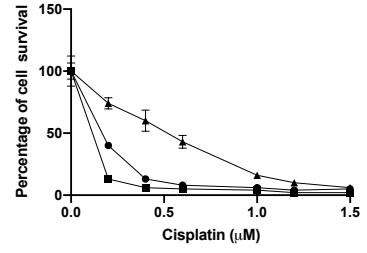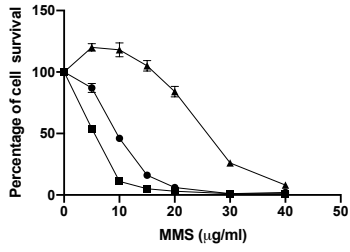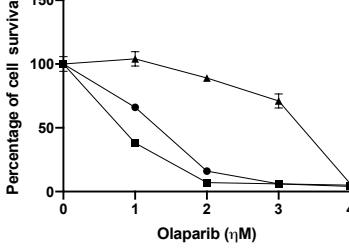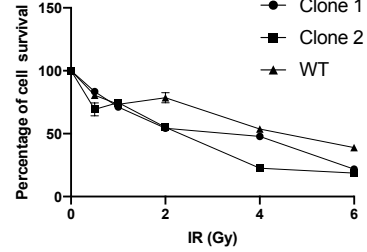

- Clone 1
- Clone 2
- ▲ WT

**Supplementary Figure 4: Alternative splicing analysis of variants.** Alternative splicing of variants that potentially affect splicing machinery. Two independent clones were analyzed for each variant and they are marked as 1 and 2. WT BRCA2 expressing cells were used as control. The sizes of the various transcripts are marked on right side. The primers used are listed in Supplementary Table 4.

## Supplementary Figure 4

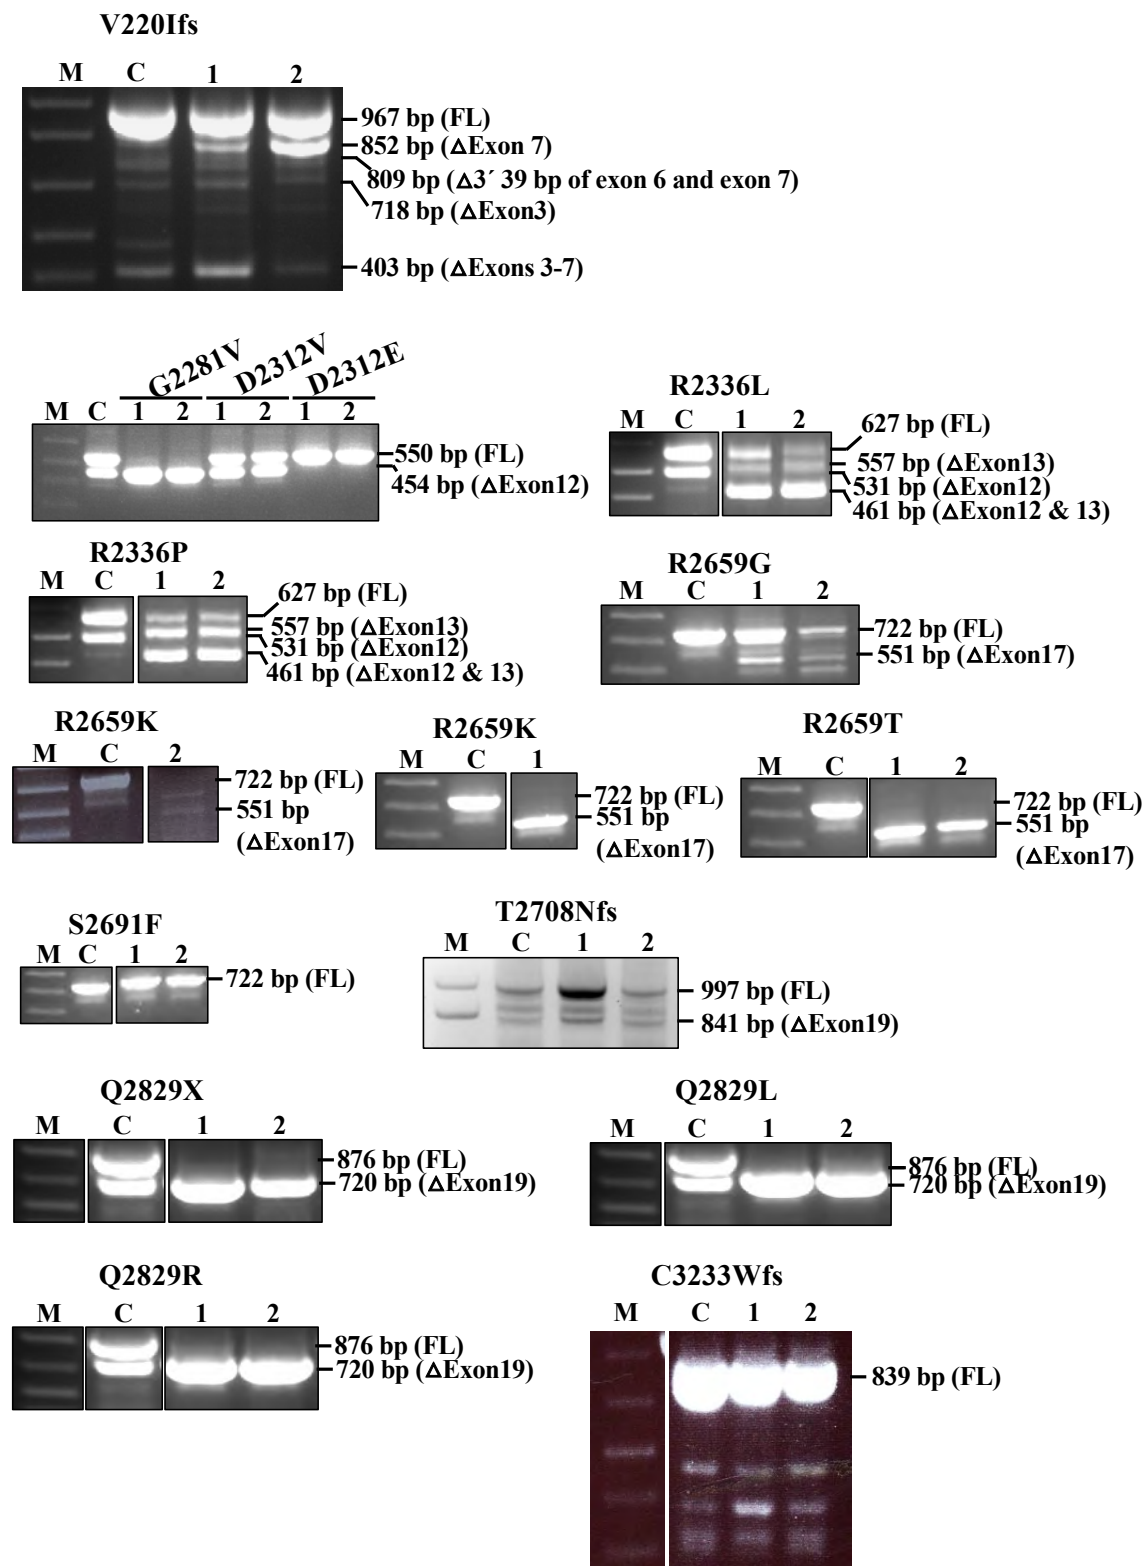

**Supplementary Figure 5: Chromatogram of relevant splice variants with skipped exons.**

Sequence analysis of relevant alternatively spliced *BRCA2* transcripts from Fig S4, that may result in early protein truncation or internal deletion of some residues. Exons numbers are marked on the top of the chromatogram and transcripts with alternative splicing are labeled on the left.



Supplementary Figure 5

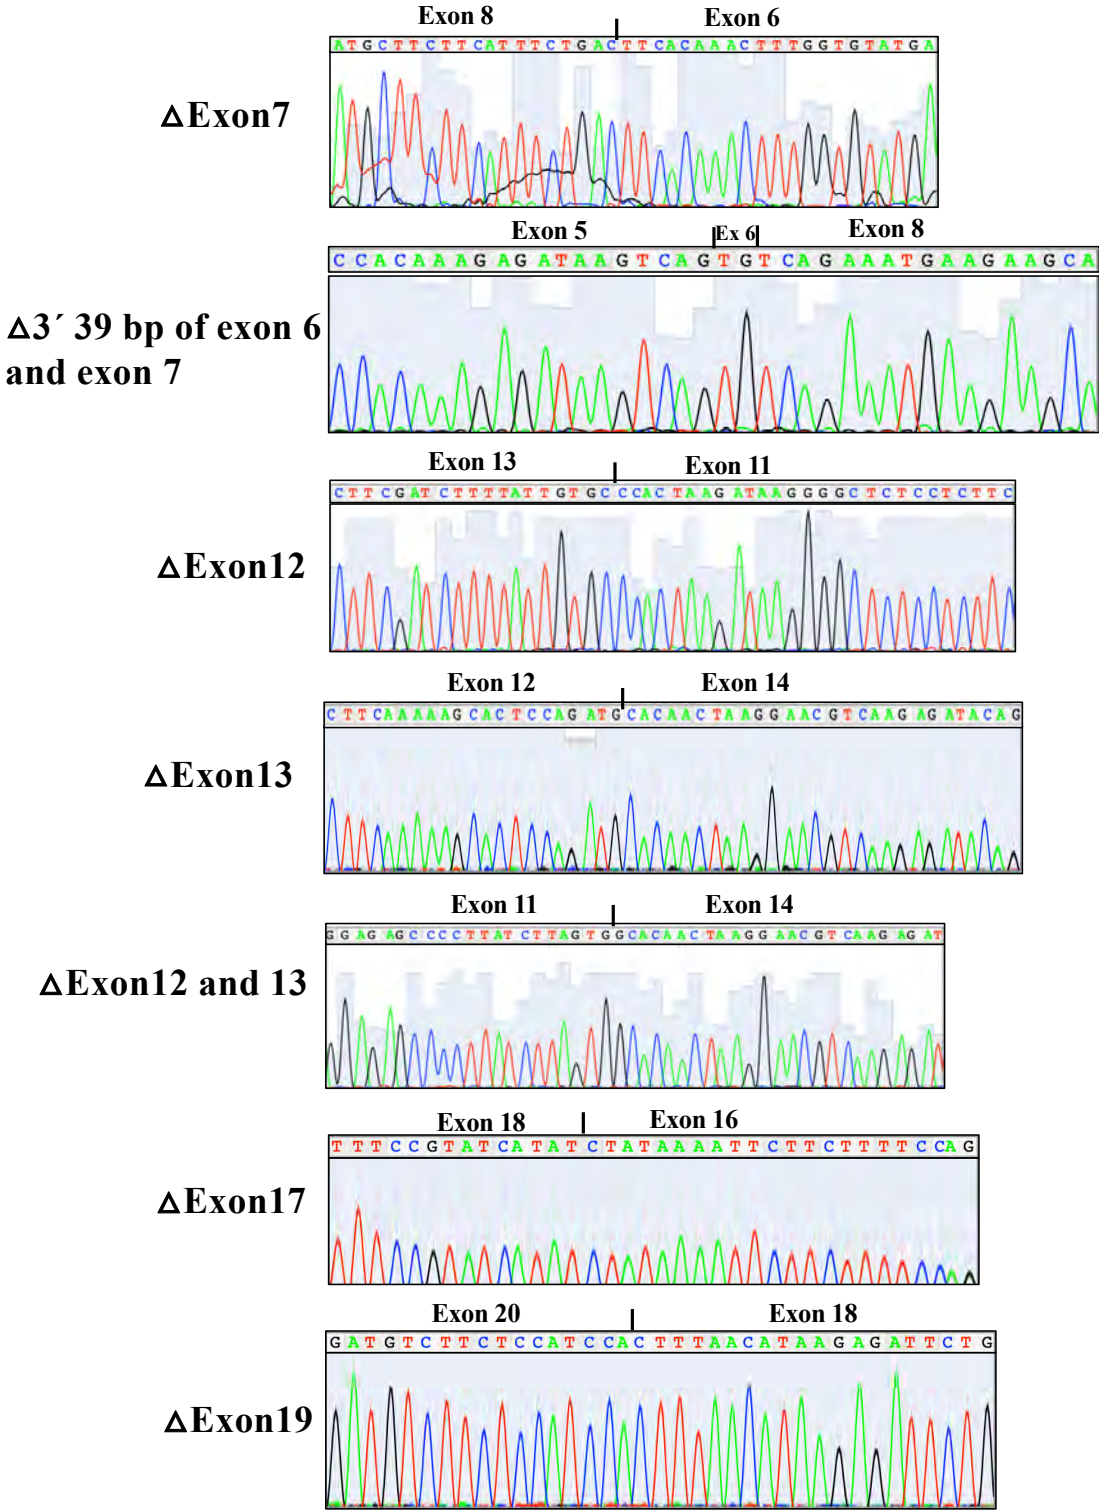

**Supplementary Figure 6: Effect of C3233Wfs mutation on BRCA2 functions.** (a) Ionizing radiation (IR) induced RAD51 foci formation in *Brca2<sup>KO/KO</sup>* mES cells expressing either WT or C3233Wfs variant. Representative images are shown.  $\gamma$ -H2AX was used as control for DNA damage. (b) Quantification of RAD51 foci. 150-170 nuclei were counted for each genotype listed below. Two independent clones were used for *Brca2<sup>KO/KO</sup>* mES cells expressing C3233Wfs variant and are marked as clone 1 and 2. \*\*\*\* represents  $P < 0.0001$  (Mann-Whitney test). Error bars represent mean  $\pm$  s.d. c) Scatter plot for DNA fiber assay of the indicated genotype. *Brca2<sup>KO/KO</sup>* mES cells expressing WT and Y3308X were used as positive and negative controls respectively. Error bars represent mean  $\pm$  s.d. P values were calculated by Mann-Whitney test and \*\*\*\* represents  $< 0.0001$ .

# Supplementary Figure 6

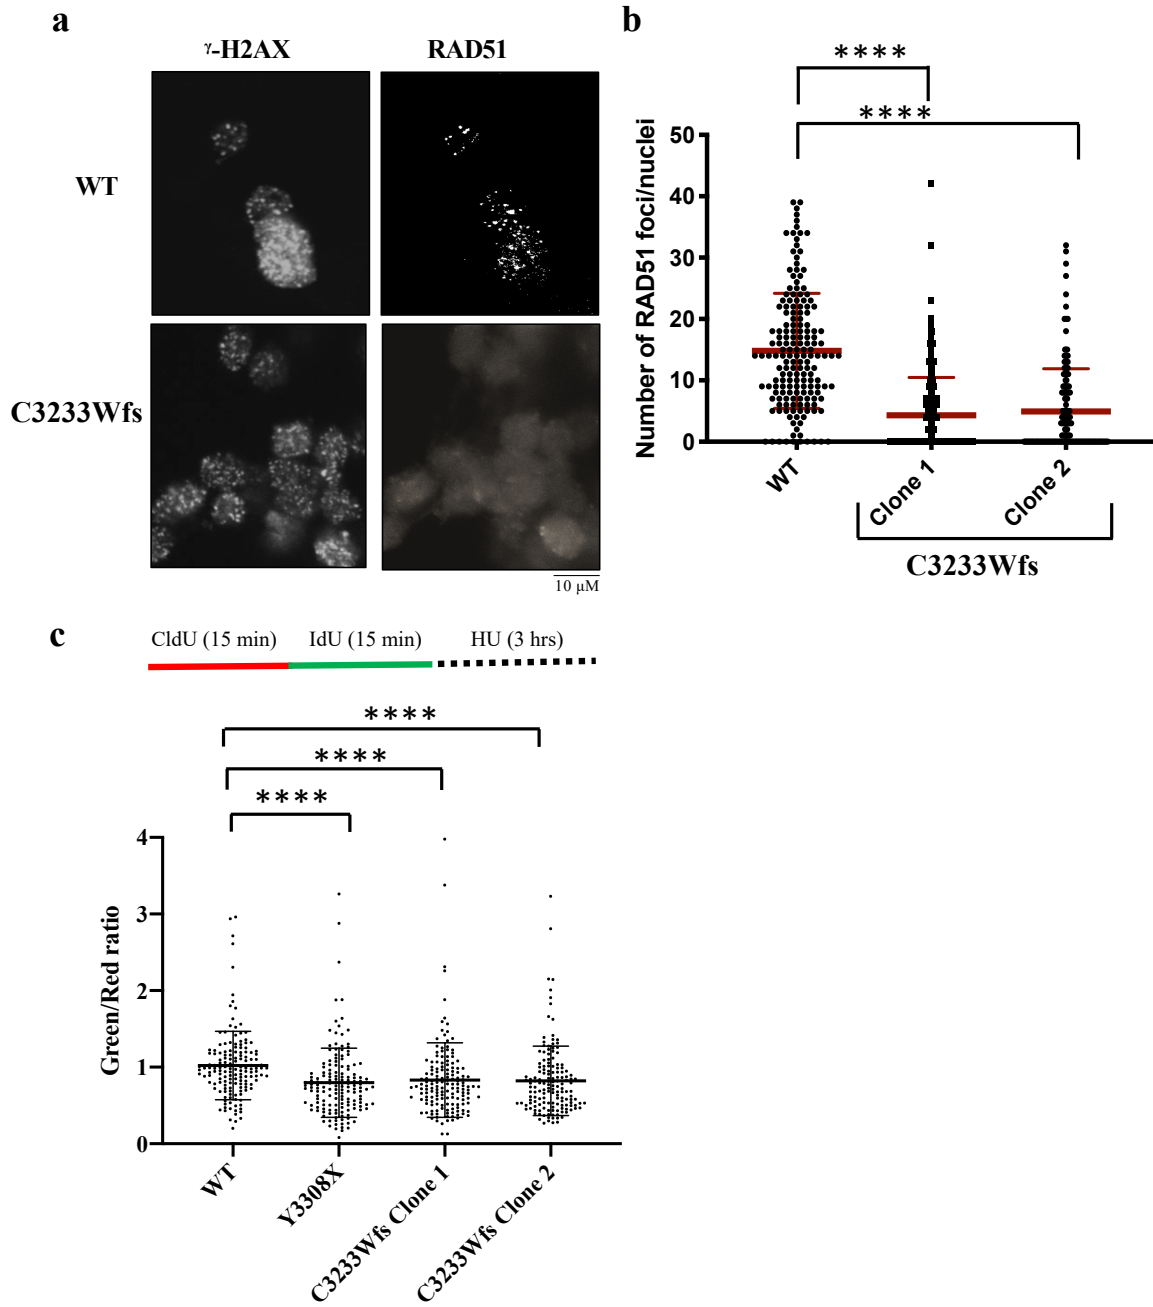

**Supplementary Figure 7: *BRCA2* expression of variants.** Uncropped Western blot results showing the expression of *BRCA2* in two independent clones (marked as 1 and 2) expressing the indicated variant as shown in Fig S2. GAPDH or Vinculin was used as loading control as marked on the autorad.

Supp Fig 7

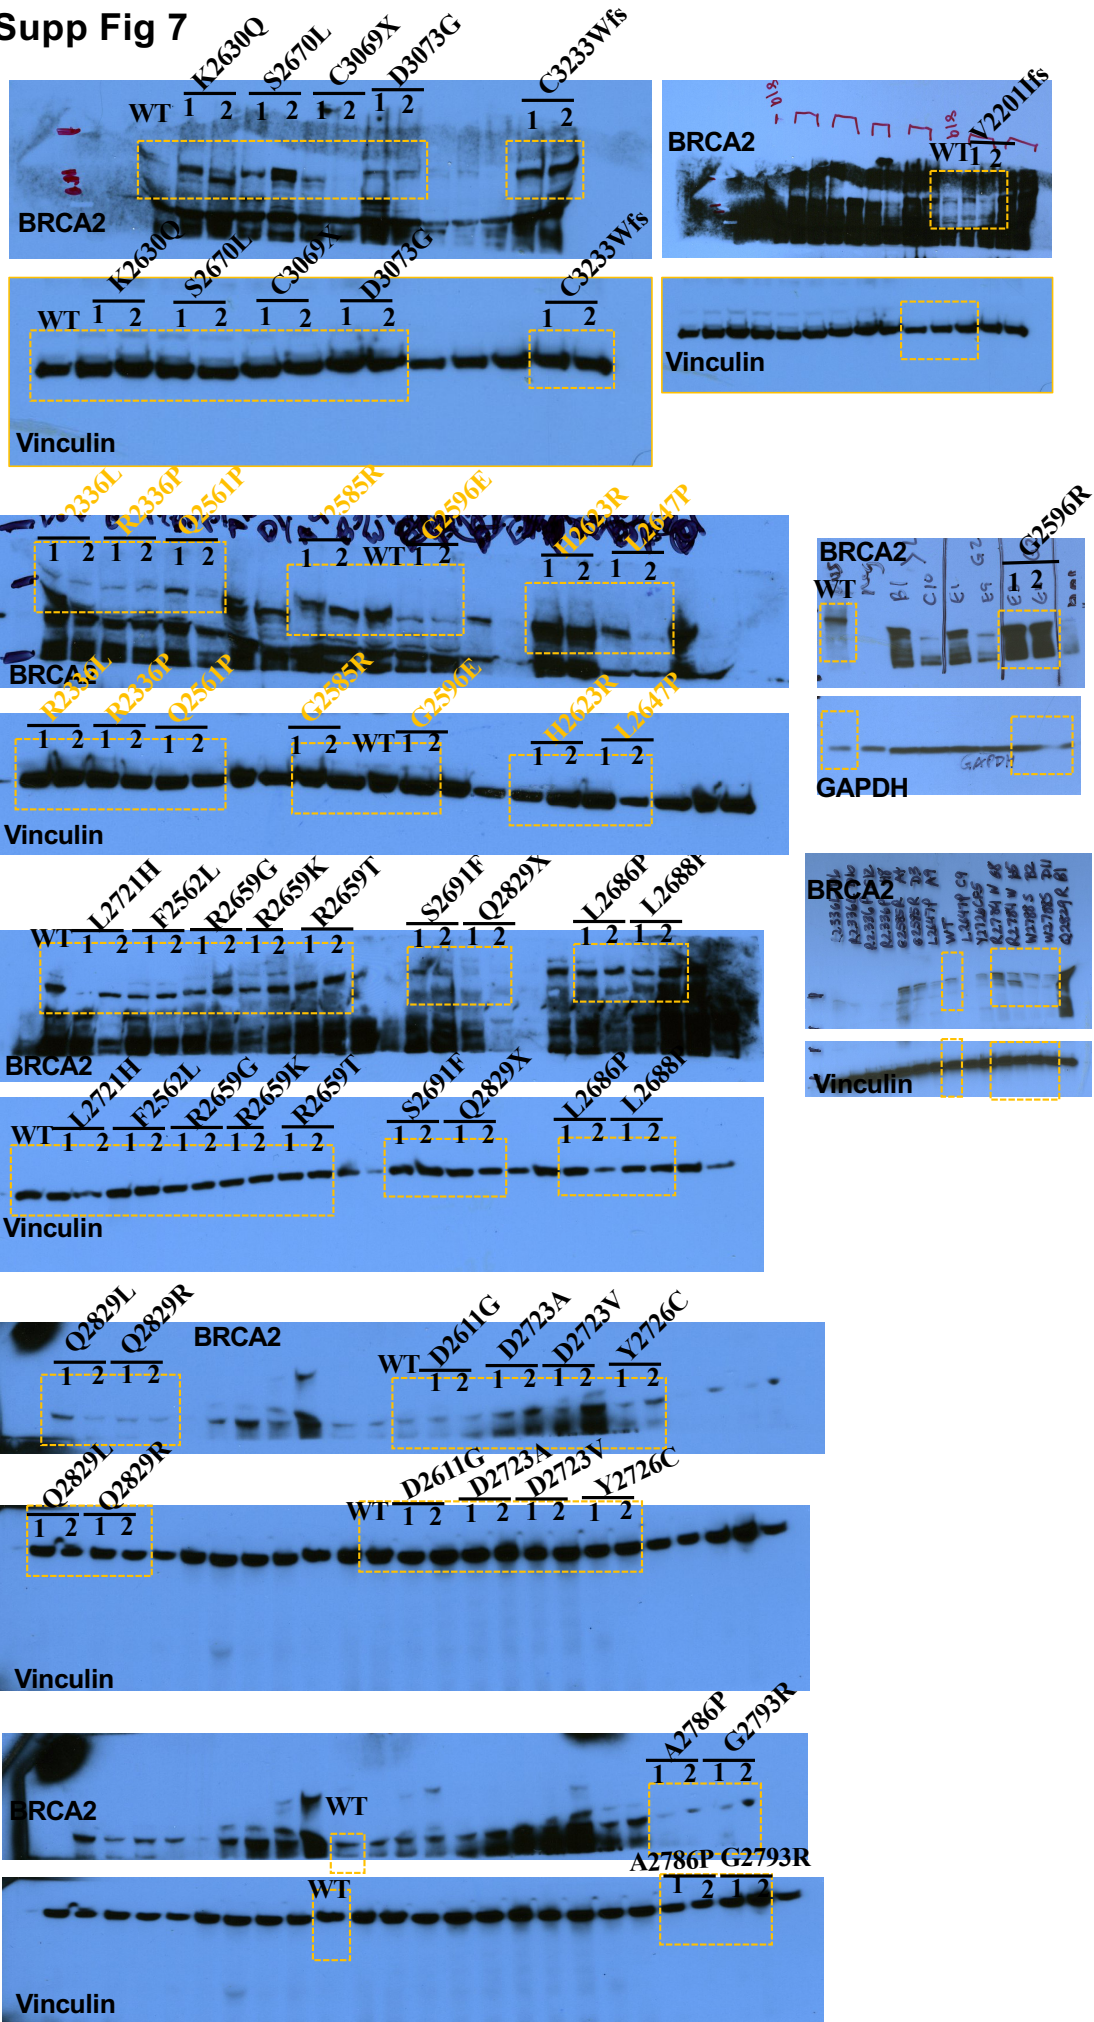

**Supplementary Table 1: List of *BRC42* variants examined by mouse ESC-based functional assay**

| Variant <sup>a</sup>        | Amino acid change <sup>b</sup>              | Ex no. | Splice Distance <sup>c</sup> | IARC class | Align GVDG Class | Prior Prob. (PPP) <sup>d</sup> | ClinVar <sup>e</sup>                                             | BRCA Exchange |
|-----------------------------|---------------------------------------------|--------|------------------------------|------------|------------------|--------------------------------|------------------------------------------------------------------|---------------|
| c.47A>G                     | p.Lys16Arg (K16R)                           | 2      | -21                          |            | Class C0         | 0.03                           | Uncertain (1)                                                    |               |
| c.502C>A                    | p.Pro168Thr (P168T)                         | 6      | -15                          |            | Class C35        | 0.02                           | Benign (10)                                                      | Benign        |
| c.506A>G                    | p.Lys169Arg (K169R)                         | 6      | -11                          | 2          | Class C25        | 0.3                            | Benign (1)/Likely Benign (5)/Uncertain (5)                       |               |
| c.658_659del GT (886del GT) | p.Val220Ilefs (V220Ifs)                     | 8      |                              |            |                  |                                | Pathogenic (29)                                                  | Pathogenic    |
| c.796T>C                    | p.Phe266Leu (F266L)                         | 10     | 3                            |            | Class C0         | 0.04                           | Likely Benign (3)/Uncertain (3)                                  |               |
| c.831 T>G                   | p.Asn277Lys (N277K)                         | 10     | 38                           | 2          | Class C0         | 0.02                           | Benign (1)/Likely benign (7)/Uncertain (3)/Likely pathogenic (1) |               |
| c.1354C>G                   | p.Leu452Val (L452V)                         | 10     | -556                         |            | Class C0         | 0.02                           |                                                                  |               |
| c.1792A>G                   | p.Thr598Ala (T598A)                         | 10     | -118                         | 1          | Class C0         | 0.02                           | Benign (25)                                                      | Benign        |
| c.1793C>T                   | p.Thr598Ile (T598I)                         | 10     | -117                         |            | Class C0         | 0.02                           | Uncertain (6)                                                    |               |
| c.1911T>G                   | p.Gly637= (G637G)                           | 11     | 2                            |            |                  | 0.04                           | Likely Benign (2)                                                | Likely Benign |
| c.2224C>T                   | p.Gln742Ter (Q742X)                         | 11     | 315                          |            |                  | 0.99                           | Pathogenic (12)                                                  | Pathogenic    |
| c.2606C>T                   | p.Ser869Leu (S869L)                         | 11     | 697                          | 3          | Class C0         | 0.02                           | Likely Benign (1)/Uncertain (2)                                  |               |
| c.2957A>G                   | p.Asn986Ser (N986S)                         | 11     | 1048                         |            | Class C0         | 0.02                           | Benign (1)/Uncertain (4)/Likely Benign (3)                       |               |
| c.2957A>T                   | p.Asn986Ile (N986I)                         | 11     | 1048                         |            | Class C0         | 0.02                           | Uncertain (4)                                                    |               |
| c.3900_3902 del             | p.Met1300Ile+1301Thr del (M1300I+1301T del) | 11     |                              |            |                  |                                | Uncertain (1)                                                    |               |
| c.3904_3906 del             | p.Thr1302 del (T1302 del)                   | 11     |                              |            |                  |                                | Pathogenic (1)/Uncertain (1)                                     |               |
| c.3922G>T                   | p.Glu1308Ter (E1308X)                       | 11     | 2013                         |            |                  | 0.99                           | Pathogenic (16)                                                  | Pathogenic    |
| c.4436G>C                   | p.Ser1479Thr (S1479T)                       | 11     | -2406                        |            | Class C0         | 0.02                           | Uncertain (4)/Likely Benign (3)                                  |               |
| c.4570T>G                   | p.Phe1524Val (F1524V)                       | 11     | -2272                        |            | Class C45        | 0.02                           | Benign (12)                                                      | Benign        |
| c.4585G>A                   | p.Gly1529Arg (G1529R)                       | 11     | -2257                        |            | Class C65        | 0.02                           | Benign (22)                                                      | Benign        |
| c.4870A>G                   | p.Thr1624Ala (T1624A)                       | 11     | -1972                        |            | Class C0         | 0.02                           |                                                                  |               |

|                            |                              |    |       |   |           |      |                                                      |            |
|----------------------------|------------------------------|----|-------|---|-----------|------|------------------------------------------------------|------------|
| c.4928T>C                  | p.Val1643Ala (V1643A)        | 11 | -1914 |   | Class C0  | 0.02 | Benign (1)/<br>Uncertain<br>(2)/Likely Benign<br>(5) |            |
| c.5341G>A                  | p.Asp1781Asn (D1781N)        | 11 | -1501 |   | Class C0  | 0.02 | Uncertain (5)                                        |            |
| c.5342A>G                  | p.Asp1781Gly (D1781G)        | 11 | -1500 |   | Class C0  | 0.02 | Uncertain (3)                                        |            |
| c.5640T>G                  | p.Asn1880Lys (N1880K)        | 11 | -1202 | 2 | Class C0  | 0.02 | Benign (23)                                          | Benign     |
| c.5645C>G                  | p.Ser1882Ter (S1882X)        | 11 | -1197 |   |           | 0.99 | Pathogenic (23)                                      | Pathogenic |
| c.5649A>C                  | p.Lys1883Asn (K1883N)        | 11 | -1193 | 2 | Class C0  | 0.02 | Uncertain<br>(3)/Likely Benign<br>(2)                |            |
| c.5651T>C                  | p.Ile1884Thr (I1884T)        | 11 | -1191 | 2 | Class C0  | 0.02 | Likely Benign<br>(1)/Uncertain (1)                   |            |
| c.5778delT<br>(6005delT)   | p.Ser1962Argfs<br>(S1926Rfs) | 11 |       |   |           |      | Pathogenic (1)                                       | Pathogenic |
| c.5896C>T                  | p.His1996Tyr (H1996Y)        | 11 |       | 2 |           | 0.02 |                                                      |            |
| c.6317T>C                  | p.Leu2106Pro (L2106P)        | 11 | -525  | 2 | Class C0  | 0.02 | Benign (2)/Likely<br>Benign<br>(6)/Uncertain (3)     |            |
| c.6455C>A                  | p.Ser2152Tyr (S2152Y)        | 11 | -387  | 1 | Class C15 | 0.02 | Benign (10)                                          | Benign     |
| c.6842G>T                  | p.Gly2281Val (G2281V)        | 12 | 1     |   | Class C65 | 0.34 | Uncertain (4)                                        |            |
| c.6935A>T                  | p.Asp2312Val (D2312V)        | 12 | -3    | 1 | Class C65 | 0.50 | Benign (16)                                          | Benign     |
| c.6936T>A                  | p.Asp2312Glu (D2312E)        | 12 | -2    |   | Class C35 | 0.04 | Uncertain (1)                                        |            |
| c.7007G>T                  | p.Arg2336Leu (R2336L)        | 13 | -1    |   | Class C0  | 0.34 | Pathogenic<br>(3)/Likely<br>Pathogenic (4)           |            |
| c.7007G>C                  | p.Arg2336Pro (R2336P)        | 13 | -1    |   | Class C0  | 0.34 | Pathogenic (13)                                      |            |
| c.7232A>C                  | p.Lys2411Thr (K2411T)        | 14 | -204  | 1 | Class C65 | 0.02 | Benign (12)                                          | Benign     |
| c.7447A>G                  | p.Ser2483G (S2483G)          | 15 | 12    |   | Class C0  | 0.03 | Uncertain (7)                                        |            |
| c.7448G>A                  | p.Ser2483Asn (S2483N)        | 15 | 13    | 2 | Class C0  | 0.03 | Uncertain<br>(3)/Likely Benign<br>(7)                |            |
| c.7463insAT(<br>7691insAT) | p.Arg2488Argfs<br>(R2488Rfs) | 15 |       |   |           |      |                                                      |            |
| c.7463G>A                  | p.Arg2488Lys (R2488K)        | 15 | 28    | 3 | Class C0  | 0.03 | Uncertain<br>(3)/Likely Benign<br>(5)                |            |
| c.7464A>C                  | p.Arg2488Ser (R2488S)        | 15 | 29    |   | Class C35 | 0.66 | Uncertain (7)                                        |            |
| c.7466A>G                  | p.Asp2489Gly (D2489G)        | 15 | 30    | 3 | Class C15 | 0.30 | Uncertain (8)                                        |            |

|                        |                            |    |      |   |           |      |                                                       |            |
|------------------------|----------------------------|----|------|---|-----------|------|-------------------------------------------------------|------------|
| c.7682A>C              | p.Gln2561Pro (Q2561P)      | 16 | 65   |   | Class C15 | 0.29 | Uncertain (2)                                         |            |
| c.7684T>C              | p.Phe2562Leu (F2562L)      | 16 | 67   |   | Class C15 | 0.29 | Uncertain (6)                                         |            |
| c.7753G>A              | p.Gly2585Arg (G2585R)      | 16 | -53  |   | Class C65 | 0.81 | Uncertain (2)/Likely Pathogenic (1)                   |            |
| c.7759C>T              | p.Leu2587Phe (L2587F)      | 16 | -47  |   | Class C15 | 0.29 | Likely Benign (1)/Uncertain (7)/Likely Pathogenic (1) |            |
| c.7786G>A              | p.Gly2596Arg (G2596R)      | 16 | -20  |   | Class C65 | 0.81 | Uncertain (8)                                         |            |
| c.7787G>A              | p.Gly2596Glu (G2596E)      | 16 | -19  |   | Class C65 | 0.81 | Uncertain (2)                                         |            |
| c.7832A>G              | p.Asp2611Gly (D2611G)      | 17 | 27   |   | Class C65 | 0.81 | Uncertain (5)                                         |            |
| c.7865A>G              | p.Asn2622Ser (N2622S)      | 17 | 60   |   | Class C45 | 0.66 | Uncertain (9)                                         |            |
| c.7868A>G              | p.His2623Arg (H2623R)      | 17 | 63   |   | Class C25 | 0.29 | Uncertain (3)/Likely Pathogenic (4)                   |            |
| c.7888A>C              | p.Lys2630Gln (K2630Q)      | 17 | 83   |   | Class C45 | 0.66 |                                                       |            |
| c.7940T>C              | p.Leu2647Pro (L2647P)      | 17 | -37  |   | Class C65 | 0.81 | Likely Pathogenic (6)                                 |            |
| c.7975A>G              | p.Arg2659Gly (R2659G)      | 17 | -2   | 5 | Class C65 | 0.81 | Pathogenic (6)                                        | Pathogenic |
| c.7976G>A              | p.Arg2659Lys (R2659K)      | 17 | -1   | 5 | Class C25 | 0.34 | Pathogenic (18)                                       |            |
| c.7976G>C              | p.Arg2659Thr (R2659T)      | 17 | -1   | 5 | Class C65 | 0.81 | Pathogenic (3)                                        | Pathogenic |
| c.8009C>T              | p.Ser2670Leu (S2670L)      | 18 | 33   | 4 | Class C65 | 0.29 | Pathogenic (2)/Likely Pathogenic (6)/Uncertain (1)    |            |
| c.8042C>G              | p.Thr2681Arg (T2681R)      | 18 | 66   |   | Class C0  | 0.03 | Likely Benign (1)/Uncertain (9)                       |            |
| c.8057T>C              | p.Leu2686Pro (L2686P)      | 18 | 81   |   | Class C65 | 0.66 | Likely Pathogenic (5)                                 |            |
| c.8063T>C              | p.Leu2688Pro (L2688P)      | 18 | 87   |   | Class C65 | 0.81 | Pathogenic (1)/Likely Pathogenic (5)                  |            |
| c.8072C>T              | p.Ser2691Phe (S2691F)      | 18 | 96   |   | Class C15 | 0.03 | Uncertain (2)                                         |            |
| c.8122dupA (8122 insA) | p.Thr2708Asn fs (T2708Nfs) | 18 |      |   |           |      |                                                       |            |
| c.8162T>A              | p.Leu2721His (L2721H)      | 18 | -170 |   | Class C25 | 0.29 | Uncertain (1)/Likely Pathogenic (1)                   |            |
| c.8168A>C              | p.Asp2723Ala (D2723A)      | 18 | -164 |   | Class C65 | 0.81 | Uncertain (1)/Likely Pathogenic (4)                   |            |



|                                      |                              |    |      |   |           |      |                                                              |            |
|--------------------------------------|------------------------------|----|------|---|-----------|------|--------------------------------------------------------------|------------|
| c.8168A>T                            | p.Asp2723Val<br>(D2723V)     | 18 | -164 |   | Class C65 | 0.81 | Likely Pathogenic<br>(4)                                     |            |
| c.8177A>G                            | p.Tyr2726Cys<br>(Y2726C)     | 18 | -155 |   | Class C65 | 0.81 | Uncertain<br>(2)/Likely<br>Pathogenic (2)                    |            |
| c.8182G>A                            | p.Val2728Ile<br>(V2728I)     | 18 | -150 | 1 | Class C0  | 0.03 | Benign (31)                                                  | Benign     |
| c.8215G>A                            | p.Val2739Ile<br>(V2739I)     | 18 | -117 | 3 | Class C0  | 0.03 | Benign (1)/Likely<br>Benign<br>(6)/Uncertain (4)             |            |
| c.8219T>A                            | p.Leu2740Ter<br>(L2740X)     | 18 | -113 |   |           | 0.99 | Pathogenic (4)                                               | Pathogenic |
| c.8350C>T                            | p.Arg2784Trp<br>(R2784W)     | 19 | 19   |   | Class C65 | 0.81 | Uncertain<br>(2)/Likely<br>Pathogenic (5)                    |            |
| c.8356G>C                            | p.Ala2786Pro<br>(A2786P)     | 19 | 25   |   | Class C0  | 0.03 | Uncertain (1)                                                |            |
| c.8363G>C                            | p.Trp2788Ser<br>(W2788S)     | 19 | 32   |   | Class C65 | 0.66 | Likely Pathogenic<br>(2)                                     |            |
| c.8377G>A                            | p.Gly2793Arg<br>(G2793R)     | 19 | 46   |   | Class C65 | 0.81 | Pathogenic<br>(8)/Likely<br>Pathogenic (3)                   |            |
| c.8485C>T                            | p.Gln2829Ter<br>(Q2829X)     | 19 | -3   |   |           | 0.99 | Pathogenic (3)                                               | Pathogenic |
| c.8486A>T                            | p.Gln2829Leu<br>(Q2829L)     | 19 | -2   |   | Class C65 | 0.34 | Uncertain (1)                                                |            |
| c.8486A>G                            | p.Gln2829Arg<br>(Q2829R)     | 19 | -2   | 3 | Class C35 | 0.34 | Uncertain<br>(1)/Likely<br>Pathogenic (2)/<br>Pathogenic (1) |            |
| c.9187C>T                            | p.Pro3063Ser<br>(P3063S)     | 24 | 70   | - | Class C0  | 0.03 | Uncertain<br>(1)/Likely Benign<br>(2)                        |            |
| c.9190G>A                            | p.Asp3064Asn<br>(D3064N)     | 24 | -67  | - | Class C0  | 0.03 | Benign (1)/ Likely<br>Benign (3)/<br>Uncertain (2)           |            |
| c.9190G>T                            | p.Asp3064Tyr<br>(D3064Y)     | 24 | -67  |   | Class C0  | 0.03 | Uncertain (6)                                                |            |
| c.9195T>A                            | p.Phe3065Leu<br>(F3065L)     | 24 | -62  |   | Class C0  | 0.03 | Uncertain (3)                                                |            |
| c.9196C>G                            | p.Gln3066Glu<br>(Q3066E)     | 24 | -61  |   | Class C0  | 0.03 | Uncertain (1)                                                |            |
| c.9207T>A                            | p.Cys3069Ter<br>(C3069X)     | 24 | -50  |   |           | 0.99 | Pathogenic (3)                                               | Pathogenic |
| c.9218A>G                            | p.Asp3073Gly<br>(D3073G)     | 24 | -39  |   | Class C65 | 0.81 | Uncertain (10)                                               |            |
| c.9672dupA<br>(9900insA)             | p.Tyr3225Ilefs<br>(Y3225Ifs) | 27 |      |   |           |      | Pathogenic<br>(1)/Likely<br>Pathogenic (1)                   | Pathogenic |
| c.9699_9702<br>delTATG<br>(9927del4) | p.Cys3233Trpfs<br>(C3233Wfs) | 27 |      |   |           |      | Pathogenic (17)                                              | Pathogenic |
| c.9924C>G                            | p.Tyr3308Ter<br>(Y3308X)     | 27 | 276  |   |           | 0.50 | Pathogenic (13)                                              | Pathogenic |

<sup>a</sup>Variant names following HGVS nomenclature guidelines

<sup>b</sup>Amino acid change as per HGVS guidelines. Variant name using single letter amino acid code shown within parenthesis indicates the variant name used in the text and figures

<sup>c</sup>Splice Distance indicates distance of the variant from the nearest intron-exon junction.

<sup>d</sup>Prior probabilities of pathogenicity (PPP) based on in silico prediction of pathogenicity (<http://hci-priors.hci.utah.edu/PRIORS/>)

<sup>e</sup>Number of ClinVar entries as of 23<sup>rd</sup> September 2020 are indicated in parentheses.

**SUPPLEMENTARY TABLE 2: Survival of *Brca2KO/KO* cells expressing different *BRCA2* variants in HAT media.**

| Variant <sup>a</sup> | Batch <sup>b</sup> | Number Survived (HAT) <sup>c</sup> | Total Number (M15) <sup>d</sup> | Percent Survived <sup>e</sup> |
|----------------------|--------------------|------------------------------------|---------------------------------|-------------------------------|
| P168T                | 21                 | 1406                               | 9428                            | 14.91                         |
| P168T                | 21                 | 1186                               | 9620                            | 12.33                         |
| WT                   | 21                 | 851                                | 6986                            | 12.18                         |
| V220Ifs              | 63                 | 379                                | 9165                            | 4.14                          |
| V220Ifs              | 63                 | 32                                 | 5592                            | 0.57                          |
| WT                   | 63                 | 1962                               | 9300                            | 21.10                         |
| F266L                | 44                 | 534                                | 3418                            | 15.62                         |
| F266L                | 44                 | 588                                | 4496                            | 13.08                         |
| WT                   | 44                 | 1351                               | 8361                            | 16.16                         |
| H1996Y               | 33                 | 1303                               | 7170                            | 18.17                         |
| H1996Y               | 33                 | 893                                | 7524                            | 11.87                         |
| WT                   | 33                 | 1045                               | 7045                            | 14.83                         |
| E1308X               | 46                 | 0                                  | 9930                            | 0.00                          |
| E1308X               | 46                 | 0                                  | 10999                           | 0.00                          |
| WT                   | 46                 | 1373                               | 7679                            | 17.88                         |
| V1643A               | 38                 | 1416                               | 7379                            | 19.19                         |
| V1643A               | 38                 | 1012                               | 7966                            | 12.70                         |
| WT                   | 38                 | 1146                               | 8078                            | 14.19                         |
| S2483N               | 19                 | 1090                               | 10204                           | 10.68                         |
| S2483N               | 19                 | 1030                               | 8164                            | 12.62                         |
| WT                   | 19                 | 835                                | 4765                            | 17.52                         |
| S2483G               | 39                 | 4104                               | 12111                           | 33.89                         |
| S2483G               | 39                 | 2352                               | 10788                           | 21.80                         |
| WT                   | 39                 | 1206                               | 7696                            | 15.67                         |
| R2488S               | 29                 | 2101                               | 8649                            | 24.29                         |
| R2488S               | 29                 | 1954                               | 7247                            | 26.96                         |
| WT                   | 29                 | 943                                | 6943                            | 13.58                         |
| A2487Mfs*37          | 15                 | 0                                  | 8207                            | 0.00                          |
| A2487Mfs*37          | 15                 | 0                                  | 9613                            | 0.00                          |
| WT                   | 15                 | 755                                | 8323                            | 9.07                          |
| V2739I               | 30                 | 825                                | 6538                            | 12.62                         |
| V2739I               | 30                 | 2124                               | 8648                            | 24.56                         |
| WT                   | 30                 | 944                                | 6509                            | 14.50                         |
| L2740X               | 17                 | 0                                  | 13022                           | 0.00                          |
| L2740X               | 17                 | 0                                  | 14212                           | 0.00                          |
| WT                   | 17                 | 787                                | 11796                           | 6.67                          |
| T2681R               | 53                 | 1439                               | 8656                            | 16.62                         |

| <b>Variant<sup>a</sup></b> | <b>Batch<sup>b</sup></b> | <b>Number Survived (HAT)<sup>c</sup></b> | <b>Total Number (M15)<sup>d</sup></b> | <b>Percent Survived<sup>e</sup></b> |
|----------------------------|--------------------------|------------------------------------------|---------------------------------------|-------------------------------------|
| T2681R                     | 53                       | 1270                                     | 7065                                  | 17.98                               |
| WT                         | 53                       | 1536                                     | 9247                                  | 16.61                               |
| S2670L                     | 46                       | 0                                        | 7392                                  | 0.00                                |
| S2670L                     | 46                       | 0                                        | 9521                                  | 0.00                                |
| WT                         | 46                       | 1373                                     | 7679                                  | 17.88                               |
| Q3066E                     | 30                       | 1305                                     | 6664                                  | 19.58                               |
| Q3066E                     | 30                       | 1953                                     | 8842                                  | 22.09                               |
| WT                         | 30                       | 944                                      | 6509                                  | 14.50                               |
| D3064Y                     | 20                       | 801                                      | 8332                                  | 9.61                                |
| D3064Y                     | 20                       | 1434                                     | 7570                                  | 18.94                               |
| WT                         | 20                       | 841                                      | 7768                                  | 10.83                               |
| P3063S                     | 16                       | 1798                                     | 8210                                  | 21.90                               |
| P3063S                     | 16                       | 519                                      | 5429                                  | 9.56                                |
| WT                         | 16                       | 782                                      | 8128                                  | 9.62                                |
| D3073G                     | 57                       | 239                                      | 7149                                  | 3.34                                |
| D3073G                     | 57                       | 336                                      | 10188                                 | 3.30                                |
| WT                         | 57                       | 1720                                     | 9231                                  | 18.63                               |
| D3064N                     | 51                       | 2429                                     | 12121                                 | 20.04                               |
| D3064N                     | 51                       | 1700                                     | 10362                                 | 16.41                               |
| WT                         | 51                       | 1483                                     | 7662                                  | 19.36                               |
| C3233Wfs                   | 60                       | 90                                       | 9847                                  | 0.91                                |
| C3233Wfs                   | 60                       | 432                                      | 11052                                 | 3.91                                |
| WT                         | 60                       | 1802                                     | 9237                                  | 19.51                               |
| S869L                      | 10                       | 1365                                     | 8233                                  | 16.58                               |
| S869L                      | 10                       | 900                                      | 5435                                  | 16.56                               |
| WT                         | 10                       | 602                                      | 7329                                  | 8.21                                |
| G1529R                     | 34                       | 2742                                     | 9563                                  | 28.67                               |
| G1529R                     | 34                       | 1529                                     | 10052                                 | 15.21                               |
| WT                         | 34                       | 1062                                     | 10256                                 | 10.35                               |
| F1524V                     | 10                       | 1416                                     | 10689                                 | 13.25                               |
| F1524V                     | 10                       | 1208                                     | 7075                                  | 17.07                               |
| WT                         | 10                       | 602                                      | 7329                                  | 8.21                                |
| R2336L                     | 42                       | 385                                      | 4082                                  | 9.43                                |
| R2336L                     | 42                       | 649                                      | 10062                                 | 6.45                                |
| WT                         | 42                       | 1283                                     | 10151                                 | 12.64                               |
| D2312V                     | 51                       | 2287                                     | 8121                                  | 28.16                               |
| D2312V                     | 51                       | 2143                                     | 9705                                  | 22.08                               |
| WT                         | 51                       | 1483                                     | 7662                                  | 19.36                               |
| D2312E                     | 56                       | 1185                                     | 8369                                  | 14.16                               |

| <b>Variant<sup>a</sup></b> | <b>Batch<sup>b</sup></b> | <b>Number Survived (HAT)<sup>c</sup></b> | <b>Total Number (M15)<sup>d</sup></b> | <b>Percent Survived<sup>e</sup></b> |
|----------------------------|--------------------------|------------------------------------------|---------------------------------------|-------------------------------------|
| D2312E                     | 56                       | 1286                                     | 9075                                  | 14.17                               |
| WT                         | 56                       | 1635                                     | 8775                                  | 18.63                               |
| G637G                      | 31                       | 1516                                     | 5003                                  | 30.30                               |
| G637G                      | 31                       | 528                                      | 5194                                  | 10.17                               |
| WT                         | 31                       | 960                                      | 9455                                  | 10.15                               |
| T2708N*                    | 52                       | 0                                        | 9428                                  | 0.00                                |
| T2708N*                    | 52                       | 0                                        | 7857                                  | 0.00                                |
| WT                         | 52                       | 1514                                     | 9517                                  | 15.91                               |
| N2622S                     | 13                       | 459                                      | 7088                                  | 6.48                                |
| N2622S                     | 13                       | 663                                      | 6098                                  | 10.87                               |
| WT                         | 13                       | 694                                      | 4940                                  | 14.05                               |
| G2281V                     | 13                       | 1107                                     | 6679                                  | 16.57                               |
| G2281V                     | 13                       | 522                                      | 3287                                  | 15.88                               |
| WT                         | 13                       | 694                                      | 4940                                  | 14.05                               |
| Q2829L                     | 32                       | 0                                        | 9893                                  | 0.00                                |
| Q2829L                     | 32                       | 0                                        | 9521                                  | 0.00                                |
| WT                         | 32                       | 996                                      | 9016                                  | 11.05                               |
| Q2829R                     | 32                       | 0                                        | 9191                                  | 0.00                                |
| Q2829R                     | 32                       | 0                                        | 8722                                  | 0.00                                |
| WT                         | 32                       | 996                                      | 9016                                  | 11.05                               |
| H2623R                     | 47                       | 0                                        | 8309                                  | 0.00                                |
| H2623R                     | 47                       | 0                                        | 11042                                 | 0.00                                |
| WT                         | 47                       | 1383                                     | 9392                                  | 14.73                               |
| K1883N                     | 55                       | 1358                                     | 6907                                  | 19.66                               |
| K1883N                     | 55                       | 1689                                     | 7286                                  | 23.18                               |
| WT                         | 55                       | 1583                                     | 10610                                 | 14.92                               |
| Q742X                      | 9                        | 0                                        | 8956                                  | 0.00                                |
| Q742X                      | 9                        | 0                                        | 8118                                  | 0.00                                |
| WT                         | 9                        | 575                                      | 9771                                  | 5.88                                |
| S1882X                     | 9                        | 0                                        | 4478                                  | 0.00                                |
| S1882X                     | 9                        | 0                                        | 7372                                  | 0.00                                |
| WT                         | 9                        | 575                                      | 9771                                  | 5.88                                |
| K16R                       | 2                        | 648                                      | 4320                                  | 15.00                               |
| K16R                       | 2                        | 1817                                     | 4129                                  | 44.01                               |
| WT                         | 2                        | 372                                      | 4221                                  | 8.81                                |
| D1781N                     | 24                       | 297                                      | 5775                                  | 5.14                                |
| D1781N                     | 24                       | 471                                      | 9775                                  | 4.82                                |
| WT                         | 24                       | 882                                      | 10131                                 | 8.71                                |
| I1884T                     | 8                        | 361                                      | 5429                                  | 6.65                                |

| <b>Variant<sup>a</sup></b> | <b>Batch<sup>b</sup></b> | <b>Number Survived (HAT)<sup>c</sup></b> | <b>Total Number (M15)<sup>d</sup></b> | <b>Percent Survived<sup>e</sup></b> |
|----------------------------|--------------------------|------------------------------------------|---------------------------------------|-------------------------------------|
| I1884T                     | 8                        | 355                                      | 8653                                  | 4.10                                |
| WT                         | 8                        | 566                                      | 6679                                  | 8.47                                |
| C3069X                     | 28                       | 0                                        | 9098                                  | 0.00                                |
| C3069X                     | 28                       | 0                                        | 12777                                 | 0.00                                |
| WT                         | 28                       | 930                                      | 12220                                 | 7.61                                |
| R2336P                     | 26                       | 120                                      | 7399                                  | 1.62                                |
| R2336P                     | 26                       | 347                                      | 9002                                  | 3.85                                |
| WT                         | 26                       | 912                                      | 10250                                 | 8.90                                |
| K2411T                     | 64                       | 1472                                     | 9606                                  | 15.32                               |
| K2411T                     | 64                       | 1949                                     | 5980                                  | 32.59                               |
| WT                         | 64                       | 2241                                     | 13362                                 | 16.77                               |
| D2489G                     | 5                        | 0                                        | 6630                                  | 0.00                                |
| D2489G                     | 5                        | 0                                        | 6075                                  | 0.00                                |
| WT                         | 5                        | 529                                      | 10817                                 | 4.89                                |
| R2488K                     | 36                       | 751                                      | 7425                                  | 10.11                               |
| R2488K                     | 36                       | 901                                      | 7438                                  | 12.11                               |
| WT                         | 36                       | 1066                                     | 9590                                  | 11.12                               |
| F3065L                     | 2                        | 334                                      | 3627                                  | 9.21                                |
| F3065L                     | 2                        | 308                                      | 3802                                  | 8.10                                |
| WT                         | 2                        | 372                                      | 4221                                  | 8.81                                |
| N1880K                     | 7                        | 434                                      | 8237                                  | 5.27                                |
| N1880K                     | 7                        | 496                                      | 8950                                  | 5.54                                |
| WT                         | 7                        | 553                                      | 8933                                  | 6.19                                |
| Y3308X                     | 45                       | 11                                       | 7831                                  | 0.14                                |
| Y3308X                     | 45                       | 39                                       | 6646                                  | 0.59                                |
| WT                         | 45                       | 1352                                     | 8302                                  | 16.29                               |
| L2688P                     | 66                       | 0                                        | 8003                                  | 0.00                                |
| L2688P                     | 66                       | 0                                        | 8220                                  | 0.00                                |
| WT                         | 66                       | 2665                                     | 8547                                  | 31.18                               |
| G2596E                     | 40                       | 0                                        | 10124                                 | 0.00                                |
| G2596E                     | 40                       | 40                                       | 7019                                  | 0.57                                |
| WT                         | 40                       | 1229                                     | 11444                                 | 10.74                               |
| L2721H                     | 54                       | 0                                        | 9085                                  | 0.00                                |
| L2721H                     | 54                       | 0                                        | 9085                                  | 0.00                                |
| WT                         | 54                       | 1547                                     | 7049                                  | 21.95                               |
| L2587F                     | 54                       | 1300                                     | 11121                                 | 11.69                               |
| L2587F                     | 54                       | 1415                                     | 11105                                 | 12.74                               |
| WT                         | 54                       | 1547                                     | 7049                                  | 21.95                               |
| D2723A                     | 61                       | 0                                        | 11903                                 | 0.00                                |

| <b>Variant<sup>a</sup></b> | <b>Batch<sup>b</sup></b> | <b>Number Survived (HAT)<sup>c</sup></b> | <b>Total Number (M15)<sup>d</sup></b> | <b>Percent Survived<sup>e</sup></b> |
|----------------------------|--------------------------|------------------------------------------|---------------------------------------|-------------------------------------|
| D2723A                     | 61                       | 0                                        | 11636                                 | 0.00                                |
| WT                         | 61                       | 1856                                     | 11669                                 | 15.91                               |
| D2723V                     | 61                       | 0                                        | 11893                                 | 0.00                                |
| D2723V                     | 61                       | 0                                        | 10336                                 | 0.00                                |
| WT                         | 61                       | 1856                                     | 11669                                 | 15.91                               |
| G2585R                     | 6                        | 0                                        | 6679                                  | 0.00                                |
| G2585R                     | 6                        | 0                                        | 7706                                  | 0.00                                |
| WT                         | 6                        | 549                                      | 7831                                  | 7.01                                |
| K2630Q                     | 50                       | 0                                        | 8570                                  | 0.00                                |
| K2630Q                     | 50                       | 0                                        | 11375                                 | 0.00                                |
| WT                         | 50                       | 1449                                     | 11537                                 | 12.56                               |
| Q2561P                     | 58                       | 0                                        | 9682                                  | 0.00                                |
| Q2561P                     | 58                       | 0                                        | 9088                                  | 0.00                                |
| WT                         | 58                       | 1722                                     | 10715                                 | 16.07                               |
| N277K                      | 1                        | 1037                                     | 5388                                  | 19.25                               |
| N277K                      | 1                        | 1272                                     | 6788                                  | 18.74                               |
| WT                         | 1                        | 348                                      | 7303                                  | 4.77                                |
| Y3225Ifs                   | 49                       | 0                                        | 10098                                 | 0.00                                |
| Y3225Ifs                   | 49                       | 0                                        | 9956                                  | 0.00                                |
| WT                         | 49                       | 1436                                     | 10082                                 | 14.24                               |
| T598I                      | 59                       | 2078                                     | 9356                                  | 22.21                               |
| T598I                      | 59                       | 2205                                     | 7220                                  | 30.54                               |
| WT                         | 59                       | 1796                                     | 9758                                  | 18.41                               |
| S1479T                     | 62                       | 2442                                     | 8696                                  | 28.08                               |
| S1479T                     | 62                       | 2067                                     | 7181                                  | 28.78                               |
| WT                         | 62                       | 1889                                     | 7422                                  | 25.45                               |
| T1624A                     | 25                       | 862                                      | 12599                                 | 6.84                                |
| T1624A                     | 25                       | 852                                      | 11243                                 | 7.58                                |
| WT                         | 25                       | 894                                      | 10118                                 | 8.84                                |
| L452V                      | 62                       | 2449                                     | 8986                                  | 27.25                               |
| L452V                      | 62                       | 1825                                     | 6663                                  | 27.39                               |
| WT                         | 62                       | 1889                                     | 7422                                  | 25.45                               |
| T598A                      | 59                       | 1931                                     | 9012                                  | 21.43                               |
| T598A                      | 59                       | 2806                                     | 7897                                  | 35.53                               |
| WT                         | 59                       | 1796                                     | 9758                                  | 18.41                               |
| R2659K                     | 48                       | 0                                        | 9398                                  | 0.00                                |
| R2659K                     | 48                       | 0                                        | 8993                                  | 0.00                                |
| WT                         | 48                       | 1412                                     | 7461                                  | 18.93                               |
| R2659T                     | 48                       | 0                                        | 8079                                  | 0.00                                |

| <b>Variant<sup>a</sup></b> | <b>Batch<sup>b</sup></b> | <b>Number Survived (HAT)<sup>c</sup></b> | <b>Total Number (M15)<sup>d</sup></b> | <b>Percent Survived<sup>e</sup></b> |
|----------------------------|--------------------------|------------------------------------------|---------------------------------------|-------------------------------------|
| R2659T                     | 48                       | 0                                        | 9336                                  | 0.00                                |
| WT                         | 48                       | 1412                                     | 7461                                  | 18.93                               |
| L2686P                     | 14                       | 0                                        | 8910                                  | 0.00                                |
| L2686P                     | 14                       | 0                                        | 9643                                  | 0.00                                |
| WT                         | 14                       | 712                                      | 9352                                  | 7.61                                |
| S1926Rfs                   | 23                       | 0                                        | 10913                                 | 0.00                                |
| S1926Rfs                   | 23                       | 0                                        | 8481                                  | 0.00                                |
| WT                         | 23                       | 876                                      | 10355                                 | 8.46                                |
| N986S                      | 18                       | 1183                                     | 8484                                  | 13.94                               |
| N986S                      | 18                       | 883                                      | 9108                                  | 9.69                                |
| WT                         | 18                       | 812                                      | 9217                                  | 8.81                                |
| F2562L                     | 14                       | 0                                        | 13705                                 | 0.00                                |
| F2562L                     | 14                       | 0                                        | 11424                                 | 0.00                                |
| WT                         | 14                       | 712                                      | 9352                                  | 7.61                                |
| K169R                      | 59                       | 3958                                     | 8864                                  | 44.65                               |
| K169R                      | 59                       | 2169                                     | 8841                                  | 24.53                               |
| WT                         | 59                       | 1796                                     | 9758                                  | 18.41                               |
| G2596R                     | 65                       | 0                                        | 12243                                 | 0.00                                |
| G2596R                     | 65                       | 0                                        | 10123                                 | 0.00                                |
| WT                         | 65                       | 2436                                     | 8784                                  | 27.73                               |
| W2788S                     | 35                       | 639                                      | 8752                                  | 7.30                                |
| W2788S                     | 35                       | 491                                      | 10250                                 | 4.79                                |
| WT                         | 35                       | 1065                                     | 10197                                 | 10.44                               |
| R2784W                     | 35                       | 90                                       | 5667                                  | 1.59                                |
| R2784W                     | 35                       | 472                                      | 2894                                  | 16.31                               |
| WT                         | 35                       | 1065                                     | 10197                                 | 10.44                               |
| N986I                      | 18                       | 1183                                     | 8484                                  | 13.94                               |
| N986I                      | 18                       | 883                                      | 9108                                  | 9.69                                |
| WT                         | 18                       | 812                                      | 9217                                  | 8.81                                |
| Q2829X                     | 12                       | 0                                        | 7778                                  | 0.00                                |
| Q2829X                     | 12                       | 0                                        | 10966                                 | 0.00                                |
| WT                         | 12                       | 692                                      | 4976                                  | 13.91                               |
| V2728I                     | 22                       | 699                                      | 8415                                  | 8.31                                |
| V2728I                     | 22                       | 526                                      | 9210                                  | 5.71                                |
| WT                         | 22                       | 876                                      | 10335                                 | 8.48                                |
| Y2726C                     | 27                       | 0                                        | 9610                                  | 0.00                                |
| Y2726C                     | 27                       | 0                                        | 10247                                 | 0.00                                |
| WT                         | 27                       | 913                                      | 11114                                 | 8.21                                |
| L2106P                     | 41                       | 1575                                     | 10362                                 | 15.20                               |



| <b>Variant<sup>a</sup></b> | <b>Batch<sup>b</sup></b> | <b>Number Survived (HAT)<sup>c</sup></b> | <b>Total Number (M15)<sup>d</sup></b> | <b>Percent Survived<sup>e</sup></b> |
|----------------------------|--------------------------|------------------------------------------|---------------------------------------|-------------------------------------|
| L2106P                     | 41                       | 2458                                     | 13589                                 | 18.09                               |
| WT                         | 41                       | 1262                                     | 9583                                  | 13.17                               |
| S2152Y                     | 25                       | 875                                      | 10573                                 | 8.28                                |
| S2152Y                     | 25                       | 396                                      | 10916                                 | 3.63                                |
| WT                         | 25                       | 894                                      | 10118                                 | 8.84                                |
| A2786P                     | 11                       | 0                                        | 9240                                  | 0.00                                |
| A2786P                     | 11                       | 0                                        | 10448                                 | 0.00                                |
| WT                         | 11                       | 689                                      | 10233                                 | 6.73                                |
| G2793R                     | 11                       | 0                                        | 9260                                  | 0.00                                |
| G2793R                     | 11                       | 0                                        | 8069                                  | 0.00                                |
| WT                         | 11                       | 689                                      | 10233                                 | 6.73                                |
| D2611G                     | 4                        | 0                                        | 11976                                 | 0.00                                |
| D2611G                     | 4                        | 0                                        | 5986                                  | 0.00                                |
| WT                         | 4                        | 524                                      | 6514                                  | 8.04                                |
| D1781G                     | 67                       | 1741                                     | 13160                                 | 13.23                               |
| D1781G                     | 67                       | 3297                                     | 13015                                 | 25.33                               |
| WT                         | 67                       | 2788                                     | 13349                                 | 20.89                               |
| L2647P                     | 43                       | 0                                        | 9468                                  | 0.00                                |
| L2647P                     | 43                       | 0                                        | 8504                                  | 0.00                                |
| WT                         | 43                       | 1299                                     | 11217                                 | 11.58                               |
| T1302del                   | 37                       | 799                                      | 7722                                  | 10.35                               |
| T1302del                   | 37                       | 1321                                     | 5257                                  | 25.13                               |
| WT                         | 37                       | 1077                                     | 11748                                 | 9.17                                |
| M1300I+1301T del           | 37                       | 1872                                     | 9019                                  | 20.76                               |
| M1300I+1301T del           | 37                       | 1580                                     | 10718                                 | 14.74                               |
| WT                         | 37                       | 1077                                     | 11748                                 | 9.17                                |
| S2691F                     | 3                        | 0                                        | 5590                                  | 0.00                                |
| S2691F                     | 3                        | 0                                        | 5937                                  | 0.00                                |
| WT                         | 3                        | 510                                      | 6485                                  | 7.86                                |
| R2659G                     | 3                        | 0                                        | 5933                                  | 0.00                                |
| R2659G                     | 3                        | 0                                        | 6234                                  | 0.00                                |
| WT                         | 3                        | 510                                      | 6485                                  | 7.86                                |

<sup>a</sup>BRCA2 variant used in the cell survival assay (HAT)

<sup>b</sup>Batch number refers to group of variants analyzed together in one experimental with a common WT control

<sup>c</sup>Number of mES Cell colonies that survived HAT selection after Cre-mediated loss of condition allele of *Brca2*

<sup>d</sup>Total number of ES cells plated and grown in M15 media without HAT

<sup>e</sup>Percentage of mES cells expressing each variant that survived HAT selection

**SUPPLEMENTARY TABLE 3: Results of drug sensitivity (DS) assay of BRCA2 variants**

| Variant <sup>a</sup> | Batch ID <sup>b</sup> | Drug <sup>c</sup> | Concentration <sup>d</sup> | Percent Survived <sup>e</sup> | Clone ID <sup>f</sup> |
|----------------------|-----------------------|-------------------|----------------------------|-------------------------------|-----------------------|
| F266L                | B1                    | Camp              | 2.5                        | 84.51                         | 1                     |
| F266L                | B1                    | Camp              | 2.5                        | 82.17                         | 2                     |
| WT                   | B1                    | Camp              | 2.5                        | 100.00                        | 1                     |
| F266L                | B1                    | Camp              | 5                          | 82.13                         | 1                     |
| F266L                | B1                    | Camp              | 5                          | 95.68                         | 2                     |
| WT                   | B1                    | Camp              | 5                          | 100.00                        | 1                     |
| F266L                | B1                    | Camp              | 25                         | 53.22                         | 1                     |
| F266L                | B1                    | Camp              | 25                         | 60.15                         | 2                     |
| WT                   | B1                    | Camp              | 25                         | 73.79                         | 1                     |
| F266L                | B1                    | Camp              | 50                         | 30.17                         | 1                     |
| F266L                | B1                    | Camp              | 50                         | 30.86                         | 2                     |
| WT                   | B1                    | Camp              | 50                         | 37.95                         | 1                     |
| F266L                | B1                    | Camp              | 100                        | 4.60                          | 1                     |
| F266L                | B1                    | Camp              | 100                        | 5.42                          | 2                     |
| WT                   | B1                    | Camp              | 100                        | 6.89                          | 1                     |
| F266L                | B1                    | Camp              | 200                        | 2.22                          | 1                     |
| F266L                | B1                    | Camp              | 200                        | 2.06                          | 2                     |
| WT                   | B1                    | Camp              | 200                        | 3.62                          | 1                     |
| F266L                | B1                    | MMC               | 5                          | 81.20                         | 1                     |
| F266L                | B1                    | MMC               | 5                          | 81.39                         | 2                     |
| WT                   | B1                    | MMC               | 5                          | 71.98                         | 1                     |
| F266L                | B1                    | MMC               | 10                         | 61.57                         | 1                     |
| F266L                | B1                    | MMC               | 10                         | 63.11                         | 2                     |
| WT                   | B1                    | MMC               | 10                         | 53.68                         | 1                     |
| F266L                | B1                    | MMC               | 20                         | 43.39                         | 1                     |
| F266L                | B1                    | MMC               | 20                         | 49.51                         | 2                     |
| WT                   | B1                    | MMC               | 20                         | 45.21                         | 1                     |
| F266L                | B1                    | MMC               | 40                         | 32.85                         | 1                     |
| F266L                | B1                    | MMC               | 40                         | 24.11                         | 2                     |
| WT                   | B1                    | MMC               | 40                         | 32.87                         | 1                     |
| F266L                | B1                    | MMC               | 60                         | 16.53                         | 1                     |
| F266L                | B1                    | MMC               | 60                         | 14.89                         | 2                     |
| WT                   | B1                    | MMC               | 60                         | 14.84                         | 1                     |
| F266L                | B1                    | MMC               | 80                         | 21.90                         | 1                     |
| F266L                | B1                    | MMC               | 80                         | 8.09                          | 2                     |
| WT                   | B1                    | MMC               | 80                         | 14.01                         | 1                     |
| F266L                | B1                    | Cisp              | 0.2                        | 38.19                         | 1                     |
| F266L                | B1                    | Cisp              | 0.2                        | 48.29                         | 2                     |

| Variant <sup>a</sup> | Batch ID <sup>b</sup> | Drug <sup>c</sup> | Concentration <sup>d</sup> | Percent Survived <sup>e</sup> | Clone ID <sup>f</sup> |
|----------------------|-----------------------|-------------------|----------------------------|-------------------------------|-----------------------|
| WT                   | B1                    | Cisp              | 0.2                        | 51.44                         | 1                     |
| F266L                | B1                    | Cisp              | 0.4                        | 14.57                         | 1                     |
| F266L                | B1                    | Cisp              | 0.4                        | 15.69                         | 2                     |
| WT                   | B1                    | Cisp              | 0.4                        | 31.74                         | 1                     |
| F266L                | B1                    | Cisp              | 0.6                        | 9.71                          | 1                     |
| F266L                | B1                    | Cisp              | 0.6                        | 12.28                         | 2                     |
| WT                   | B1                    | Cisp              | 0.6                        | 25.09                         | 1                     |
| F266L                | B1                    | Cisp              | 1                          | 11.02                         | 1                     |
| F266L                | B1                    | Cisp              | 1                          | 6.96                          | 2                     |
| WT                   | B1                    | Cisp              | 1                          | 16.94                         | 1                     |
| F266L                | B1                    | Cisp              | 1.2                        | 8.66                          | 1                     |
| F266L                | B1                    | Cisp              | 1.2                        | 8.19                          | 2                     |
| WT                   | B1                    | Cisp              | 1.2                        | 16.31                         | 1                     |
| F266L                | B1                    | Cisp              | 1.5                        | 7.48                          | 1                     |
| F266L                | B1                    | Cisp              | 1.5                        | 3.41                          | 2                     |
| WT                   | B1                    | Cisp              | 1.5                        | 13.43                         | 1                     |
| F266L                | B1                    | MMS               | 5                          | 68.56                         | 1                     |
| F266L                | B1                    | MMS               | 5                          | 83.44                         | 2                     |
| WT                   | B1                    | MMS               | 5                          | 67.63                         | 1                     |
| F266L                | B1                    | MMS               | 10                         | 51.93                         | 1                     |
| F266L                | B1                    | MMS               | 10                         | 47.21                         | 2                     |
| WT                   | B1                    | MMS               | 10                         | 58.85                         | 1                     |
| F266L                | B1                    | MMS               | 15                         | 38.13                         | 1                     |
| F266L                | B1                    | MMS               | 15                         | 24.92                         | 2                     |
| WT                   | B1                    | MMS               | 15                         | 41.78                         | 1                     |
| F266L                | B1                    | MMS               | 20                         | 14.60                         | 1                     |
| F266L                | B1                    | MMS               | 20                         | 19.04                         | 2                     |
| WT                   | B1                    | MMS               | 20                         | 33.88                         | 1                     |
| F266L                | B1                    | MMS               | 30                         | 7.51                          | 1                     |
| F266L                | B1                    | MMS               | 30                         | 6.35                          | 2                     |
| WT                   | B1                    | MMS               | 30                         | 10.79                         | 1                     |
| F266L                | B1                    | MMS               | 40                         | 5.07                          | 1                     |
| F266L                | B1                    | MMS               | 40                         | 2.79                          | 2                     |
| WT                   | B1                    | MMS               | 40                         | 3.26                          | 1                     |
| F266L                | B1                    | Parp              | 0.01                       | 72.59                         | 1                     |
| F266L                | B1                    | Parp              | 0.01                       | 70.86                         | 2                     |
| WT                   | B1                    | Parp              | 0.01                       | 73.99                         | 1                     |
| F266L                | B1                    | Parp              | 0.1                        | 56.39                         | 1                     |
| F266L                | B1                    | Parp              | 0.1                        | 54.09                         | 2                     |
| WT                   | B1                    | Parp              | 0.1                        | 66.92                         | 1                     |

| Variant <sup>a</sup> | Batch ID <sup>b</sup> | Drug <sup>c</sup> | Concentration <sup>d</sup> | Percent Survived <sup>e</sup> | Clone ID <sup>f</sup> |
|----------------------|-----------------------|-------------------|----------------------------|-------------------------------|-----------------------|
| F266L                | B1                    | Parp              | 1                          | 18.70                         | 1                     |
| F266L                | B1                    | Parp              | 1                          | 11.75                         | 2                     |
| WT                   | B1                    | Parp              | 1                          | 24.97                         | 1                     |
| F266L                | B1                    | Parp              | 10                         | 3.54                          | 1                     |
| F266L                | B1                    | Parp              | 10                         | 2.54                          | 2                     |
| WT                   | B1                    | Parp              | 10                         | 4.72                          | 1                     |
| F266L                | B1                    | IR                | 50                         | 100.00                        | 1                     |
| F266L                | B1                    | IR                | 50                         | 95.71                         | 2                     |
| WT                   | B1                    | IR                | 50                         | 100.00                        | 1                     |
| F266L                | B1                    | IR                | 100                        | 88.61                         | 1                     |
| F266L                | B1                    | IR                | 100                        | 90.95                         | 2                     |
| WT                   | B1                    | IR                | 100                        | 90.94                         | 1                     |
| F266L                | B1                    | IR                | 200                        | 79.33                         | 1                     |
| F266L                | B1                    | IR                | 200                        | 77.25                         | 2                     |
| WT                   | B1                    | IR                | 200                        | 81.68                         | 1                     |
| F266L                | B1                    | IR                | 400                        | 58.62                         | 1                     |
| F266L                | B1                    | IR                | 400                        | 48.33                         | 2                     |
| WT                   | B1                    | IR                | 400                        | 45.14                         | 1                     |
| F266L                | B1                    | IR                | 600                        | 45.18                         | 1                     |
| F266L                | B1                    | IR                | 600                        | 42.39                         | 2                     |
| WT                   | B1                    | IR                | 600                        | 36.95                         | 1                     |
| D3064N               | B2                    | Camp              | 2.5                        | 91.59                         | 1                     |
| D3064N               | B2                    | Camp              | 2.5                        | 98.20                         | 2                     |
| WT                   | B2                    | Camp              | 2.5                        | 93.49                         | 1                     |
| D3064N               | B2                    | Camp              | 5                          | 94.98                         | 1                     |
| D3064N               | B2                    | Camp              | 5                          | 87.12                         | 2                     |
| WT                   | B2                    | Camp              | 5                          | 92.32                         | 1                     |
| D3064N               | B2                    | Camp              | 25                         | 77.29                         | 1                     |
| D3064N               | B2                    | Camp              | 25                         | 82.68                         | 2                     |
| WT                   | B2                    | Camp              | 25                         | 77.96                         | 1                     |
| D3064N               | B2                    | Camp              | 50                         | 26.31                         | 1                     |
| D3064N               | B2                    | Camp              | 50                         | 46.67                         | 2                     |
| WT                   | B2                    | Camp              | 50                         | 43.91                         | 1                     |
| D3064N               | B2                    | Camp              | 100                        | 4.26                          | 1                     |
| D3064N               | B2                    | Camp              | 100                        | 6.86                          | 2                     |
| WT                   | B2                    | Camp              | 100                        | 7.10                          | 1                     |
| D3064N               | B2                    | Camp              | 200                        | 3.49                          | 1                     |
| D3064N               | B2                    | Camp              | 200                        | 4.01                          | 2                     |
| WT                   | B2                    | Camp              | 200                        | 4.42                          | 1                     |
| D3064N               | B2                    | MMC               | 5                          | 100.00                        | 1                     |

| Variant <sup>a</sup> | Batch ID <sup>b</sup> | Drug <sup>c</sup> | Concentration <sup>d</sup> | Percent Survived <sup>e</sup> | Clone ID <sup>f</sup> |
|----------------------|-----------------------|-------------------|----------------------------|-------------------------------|-----------------------|
| D3064N               | B2                    | MMC               | 5                          | 88.33                         | 2                     |
| WT                   | B2                    | MMC               | 5                          | 97.28                         | 1                     |
| D3064N               | B2                    | MMC               | 10                         | 86.53                         | 1                     |
| D3064N               | B2                    | MMC               | 10                         | 83.64                         | 2                     |
| WT                   | B2                    | MMC               | 10                         | 92.46                         | 1                     |
| D3064N               | B2                    | MMC               | 20                         | 60.57                         | 1                     |
| D3064N               | B2                    | MMC               | 20                         | 75.35                         | 2                     |
| WT                   | B2                    | MMC               | 20                         | 77.91                         | 1                     |
| D3064N               | B2                    | MMC               | 40                         | 26.51                         | 1                     |
| D3064N               | B2                    | MMC               | 40                         | 41.55                         | 2                     |
| WT                   | B2                    | MMC               | 40                         | 44.43                         | 1                     |
| D3064N               | B2                    | MMC               | 60                         | 13.47                         | 1                     |
| D3064N               | B2                    | MMC               | 60                         | 23.23                         | 2                     |
| WT                   | B2                    | MMC               | 60                         | 25.42                         | 1                     |
| D3064N               | B2                    | MMC               | 80                         | 8.87                          | 1                     |
| D3064N               | B2                    | MMC               | 80                         | 16.47                         | 2                     |
| WT                   | B2                    | MMC               | 80                         | 17.09                         | 1                     |
| D3064N               | B2                    | Cisp              | 0.2                        | 59.89                         | 1                     |
| D3064N               | B2                    | Cisp              | 0.2                        | 61.33                         | 2                     |
| WT                   | B2                    | Cisp              | 0.2                        | 74.03                         | 1                     |
| D3064N               | B2                    | Cisp              | 0.4                        | 27.95                         | 1                     |
| D3064N               | B2                    | Cisp              | 0.4                        | 38.67                         | 2                     |
| WT                   | B2                    | Cisp              | 0.4                        | 46.00                         | 1                     |
| D3064N               | B2                    | Cisp              | 0.6                        | 18.54                         | 1                     |
| D3064N               | B2                    | Cisp              | 0.6                        | 24.38                         | 2                     |
| WT                   | B2                    | Cisp              | 0.6                        | 24.40                         | 1                     |
| D3064N               | B2                    | Cisp              | 1                          | 9.76                          | 1                     |
| D3064N               | B2                    | Cisp              | 1                          | 11.17                         | 2                     |
| WT                   | B2                    | Cisp              | 1                          | 10.22                         | 1                     |
| D3064N               | B2                    | Cisp              | 1.2                        | 8.25                          | 1                     |
| D3064N               | B2                    | Cisp              | 1.2                        | 6.34                          | 2                     |
| WT                   | B2                    | Cisp              | 1.2                        | 5.85                          | 1                     |
| D3064N               | B2                    | Cisp              | 1.5                        | 8.07                          | 1                     |
| D3064N               | B2                    | Cisp              | 1.5                        | 6.77                          | 2                     |
| WT                   | B2                    | Cisp              | 1.5                        | 5.77                          | 1                     |
| D3064N               | B2                    | MMS               | 5                          | 83.02                         | 1                     |
| D3064N               | B2                    | MMS               | 5                          | 100.00                        | 2                     |
| WT                   | B2                    | MMS               | 5                          | 91.37                         | 1                     |
| D3064N               | B2                    | MMS               | 10                         | 63.20                         | 1                     |
| D3064N               | B2                    | MMS               | 10                         | 76.55                         | 2                     |

| Variant <sup>a</sup> | Batch ID <sup>b</sup> | Drug <sup>c</sup> | Concentration <sup>d</sup> | Percent Survived <sup>e</sup> | Clone ID <sup>f</sup> |
|----------------------|-----------------------|-------------------|----------------------------|-------------------------------|-----------------------|
| WT                   | B2                    | MMS               | 10                         | 72.64                         | 1                     |
| D3064N               | B2                    | MMS               | 15                         | 41.67                         | 1                     |
| D3064N               | B2                    | MMS               | 15                         | 47.96                         | 2                     |
| WT                   | B2                    | MMS               | 15                         | 51.77                         | 1                     |
| D3064N               | B2                    | MMS               | 20                         | 25.02                         | 1                     |
| D3064N               | B2                    | MMS               | 20                         | 35.95                         | 2                     |
| WT                   | B2                    | MMS               | 20                         | 43.22                         | 1                     |
| D3064N               | B2                    | MMS               | 30                         | 9.10                          | 1                     |
| D3064N               | B2                    | MMS               | 30                         | 11.93                         | 2                     |
| WT                   | B2                    | MMS               | 30                         | 15.04                         | 1                     |
| D3064N               | B2                    | MMS               | 40                         | 3.90                          | 1                     |
| D3064N               | B2                    | MMS               | 40                         | 4.25                          | 2                     |
| WT                   | B2                    | MMS               | 40                         | 6.05                          | 1                     |
| D3064N               | B2                    | Parp              | 0.01                       | 74.33                         | 1                     |
| D3064N               | B2                    | Parp              | 0.01                       | 74.33                         | 2                     |
| WT                   | B2                    | Parp              | 0.01                       | 86.96                         | 1                     |
| D3064N               | B2                    | Parp              | 0.1                        | 63.73                         | 1                     |
| D3064N               | B2                    | Parp              | 0.1                        | 63.73                         | 2                     |
| WT                   | B2                    | Parp              | 0.1                        | 79.80                         | 1                     |
| D3064N               | B2                    | Parp              | 1                          | 23.98                         | 1                     |
| D3064N               | B2                    | Parp              | 1                          | 23.98                         | 2                     |
| WT                   | B2                    | Parp              | 1                          | 42.24                         | 1                     |
| D3064N               | B2                    | Parp              | 10                         | 6.34                          | 1                     |
| D3064N               | B2                    | Parp              | 10                         | 6.34                          | 2                     |
| WT                   | B2                    | Parp              | 10                         | 4.96                          | 1                     |
| D3064N               | B2                    | IR                | 50                         | 85.23                         | 1                     |
| D3064N               | B2                    | IR                | 50                         | 80.12                         | 2                     |
| WT                   | B2                    | IR                | 50                         | 86.10                         | 1                     |
| D3064N               | B2                    | IR                | 100                        | 82.75                         | 1                     |
| D3064N               | B2                    | IR                | 100                        | 88.10                         | 2                     |
| WT                   | B2                    | IR                | 100                        | 83.68                         | 1                     |
| D3064N               | B2                    | IR                | 200                        | 54.17                         | 1                     |
| D3064N               | B2                    | IR                | 200                        | 47.81                         | 2                     |
| WT                   | B2                    | IR                | 200                        | 61.90                         | 1                     |
| D3064N               | B2                    | IR                | 400                        | 26.17                         | 1                     |
| D3064N               | B2                    | IR                | 400                        | 28.63                         | 2                     |
| WT                   | B2                    | IR                | 400                        | 37.99                         | 1                     |
| D3064N               | B2                    | IR                | 600                        | 19.81                         | 1                     |
| D3064N               | B2                    | IR                | 600                        | 21.41                         | 2                     |
| WT                   | B2                    | IR                | 600                        | 27.69                         | 1                     |

| Variant <sup>a</sup> | Batch ID <sup>b</sup> | Drug <sup>c</sup> | Concentration <sup>d</sup> | Percent Survived <sup>e</sup> | Clone ID <sup>f</sup> |
|----------------------|-----------------------|-------------------|----------------------------|-------------------------------|-----------------------|
| H1996Y               | B3                    | Camp              | 2.5                        | 94.91                         | 1                     |
| H1996Y               | B3                    | Camp              | 2.5                        | 94.03                         | 2                     |
| WT                   | B3                    | Camp              | 2.5                        | 93.49                         | 1                     |
| H1996Y               | B3                    | Camp              | 5                          | 94.25                         | 1                     |
| H1996Y               | B3                    | Camp              | 5                          | 92.61                         | 2                     |
| WT                   | B3                    | Camp              | 5                          | 92.32                         | 1                     |
| H1996Y               | B3                    | Camp              | 25                         | 91.32                         | 1                     |
| H1996Y               | B3                    | Camp              | 25                         | 82.86                         | 2                     |
| WT                   | B3                    | Camp              | 25                         | 77.96                         | 1                     |
| H1996Y               | B3                    | Camp              | 50                         | 43.21                         | 1                     |
| H1996Y               | B3                    | Camp              | 50                         | 39.02                         | 2                     |
| WT                   | B3                    | Camp              | 50                         | 43.91                         | 1                     |
| H1996Y               | B3                    | Camp              | 100                        | 10.57                         | 1                     |
| H1996Y               | B3                    | Camp              | 100                        | 10.98                         | 2                     |
| WT                   | B3                    | Camp              | 100                        | 7.10                          | 1                     |
| H1996Y               | B3                    | Camp              | 200                        | 5.19                          | 1                     |
| H1996Y               | B3                    | Camp              | 200                        | 8.24                          | 2                     |
| WT                   | B3                    | Camp              | 200                        | 4.42                          | 1                     |
| H1996Y               | B3                    | MMC               | 5                          | 83.53                         | 1                     |
| H1996Y               | B3                    | MMC               | 5                          | 96.51                         | 2                     |
| WT                   | B3                    | MMC               | 5                          | 97.28                         | 1                     |
| H1996Y               | B3                    | MMC               | 10                         | 89.53                         | 1                     |
| H1996Y               | B3                    | MMC               | 10                         | 94.96                         | 2                     |
| WT                   | B3                    | MMC               | 10                         | 92.46                         | 1                     |
| H1996Y               | B3                    | MMC               | 20                         | 78.68                         | 1                     |
| H1996Y               | B3                    | MMC               | 20                         | 79.86                         | 2                     |
| WT                   | B3                    | MMC               | 20                         | 77.91                         | 1                     |
| H1996Y               | B3                    | MMC               | 40                         | 46.41                         | 1                     |
| H1996Y               | B3                    | MMC               | 40                         | 54.37                         | 2                     |
| WT                   | B3                    | MMC               | 40                         | 44.43                         | 1                     |
| H1996Y               | B3                    | MMC               | 60                         | 30.62                         | 1                     |
| H1996Y               | B3                    | MMC               | 60                         | 34.12                         | 2                     |
| WT                   | B3                    | MMC               | 60                         | 25.42                         | 1                     |
| H1996Y               | B3                    | MMC               | 80                         | 19.48                         | 1                     |
| H1996Y               | B3                    | MMC               | 80                         | 21.07                         | 2                     |
| WT                   | B3                    | MMC               | 80                         | 17.09                         | 1                     |
| H1996Y               | B3                    | Cisp              | 0.2                        | 70.50                         | 1                     |
| H1996Y               | B3                    | Cisp              | 0.2                        | 62.81                         | 2                     |
| WT                   | B3                    | Cisp              | 0.2                        | 74.03                         | 1                     |
| H1996Y               | B3                    | Cisp              | 0.4                        | 40.83                         | 1                     |



| Variant <sup>a</sup> | Batch ID <sup>b</sup> | Drug <sup>c</sup> | Concentration <sup>d</sup> | Percent Survived <sup>e</sup> | Clone ID <sup>f</sup> |
|----------------------|-----------------------|-------------------|----------------------------|-------------------------------|-----------------------|
| H1996Y               | B3                    | Cisp              | 0.4                        | 34.43                         | 2                     |
| WT                   | B3                    | Cisp              | 0.4                        | 46.00                         | 1                     |
| H1996Y               | B3                    | Cisp              | 0.6                        | 26.28                         | 1                     |
| H1996Y               | B3                    | Cisp              | 0.6                        | 21.62                         | 2                     |
| WT                   | B3                    | Cisp              | 0.6                        | 24.40                         | 1                     |
| H1996Y               | B3                    | Cisp              | 1                          | 13.39                         | 1                     |
| H1996Y               | B3                    | Cisp              | 1                          | 12.10                         | 2                     |
| WT                   | B3                    | Cisp              | 1                          | 10.22                         | 1                     |
| H1996Y               | B3                    | Cisp              | 1.2                        | 11.82                         | 1                     |
| H1996Y               | B3                    | Cisp              | 1.2                        | 8.63                          | 2                     |
| WT                   | B3                    | Cisp              | 1.2                        | 5.85                          | 1                     |
| H1996Y               | B3                    | Cisp              | 1.5                        | 10.00                         | 1                     |
| H1996Y               | B3                    | Cisp              | 1.5                        | 8.81                          | 2                     |
| WT                   | B3                    | Cisp              | 1.5                        | 5.77                          | 1                     |
| H1996Y               | B3                    | MMS               | 5                          | 71.31                         | 1                     |
| H1996Y               | B3                    | MMS               | 5                          | 71.31                         | 2                     |
| WT                   | B3                    | MMS               | 5                          | 77.13                         | 1                     |
| H1996Y               | B3                    | MMS               | 10                         | 52.51                         | 1                     |
| H1996Y               | B3                    | MMS               | 10                         | 52.51                         | 2                     |
| WT                   | B3                    | MMS               | 10                         | 67.58                         | 1                     |
| H1996Y               | B3                    | MMS               | 15                         | 37.40                         | 1                     |
| H1996Y               | B3                    | MMS               | 15                         | 37.40                         | 2                     |
| WT                   | B3                    | MMS               | 15                         | 53.33                         | 1                     |
| H1996Y               | B3                    | MMS               | 20                         | 20.99                         | 1                     |
| H1996Y               | B3                    | MMS               | 20                         | 20.99                         | 2                     |
| WT                   | B3                    | MMS               | 20                         | 30.68                         | 1                     |
| H1996Y               | B3                    | MMS               | 30                         | 6.61                          | 1                     |
| H1996Y               | B3                    | MMS               | 30                         | 6.61                          | 2                     |
| WT                   | B3                    | MMS               | 30                         | 11.35                         | 1                     |
| H1996Y               | B3                    | MMS               | 40                         | 2.11                          | 1                     |
| H1996Y               | B3                    | MMS               | 40                         | 2.11                          | 2                     |
| WT                   | B3                    | MMS               | 40                         | 1.47                          | 1                     |
| H1996Y               | B3                    | Parp              | 0.01                       | 86.38                         | 1                     |
| H1996Y               | B3                    | Parp              | 0.01                       | 58.84                         | 2                     |
| WT                   | B3                    | Parp              | 0.01                       | 84.61                         | 1                     |
| H1996Y               | B3                    | Parp              | 0.1                        | 70.72                         | 1                     |
| H1996Y               | B3                    | Parp              | 0.1                        | 48.44                         | 2                     |
| WT                   | B3                    | Parp              | 0.1                        | 64.90                         | 1                     |
| H1996Y               | B3                    | Parp              | 1                          | 40.19                         | 1                     |
| H1996Y               | B3                    | Parp              | 1                          | 28.87                         | 2                     |

| Variant <sup>a</sup> | Batch ID <sup>b</sup> | Drug <sup>c</sup> | Concentration <sup>d</sup> | Percent Survived <sup>e</sup> | Clone ID <sup>f</sup> |
|----------------------|-----------------------|-------------------|----------------------------|-------------------------------|-----------------------|
| WT                   | B3                    | Parp              | 1                          | 31.16                         | 1                     |
| H1996Y               | B3                    | Parp              | 10                         | 3.90                          | 1                     |
| H1996Y               | B3                    | Parp              | 10                         | 4.55                          | 2                     |
| WT                   | B3                    | Parp              | 10                         | 4.48                          | 1                     |
| H1996Y               | B3                    | IR                | 50                         | 82.59                         | 1                     |
| H1996Y               | B3                    | IR                | 50                         | 80.27                         | 2                     |
| WT                   | B3                    | IR                | 50                         | 86.10                         | 1                     |
| H1996Y               | B3                    | IR                | 100                        | 87.65                         | 1                     |
| H1996Y               | B3                    | IR                | 100                        | 76.76                         | 2                     |
| WT                   | B3                    | IR                | 100                        | 83.68                         | 1                     |
| H1996Y               | B3                    | IR                | 200                        | 54.33                         | 1                     |
| H1996Y               | B3                    | IR                | 200                        | 57.91                         | 2                     |
| WT                   | B3                    | IR                | 200                        | 61.90                         | 1                     |
| H1996Y               | B3                    | IR                | 400                        | 41.98                         | 1                     |
| H1996Y               | B3                    | IR                | 400                        | 36.01                         | 2                     |
| WT                   | B3                    | IR                | 400                        | 37.99                         | 1                     |
| H1996Y               | B3                    | IR                | 600                        | 26.55                         | 1                     |
| H1996Y               | B3                    | IR                | 600                        | 22.64                         | 2                     |
| WT                   | B3                    | IR                | 600                        | 27.69                         | 1                     |
| D3073G               | B4                    | Camp              | 2.5                        | 86.09                         | 1                     |
| D3073G               | B4                    | Camp              | 2.5                        | 73.68                         | 2                     |
| WT                   | B4                    | Camp              | 2.5                        | 100.00                        | 1                     |
| D3073G               | B4                    | Camp              | 5                          | 80.26                         | 1                     |
| D3073G               | B4                    | Camp              | 5                          | 50.79                         | 2                     |
| WT                   | B4                    | Camp              | 5                          | 100.00                        | 1                     |
| D3073G               | B4                    | Camp              | 25                         | 22.38                         | 1                     |
| D3073G               | B4                    | Camp              | 25                         | 12.16                         | 2                     |
| WT                   | B4                    | Camp              | 25                         | 73.79                         | 1                     |
| D3073G               | B4                    | Camp              | 50                         | 14.57                         | 1                     |
| D3073G               | B4                    | Camp              | 50                         | 14.31                         | 2                     |
| WT                   | B4                    | Camp              | 50                         | 37.95                         | 1                     |
| D3073G               | B4                    | Camp              | 100                        | 13.25                         | 1                     |
| D3073G               | B4                    | Camp              | 100                        | 16.17                         | 2                     |
| WT                   | B4                    | Camp              | 100                        | 6.89                          | 1                     |
| D3073G               | B4                    | Camp              | 200                        | 14.70                         | 1                     |
| D3073G               | B4                    | Camp              | 200                        | 12.30                         | 2                     |
| WT                   | B4                    | Camp              | 200                        | 3.62                          | 1                     |
| D3073G               | B4                    | MMC               | 5                          | 63.64                         | 1                     |
| D3073G               | B4                    | MMC               | 5                          | 38.88                         | 2                     |
| WT                   | B4                    | MMC               | 5                          | 82.50                         | 1                     |

| Variant <sup>a</sup> | Batch ID <sup>b</sup> | Drug <sup>c</sup> | Concentration <sup>d</sup> | Percent Survived <sup>e</sup> | Clone ID <sup>f</sup> |
|----------------------|-----------------------|-------------------|----------------------------|-------------------------------|-----------------------|
| D3073G               | B4                    | MMC               | 10                         | 41.04                         | 1                     |
| D3073G               | B4                    | MMC               | 10                         | 20.11                         | 2                     |
| WT                   | B4                    | MMC               | 10                         | 72.70                         | 1                     |
| D3073G               | B4                    | MMC               | 20                         | 24.57                         | 1                     |
| D3073G               | B4                    | MMC               | 20                         | 15.04                         | 2                     |
| WT                   | B4                    | MMC               | 20                         | 59.24                         | 1                     |
| D3073G               | B4                    | MMC               | 40                         | 15.61                         | 1                     |
| D3073G               | B4                    | MMC               | 40                         | 12.59                         | 2                     |
| WT                   | B4                    | MMC               | 40                         | 34.54                         | 1                     |
| D3073G               | B4                    | MMC               | 60                         | 12.98                         | 1                     |
| D3073G               | B4                    | MMC               | 60                         | 10.69                         | 2                     |
| WT                   | B4                    | MMC               | 60                         | 18.34                         | 1                     |
| D3073G               | B4                    | MMC               | 80                         | 8.83                          | 1                     |
| D3073G               | B4                    | MMC               | 80                         | 10.53                         | 2                     |
| WT                   | B4                    | MMC               | 80                         | 8.17                          | 1                     |
| D3073G               | B4                    | Cisp              | 0.2                        | 47.78                         | 1                     |
| D3073G               | B4                    | Cisp              | 0.2                        | 27.26                         | 2                     |
| WT                   | B4                    | Cisp              | 0.2                        | 80.27                         | 1                     |
| D3073G               | B4                    | Cisp              | 0.4                        | 22.66                         | 1                     |
| D3073G               | B4                    | Cisp              | 0.4                        | 14.45                         | 2                     |
| WT                   | B4                    | Cisp              | 0.4                        | 57.26                         | 1                     |
| D3073G               | B4                    | Cisp              | 0.6                        | 17.20                         | 1                     |
| D3073G               | B4                    | Cisp              | 0.6                        | 11.78                         | 2                     |
| WT                   | B4                    | Cisp              | 0.6                        | 44.13                         | 1                     |
| D3073G               | B4                    | Cisp              | 1                          | 15.29                         | 1                     |
| D3073G               | B4                    | Cisp              | 1                          | 12.33                         | 2                     |
| WT                   | B4                    | Cisp              | 1                          | 26.50                         | 1                     |
| D3073G               | B4                    | Cisp              | 1.2                        | 13.72                         | 1                     |
| D3073G               | B4                    | Cisp              | 1.2                        | 11.63                         | 2                     |
| WT                   | B4                    | Cisp              | 1.2                        | 17.94                         | 1                     |
| D3073G               | B4                    | Cisp              | 1.5                        | 13.38                         | 1                     |
| D3073G               | B4                    | Cisp              | 1.5                        | 11.08                         | 2                     |
| WT                   | B4                    | Cisp              | 1.5                        | 12.06                         | 1                     |
| D3073G               | B4                    | MMS               | 5                          | 61.38                         | 1                     |
| D3073G               | B4                    | MMS               | 5                          | 42.72                         | 2                     |
| WT                   | B4                    | MMS               | 5                          | 88.28                         | 1                     |
| D3073G               | B4                    | MMS               | 10                         | 25.11                         | 1                     |
| D3073G               | B4                    | MMS               | 10                         | 13.69                         | 2                     |
| WT                   | B4                    | MMS               | 10                         | 66.47                         | 1                     |
| D3073G               | B4                    | MMS               | 15                         | 11.21                         | 1                     |

| Variant <sup>a</sup> | Batch ID <sup>b</sup> | Drug <sup>c</sup> | Concentration <sup>d</sup> | Percent Survived <sup>e</sup> | Clone ID <sup>f</sup> |
|----------------------|-----------------------|-------------------|----------------------------|-------------------------------|-----------------------|
| D3073G               | B4                    | MMS               | 15                         | 9.34                          | 2                     |
| WT                   | B4                    | MMS               | 15                         | 49.07                         | 1                     |
| D3073G               | B4                    | MMS               | 20                         | 8.92                          | 1                     |
| D3073G               | B4                    | MMS               | 20                         | 6.80                          | 2                     |
| WT                   | B4                    | MMS               | 20                         | 37.35                         | 1                     |
| D3073G               | B4                    | MMS               | 30                         | 5.38                          | 1                     |
| D3073G               | B4                    | MMS               | 30                         | 5.46                          | 2                     |
| WT                   | B4                    | MMS               | 30                         | 11.21                         | 1                     |
| D3073G               | B4                    | MMS               | 40                         | 3.15                          | 1                     |
| D3073G               | B4                    | MMS               | 40                         | 3.72                          | 2                     |
| WT                   | B4                    | MMS               | 40                         | 3.35                          | 1                     |
| D3073G               | B4                    | Parp              | 0.01                       | 47.62                         | 1                     |
| D3073G               | B4                    | Parp              | 0.01                       | 24.66                         | 2                     |
| WT                   | B4                    | Parp              | 0.01                       | 92.46                         | 1                     |
| D3073G               | B4                    | Parp              | 0.1                        | 15.90                         | 1                     |
| D3073G               | B4                    | Parp              | 0.1                        | 8.65                          | 2                     |
| WT                   | B4                    | Parp              | 0.1                        | 66.50                         | 1                     |
| D3073G               | B4                    | Parp              | 1                          | 12.16                         | 1                     |
| D3073G               | B4                    | Parp              | 1                          | 9.20                          | 2                     |
| WT                   | B4                    | Parp              | 1                          | 49.84                         | 1                     |
| D3073G               | B4                    | Parp              | 10                         | 10.87                         | 1                     |
| D3073G               | B4                    | Parp              | 10                         | 8.65                          | 2                     |
| WT                   | B4                    | Parp              | 10                         | 3.79                          | 1                     |
| D3073G               | B4                    | IR                | 50                         | 91.62                         | 1                     |
| D3073G               | B4                    | IR                | 50                         | 85.15                         | 2                     |
| WT                   | B4                    | IR                | 50                         | 100.00                        | 1                     |
| D3073G               | B4                    | IR                | 100                        | 77.54                         | 1                     |
| D3073G               | B4                    | IR                | 100                        | 69.21                         | 2                     |
| WT                   | B4                    | IR                | 100                        | 90.94                         | 1                     |
| D3073G               | B4                    | IR                | 200                        | 52.32                         | 1                     |
| D3073G               | B4                    | IR                | 200                        | 37.84                         | 2                     |
| WT                   | B4                    | IR                | 200                        | 81.68                         | 1                     |
| D3073G               | B4                    | IR                | 400                        | 27.50                         | 1                     |
| D3073G               | B4                    | IR                | 400                        | 25.23                         | 2                     |
| WT                   | B4                    | IR                | 400                        | 45.14                         | 1                     |
| D3073G               | B4                    | IR                | 600                        | 22.05                         | 1                     |
| D3073G               | B4                    | IR                | 600                        | 23.07                         | 2                     |
| WT                   | B4                    | IR                | 600                        | 36.95                         | 1                     |
| V2739I               | B5                    | Camp              | 2.5                        | 100.00                        | 1                     |
| V2739I               | B5                    | Camp              | 2.5                        | 94.60                         | 2                     |

| Variant <sup>a</sup> | Batch ID <sup>b</sup> | Drug <sup>c</sup> | Concentration <sup>d</sup> | Percent Survived <sup>e</sup> | Clone ID <sup>f</sup> |
|----------------------|-----------------------|-------------------|----------------------------|-------------------------------|-----------------------|
| WT                   | B5                    | Camp              | 2.5                        | 100.00                        | 1                     |
| V2739I               | B5                    | Camp              | 5                          | 98.39                         | 1                     |
| V2739I               | B5                    | Camp              | 5                          | 100.00                        | 2                     |
| WT                   | B5                    | Camp              | 5                          | 100.00                        | 1                     |
| V2739I               | B5                    | Camp              | 25                         | 100.00                        | 1                     |
| V2739I               | B5                    | Camp              | 25                         | 100.00                        | 2                     |
| WT                   | B5                    | Camp              | 25                         | 100.00                        | 1                     |
| V2739I               | B5                    | Camp              | 50                         | 79.93                         | 1                     |
| V2739I               | B5                    | Camp              | 50                         | 76.91                         | 2                     |
| WT                   | B5                    | Camp              | 50                         | 100.00                        | 1                     |
| V2739I               | B5                    | Camp              | 100                        | 22.18                         | 1                     |
| V2739I               | B5                    | Camp              | 100                        | 25.34                         | 2                     |
| WT                   | B5                    | Camp              | 100                        | 24.49                         | 1                     |
| V2739I               | B5                    | Camp              | 200                        | 5.33                          | 1                     |
| V2739I               | B5                    | Camp              | 200                        | 4.95                          | 2                     |
| WT                   | B5                    | Camp              | 200                        | 8.99                          | 1                     |
| V2739I               | B5                    | MMC               | 5                          | 73.06                         | 1                     |
| V2739I               | B5                    | MMC               | 5                          | 95.08                         | 2                     |
| WT                   | B5                    | MMC               | 5                          | 75.29                         | 1                     |
| V2739I               | B5                    | MMC               | 10                         | 71.90                         | 1                     |
| V2739I               | B5                    | MMC               | 10                         | 57.20                         | 2                     |
| WT                   | B5                    | MMC               | 10                         | 62.74                         | 1                     |
| V2739I               | B5                    | MMC               | 20                         | 49.10                         | 1                     |
| V2739I               | B5                    | MMC               | 20                         | 45.51                         | 2                     |
| WT                   | B5                    | MMC               | 20                         | 52.89                         | 1                     |
| V2739I               | B5                    | MMC               | 40                         | 19.41                         | 1                     |
| V2739I               | B5                    | MMC               | 40                         | 19.31                         | 2                     |
| WT                   | B5                    | MMC               | 40                         | 23.94                         | 1                     |
| V2739I               | B5                    | MMC               | 60                         | 7.64                          | 1                     |
| V2739I               | B5                    | MMC               | 60                         | 5.04                          | 2                     |
| WT                   | B5                    | MMC               | 60                         | 11.62                         | 1                     |
| V2739I               | B5                    | MMC               | 80                         | 4.45                          | 1                     |
| V2739I               | B5                    | MMC               | 80                         | 5.66                          | 2                     |
| WT                   | B5                    | MMC               | 80                         | 7.62                          | 1                     |
| V2739I               | B5                    | Cisp              | 0.2                        | 28.81                         | 1                     |
| V2739I               | B5                    | Cisp              | 0.2                        | 25.11                         | 2                     |
| WT                   | B5                    | Cisp              | 0.2                        | 26.13                         | 1                     |
| V2739I               | B5                    | Cisp              | 0.4                        | 12.15                         | 1                     |
| V2739I               | B5                    | Cisp              | 0.4                        | 8.16                          | 2                     |
| WT                   | B5                    | Cisp              | 0.4                        | 7.09                          | 1                     |

| Variant <sup>a</sup> | Batch ID <sup>b</sup> | Drug <sup>c</sup> | Concentration <sup>d</sup> | Percent Survived <sup>e</sup> | Clone ID <sup>f</sup> |
|----------------------|-----------------------|-------------------|----------------------------|-------------------------------|-----------------------|
| V2739I               | B5                    | Cisp              | 0.6                        | 3.81                          | 1                     |
| V2739I               | B5                    | Cisp              | 0.6                        | 2.97                          | 2                     |
| WT                   | B5                    | Cisp              | 0.6                        | 3.55                          | 1                     |
| V2739I               | B5                    | Cisp              | 1                          | 1.86                          | 1                     |
| V2739I               | B5                    | Cisp              | 1                          | 2.01                          | 2                     |
| WT                   | B5                    | Cisp              | 1                          | 3.14                          | 1                     |
| V2739I               | B5                    | Cisp              | 1.2                        | 1.24                          | 1                     |
| V2739I               | B5                    | Cisp              | 1.2                        | 1.17                          | 2                     |
| WT                   | B5                    | Cisp              | 1.2                        | 2.05                          | 1                     |
| V2739I               | B5                    | Cisp              | 1.5                        | 1.77                          | 1                     |
| V2739I               | B5                    | Cisp              | 1.5                        | 2.54                          | 2                     |
| WT                   | B5                    | Cisp              | 1.5                        | 2.25                          | 1                     |
| V2739I               | B5                    | MMS               | 5                          | 99.57                         | 1                     |
| V2739I               | B5                    | MMS               | 5                          | 100.00                        | 2                     |
| WT                   | B5                    | MMS               | 5                          | 84.62                         | 1                     |
| V2739I               | B5                    | MMS               | 10                         | 91.66                         | 1                     |
| V2739I               | B5                    | MMS               | 10                         | 100.00                        | 2                     |
| WT                   | B5                    | MMS               | 10                         | 96.24                         | 1                     |
| V2739I               | B5                    | MMS               | 15                         | 89.41                         | 1                     |
| V2739I               | B5                    | MMS               | 15                         | 91.26                         | 2                     |
| WT                   | B5                    | MMS               | 15                         | 85.07                         | 1                     |
| V2739I               | B5                    | MMS               | 20                         | 70.80                         | 1                     |
| V2739I               | B5                    | MMS               | 20                         | 74.45                         | 2                     |
| WT                   | B5                    | MMS               | 20                         | 73.34                         | 1                     |
| V2739I               | B5                    | MMS               | 30                         | 27.06                         | 1                     |
| V2739I               | B5                    | MMS               | 30                         | 33.12                         | 2                     |
| WT                   | B5                    | MMS               | 30                         | 28.98                         | 1                     |
| V2739I               | B5                    | MMS               | 40                         | 9.09                          | 1                     |
| V2739I               | B5                    | MMS               | 40                         | 13.17                         | 2                     |
| WT                   | B5                    | MMS               | 40                         | 12.61                         | 1                     |
| V2739I               | B5                    | Parp              | 0.01                       | 86.83                         | 1                     |
| V2739I               | B5                    | Parp              | 0.01                       | 81.42                         | 2                     |
| WT                   | B5                    | Parp              | 0.01                       | 93.33                         | 1                     |
| V2739I               | B5                    | Parp              | 0.1                        | 75.14                         | 1                     |
| V2739I               | B5                    | Parp              | 0.1                        | 70.52                         | 2                     |
| WT                   | B5                    | Parp              | 0.1                        | 79.98                         | 1                     |
| V2739I               | B5                    | Parp              | 1                          | 32.14                         | 1                     |
| V2739I               | B5                    | Parp              | 1                          | 35.37                         | 2                     |
| WT                   | B5                    | Parp              | 1                          | 44.35                         | 1                     |
| V2739I               | B5                    | Parp              | 10                         | 9.85                          | 1                     |

| Variant <sup>a</sup> | Batch ID <sup>b</sup> | Drug <sup>c</sup> | Concentration <sup>d</sup> | Percent Survived <sup>e</sup> | Clone ID <sup>f</sup> |
|----------------------|-----------------------|-------------------|----------------------------|-------------------------------|-----------------------|
| V2739I               | B5                    | Parp              | 10                         | 9.79                          | 2                     |
| WT                   | B5                    | Parp              | 10                         | 6.67                          | 1                     |
| V2739I               | B5                    | IR                | 50                         | 97.60                         | 1                     |
| V2739I               | B5                    | IR                | 50                         | 86.18                         | 2                     |
| WT                   | B5                    | IR                | 50                         | 89.24                         | 1                     |
| V2739I               | B5                    | IR                | 100                        | 65.18                         | 1                     |
| V2739I               | B5                    | IR                | 100                        | 68.50                         | 2                     |
| WT                   | B5                    | IR                | 100                        | 76.02                         | 1                     |
| V2739I               | B5                    | IR                | 200                        | 39.21                         | 1                     |
| V2739I               | B5                    | IR                | 200                        | 45.49                         | 2                     |
| WT                   | B5                    | IR                | 200                        | 52.79                         | 1                     |
| V2739I               | B5                    | IR                | 400                        | 19.60                         | 1                     |
| V2739I               | B5                    | IR                | 400                        | 27.21                         | 2                     |
| WT                   | B5                    | IR                | 400                        | 26.16                         | 1                     |
| V2739I               | B5                    | IR                | 600                        | 14.81                         | 1                     |
| V2739I               | B5                    | IR                | 600                        | 18.45                         | 2                     |
| WT                   | B5                    | IR                | 600                        | 17.85                         | 1                     |
| Q3066E               | B6                    | Camp              | 2.5                        | 90.88                         | 1                     |
| Q3066E               | B6                    | Camp              | 2.5                        | 94.94                         | 2                     |
| WT                   | B6                    | Camp              | 2.5                        | 100.00                        | 1                     |
| Q3066E               | B6                    | Camp              | 5                          | 100.00                        | 1                     |
| Q3066E               | B6                    | Camp              | 5                          | 83.42                         | 2                     |
| WT                   | B6                    | Camp              | 5                          | 92.54                         | 1                     |
| Q3066E               | B6                    | Camp              | 25                         | 87.80                         | 1                     |
| Q3066E               | B6                    | Camp              | 25                         | 69.48                         | 2                     |
| WT                   | B6                    | Camp              | 25                         | 74.05                         | 1                     |
| Q3066E               | B6                    | Camp              | 50                         | 55.92                         | 1                     |
| Q3066E               | B6                    | Camp              | 50                         | 47.76                         | 2                     |
| WT                   | B6                    | Camp              | 50                         | 47.17                         | 1                     |
| Q3066E               | B6                    | Camp              | 100                        | 13.71                         | 1                     |
| Q3066E               | B6                    | Camp              | 100                        | 5.06                          | 2                     |
| WT                   | B6                    | Camp              | 100                        | 15.25                         | 1                     |
| Q3066E               | B6                    | Camp              | 200                        | 2.44                          | 1                     |
| Q3066E               | B6                    | Camp              | 200                        | 1.00                          | 2                     |
| WT                   | B6                    | Camp              | 200                        | 6.25                          | 1                     |
| Q3066E               | B6                    | MMC               | 5                          | 100.00                        | 1                     |
| Q3066E               | B6                    | MMC               | 5                          | 89.74                         | 2                     |
| WT                   | B6                    | MMC               | 5                          | 92.58                         | 1                     |
| Q3066E               | B6                    | MMC               | 10                         | 93.50                         | 1                     |
| Q3066E               | B6                    | MMC               | 10                         | 91.51                         | 2                     |

| Variant <sup>a</sup> | Batch ID <sup>b</sup> | Drug <sup>c</sup> | Concentration <sup>d</sup> | Percent Survived <sup>e</sup> | Clone ID <sup>f</sup> |
|----------------------|-----------------------|-------------------|----------------------------|-------------------------------|-----------------------|
| WT                   | B6                    | MMC               | 10                         | 97.62                         | 1                     |
| Q3066E               | B6                    | MMC               | 20                         | 99.33                         | 1                     |
| Q3066E               | B6                    | MMC               | 20                         | 80.37                         | 2                     |
| WT                   | B6                    | MMC               | 20                         | 86.32                         | 1                     |
| Q3066E               | B6                    | MMC               | 40                         | 63.68                         | 1                     |
| Q3066E               | B6                    | MMC               | 40                         | 55.37                         | 2                     |
| WT                   | B6                    | MMC               | 40                         | 69.03                         | 1                     |
| Q3066E               | B6                    | MMC               | 60                         | 36.77                         | 1                     |
| Q3066E               | B6                    | MMC               | 60                         | 27.72                         | 2                     |
| WT                   | B6                    | MMC               | 60                         | 43.27                         | 1                     |
| Q3066E               | B6                    | MMC               | 80                         | 22.50                         | 1                     |
| Q3066E               | B6                    | MMC               | 80                         | 20.45                         | 2                     |
| WT                   | B6                    | MMC               | 80                         | 26.93                         | 1                     |
| Q3066E               | B6                    | Cisp              | 0.2                        | 80.30                         | 1                     |
| Q3066E               | B6                    | Cisp              | 0.2                        | 76.80                         | 2                     |
| WT                   | B6                    | Cisp              | 0.2                        | 73.01                         | 1                     |
| Q3066E               | B6                    | Cisp              | 0.4                        | 48.02                         | 1                     |
| Q3066E               | B6                    | Cisp              | 0.4                        | 43.67                         | 2                     |
| WT                   | B6                    | Cisp              | 0.4                        | 42.12                         | 1                     |
| Q3066E               | B6                    | Cisp              | 0.6                        | 30.27                         | 1                     |
| Q3066E               | B6                    | Cisp              | 0.6                        | 25.17                         | 2                     |
| WT                   | B6                    | Cisp              | 0.6                        | 31.36                         | 1                     |
| Q3066E               | B6                    | Cisp              | 1                          | 16.89                         | 1                     |
| Q3066E               | B6                    | Cisp              | 1                          | 12.45                         | 2                     |
| WT                   | B6                    | Cisp              | 1                          | 18.93                         | 1                     |
| Q3066E               | B6                    | Cisp              | 1.2                        | 11.14                         | 1                     |
| Q3066E               | B6                    | Cisp              | 1.2                        | 10.68                         | 2                     |
| WT                   | B6                    | Cisp              | 1.2                        | 14.21                         | 1                     |
| Q3066E               | B6                    | Cisp              | 1.5                        | 10.64                         | 1                     |
| Q3066E               | B6                    | Cisp              | 1.5                        | 9.12                          | 2                     |
| WT                   | B6                    | Cisp              | 1.5                        | 11.85                         | 1                     |
| Q3066E               | B6                    | MMS               | 5                          | 100.00                        | 1                     |
| Q3066E               | B6                    | MMS               | 5                          | 96.98                         | 2                     |
| WT                   | B6                    | MMS               | 5                          | 94.24                         | 1                     |
| Q3066E               | B6                    | MMS               | 10                         | 100.00                        | 1                     |
| Q3066E               | B6                    | MMS               | 10                         | 94.87                         | 2                     |
| WT                   | B6                    | MMS               | 10                         | 76.70                         | 1                     |
| Q3066E               | B6                    | MMS               | 15                         | 100.00                        | 1                     |
| Q3066E               | B6                    | MMS               | 15                         | 93.04                         | 2                     |
| WT                   | B6                    | MMS               | 15                         | 71.84                         | 1                     |



| Variant <sup>a</sup> | Batch ID <sup>b</sup> | Drug <sup>c</sup> | Concentration <sup>d</sup> | Percent Survived <sup>e</sup> | Clone ID <sup>f</sup> |
|----------------------|-----------------------|-------------------|----------------------------|-------------------------------|-----------------------|
| Q3066E               | B6                    | MMS               | 20                         | 98.54                         | 1                     |
| Q3066E               | B6                    | MMS               | 20                         | 74.07                         | 2                     |
| WT                   | B6                    | MMS               | 20                         | 64.18                         | 1                     |
| Q3066E               | B6                    | MMS               | 30                         | 38.59                         | 1                     |
| Q3066E               | B6                    | MMS               | 30                         | 25.65                         | 2                     |
| WT                   | B6                    | MMS               | 30                         | 19.39                         | 1                     |
| Q3066E               | B6                    | MMS               | 40                         | 11.22                         | 1                     |
| Q3066E               | B6                    | MMS               | 40                         | 7.94                          | 2                     |
| WT                   | B6                    | MMS               | 40                         | 6.23                          | 1                     |
| Q3066E               | B6                    | Parp              | 0.01                       | 91.68                         | 1                     |
| Q3066E               | B6                    | Parp              | 0.01                       | 93.97                         | 2                     |
| WT                   | B6                    | Parp              | 0.01                       | 93.33                         | 1                     |
| Q3066E               | B6                    | Parp              | 0.1                        | 95.03                         | 1                     |
| Q3066E               | B6                    | Parp              | 0.1                        | 91.57                         | 2                     |
| WT                   | B6                    | Parp              | 0.1                        | 79.98                         | 1                     |
| Q3066E               | B6                    | Parp              | 1                          | 52.08                         | 1                     |
| Q3066E               | B6                    | Parp              | 1                          | 70.21                         | 2                     |
| WT                   | B6                    | Parp              | 1                          | 44.35                         | 1                     |
| Q3066E               | B6                    | Parp              | 10                         | 5.48                          | 1                     |
| Q3066E               | B6                    | Parp              | 10                         | 10.92                         | 2                     |
| WT                   | B6                    | Parp              | 10                         | 6.67                          | 1                     |
| Q3066E               | B6                    | IR                | 50                         | 81.77                         | 1                     |
| Q3066E               | B6                    | IR                | 50                         | 85.86                         | 2                     |
| WT                   | B6                    | IR                | 50                         | 89.24                         | 1                     |
| Q3066E               | B6                    | IR                | 100                        | 70.90                         | 1                     |
| Q3066E               | B6                    | IR                | 100                        | 77.89                         | 2                     |
| WT                   | B6                    | IR                | 100                        | 76.02                         | 1                     |
| Q3066E               | B6                    | IR                | 200                        | 61.71                         | 1                     |
| Q3066E               | B6                    | IR                | 200                        | 61.02                         | 2                     |
| WT                   | B6                    | IR                | 200                        | 52.79                         | 1                     |
| Q3066E               | B6                    | IR                | 400                        | 28.05                         | 1                     |
| Q3066E               | B6                    | IR                | 400                        | 28.72                         | 2                     |
| WT                   | B6                    | IR                | 400                        | 26.16                         | 1                     |
| Q3066E               | B6                    | IR                | 600                        | 19.57                         | 1                     |
| Q3066E               | B6                    | IR                | 600                        | 18.88                         | 2                     |
| WT                   | B6                    | IR                | 600                        | 17.85                         | 1                     |
| D3064Y               | B7                    | Camp              | 2.5                        | 96.29                         | 1                     |
| D3064Y               | B7                    | Camp              | 2.5                        | 91.99                         | 2                     |
| WT                   | B7                    | Camp              | 2.5                        | 100.00                        | 1                     |
| D3064Y               | B7                    | Camp              | 5                          | 100.00                        | 1                     |

| Variant <sup>a</sup> | Batch ID <sup>b</sup> | Drug <sup>c</sup> | Concentration <sup>d</sup> | Percent Survived <sup>e</sup> | Clone ID <sup>f</sup> |
|----------------------|-----------------------|-------------------|----------------------------|-------------------------------|-----------------------|
| D3064Y               | B7                    | Camp              | 5                          | 86.88                         | 2                     |
| WT                   | B7                    | Camp              | 5                          | 93.77                         | 1                     |
| D3064Y               | B7                    | Camp              | 25                         | 75.07                         | 1                     |
| D3064Y               | B7                    | Camp              | 25                         | 66.17                         | 2                     |
| WT                   | B7                    | Camp              | 25                         | 72.34                         | 1                     |
| D3064Y               | B7                    | Camp              | 50                         | 37.99                         | 1                     |
| D3064Y               | B7                    | Camp              | 50                         | 36.56                         | 2                     |
| WT                   | B7                    | Camp              | 50                         | 49.27                         | 1                     |
| D3064Y               | B7                    | Camp              | 100                        | 18.68                         | 1                     |
| D3064Y               | B7                    | Camp              | 100                        | 25.10                         | 2                     |
| WT                   | B7                    | Camp              | 100                        | 8.61                          | 1                     |
| D3064Y               | B7                    | Camp              | 200                        | 17.73                         | 1                     |
| D3064Y               | B7                    | Camp              | 200                        | 20.24                         | 2                     |
| WT                   | B7                    | Camp              | 200                        | 10.07                         | 1                     |
| D3064Y               | B7                    | MMC               | 5                          | 59.12                         | 1                     |
| D3064Y               | B7                    | MMC               | 5                          | 68.00                         | 2                     |
| WT                   | B7                    | MMC               | 5                          | 71.98                         | 1                     |
| D3064Y               | B7                    | MMC               | 10                         | 60.69                         | 1                     |
| D3064Y               | B7                    | MMC               | 10                         | 29.50                         | 2                     |
| WT                   | B7                    | MMC               | 10                         | 53.68                         | 1                     |
| D3064Y               | B7                    | MMC               | 20                         | 57.23                         | 1                     |
| D3064Y               | B7                    | MMC               | 20                         | 53.25                         | 2                     |
| WT                   | B7                    | MMC               | 20                         | 45.21                         | 1                     |
| D3064Y               | B7                    | MMC               | 40                         | 25.79                         | 1                     |
| D3064Y               | B7                    | MMC               | 40                         | 19.75                         | 2                     |
| WT                   | B7                    | MMC               | 40                         | 32.87                         | 1                     |
| D3064Y               | B7                    | MMC               | 60                         | 28.30                         | 1                     |
| D3064Y               | B7                    | MMC               | 60                         | 15.25                         | 2                     |
| WT                   | B7                    | MMC               | 60                         | 14.84                         | 1                     |
| D3064Y               | B7                    | MMC               | 80                         | 17.92                         | 1                     |
| D3064Y               | B7                    | MMC               | 80                         | 11.00                         | 2                     |
| WT                   | B7                    | MMC               | 80                         | 14.01                         | 1                     |
| D3064Y               | B7                    | Cisp              | 0.2                        | 48.20                         | 1                     |
| D3064Y               | B7                    | Cisp              | 0.2                        | 53.10                         | 2                     |
| WT                   | B7                    | Cisp              | 0.2                        | 51.44                         | 1                     |
| D3064Y               | B7                    | Cisp              | 0.4                        | 19.66                         | 1                     |
| D3064Y               | B7                    | Cisp              | 0.4                        | 33.21                         | 2                     |
| WT                   | B7                    | Cisp              | 0.4                        | 31.74                         | 1                     |
| D3064Y               | B7                    | Cisp              | 0.6                        | 20.08                         | 1                     |
| D3064Y               | B7                    | Cisp              | 0.6                        | 22.45                         | 2                     |

| Variant <sup>a</sup> | Batch ID <sup>b</sup> | Drug <sup>c</sup> | Concentration <sup>d</sup> | Percent Survived <sup>e</sup> | Clone ID <sup>f</sup> |
|----------------------|-----------------------|-------------------|----------------------------|-------------------------------|-----------------------|
| WT                   | B7                    | Cisp              | 0.6                        | 25.09                         | 1                     |
| D3064Y               | B7                    | Cisp              | 1                          | 10.36                         | 1                     |
| D3064Y               | B7                    | Cisp              | 1                          | 9.31                          | 2                     |
| WT                   | B7                    | Cisp              | 1                          | 16.94                         | 1                     |
| D3064Y               | B7                    | Cisp              | 1.2                        | 17.76                         | 1                     |
| D3064Y               | B7                    | Cisp              | 1.2                        | 12.77                         | 2                     |
| WT                   | B7                    | Cisp              | 1.2                        | 16.31                         | 1                     |
| D3064Y               | B7                    | Cisp              | 1.5                        | 11.84                         | 1                     |
| D3064Y               | B7                    | Cisp              | 1.5                        | 13.87                         | 2                     |
| WT                   | B7                    | Cisp              | 1.5                        | 13.43                         | 1                     |
| D3064Y               | B7                    | MMS               | 5                          | 58.25                         | 1                     |
| D3064Y               | B7                    | MMS               | 5                          | 84.71                         | 2                     |
| WT                   | B7                    | MMS               | 5                          | 67.63                         | 1                     |
| D3064Y               | B7                    | MMS               | 10                         | 46.28                         | 1                     |
| D3064Y               | B7                    | MMS               | 10                         | 47.11                         | 2                     |
| WT                   | B7                    | MMS               | 10                         | 58.85                         | 1                     |
| D3064Y               | B7                    | MMS               | 15                         | 41.75                         | 1                     |
| D3064Y               | B7                    | MMS               | 15                         | 41.74                         | 2                     |
| WT                   | B7                    | MMS               | 15                         | 41.78                         | 1                     |
| D3064Y               | B7                    | MMS               | 20                         | 37.22                         | 1                     |
| D3064Y               | B7                    | MMS               | 20                         | 22.73                         | 2                     |
| WT                   | B7                    | MMS               | 20                         | 33.88                         | 1                     |
| D3064Y               | B7                    | MMS               | 30                         | 13.59                         | 1                     |
| D3064Y               | B7                    | MMS               | 30                         | 23.55                         | 2                     |
| WT                   | B7                    | MMS               | 30                         | 10.79                         | 1                     |
| D3064Y               | B7                    | MMS               | 40                         | 5.50                          | 1                     |
| D3064Y               | B7                    | MMS               | 40                         | 5.79                          | 2                     |
| WT                   | B7                    | MMS               | 40                         | 3.26                          | 1                     |
| D3064Y               | B7                    | Parp              | 0.01                       | 75.46                         | 1                     |
| D3064Y               | B7                    | Parp              | 0.01                       | 69.95                         | 2                     |
| WT                   | B7                    | Parp              | 0.01                       | 73.99                         | 1                     |
| D3064Y               | B7                    | Parp              | 0.1                        | 52.93                         | 1                     |
| D3064Y               | B7                    | Parp              | 0.1                        | 54.13                         | 2                     |
| WT                   | B7                    | Parp              | 0.1                        | 66.92                         | 1                     |
| D3064Y               | B7                    | Parp              | 1                          | 15.16                         | 1                     |
| D3064Y               | B7                    | Parp              | 1                          | 20.80                         | 2                     |
| WT                   | B7                    | Parp              | 1                          | 24.97                         | 1                     |
| D3064Y               | B7                    | Parp              | 10                         | 2.81                          | 1                     |
| D3064Y               | B7                    | Parp              | 10                         | 3.98                          | 2                     |
| WT                   | B7                    | Parp              | 10                         | 4.72                          | 1                     |

| Variant <sup>a</sup> | Batch ID <sup>b</sup> | Drug <sup>c</sup> | Concentration <sup>d</sup> | Percent Survived <sup>e</sup> | Clone ID <sup>f</sup> |
|----------------------|-----------------------|-------------------|----------------------------|-------------------------------|-----------------------|
| D3064Y               | B7                    | IR                | 50                         | 93.19                         | 1                     |
| D3064Y               | B7                    | IR                | 50                         | 96.76                         | 2                     |
| WT                   | B7                    | IR                | 50                         | 100.00                        | 1                     |
| D3064Y               | B7                    | IR                | 100                        | 90.93                         | 1                     |
| D3064Y               | B7                    | IR                | 100                        | 94.45                         | 2                     |
| WT                   | B7                    | IR                | 100                        | 90.94                         | 1                     |
| D3064Y               | B7                    | IR                | 200                        | 66.88                         | 1                     |
| D3064Y               | B7                    | IR                | 200                        | 70.79                         | 2                     |
| WT                   | B7                    | IR                | 200                        | 81.68                         | 1                     |
| D3064Y               | B7                    | IR                | 400                        | 48.42                         | 1                     |
| D3064Y               | B7                    | IR                | 400                        | 52.39                         | 2                     |
| WT                   | B7                    | IR                | 400                        | 45.14                         | 1                     |
| D3064Y               | B7                    | IR                | 600                        | 34.25                         | 1                     |
| D3064Y               | B7                    | IR                | 600                        | 43.88                         | 2                     |
| WT                   | B7                    | IR                | 600                        | 36.95                         | 1                     |
| P3063S               | B8                    | Camp              | 2.5                        | 100.00                        | 1                     |
| P3063S               | B8                    | Camp              | 2.5                        | 100.00                        | 2                     |
| WT                   | B8                    | Camp              | 2.5                        | 100.00                        | 1                     |
| P3063S               | B8                    | Camp              | 5                          | 100.00                        | 1                     |
| P3063S               | B8                    | Camp              | 5                          | 100.00                        | 2                     |
| WT                   | B8                    | Camp              | 5                          | 100.00                        | 1                     |
| P3063S               | B8                    | Camp              | 25                         | 100.00                        | 1                     |
| P3063S               | B8                    | Camp              | 25                         | 100.00                        | 2                     |
| WT                   | B8                    | Camp              | 25                         | 100.00                        | 1                     |
| P3063S               | B8                    | Camp              | 50                         | 100.00                        | 1                     |
| P3063S               | B8                    | Camp              | 50                         | 100.00                        | 2                     |
| WT                   | B8                    | Camp              | 50                         | 100.00                        | 1                     |
| P3063S               | B8                    | Camp              | 100                        | 59.38                         | 1                     |
| P3063S               | B8                    | Camp              | 100                        | 41.10                         | 2                     |
| WT                   | B8                    | Camp              | 100                        | 44.17                         | 1                     |
| P3063S               | B8                    | Camp              | 200                        | 7.39                          | 1                     |
| P3063S               | B8                    | Camp              | 200                        | 9.48                          | 2                     |
| WT                   | B8                    | Camp              | 200                        | 10.56                         | 1                     |
| P3063S               | B8                    | MMC               | 5                          | 87.78                         | 1                     |
| P3063S               | B8                    | MMC               | 5                          | 95.47                         | 2                     |
| WT                   | B8                    | MMC               | 5                          | 100.00                        | 1                     |
| P3063S               | B8                    | MMC               | 10                         | 78.72                         | 1                     |
| P3063S               | B8                    | MMC               | 10                         | 86.96                         | 2                     |
| WT                   | B8                    | MMC               | 10                         | 92.75                         | 1                     |
| P3063S               | B8                    | MMC               | 20                         | 69.27                         | 1                     |

| Variant <sup>a</sup> | Batch ID <sup>b</sup> | Drug <sup>c</sup> | Concentration <sup>d</sup> | Percent Survived <sup>e</sup> | Clone ID <sup>f</sup> |
|----------------------|-----------------------|-------------------|----------------------------|-------------------------------|-----------------------|
| P3063S               | B8                    | MMC               | 20                         | 75.00                         | 2                     |
| WT                   | B8                    | MMC               | 20                         | 81.75                         | 1                     |
| P3063S               | B8                    | MMC               | 40                         | 29.60                         | 1                     |
| P3063S               | B8                    | MMC               | 40                         | 38.22                         | 2                     |
| WT                   | B8                    | MMC               | 40                         | 45.13                         | 1                     |
| P3063S               | B8                    | MMC               | 60                         | 15.24                         | 1                     |
| P3063S               | B8                    | MMC               | 60                         | 21.20                         | 2                     |
| WT                   | B8                    | MMC               | 60                         | 22.88                         | 1                     |
| P3063S               | B8                    | MMC               | 80                         | 12.72                         | 1                     |
| P3063S               | B8                    | MMC               | 80                         | 12.86                         | 2                     |
| WT                   | B8                    | MMC               | 80                         | 17.50                         | 1                     |
| P3063S               | B8                    | Cisp              | 0.2                        | 34.62                         | 1                     |
| P3063S               | B8                    | Cisp              | 0.2                        | 31.09                         | 2                     |
| WT                   | B8                    | Cisp              | 0.2                        | 41.94                         | 1                     |
| P3063S               | B8                    | Cisp              | 0.4                        | 11.27                         | 1                     |
| P3063S               | B8                    | Cisp              | 0.4                        | 12.56                         | 2                     |
| WT                   | B8                    | Cisp              | 0.4                        | 16.12                         | 1                     |
| P3063S               | B8                    | Cisp              | 0.6                        | 7.16                          | 1                     |
| P3063S               | B8                    | Cisp              | 0.6                        | 8.07                          | 2                     |
| WT                   | B8                    | Cisp              | 0.6                        | 8.91                          | 1                     |
| P3063S               | B8                    | Cisp              | 1                          | 4.24                          | 1                     |
| P3063S               | B8                    | Cisp              | 1                          | 6.13                          | 2                     |
| WT                   | B8                    | Cisp              | 1                          | 6.54                          | 1                     |
| P3063S               | B8                    | Cisp              | 1.2                        | 4.38                          | 1                     |
| P3063S               | B8                    | Cisp              | 1.2                        | 6.58                          | 2                     |
| WT                   | B8                    | Cisp              | 1.2                        | 5.86                          | 1                     |
| P3063S               | B8                    | Cisp              | 1.5                        | 3.05                          | 1                     |
| P3063S               | B8                    | Cisp              | 1.5                        | 4.93                          | 2                     |
| WT                   | B8                    | Cisp              | 1.5                        | 4.85                          | 1                     |
| P3063S               | B8                    | MMS               | 5                          | 100.00                        | 1                     |
| P3063S               | B8                    | MMS               | 5                          | 99.03                         | 2                     |
| WT                   | B8                    | MMS               | 5                          | 100.00                        | 1                     |
| P3063S               | B8                    | MMS               | 10                         | 100.00                        | 1                     |
| P3063S               | B8                    | MMS               | 10                         | 100.00                        | 2                     |
| WT                   | B8                    | MMS               | 10                         | 100.00                        | 1                     |
| P3063S               | B8                    | MMS               | 15                         | 100.00                        | 1                     |
| P3063S               | B8                    | MMS               | 15                         | 100.00                        | 2                     |
| WT                   | B8                    | MMS               | 15                         | 95.24                         | 1                     |
| P3063S               | B8                    | MMS               | 20                         | 98.48                         | 1                     |
| P3063S               | B8                    | MMS               | 20                         | 100.00                        | 2                     |

| Variant <sup>a</sup> | Batch ID <sup>b</sup> | Drug <sup>c</sup> | Concentration <sup>d</sup> | Percent Survived <sup>e</sup> | Clone ID <sup>f</sup> |
|----------------------|-----------------------|-------------------|----------------------------|-------------------------------|-----------------------|
| WT                   | B8                    | MMS               | 20                         | 100.00                        | 1                     |
| P3063S               | B8                    | MMS               | 30                         | 72.73                         | 1                     |
| P3063S               | B8                    | MMS               | 30                         | 55.52                         | 2                     |
| WT                   | B8                    | MMS               | 30                         | 69.84                         | 1                     |
| P3063S               | B8                    | MMS               | 40                         | 28.37                         | 1                     |
| P3063S               | B8                    | MMS               | 40                         | 18.99                         | 2                     |
| WT                   | B8                    | MMS               | 40                         | 44.02                         | 1                     |
| P3063S               | B8                    | Parp              | 0.01                       | 100.00                        | 1                     |
| P3063S               | B8                    | Parp              | 0.01                       | 95.55                         | 2                     |
| WT                   | B8                    | Parp              | 0.01                       | 100.00                        | 1                     |
| P3063S               | B8                    | Parp              | 0.1                        | 100.00                        | 1                     |
| P3063S               | B8                    | Parp              | 0.1                        | 78.49                         | 2                     |
| WT                   | B8                    | Parp              | 0.1                        | 100.00                        | 1                     |
| P3063S               | B8                    | Parp              | 1                          | 59.54                         | 1                     |
| P3063S               | B8                    | Parp              | 1                          | 30.71                         | 2                     |
| WT                   | B8                    | Parp              | 1                          | 92.96                         | 1                     |
| P3063S               | B8                    | Parp              | 10                         | 6.06                          | 1                     |
| P3063S               | B8                    | Parp              | 10                         | 11.42                         | 2                     |
| WT                   | B8                    | Parp              | 10                         | 12.68                         | 1                     |
| P3063S               | B8                    | IR                | 50                         | 77.42                         | 1                     |
| P3063S               | B8                    | IR                | 50                         | 75.36                         | 2                     |
| WT                   | B8                    | IR                | 50                         | 100.00                        | 1                     |
| P3063S               | B8                    | IR                | 100                        | 49.26                         | 1                     |
| P3063S               | B8                    | IR                | 100                        | 45.52                         | 2                     |
| WT                   | B8                    | IR                | 100                        | 80.46                         | 1                     |
| P3063S               | B8                    | IR                | 200                        | 23.89                         | 1                     |
| P3063S               | B8                    | IR                | 200                        | 21.33                         | 2                     |
| WT                   | B8                    | IR                | 200                        | 33.83                         | 1                     |
| P3063S               | B8                    | IR                | 400                        | 8.46                          | 1                     |
| P3063S               | B8                    | IR                | 400                        | 11.38                         | 2                     |
| WT                   | B8                    | IR                | 400                        | 14.40                         | 1                     |
| P3063S               | B8                    | IR                | 600                        | 7.93                          | 1                     |
| P3063S               | B8                    | IR                | 600                        | 7.62                          | 2                     |
| WT                   | B8                    | IR                | 600                        | 13.14                         | 1                     |
| V1643A               | B9                    | Camp              | 2.5                        | 85.96                         | 1                     |
| V1643A               | B9                    | Camp              | 2.5                        | 87.48                         | 2                     |
| WT                   | B9                    | Camp              | 2.5                        | 93.49                         | 1                     |
| V1643A               | B9                    | Camp              | 5                          | 82.57                         | 1                     |
| V1643A               | B9                    | Camp              | 5                          | 93.94                         | 2                     |
| WT                   | B9                    | Camp              | 5                          | 92.32                         | 1                     |

| Variant <sup>a</sup> | Batch ID <sup>b</sup> | Drug <sup>c</sup> | Concentration <sup>d</sup> | Percent Survived <sup>e</sup> | Clone ID <sup>f</sup> |
|----------------------|-----------------------|-------------------|----------------------------|-------------------------------|-----------------------|
| V1643A               | B9                    | Camp              | 25                         | 71.49                         | 1                     |
| V1643A               | B9                    | Camp              | 25                         | 75.35                         | 2                     |
| WT                   | B9                    | Camp              | 25                         | 77.96                         | 1                     |
| V1643A               | B9                    | Camp              | 50                         | 36.62                         | 1                     |
| V1643A               | B9                    | Camp              | 50                         | 36.18                         | 2                     |
| WT                   | B9                    | Camp              | 50                         | 43.91                         | 1                     |
| V1643A               | B9                    | Camp              | 100                        | 6.14                          | 1                     |
| V1643A               | B9                    | Camp              | 100                        | 5.67                          | 2                     |
| WT                   | B9                    | Camp              | 100                        | 7.10                          | 1                     |
| V1643A               | B9                    | Camp              | 200                        | 4.17                          | 1                     |
| V1643A               | B9                    | Camp              | 200                        | 5.86                          | 2                     |
| WT                   | B9                    | Camp              | 200                        | 4.42                          | 1                     |
| V1643A               | B9                    | MMC               | 5                          | 95.33                         | 1                     |
| V1643A               | B9                    | MMC               | 5                          | 94.65                         | 2                     |
| WT                   | B9                    | MMC               | 5                          | 97.28                         | 1                     |
| V1643A               | B9                    | MMC               | 10                         | 79.44                         | 1                     |
| V1643A               | B9                    | MMC               | 10                         | 98.41                         | 2                     |
| WT                   | B9                    | MMC               | 10                         | 92.46                         | 1                     |
| V1643A               | B9                    | MMC               | 20                         | 75.44                         | 1                     |
| V1643A               | B9                    | MMC               | 20                         | 76.42                         | 2                     |
| WT                   | B9                    | MMC               | 20                         | 77.91                         | 1                     |
| V1643A               | B9                    | MMC               | 40                         | 37.00                         | 1                     |
| V1643A               | B9                    | MMC               | 40                         | 35.54                         | 2                     |
| WT                   | B9                    | MMC               | 40                         | 44.43                         | 1                     |
| V1643A               | B9                    | MMC               | 60                         | 18.89                         | 1                     |
| V1643A               | B9                    | MMC               | 60                         | 20.05                         | 2                     |
| WT                   | B9                    | MMC               | 60                         | 25.42                         | 1                     |
| V1643A               | B9                    | MMC               | 80                         | 14.78                         | 1                     |
| V1643A               | B9                    | MMC               | 80                         | 13.55                         | 2                     |
| WT                   | B9                    | MMC               | 80                         | 17.09                         | 1                     |
| V1643A               | B9                    | Cisp              | 0.2                        | 58.81                         | 1                     |
| V1643A               | B9                    | Cisp              | 0.2                        | 54.16                         | 2                     |
| WT                   | B9                    | Cisp              | 0.2                        | 74.03                         | 1                     |
| V1643A               | B9                    | Cisp              | 0.4                        | 27.66                         | 1                     |
| V1643A               | B9                    | Cisp              | 0.4                        | 27.03                         | 2                     |
| WT                   | B9                    | Cisp              | 0.4                        | 46.00                         | 1                     |
| V1643A               | B9                    | Cisp              | 0.6                        | 16.29                         | 1                     |
| V1643A               | B9                    | Cisp              | 0.6                        | 17.67                         | 2                     |
| WT                   | B9                    | Cisp              | 0.6                        | 24.40                         | 1                     |
| V1643A               | B9                    | Cisp              | 1                          | 7.38                          | 1                     |

| Variant <sup>a</sup> | Batch ID <sup>b</sup> | Drug <sup>c</sup> | Concentration <sup>d</sup> | Percent Survived <sup>e</sup> | Clone ID <sup>f</sup> |
|----------------------|-----------------------|-------------------|----------------------------|-------------------------------|-----------------------|
| V1643A               | B9                    | Cisp              | 1                          | 9.04                          | 2                     |
| WT                   | B9                    | Cisp              | 1                          | 10.22                         | 1                     |
| V1643A               | B9                    | Cisp              | 1.2                        | 5.94                          | 1                     |
| V1643A               | B9                    | Cisp              | 1.2                        | 6.96                          | 2                     |
| WT                   | B9                    | Cisp              | 1.2                        | 5.85                          | 1                     |
| V1643A               | B9                    | Cisp              | 1.5                        | 6.15                          | 1                     |
| V1643A               | B9                    | Cisp              | 1.5                        | 7.07                          | 2                     |
| WT                   | B9                    | Cisp              | 1.5                        | 5.77                          | 1                     |
| V1643A               | B9                    | MMS               | 5                          | 63.22                         | 1                     |
| V1643A               | B9                    | MMS               | 5                          | 60.22                         | 2                     |
| WT                   | B9                    | MMS               | 5                          | 77.13                         | 1                     |
| V1643A               | B9                    | MMS               | 10                         | 57.35                         | 1                     |
| V1643A               | B9                    | MMS               | 10                         | 49.21                         | 2                     |
| WT                   | B9                    | MMS               | 10                         | 67.58                         | 1                     |
| V1643A               | B9                    | MMS               | 15                         | 35.87                         | 1                     |
| V1643A               | B9                    | MMS               | 15                         | 27.00                         | 2                     |
| WT                   | B9                    | MMS               | 15                         | 53.33                         | 1                     |
| V1643A               | B9                    | MMS               | 20                         | 17.00                         | 1                     |
| V1643A               | B9                    | MMS               | 20                         | 11.55                         | 2                     |
| WT                   | B9                    | MMS               | 20                         | 30.68                         | 1                     |
| V1643A               | B9                    | MMS               | 30                         | 6.53                          | 1                     |
| V1643A               | B9                    | MMS               | 30                         | 5.33                          | 2                     |
| WT                   | B9                    | MMS               | 30                         | 11.35                         | 1                     |
| V1643A               | B9                    | MMS               | 40                         | 1.69                          | 1                     |
| V1643A               | B9                    | MMS               | 40                         | 3.14                          | 2                     |
| WT                   | B9                    | MMS               | 40                         | 1.47                          | 1                     |
| V1643A               | B9                    | Parp              | 0.01                       | 80.90                         | 1                     |
| V1643A               | B9                    | Parp              | 0.01                       | 68.54                         | 2                     |
| WT                   | B9                    | Parp              | 0.01                       | 84.61                         | 1                     |
| V1643A               | B9                    | Parp              | 0.1                        | 64.00                         | 1                     |
| V1643A               | B9                    | Parp              | 0.1                        | 46.93                         | 2                     |
| WT                   | B9                    | Parp              | 0.1                        | 64.90                         | 1                     |
| V1643A               | B9                    | Parp              | 1                          | 26.39                         | 1                     |
| V1643A               | B9                    | Parp              | 1                          | 13.92                         | 2                     |
| WT                   | B9                    | Parp              | 1                          | 31.16                         | 1                     |
| V1643A               | B9                    | Parp              | 10                         | 2.71                          | 1                     |
| V1643A               | B9                    | Parp              | 10                         | 4.66                          | 2                     |
| WT                   | B9                    | Parp              | 10                         | 4.48                          | 1                     |
| V1643A               | B9                    | IR                | 50                         | 77.18                         | 1                     |
| V1643A               | B9                    | IR                | 50                         | 91.90                         | 2                     |



| Variant <sup>a</sup> | Batch ID <sup>b</sup> | Drug <sup>c</sup> | Concentration <sup>d</sup> | Percent Survived <sup>e</sup> | Clone ID <sup>f</sup> |
|----------------------|-----------------------|-------------------|----------------------------|-------------------------------|-----------------------|
| WT                   | B9                    | IR                | 50                         | 85.33                         | 1                     |
| V1643A               | B9                    | IR                | 100                        | 71.19                         | 1                     |
| V1643A               | B9                    | IR                | 100                        | 81.93                         | 2                     |
| WT                   | B9                    | IR                | 100                        | 76.32                         | 1                     |
| V1643A               | B9                    | IR                | 200                        | 57.97                         | 1                     |
| V1643A               | B9                    | IR                | 200                        | 68.43                         | 2                     |
| WT                   | B9                    | IR                | 200                        | 55.84                         | 1                     |
| V1643A               | B9                    | IR                | 400                        | 37.51                         | 1                     |
| V1643A               | B9                    | IR                | 400                        | 40.60                         | 2                     |
| WT                   | B9                    | IR                | 400                        | 45.38                         | 1                     |
| V1643A               | B9                    | IR                | 600                        | 29.49                         | 1                     |
| V1643A               | B9                    | IR                | 600                        | 25.03                         | 2                     |
| WT                   | B9                    | IR                | 600                        | 24.75                         | 1                     |
| P168T                | B10                   | Camp              | 2.5                        | 89.92                         | 1                     |
| P168T                | B10                   | Camp              | 2.5                        | 100.00                        | 2                     |
| WT                   | B10                   | Camp              | 2.5                        | 89.55                         | 1                     |
| P168T                | B10                   | Camp              | 5                          | 100.00                        | 1                     |
| P168T                | B10                   | Camp              | 5                          | 75.10                         | 2                     |
| WT                   | B10                   | Camp              | 5                          | 87.23                         | 1                     |
| P168T                | B10                   | Camp              | 25                         | 70.77                         | 1                     |
| P168T                | B10                   | Camp              | 25                         | 44.88                         | 2                     |
| WT                   | B10                   | Camp              | 25                         | 65.46                         | 1                     |
| P168T                | B10                   | Camp              | 50                         | 32.25                         | 1                     |
| P168T                | B10                   | Camp              | 50                         | 21.29                         | 2                     |
| WT                   | B10                   | Camp              | 50                         | 42.82                         | 1                     |
| P168T                | B10                   | Camp              | 100                        | 14.00                         | 1                     |
| P168T                | B10                   | Camp              | 100                        | 11.55                         | 2                     |
| WT                   | B10                   | Camp              | 100                        | 8.35                          | 1                     |
| P168T                | B10                   | Camp              | 200                        | 9.29                          | 1                     |
| P168T                | B10                   | Camp              | 200                        | 5.22                          | 2                     |
| WT                   | B10                   | Camp              | 200                        | 2.69                          | 1                     |
| P168T                | B10                   | MMC               | 5                          | 81.21                         | 1                     |
| P168T                | B10                   | MMC               | 5                          | 97.95                         | 2                     |
| WT                   | B10                   | MMC               | 5                          | 87.13                         | 1                     |
| P168T                | B10                   | MMC               | 10                         | 63.65                         | 1                     |
| P168T                | B10                   | MMC               | 10                         | 88.48                         | 2                     |
| WT                   | B10                   | MMC               | 10                         | 67.21                         | 1                     |
| P168T                | B10                   | MMC               | 20                         | 57.59                         | 1                     |
| P168T                | B10                   | MMC               | 20                         | 61.79                         | 2                     |
| WT                   | B10                   | MMC               | 20                         | 68.19                         | 1                     |

| Variant <sup>a</sup> | Batch ID <sup>b</sup> | Drug <sup>c</sup> | Concentration <sup>d</sup> | Percent Survived <sup>e</sup> | Clone ID <sup>f</sup> |
|----------------------|-----------------------|-------------------|----------------------------|-------------------------------|-----------------------|
| P168T                | B10                   | MMC               | 40                         | 39.16                         | 1                     |
| P168T                | B10                   | MMC               | 40                         | 46.72                         | 2                     |
| WT                   | B10                   | MMC               | 40                         | 48.14                         | 1                     |
| P168T                | B10                   | MMC               | 60                         | 25.46                         | 1                     |
| P168T                | B10                   | MMC               | 60                         | 21.85                         | 2                     |
| WT                   | B10                   | MMC               | 60                         | 19.99                         | 1                     |
| P168T                | B10                   | MMC               | 80                         | 12.47                         | 1                     |
| P168T                | B10                   | MMC               | 80                         | 13.24                         | 2                     |
| WT                   | B10                   | MMC               | 80                         | 9.14                          | 1                     |
| P168T                | B10                   | Cisp              | 0.2                        | 62.41                         | 1                     |
| P168T                | B10                   | Cisp              | 0.2                        | 59.48                         | 2                     |
| WT                   | B10                   | Cisp              | 0.2                        | 79.51                         | 1                     |
| P168T                | B10                   | Cisp              | 0.4                        | 47.39                         | 1                     |
| P168T                | B10                   | Cisp              | 0.4                        | 49.89                         | 2                     |
| WT                   | B10                   | Cisp              | 0.4                        | 68.21                         | 1                     |
| P168T                | B10                   | Cisp              | 0.6                        | 30.78                         | 1                     |
| P168T                | B10                   | Cisp              | 0.6                        | 35.56                         | 2                     |
| WT                   | B10                   | Cisp              | 0.6                        | 48.69                         | 1                     |
| P168T                | B10                   | Cisp              | 1                          | 22.20                         | 1                     |
| P168T                | B10                   | Cisp              | 1                          | 21.01                         | 2                     |
| WT                   | B10                   | Cisp              | 1                          | 29.47                         | 1                     |
| P168T                | B10                   | Cisp              | 1.2                        | 15.39                         | 1                     |
| P168T                | B10                   | Cisp              | 1.2                        | 18.43                         | 2                     |
| WT                   | B10                   | Cisp              | 1.2                        | 17.28                         | 1                     |
| P168T                | B10                   | Cisp              | 1.5                        | 12.97                         | 1                     |
| P168T                | B10                   | Cisp              | 1.5                        | 13.79                         | 2                     |
| WT                   | B10                   | Cisp              | 1.5                        | 15.48                         | 1                     |
| P168T                | B10                   | MMS               | 5                          | 84.82                         | 1                     |
| P168T                | B10                   | MMS               | 5                          | 79.63                         | 2                     |
| WT                   | B10                   | MMS               | 5                          | 91.78                         | 1                     |
| P168T                | B10                   | MMS               | 10                         | 93.35                         | 1                     |
| P168T                | B10                   | MMS               | 10                         | 64.57                         | 2                     |
| WT                   | B10                   | MMS               | 10                         | 98.70                         | 1                     |
| P168T                | B10                   | MMS               | 15                         | 68.13                         | 1                     |
| P168T                | B10                   | MMS               | 15                         | 64.25                         | 2                     |
| WT                   | B10                   | MMS               | 15                         | 80.78                         | 1                     |
| P168T                | B10                   | MMS               | 20                         | 49.81                         | 1                     |
| P168T                | B10                   | MMS               | 20                         | 39.54                         | 2                     |
| WT                   | B10                   | MMS               | 20                         | 75.86                         | 1                     |
| P168T                | B10                   | MMS               | 30                         | 18.82                         | 1                     |

| Variant <sup>a</sup> | Batch ID <sup>b</sup> | Drug <sup>c</sup> | Concentration <sup>d</sup> | Percent Survived <sup>e</sup> | Clone ID <sup>f</sup> |
|----------------------|-----------------------|-------------------|----------------------------|-------------------------------|-----------------------|
| P168T                | B10                   | MMS               | 30                         | 13.65                         | 2                     |
| WT                   | B10                   | MMS               | 30                         | 32.17                         | 1                     |
| P168T                | B10                   | MMS               | 40                         | 9.79                          | 1                     |
| P168T                | B10                   | MMS               | 40                         | 6.18                          | 2                     |
| WT                   | B10                   | MMS               | 40                         | 10.91                         | 1                     |
| P168T                | B10                   | Parp              | 0.01                       | 81.80                         | 1                     |
| P168T                | B10                   | Parp              | 0.01                       | 89.20                         | 2                     |
| WT                   | B10                   | Parp              | 0.01                       | 93.34                         | 1                     |
| P168T                | B10                   | Parp              | 0.1                        | 71.11                         | 1                     |
| P168T                | B10                   | Parp              | 0.1                        | 69.84                         | 2                     |
| WT                   | B10                   | Parp              | 0.1                        | 87.76                         | 1                     |
| P168T                | B10                   | Parp              | 1                          | 29.86                         | 1                     |
| P168T                | B10                   | Parp              | 1                          | 29.39                         | 2                     |
| WT                   | B10                   | Parp              | 1                          | 59.14                         | 1                     |
| P168T                | B10                   | Parp              | 10                         | 5.65                          | 1                     |
| P168T                | B10                   | Parp              | 10                         | 6.40                          | 2                     |
| WT                   | B10                   | Parp              | 10                         | 2.99                          | 1                     |
| P168T                | B10                   | IR                | 50                         | 70.62                         | 1                     |
| P168T                | B10                   | IR                | 50                         | 70.36                         | 2                     |
| WT                   | B10                   | IR                | 50                         | 95.47                         | 1                     |
| P168T                | B10                   | IR                | 100                        | 72.96                         | 1                     |
| P168T                | B10                   | IR                | 100                        | 73.14                         | 2                     |
| WT                   | B10                   | IR                | 100                        | 85.43                         | 1                     |
| P168T                | B10                   | IR                | 200                        | 55.89                         | 1                     |
| P168T                | B10                   | IR                | 200                        | 53.88                         | 2                     |
| WT                   | B10                   | IR                | 200                        | 71.85                         | 1                     |
| P168T                | B10                   | IR                | 400                        | 33.71                         | 1                     |
| P168T                | B10                   | IR                | 400                        | 29.71                         | 2                     |
| WT                   | B10                   | IR                | 400                        | 51.49                         | 1                     |
| P168T                | B10                   | IR                | 600                        | 22.10                         | 1                     |
| P168T                | B10                   | IR                | 600                        | 20.60                         | 2                     |
| WT                   | B10                   | IR                | 600                        | 32.18                         | 1                     |
| S2483N               | B11                   | Camp              | 2.5                        | 100.00                        | 1                     |
| S2483N               | B11                   | Camp              | 2.5                        | 98.38                         | 2                     |
| WT                   | B11                   | Camp              | 2.5                        | 100.00                        | 1                     |
| S2483N               | B11                   | Camp              | 5                          | 87.07                         | 1                     |
| S2483N               | B11                   | Camp              | 5                          | 85.75                         | 2                     |
| WT                   | B11                   | Camp              | 5                          | 100.00                        | 1                     |
| S2483N               | B11                   | Camp              | 25                         | 52.81                         | 1                     |
| S2483N               | B11                   | Camp              | 25                         | 50.17                         | 2                     |

| Variant <sup>a</sup> | Batch ID <sup>b</sup> | Drug <sup>c</sup> | Concentration <sup>d</sup> | Percent Survived <sup>e</sup> | Clone ID <sup>f</sup> |
|----------------------|-----------------------|-------------------|----------------------------|-------------------------------|-----------------------|
| WT                   | B11                   | Camp              | 25                         | 73.79                         | 1                     |
| S2483N               | B11                   | Camp              | 50                         | 18.28                         | 1                     |
| S2483N               | B11                   | Camp              | 50                         | 12.29                         | 2                     |
| WT                   | B11                   | Camp              | 50                         | 37.95                         | 1                     |
| S2483N               | B11                   | Camp              | 100                        | 3.45                          | 1                     |
| S2483N               | B11                   | Camp              | 100                        | 2.50                          | 2                     |
| WT                   | B11                   | Camp              | 100                        | 6.89                          | 1                     |
| S2483N               | B11                   | Camp              | 200                        | 2.84                          | 1                     |
| S2483N               | B11                   | Camp              | 200                        | 2.30                          | 2                     |
| WT                   | B11                   | Camp              | 200                        | 3.62                          | 1                     |
| S2483N               | B11                   | MMC               | 5                          | 81.32                         | 1                     |
| S2483N               | B11                   | MMC               | 5                          | 80.75                         | 2                     |
| WT                   | B11                   | MMC               | 5                          | 75.29                         | 1                     |
| S2483N               | B11                   | MMC               | 10                         | 66.67                         | 1                     |
| S2483N               | B11                   | MMC               | 10                         | 68.84                         | 2                     |
| WT                   | B11                   | MMC               | 10                         | 62.74                         | 1                     |
| S2483N               | B11                   | MMC               | 20                         | 35.19                         | 1                     |
| S2483N               | B11                   | MMC               | 20                         | 35.40                         | 2                     |
| WT                   | B11                   | MMC               | 20                         | 52.89                         | 1                     |
| S2483N               | B11                   | MMC               | 40                         | 15.58                         | 1                     |
| S2483N               | B11                   | MMC               | 40                         | 9.46                          | 2                     |
| WT                   | B11                   | MMC               | 40                         | 23.94                         | 1                     |
| S2483N               | B11                   | MMC               | 60                         | 6.81                          | 1                     |
| S2483N               | B11                   | MMC               | 60                         | 4.08                          | 2                     |
| WT                   | B11                   | MMC               | 60                         | 11.62                         | 1                     |
| S2483N               | B11                   | MMC               | 80                         | 5.78                          | 1                     |
| S2483N               | B11                   | MMC               | 80                         | 3.92                          | 2                     |
| WT                   | B11                   | MMC               | 80                         | 7.62                          | 1                     |
| S2483N               | B11                   | Cisp              | 0.2                        | 27.19                         | 1                     |
| S2483N               | B11                   | Cisp              | 0.2                        | 11.98                         | 2                     |
| WT                   | B11                   | Cisp              | 0.2                        | 26.13                         | 1                     |
| S2483N               | B11                   | Cisp              | 0.4                        | 7.83                          | 1                     |
| S2483N               | B11                   | Cisp              | 0.4                        | 6.90                          | 2                     |
| WT                   | B11                   | Cisp              | 0.4                        | 7.09                          | 1                     |
| S2483N               | B11                   | Cisp              | 0.6                        | 3.26                          | 1                     |
| S2483N               | B11                   | Cisp              | 0.6                        | 2.03                          | 2                     |
| WT                   | B11                   | Cisp              | 0.6                        | 3.55                          | 1                     |
| S2483N               | B11                   | Cisp              | 1                          | 1.74                          | 1                     |
| S2483N               | B11                   | Cisp              | 1                          | 1.74                          | 2                     |
| WT                   | B11                   | Cisp              | 1                          | 3.14                          | 1                     |

| Variant <sup>a</sup> | Batch ID <sup>b</sup> | Drug <sup>c</sup> | Concentration <sup>d</sup> | Percent Survived <sup>e</sup> | Clone ID <sup>f</sup> |
|----------------------|-----------------------|-------------------|----------------------------|-------------------------------|-----------------------|
| S2483N               | B11                   | Cisp              | 1.2                        | 1.52                          | 1                     |
| S2483N               | B11                   | Cisp              | 1.2                        | 1.60                          | 2                     |
| WT                   | B11                   | Cisp              | 1.2                        | 2.05                          | 1                     |
| S2483N               | B11                   | Cisp              | 1.5                        | 2.18                          | 1                     |
| S2483N               | B11                   | Cisp              | 1.5                        | 1.89                          | 2                     |
| WT                   | B11                   | Cisp              | 1.5                        | 2.25                          | 1                     |
| S2483N               | B11                   | MMS               | 5                          | 77.91                         | 1                     |
| S2483N               | B11                   | MMS               | 5                          | 77.74                         | 2                     |
| WT                   | B11                   | MMS               | 5                          | 80.20                         | 1                     |
| S2483N               | B11                   | MMS               | 10                         | 61.12                         | 1                     |
| S2483N               | B11                   | MMS               | 10                         | 59.90                         | 2                     |
| WT                   | B11                   | MMS               | 10                         | 72.21                         | 1                     |
| S2483N               | B11                   | MMS               | 15                         | 44.26                         | 1                     |
| S2483N               | B11                   | MMS               | 15                         | 30.77                         | 2                     |
| WT                   | B11                   | MMS               | 15                         | 62.51                         | 1                     |
| S2483N               | B11                   | MMS               | 20                         | 19.68                         | 1                     |
| S2483N               | B11                   | MMS               | 20                         | 16.10                         | 2                     |
| WT                   | B11                   | MMS               | 20                         | 30.97                         | 1                     |
| S2483N               | B11                   | MMS               | 30                         | 4.98                          | 1                     |
| S2483N               | B11                   | MMS               | 30                         | 3.69                          | 2                     |
| WT                   | B11                   | MMS               | 30                         | 9.21                          | 1                     |
| S2483N               | B11                   | MMS               | 40                         | 3.13                          | 1                     |
| S2483N               | B11                   | MMS               | 40                         | 2.36                          | 2                     |
| WT                   | B11                   | MMS               | 40                         | 5.22                          | 1                     |
| S2483N               | B11                   | Parp              | 0.01                       | 100.00                        | 1                     |
| S2483N               | B11                   | Parp              | 0.01                       | 86.99                         | 2                     |
| WT                   | B11                   | Parp              | 0.01                       | 100.00                        | 1                     |
| S2483N               | B11                   | Parp              | 0.1                        | 88.59                         | 1                     |
| S2483N               | B11                   | Parp              | 0.1                        | 62.92                         | 2                     |
| WT                   | B11                   | Parp              | 0.1                        | 79.73                         | 1                     |
| S2483N               | B11                   | Parp              | 1                          | 26.68                         | 1                     |
| S2483N               | B11                   | Parp              | 1                          | 25.13                         | 2                     |
| WT                   | B11                   | Parp              | 1                          | 49.61                         | 1                     |
| S2483N               | B11                   | Parp              | 10                         | 5.43                          | 1                     |
| S2483N               | B11                   | Parp              | 10                         | 5.84                          | 2                     |
| WT                   | B11                   | Parp              | 10                         | 5.13                          | 1                     |
| S2483N               | B11                   | IR                | 50                         | 76.69                         | 1                     |
| S2483N               | B11                   | IR                | 50                         | 73.40                         | 2                     |
| WT                   | B11                   | IR                | 50                         | 90.45                         | 1                     |
| S2483N               | B11                   | IR                | 100                        | 96.40                         | 1                     |

| Variant <sup>a</sup> | Batch ID <sup>b</sup> | Drug <sup>c</sup> | Concentration <sup>d</sup> | Percent Survived <sup>e</sup> | Clone ID <sup>f</sup> |
|----------------------|-----------------------|-------------------|----------------------------|-------------------------------|-----------------------|
| S2483N               | B11                   | IR                | 100                        | 63.64                         | 2                     |
| WT                   | B11                   | IR                | 100                        | 75.45                         | 1                     |
| S2483N               | B11                   | IR                | 200                        | 72.97                         | 1                     |
| S2483N               | B11                   | IR                | 200                        | 62.85                         | 2                     |
| WT                   | B11                   | IR                | 200                        | 84.38                         | 1                     |
| S2483N               | B11                   | IR                | 400                        | 51.46                         | 1                     |
| S2483N               | B11                   | IR                | 400                        | 48.04                         | 2                     |
| WT                   | B11                   | IR                | 400                        | 52.41                         | 1                     |
| S2483N               | B11                   | IR                | 600                        | 27.82                         | 1                     |
| S2483N               | B11                   | IR                | 600                        | 32.66                         | 2                     |
| WT                   | B11                   | IR                | 600                        | 28.39                         | 1                     |
| S2483G               | B12                   | Camp              | 2.5                        | 76.70                         | 1                     |
| S2483G               | B12                   | Camp              | 2.5                        | 78.58                         | 2                     |
| WT                   | B12                   | Camp              | 2.5                        | 91.57                         | 1                     |
| S2483G               | B12                   | Camp              | 5                          | 68.86                         | 1                     |
| S2483G               | B12                   | Camp              | 5                          | 72.18                         | 2                     |
| WT                   | B12                   | Camp              | 5                          | 75.55                         | 1                     |
| S2483G               | B12                   | Camp              | 25                         | 36.51                         | 1                     |
| S2483G               | B12                   | Camp              | 25                         | 51.60                         | 2                     |
| WT                   | B12                   | Camp              | 25                         | 57.49                         | 1                     |
| S2483G               | B12                   | Camp              | 50                         | 17.45                         | 1                     |
| S2483G               | B12                   | Camp              | 50                         | 16.98                         | 2                     |
| WT                   | B12                   | Camp              | 50                         | 28.14                         | 1                     |
| S2483G               | B12                   | Camp              | 100                        | 5.60                          | 1                     |
| S2483G               | B12                   | Camp              | 100                        | 4.78                          | 2                     |
| WT                   | B12                   | Camp              | 100                        | 8.13                          | 1                     |
| S2483G               | B12                   | Camp              | 200                        | 4.88                          | 1                     |
| S2483G               | B12                   | Camp              | 200                        | 3.20                          | 2                     |
| WT                   | B12                   | Camp              | 200                        | 7.45                          | 1                     |
| S2483G               | B12                   | MMC               | 5                          | 80.30                         | 1                     |
| S2483G               | B12                   | MMC               | 5                          | 76.27                         | 2                     |
| WT                   | B12                   | MMC               | 5                          | 83.26                         | 1                     |
| S2483G               | B12                   | MMC               | 10                         | 63.45                         | 1                     |
| S2483G               | B12                   | MMC               | 10                         | 60.31                         | 2                     |
| WT                   | B12                   | MMC               | 10                         | 70.70                         | 1                     |
| S2483G               | B12                   | MMC               | 20                         | 44.81                         | 1                     |
| S2483G               | B12                   | MMC               | 20                         | 47.63                         | 2                     |
| WT                   | B12                   | MMC               | 20                         | 51.81                         | 1                     |
| S2483G               | B12                   | MMC               | 40                         | 19.92                         | 1                     |
| S2483G               | B12                   | MMC               | 40                         | 20.97                         | 2                     |

| Variant <sup>a</sup> | Batch ID <sup>b</sup> | Drug <sup>c</sup> | Concentration <sup>d</sup> | Percent Survived <sup>e</sup> | Clone ID <sup>f</sup> |
|----------------------|-----------------------|-------------------|----------------------------|-------------------------------|-----------------------|
| WT                   | B12                   | MMC               | 40                         | 24.32                         | 1                     |
| S2483G               | B12                   | MMC               | 60                         | 10.70                         | 1                     |
| S2483G               | B12                   | MMC               | 60                         | 13.63                         | 2                     |
| WT                   | B12                   | MMC               | 60                         | 8.82                          | 1                     |
| S2483G               | B12                   | MMC               | 80                         | 17.90                         | 1                     |
| S2483G               | B12                   | MMC               | 80                         | 13.46                         | 2                     |
| WT                   | B12                   | MMC               | 80                         | 12.33                         | 1                     |
| S2483G               | B12                   | Cisp              | 0.2                        | 62.92                         | 1                     |
| S2483G               | B12                   | Cisp              | 0.2                        | 71.67                         | 2                     |
| WT                   | B12                   | Cisp              | 0.2                        | 76.44                         | 1                     |
| S2483G               | B12                   | Cisp              | 0.4                        | 29.53                         | 1                     |
| S2483G               | B12                   | Cisp              | 0.4                        | 50.83                         | 2                     |
| WT                   | B12                   | Cisp              | 0.4                        | 39.60                         | 1                     |
| S2483G               | B12                   | Cisp              | 0.6                        | 19.25                         | 1                     |
| S2483G               | B12                   | Cisp              | 0.6                        | 37.84                         | 2                     |
| WT                   | B12                   | Cisp              | 0.6                        | 26.96                         | 1                     |
| S2483G               | B12                   | Cisp              | 1                          | 7.55                          | 1                     |
| S2483G               | B12                   | Cisp              | 1                          | 14.63                         | 2                     |
| WT                   | B12                   | Cisp              | 1                          | 13.75                         | 1                     |
| S2483G               | B12                   | Cisp              | 1.2                        | 6.32                          | 1                     |
| S2483G               | B12                   | Cisp              | 1.2                        | 9.19                          | 2                     |
| WT                   | B12                   | Cisp              | 1.2                        | 8.85                          | 1                     |
| S2483G               | B12                   | Cisp              | 1.5                        | 7.08                          | 1                     |
| S2483G               | B12                   | Cisp              | 1.5                        | 7.92                          | 2                     |
| WT                   | B12                   | Cisp              | 1.5                        | 11.15                         | 1                     |
| S2483G               | B12                   | MMS               | 5                          | 58.00                         | 1                     |
| S2483G               | B12                   | MMS               | 5                          | 85.47                         | 2                     |
| WT                   | B12                   | MMS               | 5                          | 78.43                         | 1                     |
| S2483G               | B12                   | MMS               | 10                         | 41.75                         | 1                     |
| S2483G               | B12                   | MMS               | 10                         | 57.12                         | 2                     |
| WT                   | B12                   | MMS               | 10                         | 66.58                         | 1                     |
| S2483G               | B12                   | MMS               | 15                         | 13.09                         | 1                     |
| S2483G               | B12                   | MMS               | 15                         | 26.52                         | 2                     |
| WT                   | B12                   | MMS               | 15                         | 41.26                         | 1                     |
| S2483G               | B12                   | MMS               | 20                         | 7.87                          | 1                     |
| S2483G               | B12                   | MMS               | 20                         | 14.03                         | 2                     |
| WT                   | B12                   | MMS               | 20                         | 21.40                         | 1                     |
| S2483G               | B12                   | MMS               | 30                         | 2.99                          | 1                     |
| S2483G               | B12                   | MMS               | 30                         | 3.31                          | 2                     |
| WT                   | B12                   | MMS               | 30                         | 9.38                          | 1                     |

| Variant <sup>a</sup> | Batch ID <sup>b</sup> | Drug <sup>c</sup> | Concentration <sup>d</sup> | Percent Survived <sup>e</sup> | Clone ID <sup>f</sup> |
|----------------------|-----------------------|-------------------|----------------------------|-------------------------------|-----------------------|
| S2483G               | B12                   | MMS               | 40                         | 1.88                          | 1                     |
| S2483G               | B12                   | MMS               | 40                         | 2.54                          | 2                     |
| WT                   | B12                   | MMS               | 40                         | 5.20                          | 1                     |
| S2483G               | B12                   | Parp              | 0.01                       | 75.94                         | 1                     |
| S2483G               | B12                   | Parp              | 0.01                       | 83.01                         | 2                     |
| WT                   | B12                   | Parp              | 0.01                       | 100.00                        | 1                     |
| S2483G               | B12                   | Parp              | 0.1                        | 54.19                         | 1                     |
| S2483G               | B12                   | Parp              | 0.1                        | 57.22                         | 2                     |
| WT                   | B12                   | Parp              | 0.1                        | 73.35                         | 1                     |
| S2483G               | B12                   | Parp              | 1                          | 14.24                         | 1                     |
| S2483G               | B12                   | Parp              | 1                          | 14.31                         | 2                     |
| WT                   | B12                   | Parp              | 1                          | 32.02                         | 1                     |
| S2483G               | B12                   | Parp              | 10                         | 3.95                          | 1                     |
| S2483G               | B12                   | Parp              | 10                         | 3.85                          | 2                     |
| WT                   | B12                   | Parp              | 10                         | 4.90                          | 1                     |
| S2483G               | B12                   | IR                | 50                         | 99.79                         | 1                     |
| S2483G               | B12                   | IR                | 50                         | 100.00                        | 2                     |
| WT                   | B12                   | IR                | 50                         | 100.00                        | 1                     |
| S2483G               | B12                   | IR                | 100                        | 79.69                         | 1                     |
| S2483G               | B12                   | IR                | 100                        | 100.00                        | 2                     |
| WT                   | B12                   | IR                | 100                        | 89.17                         | 1                     |
| S2483G               | B12                   | IR                | 200                        | 55.54                         | 1                     |
| S2483G               | B12                   | IR                | 200                        | 76.92                         | 2                     |
| WT                   | B12                   | IR                | 200                        | 74.06                         | 1                     |
| S2483G               | B12                   | IR                | 400                        | 26.84                         | 1                     |
| S2483G               | B12                   | IR                | 400                        | 40.94                         | 2                     |
| WT                   | B12                   | IR                | 400                        | 37.94                         | 1                     |
| S2483G               | B12                   | IR                | 600                        | 17.62                         | 1                     |
| S2483G               | B12                   | IR                | 600                        | 26.84                         | 2                     |
| WT                   | B12                   | IR                | 600                        | 24.44                         | 1                     |
| R2488S               | B13                   | Camp              | 2.5                        | 79.70                         | 1                     |
| R2488S               | B13                   | Camp              | 2.5                        | 81.69                         | 2                     |
| WT                   | B13                   | Camp              | 2.5                        | 91.57                         | 1                     |
| R2488S               | B13                   | Camp              | 5                          | 76.90                         | 1                     |
| R2488S               | B13                   | Camp              | 5                          | 71.58                         | 2                     |
| WT                   | B13                   | Camp              | 5                          | 75.55                         | 1                     |
| R2488S               | B13                   | Camp              | 25                         | 61.39                         | 1                     |
| R2488S               | B13                   | Camp              | 25                         | 61.57                         | 2                     |
| WT                   | B13                   | Camp              | 25                         | 57.49                         | 1                     |
| R2488S               | B13                   | Camp              | 50                         | 31.68                         | 1                     |



| Variant <sup>a</sup> | Batch ID <sup>b</sup> | Drug <sup>c</sup> | Concentration <sup>d</sup> | Percent Survived <sup>e</sup> | Clone ID <sup>f</sup> |
|----------------------|-----------------------|-------------------|----------------------------|-------------------------------|-----------------------|
| R2488S               | B13                   | Camp              | 50                         | 30.60                         | 2                     |
| WT                   | B13                   | Camp              | 50                         | 28.14                         | 1                     |
| R2488S               | B13                   | Camp              | 100                        | 10.48                         | 1                     |
| R2488S               | B13                   | Camp              | 100                        | 11.20                         | 2                     |
| WT                   | B13                   | Camp              | 100                        | 8.13                          | 1                     |
| R2488S               | B13                   | Camp              | 200                        | 11.22                         | 1                     |
| R2488S               | B13                   | Camp              | 200                        | 6.28                          | 2                     |
| WT                   | B13                   | Camp              | 200                        | 7.45                          | 1                     |
| R2488S               | B13                   | MMC               | 5                          | 95.86                         | 1                     |
| R2488S               | B13                   | MMC               | 5                          | 86.52                         | 2                     |
| WT                   | B13                   | MMC               | 5                          | 83.26                         | 1                     |
| R2488S               | B13                   | MMC               | 10                         | 78.93                         | 1                     |
| R2488S               | B13                   | MMC               | 10                         | 68.64                         | 2                     |
| WT                   | B13                   | MMC               | 10                         | 70.70                         | 1                     |
| R2488S               | B13                   | MMC               | 20                         | 65.16                         | 1                     |
| R2488S               | B13                   | MMC               | 20                         | 48.61                         | 2                     |
| WT                   | B13                   | MMC               | 20                         | 51.81                         | 1                     |
| R2488S               | B13                   | MMC               | 40                         | 45.55                         | 1                     |
| R2488S               | B13                   | MMC               | 40                         | 32.12                         | 2                     |
| WT                   | B13                   | MMC               | 40                         | 24.32                         | 1                     |
| R2488S               | B13                   | MMC               | 60                         | 27.16                         | 1                     |
| R2488S               | B13                   | MMC               | 60                         | 23.68                         | 2                     |
| WT                   | B13                   | MMC               | 60                         | 8.82                          | 1                     |
| R2488S               | B13                   | MMC               | 80                         | 19.37                         | 1                     |
| R2488S               | B13                   | MMC               | 80                         | 14.74                         | 2                     |
| WT                   | B13                   | MMC               | 80                         | 12.33                         | 1                     |
| R2488S               | B13                   | Cisp              | 0.2                        | 59.39                         | 1                     |
| R2488S               | B13                   | Cisp              | 0.2                        | 56.11                         | 2                     |
| WT                   | B13                   | Cisp              | 0.2                        | 76.44                         | 1                     |
| R2488S               | B13                   | Cisp              | 0.4                        | 38.04                         | 1                     |
| R2488S               | B13                   | Cisp              | 0.4                        | 32.88                         | 2                     |
| WT                   | B13                   | Cisp              | 0.4                        | 39.60                         | 1                     |
| R2488S               | B13                   | Cisp              | 0.6                        | 26.81                         | 1                     |
| R2488S               | B13                   | Cisp              | 0.6                        | 21.95                         | 2                     |
| WT                   | B13                   | Cisp              | 0.6                        | 26.96                         | 1                     |
| R2488S               | B13                   | Cisp              | 1                          | 14.11                         | 1                     |
| R2488S               | B13                   | Cisp              | 1                          | 11.66                         | 2                     |
| WT                   | B13                   | Cisp              | 1                          | 13.75                         | 1                     |
| R2488S               | B13                   | Cisp              | 1.2                        | 13.25                         | 1                     |
| R2488S               | B13                   | Cisp              | 1.2                        | 10.61                         | 2                     |

| Variant <sup>a</sup> | Batch ID <sup>b</sup> | Drug <sup>c</sup> | Concentration <sup>d</sup> | Percent Survived <sup>e</sup> | Clone ID <sup>f</sup> |
|----------------------|-----------------------|-------------------|----------------------------|-------------------------------|-----------------------|
| WT                   | B13                   | Cisp              | 1.2                        | 8.85                          | 1                     |
| R2488S               | B13                   | Cisp              | 1.5                        | 11.93                         | 1                     |
| R2488S               | B13                   | Cisp              | 1.5                        | 8.76                          | 2                     |
| WT                   | B13                   | Cisp              | 1.5                        | 11.15                         | 1                     |
| R2488S               | B13                   | MMS               | 5                          | 100.00                        | 1                     |
| R2488S               | B13                   | MMS               | 5                          | 83.79                         | 2                     |
| WT                   | B13                   | MMS               | 5                          | 78.43                         | 1                     |
| R2488S               | B13                   | MMS               | 10                         | 69.90                         | 1                     |
| R2488S               | B13                   | MMS               | 10                         | 46.01                         | 2                     |
| WT                   | B13                   | MMS               | 10                         | 66.58                         | 1                     |
| R2488S               | B13                   | MMS               | 15                         | 48.73                         | 1                     |
| R2488S               | B13                   | MMS               | 15                         | 33.39                         | 2                     |
| WT                   | B13                   | MMS               | 15                         | 41.26                         | 1                     |
| R2488S               | B13                   | MMS               | 20                         | 33.24                         | 1                     |
| R2488S               | B13                   | MMS               | 20                         | 18.67                         | 2                     |
| WT                   | B13                   | MMS               | 20                         | 21.40                         | 1                     |
| R2488S               | B13                   | MMS               | 30                         | 8.53                          | 1                     |
| R2488S               | B13                   | MMS               | 30                         | 4.03                          | 2                     |
| WT                   | B13                   | MMS               | 30                         | 9.38                          | 1                     |
| R2488S               | B13                   | MMS               | 40                         | 3.63                          | 1                     |
| R2488S               | B13                   | MMS               | 40                         | 2.37                          | 2                     |
| WT                   | B13                   | MMS               | 40                         | 5.20                          | 1                     |
| R2488S               | B13                   | Parp              | 0.01                       | 83.90                         | 1                     |
| R2488S               | B13                   | Parp              | 0.01                       | 80.66                         | 2                     |
| WT                   | B13                   | Parp              | 0.01                       | 100.00                        | 1                     |
| R2488S               | B13                   | Parp              | 0.1                        | 64.51                         | 1                     |
| R2488S               | B13                   | Parp              | 0.1                        | 52.46                         | 2                     |
| WT                   | B13                   | Parp              | 0.1                        | 73.35                         | 1                     |
| R2488S               | B13                   | Parp              | 1                          | 18.32                         | 1                     |
| R2488S               | B13                   | Parp              | 1                          | 10.93                         | 2                     |
| WT                   | B13                   | Parp              | 1                          | 32.02                         | 1                     |
| R2488S               | B13                   | Parp              | 10                         | 5.11                          | 1                     |
| R2488S               | B13                   | Parp              | 10                         | 4.15                          | 2                     |
| WT                   | B13                   | Parp              | 10                         | 4.90                          | 1                     |
| R2488S               | B13                   | IR                | 50                         | 100.00                        | 1                     |
| R2488S               | B13                   | IR                | 50                         | 97.42                         | 2                     |
| WT                   | B13                   | IR                | 50                         | 100.00                        | 1                     |
| R2488S               | B13                   | IR                | 100                        | 93.47                         | 1                     |
| R2488S               | B13                   | IR                | 100                        | 82.25                         | 2                     |
| WT                   | B13                   | IR                | 100                        | 89.17                         | 1                     |

| Variant <sup>a</sup> | Batch ID <sup>b</sup> | Drug <sup>c</sup> | Concentration <sup>d</sup> | Percent Survived <sup>e</sup> | Clone ID <sup>f</sup> |
|----------------------|-----------------------|-------------------|----------------------------|-------------------------------|-----------------------|
| R2488S               | B13                   | IR                | 200                        | 80.88                         | 1                     |
| R2488S               | B13                   | IR                | 200                        | 66.77                         | 2                     |
| WT                   | B13                   | IR                | 200                        | 74.06                         | 1                     |
| R2488S               | B13                   | IR                | 400                        | 43.11                         | 1                     |
| R2488S               | B13                   | IR                | 400                        | 31.68                         | 2                     |
| WT                   | B13                   | IR                | 400                        | 37.94                         | 1                     |
| R2488S               | B13                   | IR                | 600                        | 29.69                         | 1                     |
| R2488S               | B13                   | IR                | 600                        | 20.33                         | 2                     |
| WT                   | B13                   | IR                | 600                        | 24.44                         | 1                     |
| T2681R               | B14                   | Camp              | 2.5                        | 63.30                         | 1                     |
| T2681R               | B14                   | Camp              | 2.5                        | 62.38                         | 2                     |
| WT                   | B14                   | Camp              | 2.5                        | 60.95                         | 1                     |
| T2681R               | B14                   | Camp              | 5                          | 53.37                         | 1                     |
| T2681R               | B14                   | Camp              | 5                          | 38.61                         | 2                     |
| WT                   | B14                   | Camp              | 5                          | 62.14                         | 1                     |
| T2681R               | B14                   | Camp              | 25                         | 37.88                         | 1                     |
| T2681R               | B14                   | Camp              | 25                         | 35.77                         | 2                     |
| WT                   | B14                   | Camp              | 25                         | 44.40                         | 1                     |
| T2681R               | B14                   | Camp              | 50                         | 14.48                         | 1                     |
| T2681R               | B14                   | Camp              | 50                         | 11.26                         | 2                     |
| WT                   | B14                   | Camp              | 50                         | 23.79                         | 1                     |
| T2681R               | B14                   | Camp              | 100                        | 4.46                          | 1                     |
| T2681R               | B14                   | Camp              | 100                        | 3.96                          | 2                     |
| WT                   | B14                   | Camp              | 100                        | 9.51                          | 1                     |
| T2681R               | B14                   | Camp              | 200                        | 3.37                          | 1                     |
| T2681R               | B14                   | Camp              | 200                        | 3.71                          | 2                     |
| WT                   | B14                   | Camp              | 200                        | 5.85                          | 1                     |
| T2681R               | B14                   | MMC               | 5                          | 50.69                         | 1                     |
| T2681R               | B14                   | MMC               | 5                          | 43.78                         | 2                     |
| WT                   | B14                   | MMC               | 5                          | 51.63                         | 1                     |
| T2681R               | B14                   | MMC               | 10                         | 48.94                         | 1                     |
| T2681R               | B14                   | MMC               | 10                         | 39.72                         | 2                     |
| WT                   | B14                   | MMC               | 10                         | 47.53                         | 1                     |
| T2681R               | B14                   | MMC               | 20                         | 24.10                         | 1                     |
| T2681R               | B14                   | MMC               | 20                         | 25.59                         | 2                     |
| WT                   | B14                   | MMC               | 20                         | 32.42                         | 1                     |
| T2681R               | B14                   | MMC               | 40                         | 9.02                          | 1                     |
| T2681R               | B14                   | MMC               | 40                         | 9.93                          | 2                     |
| WT                   | B14                   | MMC               | 40                         | 18.15                         | 1                     |
| T2681R               | B14                   | MMC               | 60                         | 5.89                          | 1                     |

| Variant <sup>a</sup> | Batch ID <sup>b</sup> | Drug <sup>c</sup> | Concentration <sup>d</sup> | Percent Survived <sup>e</sup> | Clone ID <sup>f</sup> |
|----------------------|-----------------------|-------------------|----------------------------|-------------------------------|-----------------------|
| T2681R               | B14                   | MMC               | 60                         | 3.64                          | 2                     |
| WT                   | B14                   | MMC               | 60                         | 9.34                          | 1                     |
| T2681R               | B14                   | MMC               | 80                         | 5.24                          | 1                     |
| T2681R               | B14                   | MMC               | 80                         | 3.22                          | 2                     |
| WT                   | B14                   | MMC               | 80                         | 8.60                          | 1                     |
| T2681R               | B14                   | Cisp              | 0.2                        | 39.29                         | 1                     |
| T2681R               | B14                   | Cisp              | 0.2                        | 31.16                         | 2                     |
| WT                   | B14                   | Cisp              | 0.2                        | 48.90                         | 1                     |
| T2681R               | B14                   | Cisp              | 0.4                        | 21.65                         | 1                     |
| T2681R               | B14                   | Cisp              | 0.4                        | 21.25                         | 2                     |
| WT                   | B14                   | Cisp              | 0.4                        | 31.66                         | 1                     |
| T2681R               | B14                   | Cisp              | 0.6                        | 14.29                         | 1                     |
| T2681R               | B14                   | Cisp              | 0.6                        | 16.57                         | 2                     |
| WT                   | B14                   | Cisp              | 0.6                        | 21.88                         | 1                     |
| T2681R               | B14                   | Cisp              | 1                          | 8.59                          | 1                     |
| T2681R               | B14                   | Cisp              | 1                          | 9.35                          | 2                     |
| WT                   | B14                   | Cisp              | 1                          | 13.45                         | 1                     |
| T2681R               | B14                   | Cisp              | 1.2                        | 6.58                          | 1                     |
| T2681R               | B14                   | Cisp              | 1.2                        | 7.08                          | 2                     |
| WT                   | B14                   | Cisp              | 1.2                        | 10.02                         | 1                     |
| T2681R               | B14                   | Cisp              | 1.5                        | 6.14                          | 1                     |
| T2681R               | B14                   | Cisp              | 1.5                        | 5.67                          | 2                     |
| WT                   | B14                   | Cisp              | 1.5                        | 11.61                         | 1                     |
| T2681R               | B14                   | MMS               | 5                          | 48.07                         | 1                     |
| T2681R               | B14                   | MMS               | 5                          | 55.82                         | 2                     |
| WT                   | B14                   | MMS               | 5                          | 70.61                         | 1                     |
| T2681R               | B14                   | MMS               | 10                         | 24.97                         | 1                     |
| T2681R               | B14                   | MMS               | 10                         | 32.93                         | 2                     |
| WT                   | B14                   | MMS               | 10                         | 46.49                         | 1                     |
| T2681R               | B14                   | MMS               | 15                         | 12.02                         | 1                     |
| T2681R               | B14                   | MMS               | 15                         | 15.66                         | 2                     |
| WT                   | B14                   | MMS               | 15                         | 34.89                         | 1                     |
| T2681R               | B14                   | MMS               | 20                         | 4.49                          | 1                     |
| T2681R               | B14                   | MMS               | 20                         | 3.21                          | 2                     |
| WT                   | B14                   | MMS               | 20                         | 17.68                         | 1                     |
| T2681R               | B14                   | MMS               | 30                         | 1.88                          | 1                     |
| T2681R               | B14                   | MMS               | 30                         | 1.00                          | 2                     |
| WT                   | B14                   | MMS               | 30                         | 9.02                          | 1                     |
| T2681R               | B14                   | MMS               | 40                         | 2.19                          | 1                     |
| T2681R               | B14                   | MMS               | 40                         | 1.00                          | 2                     |

| Variant <sup>a</sup> | Batch ID <sup>b</sup> | Drug <sup>c</sup> | Concentration <sup>d</sup> | Percent Survived <sup>e</sup> | Clone ID <sup>f</sup> |
|----------------------|-----------------------|-------------------|----------------------------|-------------------------------|-----------------------|
| WT                   | B14                   | MMS               | 40                         | 4.45                          | 1                     |
| T2681R               | B14                   | Parp              | 0.01                       | 58.98                         | 1                     |
| T2681R               | B14                   | Parp              | 0.01                       | 46.04                         | 2                     |
| WT                   | B14                   | Parp              | 0.01                       | 58.12                         | 1                     |
| T2681R               | B14                   | Parp              | 0.1                        | 29.42                         | 1                     |
| T2681R               | B14                   | Parp              | 0.1                        | 25.93                         | 2                     |
| WT                   | B14                   | Parp              | 0.1                        | 50.61                         | 1                     |
| T2681R               | B14                   | Parp              | 1                          | 7.54                          | 1                     |
| T2681R               | B14                   | Parp              | 1                          | 8.46                          | 2                     |
| WT                   | B14                   | Parp              | 1                          | 24.58                         | 1                     |
| T2681R               | B14                   | Parp              | 10                         | 1.57                          | 1                     |
| T2681R               | B14                   | Parp              | 10                         | 6.92                          | 2                     |
| WT                   | B14                   | Parp              | 10                         | 6.14                          | 1                     |
| T2681R               | B14                   | IR                | 50                         | 91.36                         | 1                     |
| T2681R               | B14                   | IR                | 50                         | 94.13                         | 2                     |
| WT                   | B14                   | IR                | 50                         | 95.51                         | 1                     |
| T2681R               | B14                   | IR                | 100                        | 65.76                         | 1                     |
| T2681R               | B14                   | IR                | 100                        | 70.49                         | 2                     |
| WT                   | B14                   | IR                | 100                        | 71.47                         | 1                     |
| T2681R               | B14                   | IR                | 200                        | 57.02                         | 1                     |
| T2681R               | B14                   | IR                | 200                        | 65.19                         | 2                     |
| WT                   | B14                   | IR                | 200                        | 62.93                         | 1                     |
| T2681R               | B14                   | IR                | 400                        | 25.91                         | 1                     |
| T2681R               | B14                   | IR                | 400                        | 39.97                         | 2                     |
| WT                   | B14                   | IR                | 400                        | 34.62                         | 1                     |
| T2681R               | B14                   | IR                | 600                        | 16.55                         | 1                     |
| T2681R               | B14                   | IR                | 600                        | 26.36                         | 2                     |
| WT                   | B14                   | IR                | 600                        | 20.51                         | 1                     |
| S869L                | B15                   | Camp              | 2.5                        | 99.64                         | 1                     |
| S869L                | B15                   | Camp              | 2.5                        | 100.00                        | 2                     |
| WT                   | B15                   | Camp              | 2.5                        | 79.94                         | 1                     |
| S869L                | B15                   | Camp              | 5                          | 98.71                         | 1                     |
| S869L                | B15                   | Camp              | 5                          | 95.36                         | 2                     |
| WT                   | B15                   | Camp              | 5                          | 71.78                         | 1                     |
| S869L                | B15                   | Camp              | 25                         | 83.12                         | 1                     |
| S869L                | B15                   | Camp              | 25                         | 83.99                         | 2                     |
| WT                   | B15                   | Camp              | 25                         | 77.32                         | 1                     |
| S869L                | B15                   | Camp              | 50                         | 49.57                         | 1                     |
| S869L                | B15                   | Camp              | 50                         | 59.91                         | 2                     |
| WT                   | B15                   | Camp              | 50                         | 70.54                         | 1                     |

| Variant <sup>a</sup> | Batch ID <sup>b</sup> | Drug <sup>c</sup> | Concentration <sup>d</sup> | Percent Survived <sup>e</sup> | Clone ID <sup>f</sup> |
|----------------------|-----------------------|-------------------|----------------------------|-------------------------------|-----------------------|
| S869L                | B15                   | Camp              | 100                        | 16.67                         | 1                     |
| S869L                | B15                   | Camp              | 100                        | 17.80                         | 2                     |
| WT                   | B15                   | Camp              | 100                        | 36.65                         | 1                     |
| S869L                | B15                   | Camp              | 200                        | 3.09                          | 1                     |
| S869L                | B15                   | Camp              | 200                        | 3.74                          | 2                     |
| WT                   | B15                   | Camp              | 200                        | 15.21                         | 1                     |
| S869L                | B15                   | MMC               | 5                          | 88.12                         | 1                     |
| S869L                | B15                   | MMC               | 5                          | 68.76                         | 2                     |
| WT                   | B15                   | MMC               | 5                          | 60.65                         | 1                     |
| S869L                | B15                   | MMC               | 10                         | 70.47                         | 1                     |
| S869L                | B15                   | MMC               | 10                         | 66.65                         | 2                     |
| WT                   | B15                   | MMC               | 10                         | 51.06                         | 1                     |
| S869L                | B15                   | MMC               | 20                         | 64.52                         | 1                     |
| S869L                | B15                   | MMC               | 20                         | 55.78                         | 2                     |
| WT                   | B15                   | MMC               | 20                         | 32.11                         | 1                     |
| S869L                | B15                   | MMC               | 40                         | 59.51                         | 1                     |
| S869L                | B15                   | MMC               | 40                         | 30.34                         | 2                     |
| WT                   | B15                   | MMC               | 40                         | 14.39                         | 1                     |
| S869L                | B15                   | MMC               | 60                         | 25.91                         | 1                     |
| S869L                | B15                   | MMC               | 60                         | 12.45                         | 2                     |
| WT                   | B15                   | MMC               | 60                         | 10.00                         | 1                     |
| S869L                | B15                   | MMC               | 80                         | 15.13                         | 1                     |
| S869L                | B15                   | MMC               | 80                         | 6.29                          | 2                     |
| WT                   | B15                   | MMC               | 80                         | 7.32                          | 1                     |
| S869L                | B15                   | Cisp              | 0.2                        | 100.00                        | 1                     |
| S869L                | B15                   | Cisp              | 0.2                        | 68.81                         | 2                     |
| WT                   | B15                   | Cisp              | 0.2                        | 74.97                         | 1                     |
| S869L                | B15                   | Cisp              | 0.4                        | 57.97                         | 1                     |
| S869L                | B15                   | Cisp              | 0.4                        | 30.30                         | 2                     |
| WT                   | B15                   | Cisp              | 0.4                        | 18.27                         | 1                     |
| S869L                | B15                   | Cisp              | 0.6                        | 9.89                          | 1                     |
| S869L                | B15                   | Cisp              | 0.6                        | 4.87                          | 2                     |
| WT                   | B15                   | Cisp              | 0.6                        | 9.47                          | 1                     |
| S869L                | B15                   | Cisp              | 1                          | 22.06                         | 1                     |
| S869L                | B15                   | Cisp              | 1                          | 10.81                         | 2                     |
| WT                   | B15                   | Cisp              | 1                          | 12.58                         | 1                     |
| S869L                | B15                   | Cisp              | 1.2                        | 6.66                          | 1                     |
| S869L                | B15                   | Cisp              | 1.2                        | 5.17                          | 2                     |
| WT                   | B15                   | Cisp              | 1.2                        | 11.10                         | 1                     |
| S869L                | B15                   | Cisp              | 1.5                        | 8.07                          | 1                     |

| Variant <sup>a</sup> | Batch ID <sup>b</sup> | Drug <sup>c</sup> | Concentration <sup>d</sup> | Percent Survived <sup>e</sup> | Clone ID <sup>f</sup> |
|----------------------|-----------------------|-------------------|----------------------------|-------------------------------|-----------------------|
| S869L                | B15                   | Cisp              | 1.5                        | 4.46                          | 2                     |
| WT                   | B15                   | Cisp              | 1.5                        | 12.04                         | 1                     |
| S869L                | B15                   | MMS               | 5                          | 91.20                         | 1                     |
| S869L                | B15                   | MMS               | 5                          | 91.93                         | 2                     |
| WT                   | B15                   | MMS               | 5                          | 76.72                         | 1                     |
| S869L                | B15                   | MMS               | 10                         | 87.45                         | 1                     |
| S869L                | B15                   | MMS               | 10                         | 79.33                         | 2                     |
| WT                   | B15                   | MMS               | 10                         | 63.60                         | 1                     |
| S869L                | B15                   | MMS               | 15                         | 58.72                         | 1                     |
| S869L                | B15                   | MMS               | 15                         | 58.48                         | 2                     |
| WT                   | B15                   | MMS               | 15                         | 45.83                         | 1                     |
| S869L                | B15                   | MMS               | 20                         | 30.55                         | 1                     |
| S869L                | B15                   | MMS               | 20                         | 30.08                         | 2                     |
| WT                   | B15                   | MMS               | 20                         | 23.65                         | 1                     |
| S869L                | B15                   | MMS               | 30                         | 2.44                          | 1                     |
| S869L                | B15                   | MMS               | 30                         | 2.85                          | 2                     |
| WT                   | B15                   | MMS               | 30                         | 5.15                          | 1                     |
| S869L                | B15                   | MMS               | 40                         | 1.00                          | 1                     |
| S869L                | B15                   | MMS               | 40                         | 1.00                          | 2                     |
| WT                   | B15                   | MMS               | 40                         | 3.06                          | 1                     |
| S869L                | B15                   | Parp              | 0.01                       | 79.95                         | 1                     |
| S869L                | B15                   | Parp              | 0.01                       | 74.52                         | 2                     |
| WT                   | B15                   | Parp              | 0.01                       | 88.13                         | 1                     |
| S869L                | B15                   | Parp              | 0.1                        | 56.80                         | 1                     |
| S869L                | B15                   | Parp              | 0.1                        | 55.34                         | 2                     |
| WT                   | B15                   | Parp              | 0.1                        | 59.61                         | 1                     |
| S869L                | B15                   | Parp              | 1                          | 23.78                         | 1                     |
| S869L                | B15                   | Parp              | 1                          | 33.87                         | 2                     |
| WT                   | B15                   | Parp              | 1                          | 38.13                         | 1                     |
| S869L                | B15                   | Parp              | 10                         | 2.10                          | 1                     |
| S869L                | B15                   | Parp              | 10                         | 1.77                          | 2                     |
| WT                   | B15                   | Parp              | 10                         | 2.10                          | 1                     |
| S869L                | B15                   | IR                | 50                         | 87.88                         | 1                     |
| S869L                | B15                   | IR                | 50                         | 99.25                         | 2                     |
| WT                   | B15                   | IR                | 50                         | 93.55                         | 1                     |
| S869L                | B15                   | IR                | 100                        | 73.82                         | 1                     |
| S869L                | B15                   | IR                | 100                        | 82.31                         | 2                     |
| WT                   | B15                   | IR                | 100                        | 78.21                         | 1                     |
| S869L                | B15                   | IR                | 200                        | 76.96                         | 1                     |
| S869L                | B15                   | IR                | 200                        | 76.25                         | 2                     |

| Variant <sup>a</sup> | Batch ID <sup>b</sup> | Drug <sup>c</sup> | Concentration <sup>d</sup> | Percent Survived <sup>e</sup> | Clone ID <sup>f</sup> |
|----------------------|-----------------------|-------------------|----------------------------|-------------------------------|-----------------------|
| WT                   | B15                   | IR                | 200                        | 84.45                         | 1                     |
| S869L                | B15                   | IR                | 400                        | 49.86                         | 1                     |
| S869L                | B15                   | IR                | 400                        | 54.99                         | 2                     |
| WT                   | B15                   | IR                | 400                        | 62.30                         | 1                     |
| S869L                | B15                   | IR                | 600                        | 32.90                         | 1                     |
| S869L                | B15                   | IR                | 600                        | 34.81                         | 2                     |
| WT                   | B15                   | IR                | 600                        | 44.77                         | 1                     |
| G1529R               | B16                   | Camp              | 2.5                        | 100.00                        | 1                     |
| G1529R               | B16                   | Camp              | 2.5                        | 100.00                        | 2                     |
| WT                   | B16                   | Camp              | 2.5                        | 79.94                         | 1                     |
| G1529R               | B16                   | Camp              | 5                          | 97.85                         | 1                     |
| G1529R               | B16                   | Camp              | 5                          | 94.55                         | 2                     |
| WT                   | B16                   | Camp              | 5                          | 71.78                         | 1                     |
| G1529R               | B16                   | Camp              | 25                         | 84.26                         | 1                     |
| G1529R               | B16                   | Camp              | 25                         | 95.45                         | 2                     |
| WT                   | B16                   | Camp              | 25                         | 77.32                         | 1                     |
| G1529R               | B16                   | Camp              | 50                         | 66.74                         | 1                     |
| G1529R               | B16                   | Camp              | 50                         | 78.08                         | 2                     |
| WT                   | B16                   | Camp              | 50                         | 70.54                         | 1                     |
| G1529R               | B16                   | Camp              | 100                        | 39.05                         | 1                     |
| G1529R               | B16                   | Camp              | 100                        | 42.68                         | 2                     |
| WT                   | B16                   | Camp              | 100                        | 36.65                         | 1                     |
| G1529R               | B16                   | Camp              | 200                        | 5.49                          | 1                     |
| G1529R               | B16                   | Camp              | 200                        | 15.52                         | 2                     |
| WT                   | B16                   | Camp              | 200                        | 15.21                         | 1                     |
| G1529R               | B16                   | MMC               | 5                          | 92.40                         | 1                     |
| G1529R               | B16                   | MMC               | 5                          | 95.46                         | 2                     |
| WT                   | B16                   | MMC               | 5                          | 60.65                         | 1                     |
| G1529R               | B16                   | MMC               | 10                         | 89.56                         | 1                     |
| G1529R               | B16                   | MMC               | 10                         | 68.80                         | 2                     |
| WT                   | B16                   | MMC               | 10                         | 51.06                         | 1                     |
| G1529R               | B16                   | MMC               | 20                         | 77.05                         | 1                     |
| G1529R               | B16                   | MMC               | 20                         | 72.90                         | 2                     |
| WT                   | B16                   | MMC               | 20                         | 32.11                         | 1                     |
| G1529R               | B16                   | MMC               | 40                         | 53.73                         | 1                     |
| G1529R               | B16                   | MMC               | 40                         | 54.61                         | 2                     |
| WT                   | B16                   | MMC               | 40                         | 14.39                         | 1                     |
| G1529R               | B16                   | MMC               | 60                         | 28.72                         | 1                     |
| G1529R               | B16                   | MMC               | 60                         | 26.57                         | 2                     |
| WT                   | B16                   | MMC               | 60                         | 10.00                         | 1                     |



| Variant <sup>a</sup> | Batch ID <sup>b</sup> | Drug <sup>c</sup> | Concentration <sup>d</sup> | Percent Survived <sup>e</sup> | Clone ID <sup>f</sup> |
|----------------------|-----------------------|-------------------|----------------------------|-------------------------------|-----------------------|
| G1529R               | B16                   | MMC               | 80                         | 15.48                         | 1                     |
| G1529R               | B16                   | MMC               | 80                         | 11.57                         | 2                     |
| WT                   | B16                   | MMC               | 80                         | 7.32                          | 1                     |
| G1529R               | B16                   | Cisp              | 0.2                        | 85.17                         | 1                     |
| G1529R               | B16                   | Cisp              | 0.2                        | 90.61                         | 2                     |
| WT                   | B16                   | Cisp              | 0.2                        | 74.97                         | 1                     |
| G1529R               | B16                   | Cisp              | 0.4                        | 43.33                         | 1                     |
| G1529R               | B16                   | Cisp              | 0.4                        | 57.96                         | 2                     |
| WT                   | B16                   | Cisp              | 0.4                        | 18.27                         | 1                     |
| G1529R               | B16                   | Cisp              | 0.6                        | 6.03                          | 1                     |
| G1529R               | B16                   | Cisp              | 0.6                        | 6.97                          | 2                     |
| WT                   | B16                   | Cisp              | 0.6                        | 9.47                          | 1                     |
| G1529R               | B16                   | Cisp              | 1                          | 17.74                         | 1                     |
| G1529R               | B16                   | Cisp              | 1                          | 27.74                         | 2                     |
| WT                   | B16                   | Cisp              | 1                          | 12.58                         | 1                     |
| G1529R               | B16                   | Cisp              | 1.2                        | 6.43                          | 1                     |
| G1529R               | B16                   | Cisp              | 1.2                        | 6.90                          | 2                     |
| WT                   | B16                   | Cisp              | 1.2                        | 11.10                         | 1                     |
| G1529R               | B16                   | Cisp              | 1.5                        | 5.96                          | 1                     |
| G1529R               | B16                   | Cisp              | 1.5                        | 6.53                          | 2                     |
| WT                   | B16                   | Cisp              | 1.5                        | 12.04                         | 1                     |
| G1529R               | B16                   | MMS               | 5                          | 94.80                         | 1                     |
| G1529R               | B16                   | MMS               | 5                          | 99.77                         | 2                     |
| WT                   | B16                   | MMS               | 5                          | 76.72                         | 1                     |
| G1529R               | B16                   | MMS               | 10                         | 88.43                         | 1                     |
| G1529R               | B16                   | MMS               | 10                         | 99.31                         | 2                     |
| WT                   | B16                   | MMS               | 10                         | 63.60                         | 1                     |
| G1529R               | B16                   | MMS               | 15                         | 72.43                         | 1                     |
| G1529R               | B16                   | MMS               | 15                         | 84.58                         | 2                     |
| WT                   | B16                   | MMS               | 15                         | 45.83                         | 1                     |
| G1529R               | B16                   | MMS               | 20                         | 50.78                         | 1                     |
| G1529R               | B16                   | MMS               | 20                         | 69.92                         | 2                     |
| WT                   | B16                   | MMS               | 20                         | 23.65                         | 1                     |
| G1529R               | B16                   | MMS               | 30                         | 9.75                          | 1                     |
| G1529R               | B16                   | MMS               | 30                         | 13.51                         | 2                     |
| WT                   | B16                   | MMS               | 30                         | 5.15                          | 1                     |
| G1529R               | B16                   | MMS               | 40                         | 2.10                          | 1                     |
| G1529R               | B16                   | MMS               | 40                         | 1.67                          | 2                     |
| WT                   | B16                   | MMS               | 40                         | 3.06                          | 1                     |
| G1529R               | B16                   | Parp              | 0.01                       | 78.99                         | 1                     |

| Variant <sup>a</sup> | Batch ID <sup>b</sup> | Drug <sup>c</sup> | Concentration <sup>d</sup> | Percent Survived <sup>e</sup> | Clone ID <sup>f</sup> |
|----------------------|-----------------------|-------------------|----------------------------|-------------------------------|-----------------------|
| G1529R               | B16                   | Parp              | 0.01                       | 62.49                         | 2                     |
| WT                   | B16                   | Parp              | 0.01                       | 88.13                         | 1                     |
| G1529R               | B16                   | Parp              | 0.1                        | 62.82                         | 1                     |
| G1529R               | B16                   | Parp              | 0.1                        | 37.61                         | 2                     |
| WT                   | B16                   | Parp              | 0.1                        | 59.61                         | 1                     |
| G1529R               | B16                   | Parp              | 1                          | 38.12                         | 1                     |
| G1529R               | B16                   | Parp              | 1                          | 9.77                          | 2                     |
| WT                   | B16                   | Parp              | 1                          | 38.13                         | 1                     |
| G1529R               | B16                   | Parp              | 10                         | 2.52                          | 1                     |
| G1529R               | B16                   | Parp              | 10                         | 1.37                          | 2                     |
| WT                   | B16                   | Parp              | 10                         | 2.10                          | 1                     |
| G1529R               | B16                   | IR                | 50                         | 92.30                         | 1                     |
| G1529R               | B16                   | IR                | 50                         | 91.90                         | 2                     |
| WT                   | B16                   | IR                | 50                         | 93.55                         | 1                     |
| G1529R               | B16                   | IR                | 100                        | 85.24                         | 1                     |
| G1529R               | B16                   | IR                | 100                        | 75.13                         | 2                     |
| WT                   | B16                   | IR                | 100                        | 78.21                         | 1                     |
| G1529R               | B16                   | IR                | 200                        | 70.30                         | 1                     |
| G1529R               | B16                   | IR                | 200                        | 86.16                         | 2                     |
| WT                   | B16                   | IR                | 200                        | 84.45                         | 1                     |
| G1529R               | B16                   | IR                | 400                        | 54.20                         | 1                     |
| G1529R               | B16                   | IR                | 400                        | 57.78                         | 2                     |
| WT                   | B16                   | IR                | 400                        | 62.30                         | 1                     |
| G1529R               | B16                   | IR                | 600                        | 39.25                         | 1                     |
| G1529R               | B16                   | IR                | 600                        | 42.58                         | 2                     |
| WT                   | B16                   | IR                | 600                        | 44.77                         | 1                     |
| F1524V               | B17                   | Camp              | 2.5                        | 100.00                        | 1                     |
| F1524V               | B17                   | Camp              | 2.5                        | 100.00                        | 2                     |
| WT                   | B17                   | Camp              | 2.5                        | 79.94                         | 1                     |
| F1524V               | B17                   | Camp              | 5                          | 100.00                        | 1                     |
| F1524V               | B17                   | Camp              | 5                          | 90.37                         | 2                     |
| WT                   | B17                   | Camp              | 5                          | 71.78                         | 1                     |
| F1524V               | B17                   | Camp              | 25                         | 100.00                        | 1                     |
| F1524V               | B17                   | Camp              | 25                         | 82.20                         | 2                     |
| WT                   | B17                   | Camp              | 25                         | 77.32                         | 1                     |
| F1524V               | B17                   | Camp              | 50                         | 75.89                         | 1                     |
| F1524V               | B17                   | Camp              | 50                         | 66.25                         | 2                     |
| WT                   | B17                   | Camp              | 50                         | 70.54                         | 1                     |
| F1524V               | B17                   | Camp              | 100                        | 28.68                         | 1                     |
| F1524V               | B17                   | Camp              | 100                        | 36.28                         | 2                     |

| Variant <sup>a</sup> | Batch ID <sup>b</sup> | Drug <sup>c</sup> | Concentration <sup>d</sup> | Percent Survived <sup>e</sup> | Clone ID <sup>f</sup> |
|----------------------|-----------------------|-------------------|----------------------------|-------------------------------|-----------------------|
| WT                   | B17                   | Camp              | 100                        | 36.65                         | 1                     |
| F1524V               | B17                   | Camp              | 200                        | 4.01                          | 1                     |
| F1524V               | B17                   | Camp              | 200                        | 6.91                          | 2                     |
| WT                   | B17                   | Camp              | 200                        | 15.21                         | 1                     |
| F1524V               | B17                   | MMC               | 5                          | 100.00                        | 1                     |
| F1524V               | B17                   | MMC               | 5                          | 80.96                         | 2                     |
| WT                   | B17                   | MMC               | 5                          | 60.65                         | 1                     |
| F1524V               | B17                   | MMC               | 10                         | 96.99                         | 1                     |
| F1524V               | B17                   | MMC               | 10                         | 75.26                         | 2                     |
| WT                   | B17                   | MMC               | 10                         | 51.06                         | 1                     |
| F1524V               | B17                   | MMC               | 20                         | 80.53                         | 1                     |
| F1524V               | B17                   | MMC               | 20                         | 54.45                         | 2                     |
| WT                   | B17                   | MMC               | 20                         | 32.11                         | 1                     |
| F1524V               | B17                   | MMC               | 40                         | 58.50                         | 1                     |
| F1524V               | B17                   | MMC               | 40                         | 32.00                         | 2                     |
| WT                   | B17                   | MMC               | 40                         | 14.39                         | 1                     |
| F1524V               | B17                   | MMC               | 60                         | 44.60                         | 1                     |
| F1524V               | B17                   | MMC               | 60                         | 15.45                         | 2                     |
| WT                   | B17                   | MMC               | 60                         | 10.00                         | 1                     |
| F1524V               | B17                   | MMC               | 80                         | 19.66                         | 1                     |
| F1524V               | B17                   | MMC               | 80                         | 7.00                          | 2                     |
| WT                   | B17                   | MMC               | 80                         | 7.32                          | 1                     |
| F1524V               | B17                   | Cisp              | 0.2                        | 94.90                         | 1                     |
| F1524V               | B17                   | Cisp              | 0.2                        | 77.70                         | 2                     |
| WT                   | B17                   | Cisp              | 0.2                        | 74.97                         | 1                     |
| F1524V               | B17                   | Cisp              | 0.4                        | 62.02                         | 1                     |
| F1524V               | B17                   | Cisp              | 0.4                        | 24.47                         | 2                     |
| WT                   | B17                   | Cisp              | 0.4                        | 18.27                         | 1                     |
| F1524V               | B17                   | Cisp              | 0.6                        | 12.64                         | 1                     |
| F1524V               | B17                   | Cisp              | 0.6                        | 8.03                          | 2                     |
| WT                   | B17                   | Cisp              | 0.6                        | 9.47                          | 1                     |
| F1524V               | B17                   | Cisp              | 1                          | 38.87                         | 1                     |
| F1524V               | B17                   | Cisp              | 1                          | 12.31                         | 2                     |
| WT                   | B17                   | Cisp              | 1                          | 12.58                         | 1                     |
| F1524V               | B17                   | Cisp              | 1.2                        | 9.44                          | 1                     |
| F1524V               | B17                   | Cisp              | 1.2                        | 6.98                          | 2                     |
| WT                   | B17                   | Cisp              | 1.2                        | 11.10                         | 1                     |
| F1524V               | B17                   | Cisp              | 1.5                        | 8.96                          | 1                     |
| F1524V               | B17                   | Cisp              | 1.5                        | 7.96                          | 2                     |
| WT                   | B17                   | Cisp              | 1.5                        | 12.04                         | 1                     |

| Variant <sup>a</sup> | Batch ID <sup>b</sup> | Drug <sup>c</sup> | Concentration <sup>d</sup> | Percent Survived <sup>e</sup> | Clone ID <sup>f</sup> |
|----------------------|-----------------------|-------------------|----------------------------|-------------------------------|-----------------------|
| F1524V               | B17                   | MMS               | 5                          | 100.00                        | 1                     |
| F1524V               | B17                   | MMS               | 5                          | 84.73                         | 2                     |
| WT                   | B17                   | MMS               | 5                          | 76.72                         | 1                     |
| F1524V               | B17                   | MMS               | 10                         | 86.93                         | 1                     |
| F1524V               | B17                   | MMS               | 10                         | 74.09                         | 2                     |
| WT                   | B17                   | MMS               | 10                         | 63.60                         | 1                     |
| F1524V               | B17                   | MMS               | 15                         | 60.79                         | 1                     |
| F1524V               | B17                   | MMS               | 15                         | 57.45                         | 2                     |
| WT                   | B17                   | MMS               | 15                         | 45.83                         | 1                     |
| F1524V               | B17                   | MMS               | 20                         | 34.43                         | 1                     |
| F1524V               | B17                   | MMS               | 20                         | 38.60                         | 2                     |
| WT                   | B17                   | MMS               | 20                         | 23.65                         | 1                     |
| F1524V               | B17                   | MMS               | 30                         | 2.50                          | 1                     |
| F1524V               | B17                   | MMS               | 30                         | 8.66                          | 2                     |
| WT                   | B17                   | MMS               | 30                         | 5.15                          | 1                     |
| F1524V               | B17                   | MMS               | 40                         | 1.00                          | 1                     |
| F1524V               | B17                   | MMS               | 40                         | 1.90                          | 2                     |
| WT                   | B17                   | MMS               | 40                         | 3.06                          | 1                     |
| F1524V               | B17                   | Parp              | 0.01                       | 48.75                         | 1                     |
| F1524V               | B17                   | Parp              | 0.01                       | 85.16                         | 2                     |
| WT                   | B17                   | Parp              | 0.01                       | 88.13                         | 1                     |
| F1524V               | B17                   | Parp              | 0.1                        | 11.44                         | 1                     |
| F1524V               | B17                   | Parp              | 0.1                        | 62.64                         | 2                     |
| WT                   | B17                   | Parp              | 0.1                        | 59.61                         | 1                     |
| F1524V               | B17                   | Parp              | 1                          | 1.39                          | 1                     |
| F1524V               | B17                   | Parp              | 1                          | 27.93                         | 2                     |
| WT                   | B17                   | Parp              | 1                          | 38.13                         | 1                     |
| F1524V               | B17                   | Parp              | 10                         | 1.00                          | 1                     |
| F1524V               | B17                   | Parp              | 10                         | 1.75                          | 2                     |
| WT                   | B17                   | Parp              | 10                         | 2.10                          | 1                     |
| F1524V               | B17                   | IR                | 50                         | 78.60                         | 1                     |
| F1524V               | B17                   | IR                | 50                         | 88.17                         | 2                     |
| WT                   | B17                   | IR                | 50                         | 93.55                         | 1                     |
| F1524V               | B17                   | IR                | 100                        | 75.99                         | 1                     |
| F1524V               | B17                   | IR                | 100                        | 64.93                         | 2                     |
| WT                   | B17                   | IR                | 100                        | 78.21                         | 1                     |
| F1524V               | B17                   | IR                | 200                        | 65.76                         | 1                     |
| F1524V               | B17                   | IR                | 200                        | 73.11                         | 2                     |
| WT                   | B17                   | IR                | 200                        | 84.45                         | 1                     |
| F1524V               | B17                   | IR                | 400                        | 51.13                         | 1                     |

| Variant <sup>a</sup> | Batch ID <sup>b</sup> | Drug <sup>c</sup> | Concentration <sup>d</sup> | Percent Survived <sup>e</sup> | Clone ID <sup>f</sup> |
|----------------------|-----------------------|-------------------|----------------------------|-------------------------------|-----------------------|
| F1524V               | B17                   | IR                | 400                        | 47.34                         | 2                     |
| WT                   | B17                   | IR                | 400                        | 62.30                         | 1                     |
| F1524V               | B17                   | IR                | 600                        | 30.36                         | 1                     |
| F1524V               | B17                   | IR                | 600                        | 33.64                         | 2                     |
| WT                   | B17                   | IR                | 600                        | 44.77                         | 1                     |
| R2336L               | B18                   | Camp              | 2.5                        | 98.05                         | 1                     |
| R2336L               | B18                   | Camp              | 2.5                        | 76.80                         | 2                     |
| WT                   | B18                   | Camp              | 2.5                        | 78.21                         | 1                     |
| R2336L               | B18                   | Camp              | 5                          | 64.45                         | 1                     |
| R2336L               | B18                   | Camp              | 5                          | 30.09                         | 2                     |
| WT                   | B18                   | Camp              | 5                          | 45.76                         | 1                     |
| R2336L               | B18                   | Camp              | 25                         | 47.53                         | 1                     |
| R2336L               | B18                   | Camp              | 25                         | 22.73                         | 2                     |
| WT                   | B18                   | Camp              | 25                         | 43.43                         | 1                     |
| R2336L               | B18                   | Camp              | 50                         | 23.96                         | 1                     |
| R2336L               | B18                   | Camp              | 50                         | 15.05                         | 2                     |
| WT                   | B18                   | Camp              | 50                         | 29.24                         | 1                     |
| R2336L               | B18                   | Camp              | 100                        | 13.80                         | 1                     |
| R2336L               | B18                   | Camp              | 100                        | 12.38                         | 2                     |
| WT                   | B18                   | Camp              | 100                        | 14.13                         | 1                     |
| R2336L               | B18                   | Camp              | 200                        | 9.38                          | 1                     |
| R2336L               | B18                   | Camp              | 200                        | 10.19                         | 2                     |
| WT                   | B18                   | Camp              | 200                        | 4.45                          | 1                     |
| R2336L               | B18                   | MMC               | 5                          | 70.68                         | 1                     |
| R2336L               | B18                   | MMC               | 5                          | 59.40                         | 2                     |
| WT                   | B18                   | MMC               | 5                          | 84.14                         | 1                     |
| R2336L               | B18                   | MMC               | 10                         | 43.15                         | 1                     |
| R2336L               | B18                   | MMC               | 10                         | 26.06                         | 2                     |
| WT                   | B18                   | MMC               | 10                         | 76.52                         | 1                     |
| R2336L               | B18                   | MMC               | 20                         | 24.11                         | 1                     |
| R2336L               | B18                   | MMC               | 20                         | 13.48                         | 2                     |
| WT                   | B18                   | MMC               | 20                         | 66.53                         | 1                     |
| R2336L               | B18                   | MMC               | 40                         | 11.92                         | 1                     |
| R2336L               | B18                   | MMC               | 40                         | 11.88                         | 2                     |
| WT                   | B18                   | MMC               | 40                         | 46.84                         | 1                     |
| R2336L               | B18                   | MMC               | 60                         | 7.26                          | 1                     |
| R2336L               | B18                   | MMC               | 60                         | 8.69                          | 2                     |
| WT                   | B18                   | MMC               | 60                         | 30.36                         | 1                     |
| R2336L               | B18                   | MMC               | 80                         | 9.32                          | 1                     |
| R2336L               | B18                   | MMC               | 80                         | 9.75                          | 2                     |

| Variant <sup>a</sup> | Batch ID <sup>b</sup> | Drug <sup>c</sup> | Concentration <sup>d</sup> | Percent Survived <sup>e</sup> | Clone ID <sup>f</sup> |
|----------------------|-----------------------|-------------------|----------------------------|-------------------------------|-----------------------|
| WT                   | B18                   | MMC               | 80                         | 19.07                         | 1                     |
| R2336L               | B18                   | Cisp              | 0.2                        | 61.67                         | 2                     |
| WT                   | B18                   | Cisp              | 0.2                        | 79.51                         | 1                     |
| R2336L               | B18                   | Cisp              | 0.4                        | 32.27                         | 2                     |
| WT                   | B18                   | Cisp              | 0.4                        | 68.21                         | 1                     |
| R2336L               | B18                   | Cisp              | 0.6                        | 19.17                         | 2                     |
| WT                   | B18                   | Cisp              | 0.6                        | 48.69                         | 1                     |
| R2336L               | B18                   | Cisp              | 1                          | 11.02                         | 2                     |
| WT                   | B18                   | Cisp              | 1                          | 29.47                         | 1                     |
| R2336L               | B18                   | Cisp              | 1.2                        | 8.54                          | 2                     |
| WT                   | B18                   | Cisp              | 1.2                        | 17.28                         | 1                     |
| R2336L               | B18                   | Cisp              | 1.5                        | 5.96                          | 2                     |
| WT                   | B18                   | Cisp              | 1.5                        | 15.48                         | 1                     |
| R2336L               | B18                   | Cisp              | 0.2                        | 24.25                         | 1                     |
| WT                   | B18                   | Cisp              | 0.2                        | 65.69                         | 1                     |
| R2336L               | B18                   | Cisp              | 0.4                        | 13.58                         | 1                     |
| WT                   | B18                   | Cisp              | 0.4                        | 27.71                         | 1                     |
| R2336L               | B18                   | Cisp              | 0.6                        | 13.74                         | 1                     |
| WT                   | B18                   | Cisp              | 0.6                        | 19.51                         | 1                     |
| R2336L               | B18                   | Cisp              | 1                          | 7.45                          | 1                     |
| WT                   | B18                   | Cisp              | 1                          | 7.40                          | 1                     |
| R2336L               | B18                   | Cisp              | 1.2                        | 5.13                          | 1                     |
| WT                   | B18                   | Cisp              | 1.2                        | 6.73                          | 1                     |
| R2336L               | B18                   | Cisp              | 1.5                        | 7.20                          | 1                     |
| WT                   | B18                   | Cisp              | 1.5                        | 6.67                          | 1                     |
| R2336L               | B18                   | MMS               | 5                          | 71.00                         | 1                     |
| R2336L               | B18                   | MMS               | 5                          | 63.42                         | 2                     |
| WT                   | B18                   | MMS               | 5                          | 75.79                         | 1                     |
| R2336L               | B18                   | MMS               | 10                         | 40.08                         | 1                     |
| R2336L               | B18                   | MMS               | 10                         | 25.56                         | 2                     |
| WT                   | B18                   | MMS               | 10                         | 56.59                         | 1                     |
| R2336L               | B18                   | MMS               | 15                         | 20.38                         | 1                     |
| R2336L               | B18                   | MMS               | 15                         | 11.02                         | 2                     |
| WT                   | B18                   | MMS               | 15                         | 45.40                         | 1                     |
| R2336L               | B18                   | MMS               | 20                         | 11.49                         | 1                     |
| R2336L               | B18                   | MMS               | 20                         | 7.51                          | 2                     |
| WT                   | B18                   | MMS               | 20                         | 29.64                         | 1                     |
| R2336L               | B18                   | MMS               | 30                         | 5.06                          | 1                     |
| R2336L               | B18                   | MMS               | 30                         | 3.35                          | 2                     |
| WT                   | B18                   | MMS               | 30                         | 12.64                         | 1                     |

| Variant <sup>a</sup> | Batch ID <sup>b</sup> | Drug <sup>c</sup> | Concentration <sup>d</sup> | Percent Survived <sup>e</sup> | Clone ID <sup>f</sup> |
|----------------------|-----------------------|-------------------|----------------------------|-------------------------------|-----------------------|
| R2336L               | B18                   | MMS               | 40                         | 4.10                          | 1                     |
| R2336L               | B18                   | MMS               | 40                         | 3.35                          | 2                     |
| WT                   | B18                   | MMS               | 40                         | 4.46                          | 1                     |
| R2336L               | B18                   | Parp              | 0.01                       | 81.12                         | 1                     |
| R2336L               | B18                   | Parp              | 0.01                       | 55.35                         | 2                     |
| WT                   | B18                   | Parp              | 0.01                       | 88.62                         | 1                     |
| R2336L               | B18                   | Parp              | 0.1                        | 34.31                         | 1                     |
| R2336L               | B18                   | Parp              | 0.1                        | 20.66                         | 2                     |
| WT                   | B18                   | Parp              | 0.1                        | 78.48                         | 1                     |
| R2336L               | B18                   | Parp              | 1                          | 13.83                         | 1                     |
| R2336L               | B18                   | Parp              | 1                          | 12.37                         | 2                     |
| WT                   | B18                   | Parp              | 1                          | 64.12                         | 1                     |
| R2336L               | B18                   | Parp              | 10                         | 8.38                          | 1                     |
| R2336L               | B18                   | Parp              | 10                         | 10.11                         | 2                     |
| WT                   | B18                   | Parp              | 10                         | 6.05                          | 1                     |
| R2336L               | B18                   | IR                | 50                         | 97.45                         | 1                     |
| R2336L               | B18                   | IR                | 50                         | 93.56                         | 2                     |
| WT                   | B18                   | IR                | 50                         | 92.35                         | 1                     |
| R2336L               | B18                   | IR                | 100                        | 94.09                         | 1                     |
| R2336L               | B18                   | IR                | 100                        | 97.38                         | 2                     |
| WT                   | B18                   | IR                | 100                        | 97.06                         | 1                     |
| R2336L               | B18                   | IR                | 200                        | 64.30                         | 1                     |
| R2336L               | B18                   | IR                | 200                        | 62.37                         | 2                     |
| WT                   | B18                   | IR                | 200                        | 83.43                         | 1                     |
| R2336L               | B18                   | IR                | 400                        | 23.36                         | 1                     |
| R2336L               | B18                   | IR                | 400                        | 38.43                         | 2                     |
| WT                   | B18                   | IR                | 400                        | 12.29                         | 1                     |
| R2336L               | B18                   | IR                | 600                        | 26.98                         | 1                     |
| R2336L               | B18                   | IR                | 600                        | 35.81                         | 2                     |
| WT                   | B18                   | IR                | 600                        | 32.17                         | 1                     |
| D2312V               | B19                   | Camp              | 2.5                        | 100.00                        | 1                     |
| D2312V               | B19                   | Camp              | 2.5                        | 100.00                        | 2                     |
| WT                   | B19                   | Camp              | 2.5                        | 91.96                         | 1                     |
| D2312V               | B19                   | Camp              | 5                          | 100.00                        | 1                     |
| D2312V               | B19                   | Camp              | 5                          | 98.69                         | 2                     |
| WT                   | B19                   | Camp              | 5                          | 87.83                         | 1                     |
| D2312V               | B19                   | Camp              | 25                         | 75.32                         | 1                     |
| D2312V               | B19                   | Camp              | 25                         | 83.63                         | 2                     |
| WT                   | B19                   | Camp              | 25                         | 65.09                         | 1                     |
| D2312V               | B19                   | Camp              | 50                         | 42.23                         | 1                     |

| Variant <sup>a</sup> | Batch ID <sup>b</sup> | Drug <sup>c</sup> | Concentration <sup>d</sup> | Percent Survived <sup>e</sup> | Clone ID <sup>f</sup> |
|----------------------|-----------------------|-------------------|----------------------------|-------------------------------|-----------------------|
| D2312V               | B19                   | Camp              | 50                         | 40.60                         | 2                     |
| WT                   | B19                   | Camp              | 50                         | 40.00                         | 1                     |
| D2312V               | B19                   | Camp              | 100                        | 11.30                         | 1                     |
| D2312V               | B19                   | Camp              | 100                        | 13.33                         | 2                     |
| WT                   | B19                   | Camp              | 100                        | 10.00                         | 1                     |
| D2312V               | B19                   | Camp              | 200                        | 4.79                          | 1                     |
| D2312V               | B19                   | Camp              | 200                        | 3.10                          | 2                     |
| WT                   | B19                   | Camp              | 200                        | 2.83                          | 1                     |
| D2312V               | B19                   | MMC               | 5                          | 81.14                         | 1                     |
| D2312V               | B19                   | MMC               | 5                          | 72.18                         | 2                     |
| WT                   | B19                   | MMC               | 5                          | 81.12                         | 1                     |
| D2312V               | B19                   | MMC               | 10                         | 58.73                         | 1                     |
| D2312V               | B19                   | MMC               | 10                         | 62.78                         | 2                     |
| WT                   | B19                   | MMC               | 10                         | 69.00                         | 1                     |
| D2312V               | B19                   | MMC               | 20                         | 42.78                         | 1                     |
| D2312V               | B19                   | MMC               | 20                         | 37.98                         | 2                     |
| WT                   | B19                   | MMC               | 20                         | 53.11                         | 1                     |
| D2312V               | B19                   | MMC               | 40                         | 23.61                         | 1                     |
| D2312V               | B19                   | MMC               | 40                         | 17.48                         | 2                     |
| WT                   | B19                   | MMC               | 40                         | 30.51                         | 1                     |
| D2312V               | B19                   | MMC               | 60                         | 12.72                         | 1                     |
| D2312V               | B19                   | MMC               | 60                         | 9.23                          | 2                     |
| WT                   | B19                   | MMC               | 60                         | 13.09                         | 1                     |
| D2312V               | B19                   | MMC               | 80                         | 6.65                          | 1                     |
| D2312V               | B19                   | MMC               | 80                         | 6.04                          | 2                     |
| WT                   | B19                   | MMC               | 80                         | 9.32                          | 1                     |
| D2312V               | B19                   | Cisp              | 0.2                        | 88.09                         | 1                     |
| D2312V               | B19                   | Cisp              | 0.2                        | 93.65                         | 2                     |
| WT                   | B19                   | Cisp              | 0.2                        | 100.00                        | 1                     |
| D2312V               | B19                   | Cisp              | 0.4                        | 80.91                         | 1                     |
| D2312V               | B19                   | Cisp              | 0.4                        | 78.52                         | 2                     |
| WT                   | B19                   | Cisp              | 0.4                        | 89.06                         | 1                     |
| D2312V               | B19                   | Cisp              | 0.6                        | 76.56                         | 1                     |
| D2312V               | B19                   | Cisp              | 0.6                        | 73.27                         | 2                     |
| WT                   | B19                   | Cisp              | 0.6                        | 81.83                         | 1                     |
| D2312V               | B19                   | Cisp              | 1                          | 52.85                         | 1                     |
| D2312V               | B19                   | Cisp              | 1                          | 56.49                         | 2                     |
| WT                   | B19                   | Cisp              | 1                          | 67.63                         | 1                     |
| D2312V               | B19                   | Cisp              | 1.2                        | 43.18                         | 1                     |
| D2312V               | B19                   | Cisp              | 1.2                        | 50.41                         | 2                     |



| Variant <sup>a</sup> | Batch ID <sup>b</sup> | Drug <sup>c</sup> | Concentration <sup>d</sup> | Percent Survived <sup>e</sup> | Clone ID <sup>f</sup> |
|----------------------|-----------------------|-------------------|----------------------------|-------------------------------|-----------------------|
| WT                   | B19                   | Cisp              | 1.2                        | 60.96                         | 1                     |
| D2312V               | B19                   | Cisp              | 1.5                        | 31.05                         | 1                     |
| D2312V               | B19                   | Cisp              | 1.5                        | 37.93                         | 2                     |
| WT                   | B19                   | Cisp              | 1.5                        | 45.14                         | 1                     |
| D2312V               | B19                   | MMS               | 5                          | 100.00                        | 1                     |
| D2312V               | B19                   | MMS               | 5                          | 95.95                         | 2                     |
| WT                   | B19                   | MMS               | 5                          | 92.00                         | 1                     |
| D2312V               | B19                   | MMS               | 10                         | 96.37                         | 1                     |
| D2312V               | B19                   | MMS               | 10                         | 84.61                         | 2                     |
| WT                   | B19                   | MMS               | 10                         | 82.64                         | 1                     |
| D2312V               | B19                   | MMS               | 15                         | 74.83                         | 1                     |
| D2312V               | B19                   | MMS               | 15                         | 65.86                         | 2                     |
| WT                   | B19                   | MMS               | 15                         | 79.85                         | 1                     |
| D2312V               | B19                   | MMS               | 20                         | 43.33                         | 1                     |
| D2312V               | B19                   | MMS               | 20                         | 38.25                         | 2                     |
| WT                   | B19                   | MMS               | 20                         | 54.64                         | 1                     |
| D2312V               | B19                   | MMS               | 30                         | 11.27                         | 1                     |
| D2312V               | B19                   | MMS               | 30                         | 12.87                         | 2                     |
| WT                   | B19                   | MMS               | 30                         | 18.88                         | 1                     |
| D2312V               | B19                   | MMS               | 40                         | 2.76                          | 1                     |
| D2312V               | B19                   | MMS               | 40                         | 4.11                          | 2                     |
| WT                   | B19                   | MMS               | 40                         | 5.10                          | 1                     |
| D2312V               | B19                   | Parp              | 0.01                       | 95.79                         | 1                     |
| D2312V               | B19                   | Parp              | 0.01                       | 93.37                         | 2                     |
| WT                   | B19                   | Parp              | 0.01                       | 90.18                         | 1                     |
| D2312V               | B19                   | Parp              | 0.1                        | 81.51                         | 1                     |
| D2312V               | B19                   | Parp              | 0.1                        | 78.11                         | 2                     |
| WT                   | B19                   | Parp              | 0.1                        | 83.20                         | 1                     |
| D2312V               | B19                   | Parp              | 1                          | 40.31                         | 1                     |
| D2312V               | B19                   | Parp              | 1                          | 45.74                         | 2                     |
| WT                   | B19                   | Parp              | 1                          | 62.12                         | 1                     |
| D2312V               | B19                   | Parp              | 10                         | 3.62                          | 1                     |
| D2312V               | B19                   | Parp              | 10                         | 3.80                          | 2                     |
| WT                   | B19                   | Parp              | 10                         | 6.08                          | 1                     |
| D2312V               | B19                   | IR                | 50                         | 68.32                         | 1                     |
| D2312V               | B19                   | IR                | 50                         | 75.42                         | 2                     |
| WT                   | B19                   | IR                | 50                         | 94.32                         | 1                     |
| D2312V               | B19                   | IR                | 100                        | 49.22                         | 1                     |
| D2312V               | B19                   | IR                | 100                        | 49.52                         | 2                     |
| WT                   | B19                   | IR                | 100                        | 84.33                         | 1                     |

| Variant <sup>a</sup> | Batch ID <sup>b</sup> | Drug <sup>c</sup> | Concentration <sup>d</sup> | Percent Survived <sup>e</sup> | Clone ID <sup>f</sup> |
|----------------------|-----------------------|-------------------|----------------------------|-------------------------------|-----------------------|
| D2312V               | B19                   | IR                | 200                        | 25.32                         | 1                     |
| D2312V               | B19                   | IR                | 200                        | 24.28                         | 2                     |
| WT                   | B19                   | IR                | 200                        | 74.34                         | 1                     |
| D2312V               | B19                   | IR                | 400                        | 13.44                         | 1                     |
| D2312V               | B19                   | IR                | 400                        | 5.85                          | 2                     |
| WT                   | B19                   | IR                | 400                        | 49.53                         | 1                     |
| D2312V               | B19                   | IR                | 600                        | 14.43                         | 1                     |
| D2312V               | B19                   | IR                | 600                        | 4.24                          | 2                     |
| WT                   | B19                   | IR                | 600                        | 39.75                         | 1                     |
| G637G                | B20                   | Camp              | 2.5                        | 96.72                         | 1                     |
| G637G                | B20                   | Camp              | 2.5                        | 98.50                         | 2                     |
| WT                   | B20                   | Camp              | 2.5                        | 94.31                         | 1                     |
| G637G                | B20                   | Camp              | 5                          | 83.76                         | 1                     |
| G637G                | B20                   | Camp              | 5                          | 87.38                         | 2                     |
| WT                   | B20                   | Camp              | 5                          | 87.37                         | 1                     |
| G637G                | B20                   | Camp              | 25                         | 74.89                         | 1                     |
| G637G                | B20                   | Camp              | 25                         | 79.43                         | 2                     |
| WT                   | B20                   | Camp              | 25                         | 80.39                         | 1                     |
| G637G                | B20                   | Camp              | 50                         | 57.09                         | 1                     |
| G637G                | B20                   | Camp              | 50                         | 61.92                         | 2                     |
| WT                   | B20                   | Camp              | 50                         | 58.51                         | 1                     |
| G637G                | B20                   | Camp              | 100                        | 22.44                         | 1                     |
| G637G                | B20                   | Camp              | 100                        | 22.99                         | 2                     |
| WT                   | B20                   | Camp              | 100                        | 20.43                         | 1                     |
| G637G                | B20                   | Camp              | 200                        | 8.52                          | 1                     |
| G637G                | B20                   | Camp              | 200                        | 12.84                         | 2                     |
| WT                   | B20                   | Camp              | 200                        | 7.13                          | 1                     |
| G637G                | B20                   | MMC               | 5                          | 85.86                         | 1                     |
| G637G                | B20                   | MMC               | 5                          | 89.31                         | 2                     |
| WT                   | B20                   | MMC               | 5                          | 93.69                         | 1                     |
| G637G                | B20                   | MMC               | 10                         | 77.01                         | 1                     |
| G637G                | B20                   | MMC               | 10                         | 78.15                         | 2                     |
| WT                   | B20                   | MMC               | 10                         | 81.78                         | 1                     |
| G637G                | B20                   | MMC               | 20                         | 65.52                         | 1                     |
| G637G                | B20                   | MMC               | 20                         | 62.43                         | 2                     |
| WT                   | B20                   | MMC               | 20                         | 67.97                         | 1                     |
| G637G                | B20                   | MMC               | 40                         | 37.96                         | 1                     |
| G637G                | B20                   | MMC               | 40                         | 39.40                         | 2                     |
| WT                   | B20                   | MMC               | 40                         | 42.99                         | 1                     |
| G637G                | B20                   | MMC               | 60                         | 24.33                         | 1                     |

| Variant <sup>a</sup> | Batch ID <sup>b</sup> | Drug <sup>c</sup> | Concentration <sup>d</sup> | Percent Survived <sup>e</sup> | Clone ID <sup>f</sup> |
|----------------------|-----------------------|-------------------|----------------------------|-------------------------------|-----------------------|
| G637G                | B20                   | MMC               | 60                         | 25.64                         | 2                     |
| WT                   | B20                   | MMC               | 60                         | 24.58                         | 1                     |
| G637G                | B20                   | MMC               | 80                         | 16.95                         | 1                     |
| G637G                | B20                   | MMC               | 80                         | 20.25                         | 2                     |
| WT                   | B20                   | MMC               | 80                         | 16.24                         | 1                     |
| G637G                | B20                   | Cisp              | 0.2                        | 64.04                         | 1                     |
| G637G                | B20                   | Cisp              | 0.2                        | 65.93                         | 2                     |
| WT                   | B20                   | Cisp              | 0.2                        | 70.03                         | 1                     |
| G637G                | B20                   | Cisp              | 0.4                        | 42.77                         | 1                     |
| G637G                | B20                   | Cisp              | 0.4                        | 41.77                         | 2                     |
| WT                   | B20                   | Cisp              | 0.4                        | 48.72                         | 1                     |
| G637G                | B20                   | Cisp              | 0.6                        | 26.87                         | 1                     |
| G637G                | B20                   | Cisp              | 0.6                        | 27.21                         | 2                     |
| WT                   | B20                   | Cisp              | 0.6                        | 31.13                         | 1                     |
| G637G                | B20                   | Cisp              | 1                          | 15.85                         | 1                     |
| G637G                | B20                   | Cisp              | 1                          | 16.86                         | 2                     |
| WT                   | B20                   | Cisp              | 1                          | 15.08                         | 1                     |
| G637G                | B20                   | Cisp              | 1.2                        | 12.23                         | 1                     |
| G637G                | B20                   | Cisp              | 1.2                        | 13.06                         | 2                     |
| WT                   | B20                   | Cisp              | 1.2                        | 9.68                          | 1                     |
| G637G                | B20                   | Cisp              | 1.5                        | 10.92                         | 1                     |
| G637G                | B20                   | Cisp              | 1.5                        | 13.86                         | 2                     |
| WT                   | B20                   | Cisp              | 1.5                        | 7.26                          | 1                     |
| G637G                | B20                   | MMS               | 5                          | 97.42                         | 1                     |
| G637G                | B20                   | MMS               | 5                          | 86.00                         | 2                     |
| WT                   | B20                   | MMS               | 5                          | 93.06                         | 1                     |
| G637G                | B20                   | MMS               | 10                         | 80.93                         | 1                     |
| G637G                | B20                   | MMS               | 10                         | 73.26                         | 2                     |
| WT                   | B20                   | MMS               | 10                         | 82.92                         | 1                     |
| G637G                | B20                   | MMS               | 15                         | 70.30                         | 1                     |
| G637G                | B20                   | MMS               | 15                         | 61.36                         | 2                     |
| WT                   | B20                   | MMS               | 15                         | 74.69                         | 1                     |
| G637G                | B20                   | MMS               | 20                         | 40.33                         | 1                     |
| G637G                | B20                   | MMS               | 20                         | 40.09                         | 2                     |
| WT                   | B20                   | MMS               | 20                         | 56.13                         | 1                     |
| G637G                | B20                   | MMS               | 30                         | 11.68                         | 1                     |
| G637G                | B20                   | MMS               | 30                         | 16.37                         | 2                     |
| WT                   | B20                   | MMS               | 30                         | 16.17                         | 1                     |
| G637G                | B20                   | MMS               | 40                         | 4.94                          | 1                     |
| G637G                | B20                   | MMS               | 40                         | 6.39                          | 2                     |

| Variant <sup>a</sup> | Batch ID <sup>b</sup> | Drug <sup>c</sup> | Concentration <sup>d</sup> | Percent Survived <sup>e</sup> | Clone ID <sup>f</sup> |
|----------------------|-----------------------|-------------------|----------------------------|-------------------------------|-----------------------|
| WT                   | B20                   | MMS               | 40                         | 4.59                          | 1                     |
| G637G                | B20                   | Parp              | 0.01                       | 92.39                         | 1                     |
| G637G                | B20                   | Parp              | 0.01                       | 82.45                         | 2                     |
| WT                   | B20                   | Parp              | 0.01                       | 86.37                         | 1                     |
| G637G                | B20                   | Parp              | 0.1                        | 68.35                         | 1                     |
| G637G                | B20                   | Parp              | 0.1                        | 61.08                         | 2                     |
| WT                   | B20                   | Parp              | 0.1                        | 71.32                         | 1                     |
| G637G                | B20                   | Parp              | 1                          | 34.05                         | 1                     |
| G637G                | B20                   | Parp              | 1                          | 31.28                         | 2                     |
| WT                   | B20                   | Parp              | 1                          | 50.27                         | 1                     |
| G637G                | B20                   | Parp              | 10                         | 3.62                          | 1                     |
| G637G                | B20                   | Parp              | 10                         | 4.69                          | 2                     |
| WT                   | B20                   | Parp              | 10                         | 2.08                          | 1                     |
| G637G                | B20                   | IR                | 50                         | 89.30                         | 1                     |
| G637G                | B20                   | IR                | 50                         | 94.35                         | 2                     |
| WT                   | B20                   | IR                | 50                         | 83.44                         | 1                     |
| G637G                | B20                   | IR                | 100                        | 97.06                         | 1                     |
| G637G                | B20                   | IR                | 100                        | 90.99                         | 2                     |
| WT                   | B20                   | IR                | 100                        | 81.37                         | 1                     |
| G637G                | B20                   | IR                | 200                        | 77.66                         | 1                     |
| G637G                | B20                   | IR                | 200                        | 60.76                         | 2                     |
| WT                   | B20                   | IR                | 200                        | 67.93                         | 1                     |
| G637G                | B20                   | IR                | 400                        | 49.15                         | 1                     |
| G637G                | B20                   | IR                | 400                        | 40.51                         | 2                     |
| WT                   | B20                   | IR                | 400                        | 46.92                         | 1                     |
| G637G                | B20                   | IR                | 600                        | 39.09                         | 1                     |
| G637G                | B20                   | IR                | 600                        | 33.49                         | 2                     |
| WT                   | B20                   | IR                | 600                        | 40.18                         | 1                     |
| D2312E               | B21                   | Camp              | 2.5                        | 82.52                         | 1                     |
| D2312E               | B21                   | Camp              | 2.5                        | 92.00                         | 2                     |
| WT                   | B21                   | Camp              | 2.5                        | 82.67                         | 1                     |
| D2312E               | B21                   | Camp              | 5                          | 92.66                         | 1                     |
| D2312E               | B21                   | Camp              | 5                          | 100.00                        | 2                     |
| WT                   | B21                   | Camp              | 5                          | 69.04                         | 1                     |
| D2312E               | B21                   | Camp              | 25                         | 69.02                         | 1                     |
| D2312E               | B21                   | Camp              | 25                         | 70.86                         | 2                     |
| WT                   | B21                   | Camp              | 25                         | 40.88                         | 1                     |
| D2312E               | B21                   | Camp              | 50                         | 36.59                         | 1                     |
| D2312E               | B21                   | Camp              | 50                         | 30.40                         | 2                     |
| WT                   | B21                   | Camp              | 50                         | 15.78                         | 1                     |

| Variant <sup>a</sup> | Batch ID <sup>b</sup> | Drug <sup>c</sup> | Concentration <sup>d</sup> | Percent Survived <sup>e</sup> | Clone ID <sup>f</sup> |
|----------------------|-----------------------|-------------------|----------------------------|-------------------------------|-----------------------|
| D2312E               | B21                   | Camp              | 100                        | 7.52                          | 1                     |
| D2312E               | B21                   | Camp              | 100                        | 4.32                          | 2                     |
| WT                   | B21                   | Camp              | 100                        | 4.24                          | 1                     |
| D2312E               | B21                   | Camp              | 200                        | 2.54                          | 1                     |
| D2312E               | B21                   | Camp              | 200                        | 2.43                          | 2                     |
| WT                   | B21                   | Camp              | 200                        | 4.54                          | 1                     |
| D2312E               | B21                   | MMC               | 5                          | 77.87                         | 1                     |
| D2312E               | B21                   | MMC               | 5                          | 72.49                         | 2                     |
| WT                   | B21                   | MMC               | 5                          | 80.79                         | 1                     |
| D2312E               | B21                   | MMC               | 10                         | 75.46                         | 1                     |
| D2312E               | B21                   | MMC               | 10                         | 65.57                         | 2                     |
| WT                   | B21                   | MMC               | 10                         | 79.71                         | 1                     |
| D2312E               | B21                   | MMC               | 20                         | 57.87                         | 1                     |
| D2312E               | B21                   | MMC               | 20                         | 60.05                         | 2                     |
| WT                   | B21                   | MMC               | 20                         | 83.47                         | 1                     |
| D2312E               | B21                   | MMC               | 40                         | 33.43                         | 1                     |
| D2312E               | B21                   | MMC               | 40                         | 28.38                         | 2                     |
| WT                   | B21                   | MMC               | 40                         | 49.97                         | 1                     |
| D2312E               | B21                   | MMC               | 60                         | 11.21                         | 1                     |
| D2312E               | B21                   | MMC               | 60                         | 10.49                         | 2                     |
| WT                   | B21                   | MMC               | 60                         | 31.01                         | 1                     |
| D2312E               | B21                   | MMC               | 80                         | 5.12                          | 1                     |
| D2312E               | B21                   | MMC               | 80                         | 5.38                          | 2                     |
| WT                   | B21                   | MMC               | 80                         | 18.06                         | 1                     |
| D2312E               | B21                   | Cisp              | 0.2                        | 66.03                         | 1                     |
| D2312E               | B21                   | Cisp              | 0.2                        | 69.08                         | 2                     |
| WT                   | B21                   | Cisp              | 0.2                        | 74.12                         | 1                     |
| D2312E               | B21                   | Cisp              | 0.4                        | 37.93                         | 1                     |
| D2312E               | B21                   | Cisp              | 0.4                        | 38.56                         | 2                     |
| WT                   | B21                   | Cisp              | 0.4                        | 52.11                         | 1                     |
| D2312E               | B21                   | Cisp              | 0.6                        | 24.20                         | 1                     |
| D2312E               | B21                   | Cisp              | 0.6                        | 32.73                         | 2                     |
| WT                   | B21                   | Cisp              | 0.6                        | 27.89                         | 1                     |
| D2312E               | B21                   | Cisp              | 1                          | 6.65                          | 1                     |
| D2312E               | B21                   | Cisp              | 1                          | 7.71                          | 2                     |
| WT                   | B21                   | Cisp              | 1                          | 7.77                          | 1                     |
| D2312E               | B21                   | Cisp              | 1.2                        | 4.03                          | 1                     |
| D2312E               | B21                   | Cisp              | 1.2                        | 4.76                          | 2                     |
| WT                   | B21                   | Cisp              | 1.2                        | 5.64                          | 1                     |
| D2312E               | B21                   | Cisp              | 1.5                        | 4.25                          | 1                     |

| Variant <sup>a</sup> | Batch ID <sup>b</sup> | Drug <sup>c</sup> | Concentration <sup>d</sup> | Percent Survived <sup>e</sup> | Clone ID <sup>f</sup> |
|----------------------|-----------------------|-------------------|----------------------------|-------------------------------|-----------------------|
| D2312E               | B21                   | Cisp              | 1.5                        | 1.61                          | 2                     |
| WT                   | B21                   | Cisp              | 1.5                        | 6.59                          | 1                     |
| D2312E               | B21                   | MMS               | 5                          | 93.77                         | 1                     |
| D2312E               | B21                   | MMS               | 5                          | 100.00                        | 2                     |
| WT                   | B21                   | MMS               | 5                          | 86.35                         | 1                     |
| D2312E               | B21                   | MMS               | 10                         | 83.84                         | 1                     |
| D2312E               | B21                   | MMS               | 10                         | 100.00                        | 2                     |
| WT                   | B21                   | MMS               | 10                         | 65.04                         | 1                     |
| D2312E               | B21                   | MMS               | 15                         | 59.59                         | 1                     |
| D2312E               | B21                   | MMS               | 15                         | 83.89                         | 2                     |
| WT                   | B21                   | MMS               | 15                         | 38.02                         | 1                     |
| D2312E               | B21                   | MMS               | 20                         | 36.81                         | 1                     |
| D2312E               | B21                   | MMS               | 20                         | 65.95                         | 2                     |
| WT                   | B21                   | MMS               | 20                         | 20.03                         | 1                     |
| D2312E               | B21                   | MMS               | 30                         | 4.97                          | 1                     |
| D2312E               | B21                   | MMS               | 30                         | 6.98                          | 2                     |
| WT                   | B21                   | MMS               | 30                         | 7.33                          | 1                     |
| D2312E               | B21                   | MMS               | 40                         | 2.04                          | 1                     |
| D2312E               | B21                   | MMS               | 40                         | 1.83                          | 2                     |
| WT                   | B21                   | MMS               | 40                         | 5.23                          | 1                     |
| D2312E               | B21                   | Parp              | 0.01                       | 71.28                         | 1                     |
| D2312E               | B21                   | Parp              | 0.01                       | 78.33                         | 2                     |
| WT                   | B21                   | Parp              | 0.01                       | 73.84                         | 1                     |
| D2312E               | B21                   | Parp              | 0.1                        | 67.96                         | 1                     |
| D2312E               | B21                   | Parp              | 0.1                        | 61.27                         | 2                     |
| WT                   | B21                   | Parp              | 0.1                        | 72.77                         | 1                     |
| D2312E               | B21                   | Parp              | 1                          | 30.14                         | 1                     |
| D2312E               | B21                   | Parp              | 1                          | 37.79                         | 2                     |
| WT                   | B21                   | Parp              | 1                          | 40.38                         | 1                     |
| D2312E               | B21                   | Parp              | 10                         | 1.00                          | 1                     |
| D2312E               | B21                   | Parp              | 10                         | 1.00                          | 2                     |
| WT                   | B21                   | Parp              | 10                         | 2.58                          | 1                     |
| D2312E               | B21                   | IR                | 50                         | 100.00                        | 1                     |
| D2312E               | B21                   | IR                | 50                         | 100.00                        | 2                     |
| WT                   | B21                   | IR                | 50                         | 100.00                        | 1                     |
| D2312E               | B21                   | IR                | 100                        | 100.00                        | 1                     |
| D2312E               | B21                   | IR                | 100                        | 87.04                         | 2                     |
| WT                   | B21                   | IR                | 100                        | 87.64                         | 1                     |
| D2312E               | B21                   | IR                | 200                        | 78.34                         | 1                     |
| D2312E               | B21                   | IR                | 200                        | 69.68                         | 2                     |

| Variant <sup>a</sup> | Batch ID <sup>b</sup> | Drug <sup>c</sup> | Concentration <sup>d</sup> | Percent Survived <sup>e</sup> | Clone ID <sup>f</sup> |
|----------------------|-----------------------|-------------------|----------------------------|-------------------------------|-----------------------|
| WT                   | B21                   | IR                | 200                        | 94.93                         | 1                     |
| D2312E               | B21                   | IR                | 400                        | 46.63                         | 1                     |
| D2312E               | B21                   | IR                | 400                        | 48.26                         | 2                     |
| WT                   | B21                   | IR                | 400                        | 47.70                         | 1                     |
| D2312E               | B21                   | IR                | 600                        | 28.68                         | 1                     |
| D2312E               | B21                   | IR                | 600                        | 27.33                         | 2                     |
| WT                   | B21                   | IR                | 600                        | 32.09                         | 1                     |
| T2708N*              | B22                   | Camp              | 2.5                        | 75.99                         | 1                     |
| T2708N*              | B22                   | Camp              | 2.5                        | 100.00                        | 2                     |
| WT                   | B22                   | Camp              | 2.5                        | 90.67                         | 1                     |
| T2708N*              | B22                   | Camp              | 5                          | 57.57                         | 1                     |
| T2708N*              | B22                   | Camp              | 5                          | 86.75                         | 2                     |
| WT                   | B22                   | Camp              | 5                          | 87.86                         | 1                     |
| T2708N*              | B22                   | Camp              | 25                         | 14.32                         | 1                     |
| T2708N*              | B22                   | Camp              | 25                         | 23.05                         | 2                     |
| WT                   | B22                   | Camp              | 25                         | 67.12                         | 1                     |
| T2708N*              | B22                   | Camp              | 50                         | 15.96                         | 1                     |
| T2708N*              | B22                   | Camp              | 50                         | 3.79                          | 2                     |
| WT                   | B22                   | Camp              | 50                         | 50.72                         | 1                     |
| T2708N*              | B22                   | Camp              | 100                        | 15.01                         | 1                     |
| T2708N*              | B22                   | Camp              | 100                        | 1.78                          | 2                     |
| WT                   | B22                   | Camp              | 100                        | 8.65                          | 1                     |
| T2708N*              | B22                   | Camp              | 200                        | 16.64                         | 1                     |
| T2708N*              | B22                   | Camp              | 200                        | 2.45                          | 2                     |
| WT                   | B22                   | Camp              | 200                        | 4.98                          | 1                     |
| T2708N*              | B22                   | MMC               | 5                          | 30.42                         | 1                     |
| T2708N*              | B22                   | MMC               | 5                          | 62.36                         | 2                     |
| WT                   | B22                   | MMC               | 5                          | 94.39                         | 1                     |
| T2708N*              | B22                   | MMC               | 10                         | 17.58                         | 1                     |
| T2708N*              | B22                   | MMC               | 10                         | 26.09                         | 2                     |
| WT                   | B22                   | MMC               | 10                         | 78.61                         | 1                     |
| T2708N*              | B22                   | MMC               | 20                         | 14.21                         | 1                     |
| T2708N*              | B22                   | MMC               | 20                         | 9.89                          | 2                     |
| WT                   | B22                   | MMC               | 20                         | 70.14                         | 1                     |
| T2708N*              | B22                   | MMC               | 40                         | 10.02                         | 1                     |
| T2708N*              | B22                   | MMC               | 40                         | 3.33                          | 2                     |
| WT                   | B22                   | MMC               | 40                         | 44.23                         | 1                     |
| T2708N*              | B22                   | MMC               | 60                         | 14.21                         | 1                     |
| T2708N*              | B22                   | MMC               | 60                         | 2.15                          | 2                     |
| WT                   | B22                   | MMC               | 60                         | 20.47                         | 1                     |

| Variant <sup>a</sup> | Batch ID <sup>b</sup> | Drug <sup>c</sup> | Concentration <sup>d</sup> | Percent Survived <sup>e</sup> | Clone ID <sup>f</sup> |
|----------------------|-----------------------|-------------------|----------------------------|-------------------------------|-----------------------|
| T2708N*              | B22                   | MMC               | 80                         | 13.57                         | 1                     |
| T2708N*              | B22                   | MMC               | 80                         | 3.28                          | 2                     |
| WT                   | B22                   | MMC               | 80                         | 11.18                         | 1                     |
| T2708N*              | B22                   | Cisp              | 0.2                        | 15.49                         | 1                     |
| T2708N*              | B22                   | Cisp              | 0.2                        | 14.99                         | 2                     |
| WT                   | B22                   | Cisp              | 0.2                        | 71.23                         | 1                     |
| T2708N*              | B22                   | Cisp              | 0.4                        | 13.71                         | 1                     |
| T2708N*              | B22                   | Cisp              | 0.4                        | 4.67                          | 2                     |
| WT                   | B22                   | Cisp              | 0.4                        | 37.93                         | 1                     |
| T2708N*              | B22                   | Cisp              | 0.6                        | 12.51                         | 1                     |
| T2708N*              | B22                   | Cisp              | 0.6                        | 2.92                          | 2                     |
| WT                   | B22                   | Cisp              | 0.6                        | 20.34                         | 1                     |
| T2708N*              | B22                   | Cisp              | 1                          | 12.99                         | 1                     |
| T2708N*              | B22                   | Cisp              | 1                          | 2.34                          | 2                     |
| WT                   | B22                   | Cisp              | 1                          | 7.28                          | 1                     |
| T2708N*              | B22                   | Cisp              | 1.2                        | 10.73                         | 1                     |
| T2708N*              | B22                   | Cisp              | 1.2                        | 3.02                          | 2                     |
| WT                   | B22                   | Cisp              | 1.2                        | 5.98                          | 1                     |
| T2708N*              | B22                   | Cisp              | 1.5                        | 17.64                         | 1                     |
| T2708N*              | B22                   | Cisp              | 1.5                        | 3.55                          | 2                     |
| WT                   | B22                   | Cisp              | 1.5                        | 5.83                          | 1                     |
| T2708N*              | B22                   | MMS               | 5                          | 26.09                         | 1                     |
| T2708N*              | B22                   | MMS               | 5                          | 65.67                         | 2                     |
| WT                   | B22                   | MMS               | 5                          | 95.29                         | 1                     |
| T2708N*              | B22                   | MMS               | 10                         | 13.13                         | 1                     |
| T2708N*              | B22                   | MMS               | 10                         | 30.32                         | 2                     |
| WT                   | B22                   | MMS               | 10                         | 86.79                         | 1                     |
| T2708N*              | B22                   | MMS               | 15                         | 11.50                         | 1                     |
| T2708N*              | B22                   | MMS               | 15                         | 13.62                         | 2                     |
| WT                   | B22                   | MMS               | 15                         | 75.46                         | 1                     |
| T2708N*              | B22                   | MMS               | 20                         | 8.84                          | 1                     |
| T2708N*              | B22                   | MMS               | 20                         | 3.44                          | 2                     |
| WT                   | B22                   | MMS               | 20                         | 55.10                         | 1                     |
| T2708N*              | B22                   | MMS               | 30                         | 8.24                          | 1                     |
| T2708N*              | B22                   | MMS               | 30                         | 2.29                          | 2                     |
| WT                   | B22                   | MMS               | 30                         | 16.86                         | 1                     |
| T2708N*              | B22                   | MMS               | 40                         | 7.64                          | 1                     |
| T2708N*              | B22                   | MMS               | 40                         | 1.32                          | 2                     |
| WT                   | B22                   | MMS               | 40                         | 3.74                          | 1                     |
| T2708N*              | B22                   | Parp              | 0.01                       | 16.21                         | 1                     |



| Variant <sup>a</sup> | Batch ID <sup>b</sup> | Drug <sup>c</sup> | Concentration <sup>d</sup> | Percent Survived <sup>e</sup> | Clone ID <sup>f</sup> |
|----------------------|-----------------------|-------------------|----------------------------|-------------------------------|-----------------------|
| T2708N*              | B22                   | Parp              | 0.01                       | 52.29                         | 2                     |
| WT                   | B22                   | Parp              | 0.01                       | 86.56                         | 1                     |
| T2708N*              | B22                   | Parp              | 0.1                        | 14.32                         | 1                     |
| T2708N*              | B22                   | Parp              | 0.1                        | 14.76                         | 2                     |
| WT                   | B22                   | Parp              | 0.1                        | 77.74                         | 1                     |
| T2708N*              | B22                   | Parp              | 1                          | 12.26                         | 1                     |
| T2708N*              | B22                   | Parp              | 1                          | 5.02                          | 2                     |
| WT                   | B22                   | Parp              | 1                          | 52.91                         | 1                     |
| T2708N*              | B22                   | Parp              | 10                         | 10.95                         | 1                     |
| T2708N*              | B22                   | Parp              | 10                         | 2.94                          | 2                     |
| WT                   | B22                   | Parp              | 10                         | 4.82                          | 1                     |
| T2708N*              | B22                   | IR                | 50                         | 68.32                         | 1                     |
| T2708N*              | B22                   | IR                | 50                         | 75.42                         | 2                     |
| WT                   | B22                   | IR                | 50                         | 94.32                         | 1                     |
| T2708N*              | B22                   | IR                | 200                        | 25.32                         | 1                     |
| T2708N*              | B22                   | IR                | 200                        | 24.28                         | 2                     |
| WT                   | B22                   | IR                | 200                        | 74.34                         | 1                     |
| T2708N*              | B22                   | IR                | 400                        | 13.44                         | 1                     |
| T2708N*              | B22                   | IR                | 400                        | 5.85                          | 2                     |
| WT                   | B22                   | IR                | 400                        | 49.53                         | 1                     |
| T2708N*              | B22                   | IR                | 600                        | 14.43                         | 1                     |
| T2708N*              | B22                   | IR                | 600                        | 4.24                          | 2                     |
| WT                   | B22                   | IR                | 600                        | 39.75                         | 1                     |
| G2281V               | B23                   | Camp              | 2.5                        | 93.34                         | 1                     |
| G2281V               | B23                   | Camp              | 2.5                        | 100.00                        | 2                     |
| WT                   | B23                   | Camp              | 2.5                        | 90.67                         | 1                     |
| G2281V               | B23                   | Camp              | 5                          | 78.13                         | 1                     |
| G2281V               | B23                   | Camp              | 5                          | 100.00                        | 2                     |
| WT                   | B23                   | Camp              | 5                          | 87.86                         | 1                     |
| G2281V               | B23                   | Camp              | 25                         | 83.78                         | 1                     |
| G2281V               | B23                   | Camp              | 25                         | 75.29                         | 2                     |
| WT                   | B23                   | Camp              | 25                         | 67.12                         | 1                     |
| G2281V               | B23                   | Camp              | 50                         | 34.02                         | 1                     |
| G2281V               | B23                   | Camp              | 50                         | 39.17                         | 2                     |
| WT                   | B23                   | Camp              | 50                         | 50.72                         | 1                     |
| G2281V               | B23                   | Camp              | 100                        | 4.86                          | 1                     |
| G2281V               | B23                   | Camp              | 100                        | 4.33                          | 2                     |
| WT                   | B23                   | Camp              | 100                        | 8.65                          | 1                     |
| G2281V               | B23                   | Camp              | 200                        | 2.69                          | 1                     |
| G2281V               | B23                   | Camp              | 200                        | 2.63                          | 2                     |

| Variant <sup>a</sup> | Batch ID <sup>b</sup> | Drug <sup>c</sup> | Concentration <sup>d</sup> | Percent Survived <sup>e</sup> | Clone ID <sup>f</sup> |
|----------------------|-----------------------|-------------------|----------------------------|-------------------------------|-----------------------|
| WT                   | B23                   | Camp              | 200                        | 4.98                          | 1                     |
| G2281V               | B23                   | MMC               | 5                          | 96.93                         | 1                     |
| G2281V               | B23                   | MMC               | 5                          | 87.64                         | 2                     |
| WT                   | B23                   | MMC               | 5                          | 94.39                         | 1                     |
| G2281V               | B23                   | MMC               | 10                         | 69.12                         | 1                     |
| G2281V               | B23                   | MMC               | 10                         | 78.58                         | 2                     |
| WT                   | B23                   | MMC               | 10                         | 78.61                         | 1                     |
| G2281V               | B23                   | MMC               | 20                         | 61.19                         | 1                     |
| G2281V               | B23                   | MMC               | 20                         | 55.51                         | 2                     |
| WT                   | B23                   | MMC               | 20                         | 70.14                         | 1                     |
| G2281V               | B23                   | MMC               | 40                         | 27.48                         | 1                     |
| G2281V               | B23                   | MMC               | 40                         | 28.40                         | 2                     |
| WT                   | B23                   | MMC               | 40                         | 44.23                         | 1                     |
| G2281V               | B23                   | MMC               | 60                         | 10.58                         | 1                     |
| G2281V               | B23                   | MMC               | 60                         | 11.29                         | 2                     |
| WT                   | B23                   | MMC               | 60                         | 20.47                         | 1                     |
| G2281V               | B23                   | MMC               | 80                         | 5.52                          | 1                     |
| G2281V               | B23                   | MMC               | 80                         | 5.91                          | 2                     |
| WT                   | B23                   | MMC               | 80                         | 11.18                         | 1                     |
| G2281V               | B23                   | Cisp              | 0.2                        | 56.38                         | 1                     |
| G2281V               | B23                   | Cisp              | 0.2                        | 56.24                         | 2                     |
| WT                   | B23                   | Cisp              | 0.2                        | 71.23                         | 1                     |
| G2281V               | B23                   | Cisp              | 0.4                        | 20.04                         | 1                     |
| G2281V               | B23                   | Cisp              | 0.4                        | 23.57                         | 2                     |
| WT                   | B23                   | Cisp              | 0.4                        | 37.93                         | 1                     |
| G2281V               | B23                   | Cisp              | 0.6                        | 9.20                          | 1                     |
| G2281V               | B23                   | Cisp              | 0.6                        | 11.27                         | 2                     |
| WT                   | B23                   | Cisp              | 0.6                        | 20.34                         | 1                     |
| G2281V               | B23                   | Cisp              | 1                          | 3.55                          | 1                     |
| G2281V               | B23                   | Cisp              | 1                          | 8.18                          | 2                     |
| WT                   | B23                   | Cisp              | 1                          | 7.28                          | 1                     |
| G2281V               | B23                   | Cisp              | 1.2                        | 4.03                          | 1                     |
| G2281V               | B23                   | Cisp              | 1.2                        | 5.61                          | 2                     |
| WT                   | B23                   | Cisp              | 1.2                        | 5.98                          | 1                     |
| G2281V               | B23                   | Cisp              | 1.5                        | 3.26                          | 1                     |
| G2281V               | B23                   | Cisp              | 1.5                        | 6.06                          | 2                     |
| WT                   | B23                   | Cisp              | 1.5                        | 5.83                          | 1                     |
| G2281V               | B23                   | MMS               | 5                          | 100.00                        | 1                     |
| G2281V               | B23                   | MMS               | 5                          | 94.32                         | 2                     |
| WT                   | B23                   | MMS               | 5                          | 95.29                         | 1                     |

| Variant <sup>a</sup> | Batch ID <sup>b</sup> | Drug <sup>c</sup> | Concentration <sup>d</sup> | Percent Survived <sup>e</sup> | Clone ID <sup>f</sup> |
|----------------------|-----------------------|-------------------|----------------------------|-------------------------------|-----------------------|
| G2281V               | B23                   | MMS               | 10                         | 80.76                         | 1                     |
| G2281V               | B23                   | MMS               | 10                         | 83.29                         | 2                     |
| WT                   | B23                   | MMS               | 10                         | 86.79                         | 1                     |
| G2281V               | B23                   | MMS               | 15                         | 51.20                         | 1                     |
| G2281V               | B23                   | MMS               | 15                         | 61.17                         | 2                     |
| WT                   | B23                   | MMS               | 15                         | 75.46                         | 1                     |
| G2281V               | B23                   | MMS               | 20                         | 18.75                         | 1                     |
| G2281V               | B23                   | MMS               | 20                         | 24.34                         | 2                     |
| WT                   | B23                   | MMS               | 20                         | 55.10                         | 1                     |
| G2281V               | B23                   | MMS               | 30                         | 3.77                          | 1                     |
| G2281V               | B23                   | MMS               | 30                         | 5.19                          | 2                     |
| WT                   | B23                   | MMS               | 30                         | 16.86                         | 1                     |
| G2281V               | B23                   | MMS               | 40                         | 1.73                          | 1                     |
| G2281V               | B23                   | MMS               | 40                         | 2.60                          | 2                     |
| WT                   | B23                   | MMS               | 40                         | 3.74                          | 1                     |
| G2281V               | B23                   | Parp              | 0.01                       | 100.00                        | 1                     |
| G2281V               | B23                   | Parp              | 0.01                       | 89.09                         | 2                     |
| WT                   | B23                   | Parp              | 0.01                       | 86.56                         | 1                     |
| G2281V               | B23                   | Parp              | 0.1                        | 70.89                         | 1                     |
| G2281V               | B23                   | Parp              | 0.1                        | 79.94                         | 2                     |
| WT                   | B23                   | Parp              | 0.1                        | 77.74                         | 1                     |
| G2281V               | B23                   | Parp              | 1                          | 39.28                         | 1                     |
| G2281V               | B23                   | Parp              | 1                          | 35.43                         | 2                     |
| WT                   | B23                   | Parp              | 1                          | 52.91                         | 1                     |
| G2281V               | B23                   | Parp              | 10                         | 2.82                          | 1                     |
| G2281V               | B23                   | Parp              | 10                         | 3.25                          | 2                     |
| WT                   | B23                   | Parp              | 10                         | 4.82                          | 1                     |
| G2281V               | B23                   | IR                | 50                         | 84.32                         | 1                     |
| G2281V               | B23                   | IR                | 50                         | 84.28                         | 2                     |
| WT                   | B23                   | IR                | 50                         | 94.32                         | 1                     |
| G2281V               | B23                   | IR                | 200                        | 54.35                         | 1                     |
| G2281V               | B23                   | IR                | 200                        | 65.34                         | 2                     |
| WT                   | B23                   | IR                | 200                        | 74.34                         | 1                     |
| G2281V               | B23                   | IR                | 400                        | 23.53                         | 1                     |
| G2281V               | B23                   | IR                | 400                        | 37.35                         | 2                     |
| WT                   | B23                   | IR                | 400                        | 49.53                         | 1                     |
| G2281V               | B23                   | IR                | 600                        | 17.57                         | 1                     |
| G2281V               | B23                   | IR                | 600                        | 26.01                         | 2                     |
| WT                   | B23                   | IR                | 600                        | 39.75                         | 1                     |
| N2622S               | B24                   | Camp              | 2.5                        | 100.00                        | 1                     |

| Variant <sup>a</sup> | Batch ID <sup>b</sup> | Drug <sup>c</sup> | Concentration <sup>d</sup> | Percent Survived <sup>e</sup> | Clone ID <sup>f</sup> |
|----------------------|-----------------------|-------------------|----------------------------|-------------------------------|-----------------------|
| N2622S               | B24                   | Camp              | 2.5                        | 93.72                         | 2                     |
| WT                   | B24                   | Camp              | 2.5                        | 90.67                         | 1                     |
| N2622S               | B24                   | Camp              | 5                          | 87.94                         | 1                     |
| N2622S               | B24                   | Camp              | 5                          | 100.00                        | 2                     |
| WT                   | B24                   | Camp              | 5                          | 87.86                         | 1                     |
| N2622S               | B24                   | Camp              | 25                         | 42.78                         | 1                     |
| N2622S               | B24                   | Camp              | 25                         | 51.65                         | 2                     |
| WT                   | B24                   | Camp              | 25                         | 67.12                         | 1                     |
| N2622S               | B24                   | Camp              | 50                         | 6.26                          | 1                     |
| N2622S               | B24                   | Camp              | 50                         | 10.65                         | 2                     |
| WT                   | B24                   | Camp              | 50                         | 50.72                         | 1                     |
| N2622S               | B24                   | Camp              | 100                        | 1.00                          | 1                     |
| N2622S               | B24                   | Camp              | 100                        | 2.51                          | 2                     |
| WT                   | B24                   | Camp              | 100                        | 8.65                          | 1                     |
| N2622S               | B24                   | Camp              | 200                        | 1.39                          | 1                     |
| N2622S               | B24                   | Camp              | 200                        | 4.56                          | 2                     |
| WT                   | B24                   | Camp              | 200                        | 4.98                          | 1                     |
| N2622S               | B24                   | MMC               | 5                          | 81.15                         | 1                     |
| N2622S               | B24                   | MMC               | 5                          | 83.05                         | 2                     |
| WT                   | B24                   | MMC               | 5                          | 94.39                         | 1                     |
| N2622S               | B24                   | MMC               | 10                         | 62.03                         | 1                     |
| N2622S               | B24                   | MMC               | 10                         | 67.97                         | 2                     |
| WT                   | B24                   | MMC               | 10                         | 78.61                         | 1                     |
| N2622S               | B24                   | MMC               | 20                         | 28.41                         | 1                     |
| N2622S               | B24                   | MMC               | 20                         | 40.05                         | 2                     |
| WT                   | B24                   | MMC               | 20                         | 70.14                         | 1                     |
| N2622S               | B24                   | MMC               | 40                         | 7.58                          | 1                     |
| N2622S               | B24                   | MMC               | 40                         | 11.66                         | 2                     |
| WT                   | B24                   | MMC               | 40                         | 44.23                         | 1                     |
| N2622S               | B24                   | MMC               | 60                         | 3.96                          | 1                     |
| N2622S               | B24                   | MMC               | 60                         | 5.52                          | 2                     |
| WT                   | B24                   | MMC               | 60                         | 20.47                         | 1                     |
| N2622S               | B24                   | MMC               | 80                         | 3.52                          | 1                     |
| N2622S               | B24                   | MMC               | 80                         | 4.32                          | 2                     |
| WT                   | B24                   | MMC               | 80                         | 11.18                         | 1                     |
| N2622S               | B24                   | Cisp              | 0.2                        | 45.15                         | 1                     |
| N2622S               | B24                   | Cisp              | 0.2                        | 37.43                         | 2                     |
| WT                   | B24                   | Cisp              | 0.2                        | 71.23                         | 1                     |
| N2622S               | B24                   | Cisp              | 0.4                        | 10.05                         | 1                     |
| N2622S               | B24                   | Cisp              | 0.4                        | 12.04                         | 2                     |

| Variant <sup>a</sup> | Batch ID <sup>b</sup> | Drug <sup>c</sup> | Concentration <sup>d</sup> | Percent Survived <sup>e</sup> | Clone ID <sup>f</sup> |
|----------------------|-----------------------|-------------------|----------------------------|-------------------------------|-----------------------|
| WT                   | B24                   | Cisp              | 0.4                        | 37.93                         | 1                     |
| N2622S               | B24                   | Cisp              | 0.6                        | 2.22                          | 1                     |
| N2622S               | B24                   | Cisp              | 0.6                        | 6.42                          | 2                     |
| WT                   | B24                   | Cisp              | 0.6                        | 20.34                         | 1                     |
| N2622S               | B24                   | Cisp              | 1                          | 1.00                          | 1                     |
| N2622S               | B24                   | Cisp              | 1                          | 2.78                          | 2                     |
| WT                   | B24                   | Cisp              | 1                          | 7.28                          | 1                     |
| N2622S               | B24                   | Cisp              | 1.2                        | 1.00                          | 1                     |
| N2622S               | B24                   | Cisp              | 1.2                        | 3.17                          | 2                     |
| WT                   | B24                   | Cisp              | 1.2                        | 5.98                          | 1                     |
| N2622S               | B24                   | Cisp              | 1.5                        | 1.99                          | 1                     |
| N2622S               | B24                   | Cisp              | 1.5                        | 3.04                          | 2                     |
| WT                   | B24                   | Cisp              | 1.5                        | 5.83                          | 1                     |
| N2622S               | B24                   | MMS               | 5                          | 77.25                         | 1                     |
| N2622S               | B24                   | MMS               | 5                          | 89.64                         | 2                     |
| WT                   | B24                   | MMS               | 5                          | 95.29                         | 1                     |
| N2622S               | B24                   | MMS               | 10                         | 48.74                         | 1                     |
| N2622S               | B24                   | MMS               | 10                         | 60.53                         | 2                     |
| WT                   | B24                   | MMS               | 10                         | 86.79                         | 1                     |
| N2622S               | B24                   | MMS               | 15                         | 15.55                         | 1                     |
| N2622S               | B24                   | MMS               | 15                         | 36.66                         | 2                     |
| WT                   | B24                   | MMS               | 15                         | 75.46                         | 1                     |
| N2622S               | B24                   | MMS               | 20                         | 3.41                          | 1                     |
| N2622S               | B24                   | MMS               | 20                         | 13.96                         | 2                     |
| WT                   | B24                   | MMS               | 20                         | 55.10                         | 1                     |
| N2622S               | B24                   | MMS               | 30                         | 1.00                          | 1                     |
| N2622S               | B24                   | MMS               | 30                         | 3.49                          | 2                     |
| WT                   | B24                   | MMS               | 30                         | 16.86                         | 1                     |
| N2622S               | B24                   | MMS               | 40                         | 1.00                          | 1                     |
| N2622S               | B24                   | MMS               | 40                         | 1.80                          | 2                     |
| WT                   | B24                   | MMS               | 40                         | 3.74                          | 1                     |
| N2622S               | B24                   | Parp              | 0.01                       | 74.35                         | 1                     |
| N2622S               | B24                   | Parp              | 0.01                       | 85.79                         | 2                     |
| WT                   | B24                   | Parp              | 0.01                       | 86.56                         | 1                     |
| N2622S               | B24                   | Parp              | 0.1                        | 31.32                         | 1                     |
| N2622S               | B24                   | Parp              | 0.1                        | 39.71                         | 2                     |
| WT                   | B24                   | Parp              | 0.1                        | 77.74                         | 1                     |
| N2622S               | B24                   | Parp              | 1                          | 4.92                          | 1                     |
| N2622S               | B24                   | Parp              | 1                          | 8.80                          | 2                     |
| WT                   | B24                   | Parp              | 1                          | 52.91                         | 1                     |

| Variant <sup>a</sup> | Batch ID <sup>b</sup> | Drug <sup>c</sup> | Concentration <sup>d</sup> | Percent Survived <sup>e</sup> | Clone ID <sup>f</sup> |
|----------------------|-----------------------|-------------------|----------------------------|-------------------------------|-----------------------|
| N2622S               | B24                   | Parp              | 10                         | 2.46                          | 1                     |
| N2622S               | B24                   | Parp              | 10                         | 2.79                          | 2                     |
| WT                   | B24                   | Parp              | 10                         | 4.82                          | 1                     |
| N2622S               | B24                   | IR                | 50                         | 81.13                         | 1                     |
| N2622S               | B24                   | IR                | 50                         | 90.32                         | 2                     |
| WT                   | B24                   | IR                | 50                         | 94.32                         | 1                     |
| N2622S               | B24                   | IR                | 200                        | 55.52                         | 1                     |
| N2622S               | B24                   | IR                | 200                        | 59.68                         | 2                     |
| WT                   | B24                   | IR                | 200                        | 74.34                         | 1                     |
| N2622S               | B24                   | IR                | 400                        | 29.61                         | 1                     |
| N2622S               | B24                   | IR                | 400                        | 30.38                         | 2                     |
| WT                   | B24                   | IR                | 400                        | 49.53                         | 1                     |
| N2622S               | B24                   | IR                | 600                        | 14.38                         | 1                     |
| N2622S               | B24                   | IR                | 600                        | 26.08                         | 2                     |
| WT                   | B24                   | IR                | 600                        | 39.75                         | 1                     |
| K16R                 | B25                   | Camp              | 2.5                        | 86.53                         | 1                     |
| K16R                 | B25                   | Camp              | 2.5                        | 100.00                        | 2                     |
| WT                   | B25                   | Camp              | 2.5                        | 71.59                         | 1                     |
| K16R                 | B25                   | Camp              | 5                          | 92.32                         | 1                     |
| K16R                 | B25                   | Camp              | 5                          | 100.00                        | 2                     |
| WT                   | B25                   | Camp              | 5                          | 79.19                         | 1                     |
| K16R                 | B25                   | Camp              | 25                         | 83.87                         | 1                     |
| K16R                 | B25                   | Camp              | 25                         | 95.23                         | 2                     |
| WT                   | B25                   | Camp              | 25                         | 71.83                         | 1                     |
| K16R                 | B25                   | Camp              | 50                         | 64.09                         | 1                     |
| K16R                 | B25                   | Camp              | 50                         | 69.35                         | 2                     |
| WT                   | B25                   | Camp              | 50                         | 56.46                         | 1                     |
| K16R                 | B25                   | Camp              | 100                        | 15.48                         | 1                     |
| K16R                 | B25                   | Camp              | 100                        | 13.71                         | 2                     |
| WT                   | B25                   | Camp              | 100                        | 21.17                         | 1                     |
| K16R                 | B25                   | Camp              | 200                        | 4.73                          | 1                     |
| K16R                 | B25                   | Camp              | 200                        | 6.96                          | 2                     |
| WT                   | B25                   | Camp              | 200                        | 8.61                          | 1                     |
| K16R                 | B25                   | MMC               | 5                          | 82.98                         | 1                     |
| K16R                 | B25                   | MMC               | 5                          | 90.89                         | 2                     |
| WT                   | B25                   | MMC               | 5                          | 87.15                         | 1                     |
| K16R                 | B25                   | MMC               | 10                         | 84.71                         | 1                     |
| K16R                 | B25                   | MMC               | 10                         | 100.00                        | 2                     |
| WT                   | B25                   | MMC               | 10                         | 88.19                         | 1                     |
| K16R                 | B25                   | MMC               | 20                         | 79.84                         | 1                     |

| Variant <sup>a</sup> | Batch ID <sup>b</sup> | Drug <sup>c</sup> | Concentration <sup>d</sup> | Percent Survived <sup>e</sup> | Clone ID <sup>f</sup> |
|----------------------|-----------------------|-------------------|----------------------------|-------------------------------|-----------------------|
| K16R                 | B25                   | MMC               | 20                         | 84.86                         | 2                     |
| WT                   | B25                   | MMC               | 20                         | 94.35                         | 1                     |
| K16R                 | B25                   | MMC               | 40                         | 43.25                         | 1                     |
| K16R                 | B25                   | MMC               | 40                         | 42.26                         | 2                     |
| WT                   | B25                   | MMC               | 40                         | 59.38                         | 1                     |
| K16R                 | B25                   | MMC               | 60                         | 24.45                         | 1                     |
| K16R                 | B25                   | MMC               | 60                         | 23.36                         | 2                     |
| WT                   | B25                   | MMC               | 60                         | 34.91                         | 1                     |
| K16R                 | B25                   | MMC               | 80                         | 17.70                         | 1                     |
| K16R                 | B25                   | MMC               | 80                         | 18.08                         | 2                     |
| WT                   | B25                   | MMC               | 80                         | 25.50                         | 1                     |
| K16R                 | B25                   | Cisp              | 0.2                        | 78.66                         | 1                     |
| K16R                 | B25                   | Cisp              | 0.2                        | 74.03                         | 2                     |
| WT                   | B25                   | Cisp              | 0.2                        | 49.68                         | 1                     |
| K16R                 | B25                   | Cisp              | 0.4                        | 42.90                         | 1                     |
| K16R                 | B25                   | Cisp              | 0.4                        | 43.84                         | 2                     |
| WT                   | B25                   | Cisp              | 0.4                        | 25.65                         | 1                     |
| K16R                 | B25                   | Cisp              | 0.6                        | 27.12                         | 1                     |
| K16R                 | B25                   | Cisp              | 0.6                        | 27.87                         | 2                     |
| WT                   | B25                   | Cisp              | 0.6                        | 20.32                         | 1                     |
| K16R                 | B25                   | Cisp              | 1                          | 12.47                         | 1                     |
| K16R                 | B25                   | Cisp              | 1                          | 12.41                         | 2                     |
| WT                   | B25                   | Cisp              | 1                          | 14.02                         | 1                     |
| K16R                 | B25                   | Cisp              | 1.2                        | 9.99                          | 1                     |
| K16R                 | B25                   | Cisp              | 1.2                        | 9.59                          | 2                     |
| WT                   | B25                   | Cisp              | 1.2                        | 14.37                         | 1                     |
| K16R                 | B25                   | Cisp              | 1.5                        | 10.14                         | 1                     |
| K16R                 | B25                   | Cisp              | 1.5                        | 9.10                          | 2                     |
| WT                   | B25                   | Cisp              | 1.5                        | 11.28                         | 1                     |
| K16R                 | B25                   | MMS               | 5                          | 66.04                         | 1                     |
| K16R                 | B25                   | MMS               | 5                          | 74.03                         | 2                     |
| WT                   | B25                   | MMS               | 5                          | 49.68                         | 1                     |
| K16R                 | B25                   | MMS               | 10                         | 71.82                         | 1                     |
| K16R                 | B25                   | MMS               | 10                         | 43.84                         | 2                     |
| WT                   | B25                   | MMS               | 10                         | 25.65                         | 1                     |
| K16R                 | B25                   | MMS               | 15                         | 63.44                         | 1                     |
| K16R                 | B25                   | MMS               | 15                         | 27.87                         | 2                     |
| WT                   | B25                   | MMS               | 15                         | 20.32                         | 1                     |
| K16R                 | B25                   | MMS               | 20                         | 45.84                         | 1                     |
| K16R                 | B25                   | MMS               | 20                         | 12.41                         | 2                     |

| Variant <sup>a</sup> | Batch ID <sup>b</sup> | Drug <sup>c</sup> | Concentration <sup>d</sup> | Percent Survived <sup>e</sup> | Clone ID <sup>f</sup> |
|----------------------|-----------------------|-------------------|----------------------------|-------------------------------|-----------------------|
| WT                   | B25                   | MMS               | 20                         | 14.02                         | 1                     |
| K16R                 | B25                   | MMS               | 30                         | 11.71                         | 1                     |
| K16R                 | B25                   | MMS               | 30                         | 9.59                          | 2                     |
| WT                   | B25                   | MMS               | 30                         | 14.37                         | 1                     |
| K16R                 | B25                   | MMS               | 40                         | 4.30                          | 1                     |
| K16R                 | B25                   | MMS               | 40                         | 9.10                          | 2                     |
| WT                   | B25                   | MMS               | 40                         | 11.28                         | 1                     |
| K16R                 | B25                   | Parp              | 0.01                       | 100.00                        | 1                     |
| K16R                 | B25                   | Parp              | 0.01                       | 76.15                         | 2                     |
| WT                   | B25                   | Parp              | 0.01                       | 99.58                         | 1                     |
| K16R                 | B25                   | Parp              | 0.1                        | 75.08                         | 1                     |
| K16R                 | B25                   | Parp              | 0.1                        | 22.00                         | 2                     |
| WT                   | B25                   | Parp              | 0.1                        | 99.82                         | 1                     |
| K16R                 | B25                   | Parp              | 1                          | 45.86                         | 1                     |
| K16R                 | B25                   | Parp              | 1                          | 32.57                         | 2                     |
| WT                   | B25                   | Parp              | 1                          | 85.05                         | 1                     |
| K16R                 | B25                   | Parp              | 10                         | 1.00                          | 1                     |
| K16R                 | B25                   | Parp              | 10                         | 1.00                          | 2                     |
| WT                   | B25                   | Parp              | 10                         | 16.33                         | 1                     |
| K16R                 | B25                   | IR                | 40                         | 89.12                         | 1                     |
| K16R                 | B25                   | IR                | 40                         | 90.88                         | 2                     |
| WT                   | B25                   | IR                | 40                         | 80.46                         | 1                     |
| K16R                 | B25                   | IR                | 100                        | 67.70                         | 1                     |
| K16R                 | B25                   | IR                | 100                        | 77.92                         | 2                     |
| WT                   | B25                   | IR                | 100                        | 67.37                         | 1                     |
| K16R                 | B25                   | IR                | 200                        | 76.82                         | 1                     |
| K16R                 | B25                   | IR                | 200                        | 84.15                         | 2                     |
| WT                   | B25                   | IR                | 200                        | 57.01                         | 1                     |
| K16R                 | B25                   | IR                | 400                        | 41.20                         | 1                     |
| K16R                 | B25                   | IR                | 400                        | 45.66                         | 2                     |
| WT                   | B25                   | IR                | 400                        | 31.55                         | 1                     |
| K16R                 | B25                   | IR                | 600                        | 20.08                         | 1                     |
| K16R                 | B25                   | IR                | 600                        | 25.77                         | 2                     |
| WT                   | B25                   | IR                | 600                        | 14.85                         | 1                     |
| K1883N               | B26                   | Camp              | 2.5                        | 76.00                         | 1                     |
| K1883N               | B26                   | Camp              | 2.5                        | 74.00                         | 2                     |
| WT                   | B26                   | Camp              | 2.5                        | 67.00                         | 1                     |
| K1883N               | B26                   | Camp              | 5                          | 68.00                         | 1                     |
| K1883N               | B26                   | Camp              | 5                          | 61.00                         | 2                     |
| WT                   | B26                   | Camp              | 5                          | 64.00                         | 1                     |



| Variant <sup>a</sup> | Batch ID <sup>b</sup> | Drug <sup>c</sup> | Concentration <sup>d</sup> | Percent Survived <sup>e</sup> | Clone ID <sup>f</sup> |
|----------------------|-----------------------|-------------------|----------------------------|-------------------------------|-----------------------|
| K1883N               | B26                   | Camp              | 25                         | 43.00                         | 1                     |
| K1883N               | B26                   | Camp              | 25                         | 54.00                         | 2                     |
| WT                   | B26                   | Camp              | 25                         | 41.00                         | 1                     |
| K1883N               | B26                   | Camp              | 50                         | 28.00                         | 1                     |
| K1883N               | B26                   | Camp              | 50                         | 39.00                         | 2                     |
| WT                   | B26                   | Camp              | 50                         | 26.00                         | 1                     |
| K1883N               | B26                   | Camp              | 100                        | 18.00                         | 1                     |
| K1883N               | B26                   | Camp              | 100                        | 30.00                         | 2                     |
| WT                   | B26                   | Camp              | 100                        | 16.00                         | 1                     |
| K1883N               | B26                   | Camp              | 200                        | 19.00                         | 1                     |
| K1883N               | B26                   | Camp              | 200                        | 14.00                         | 2                     |
| WT                   | B26                   | Camp              | 200                        | 15.00                         | 1                     |
| K1883N               | B26                   | MMC               | 5                          | 73.00                         | 1                     |
| K1883N               | B26                   | MMC               | 5                          | 87.00                         | 2                     |
| WT                   | B26                   | MMC               | 5                          | 71.00                         | 1                     |
| K1883N               | B26                   | MMC               | 10                         | 54.00                         | 1                     |
| K1883N               | B26                   | MMC               | 10                         | 73.00                         | 2                     |
| WT                   | B26                   | MMC               | 10                         | 58.00                         | 1                     |
| K1883N               | B26                   | MMC               | 20                         | 35.00                         | 1                     |
| K1883N               | B26                   | MMC               | 20                         | 71.00                         | 2                     |
| WT                   | B26                   | MMC               | 20                         | 41.00                         | 1                     |
| K1883N               | B26                   | MMC               | 40                         | 21.00                         | 1                     |
| K1883N               | B26                   | MMC               | 40                         | 51.00                         | 2                     |
| WT                   | B26                   | MMC               | 40                         | 16.00                         | 1                     |
| K1883N               | B26                   | MMC               | 60                         | 13.00                         | 1                     |
| K1883N               | B26                   | MMC               | 60                         | 37.00                         | 2                     |
| WT                   | B26                   | MMC               | 60                         | 10.00                         | 1                     |
| K1883N               | B26                   | MMC               | 80                         | 13.00                         | 1                     |
| K1883N               | B26                   | MMC               | 80                         | 23.00                         | 2                     |
| WT                   | B26                   | MMC               | 80                         | 9.00                          | 1                     |
| K1883N               | B26                   | Cisp              | 0.2                        | 47.00                         | 1                     |
| K1883N               | B26                   | Cisp              | 0.2                        | 81.00                         | 2                     |
| WT                   | B26                   | Cisp              | 0.2                        | 46.00                         | 1                     |
| K1883N               | B26                   | Cisp              | 0.4                        | 26.00                         | 1                     |
| K1883N               | B26                   | Cisp              | 0.4                        | 66.00                         | 2                     |
| WT                   | B26                   | Cisp              | 0.4                        | 20.00                         | 1                     |
| K1883N               | B26                   | Cisp              | 0.6                        | 22.00                         | 1                     |
| K1883N               | B26                   | Cisp              | 0.6                        | 51.00                         | 2                     |
| WT                   | B26                   | Cisp              | 0.6                        | 15.00                         | 1                     |
| K1883N               | B26                   | Cisp              | 1                          | 16.00                         | 1                     |

| Variant <sup>a</sup> | Batch ID <sup>b</sup> | Drug <sup>c</sup> | Concentration <sup>d</sup> | Percent Survived <sup>e</sup> | Clone ID <sup>f</sup> |
|----------------------|-----------------------|-------------------|----------------------------|-------------------------------|-----------------------|
| K1883N               | B26                   | Cisp              | 1                          | 28.00                         | 2                     |
| WT                   | B26                   | Cisp              | 1                          | 10.00                         | 1                     |
| K1883N               | B26                   | Cisp              | 1.2                        | 16.00                         | 1                     |
| K1883N               | B26                   | Cisp              | 1.2                        | 28.00                         | 2                     |
| WT                   | B26                   | Cisp              | 1.2                        | 9.00                          | 1                     |
| K1883N               | B26                   | Cisp              | 1.5                        | 17.00                         | 1                     |
| K1883N               | B26                   | Cisp              | 1.5                        | 23.00                         | 2                     |
| WT                   | B26                   | Cisp              | 1.5                        | 11.00                         | 1                     |
| K1883N               | B26                   | MMS               | 5                          | 54.00                         | 1                     |
| K1883N               | B26                   | MMS               | 5                          | 65.00                         | 2                     |
| WT                   | B26                   | MMS               | 5                          | 62.00                         | 1                     |
| K1883N               | B26                   | MMS               | 10                         | 33.00                         | 1                     |
| K1883N               | B26                   | MMS               | 10                         | 47.00                         | 2                     |
| WT                   | B26                   | MMS               | 10                         | 32.00                         | 1                     |
| K1883N               | B26                   | MMS               | 15                         | 18.00                         | 1                     |
| K1883N               | B26                   | MMS               | 15                         | 37.00                         | 2                     |
| WT                   | B26                   | MMS               | 15                         | 14.00                         | 1                     |
| K1883N               | B26                   | MMS               | 20                         | 18.00                         | 1                     |
| K1883N               | B26                   | MMS               | 20                         | 26.00                         | 2                     |
| WT                   | B26                   | MMS               | 20                         | 8.00                          | 1                     |
| K1883N               | B26                   | MMS               | 30                         | 12.00                         | 1                     |
| K1883N               | B26                   | MMS               | 30                         | 13.00                         | 2                     |
| WT                   | B26                   | MMS               | 30                         | 3.00                          | 1                     |
| K1883N               | B26                   | MMS               | 40                         | 10.00                         | 1                     |
| K1883N               | B26                   | MMS               | 40                         | 7.00                          | 2                     |
| WT                   | B26                   | MMS               | 40                         | 6.00                          | 1                     |
| K1883N               | B26                   | Parp              | 0.01                       | 47.00                         | 1                     |
| K1883N               | B26                   | Parp              | 0.01                       | 69.00                         | 2                     |
| WT                   | B26                   | Parp              | 0.01                       | 46.00                         | 1                     |
| K1883N               | B26                   | Parp              | 0.1                        | 25.00                         | 1                     |
| K1883N               | B26                   | Parp              | 0.1                        | 53.00                         | 2                     |
| WT                   | B26                   | Parp              | 0.1                        | 21.00                         | 1                     |
| K1883N               | B26                   | Parp              | 1                          | 23.00                         | 1                     |
| K1883N               | B26                   | Parp              | 1                          | 39.00                         | 2                     |
| WT                   | B26                   | Parp              | 1                          | 17.00                         | 1                     |
| K1883N               | B26                   | Parp              | 10                         | 17.00                         | 1                     |
| K1883N               | B26                   | Parp              | 10                         | 5.00                          | 2                     |
| WT                   | B26                   | Parp              | 10                         | 8.00                          | 1                     |
| K1883N               | B26                   | IR                | 50                         | 24.00                         | 1                     |
| K1883N               | B26                   | IR                | 50                         | 43.00                         | 2                     |

| Variant <sup>a</sup> | Batch ID <sup>b</sup> | Drug <sup>c</sup> | Concentration <sup>d</sup> | Percent Survived <sup>e</sup> | Clone ID <sup>f</sup> |
|----------------------|-----------------------|-------------------|----------------------------|-------------------------------|-----------------------|
| WT                   | B26                   | IR                | 50                         | 26.00                         | 1                     |
| K1883N               | B26                   | IR                | 100                        | 21.00                         | 1                     |
| K1883N               | B26                   | IR                | 100                        | 34.00                         | 2                     |
| WT                   | B26                   | IR                | 100                        | 25.00                         | 1                     |
| K1883N               | B26                   | IR                | 200                        | 15.00                         | 1                     |
| K1883N               | B26                   | IR                | 200                        | 32.00                         | 2                     |
| WT                   | B26                   | IR                | 200                        | 18.00                         | 1                     |
| K1883N               | B26                   | IR                | 400                        | 11.00                         | 1                     |
| K1883N               | B26                   | IR                | 400                        | 21.00                         | 2                     |
| WT                   | B26                   | IR                | 400                        | 10.00                         | 1                     |
| K1883N               | B26                   | IR                | 600                        | 11.00                         | 1                     |
| K1883N               | B26                   | IR                | 600                        | 22.00                         | 2                     |
| WT                   | B26                   | IR                | 600                        | 8.00                          | 1                     |
| D1781N               | B27                   | Camp              | 2.5                        | 66.07                         | 1                     |
| D1781N               | B27                   | Camp              | 2.5                        | 87.79                         | 2                     |
| WT                   | B27                   | Camp              | 2.5                        | 60.95                         | 1                     |
| D1781N               | B27                   | Camp              | 5                          | 69.18                         | 1                     |
| D1781N               | B27                   | Camp              | 5                          | 80.02                         | 2                     |
| WT                   | B27                   | Camp              | 5                          | 62.14                         | 1                     |
| D1781N               | B27                   | Camp              | 25                         | 44.80                         | 1                     |
| D1781N               | B27                   | Camp              | 25                         | 59.81                         | 2                     |
| WT                   | B27                   | Camp              | 25                         | 44.40                         | 1                     |
| D1781N               | B27                   | Camp              | 50                         | 15.51                         | 1                     |
| D1781N               | B27                   | Camp              | 50                         | 20.63                         | 2                     |
| WT                   | B27                   | Camp              | 50                         | 23.79                         | 1                     |
| D1781N               | B27                   | Camp              | 100                        | 4.37                          | 1                     |
| D1781N               | B27                   | Camp              | 100                        | 4.09                          | 2                     |
| WT                   | B27                   | Camp              | 100                        | 9.51                          | 1                     |
| D1781N               | B27                   | Camp              | 200                        | 1.66                          | 1                     |
| D1781N               | B27                   | Camp              | 200                        | 1.72                          | 2                     |
| WT                   | B27                   | Camp              | 200                        | 5.85                          | 1                     |
| D1781N               | B27                   | MMC               | 5                          | 59.31                         | 1                     |
| D1781N               | B27                   | MMC               | 5                          | 58.15                         | 2                     |
| WT                   | B27                   | MMC               | 5                          | 51.63                         | 1                     |
| D1781N               | B27                   | MMC               | 10                         | 43.70                         | 1                     |
| D1781N               | B27                   | MMC               | 10                         | 46.91                         | 2                     |
| WT                   | B27                   | MMC               | 10                         | 47.53                         | 1                     |
| D1781N               | B27                   | MMC               | 20                         | 34.81                         | 1                     |
| D1781N               | B27                   | MMC               | 20                         | 41.58                         | 2                     |
| WT                   | B27                   | MMC               | 20                         | 32.42                         | 1                     |

| Variant <sup>a</sup> | Batch ID <sup>b</sup> | Drug <sup>c</sup> | Concentration <sup>d</sup> | Percent Survived <sup>e</sup> | Clone ID <sup>f</sup> |
|----------------------|-----------------------|-------------------|----------------------------|-------------------------------|-----------------------|
| D1781N               | B27                   | MMC               | 40                         | 15.11                         | 1                     |
| D1781N               | B27                   | MMC               | 40                         | 19.16                         | 2                     |
| WT                   | B27                   | MMC               | 40                         | 18.15                         | 1                     |
| D1781N               | B27                   | MMC               | 60                         | 8.09                          | 1                     |
| D1781N               | B27                   | MMC               | 60                         | 5.07                          | 2                     |
| WT                   | B27                   | MMC               | 60                         | 9.34                          | 1                     |
| D1781N               | B27                   | MMC               | 80                         | 7.02                          | 1                     |
| D1781N               | B27                   | MMC               | 80                         | 4.49                          | 2                     |
| WT                   | B27                   | MMC               | 80                         | 8.60                          | 1                     |
| D1781N               | B27                   | Cisp              | 0.2                        | 51.19                         | 1                     |
| D1781N               | B27                   | Cisp              | 0.2                        | 50.93                         | 2                     |
| WT                   | B27                   | Cisp              | 0.2                        | 48.90                         | 1                     |
| D1781N               | B27                   | Cisp              | 0.4                        | 33.73                         | 1                     |
| D1781N               | B27                   | Cisp              | 0.4                        | 26.06                         | 2                     |
| WT                   | B27                   | Cisp              | 0.4                        | 31.66                         | 1                     |
| D1781N               | B27                   | Cisp              | 0.6                        | 17.68                         | 1                     |
| D1781N               | B27                   | Cisp              | 0.6                        | 16.13                         | 2                     |
| WT                   | B27                   | Cisp              | 0.6                        | 21.88                         | 1                     |
| D1781N               | B27                   | Cisp              | 1                          | 5.65                          | 1                     |
| D1781N               | B27                   | Cisp              | 1                          | 9.93                          | 2                     |
| WT                   | B27                   | Cisp              | 1                          | 13.45                         | 1                     |
| D1781N               | B27                   | Cisp              | 1.2                        | 3.94                          | 1                     |
| D1781N               | B27                   | Cisp              | 1.2                        | 8.89                          | 2                     |
| WT                   | B27                   | Cisp              | 1.2                        | 10.02                         | 1                     |
| D1781N               | B27                   | Cisp              | 1.5                        | 4.31                          | 1                     |
| D1781N               | B27                   | Cisp              | 1.5                        | 8.96                          | 2                     |
| WT                   | B27                   | Cisp              | 1.5                        | 11.61                         | 1                     |
| D1781N               | B27                   | MMS               | 5                          | 59.40                         | 1                     |
| D1781N               | B27                   | MMS               | 5                          | 63.66                         | 2                     |
| WT                   | B27                   | MMS               | 5                          | 70.61                         | 1                     |
| D1781N               | B27                   | MMS               | 10                         | 45.17                         | 1                     |
| D1781N               | B27                   | MMS               | 10                         | 45.05                         | 2                     |
| WT                   | B27                   | MMS               | 10                         | 46.49                         | 1                     |
| D1781N               | B27                   | MMS               | 15                         | 19.64                         | 1                     |
| D1781N               | B27                   | MMS               | 15                         | 25.95                         | 2                     |
| WT                   | B27                   | MMS               | 15                         | 34.89                         | 1                     |
| D1781N               | B27                   | MMS               | 20                         | 15.08                         | 1                     |
| D1781N               | B27                   | MMS               | 20                         | 15.25                         | 2                     |
| WT                   | B27                   | MMS               | 20                         | 17.68                         | 1                     |
| D1781N               | B27                   | MMS               | 30                         | 4.95                          | 1                     |

| Variant <sup>a</sup> | Batch ID <sup>b</sup> | Drug <sup>c</sup> | Concentration <sup>d</sup> | Percent Survived <sup>e</sup> | Clone ID <sup>f</sup> |
|----------------------|-----------------------|-------------------|----------------------------|-------------------------------|-----------------------|
| D1781N               | B27                   | MMS               | 30                         | 2.61                          | 2                     |
| WT                   | B27                   | MMS               | 30                         | 9.02                          | 1                     |
| D1781N               | B27                   | MMS               | 40                         | 4.02                          | 1                     |
| D1781N               | B27                   | MMS               | 40                         | 2.24                          | 2                     |
| WT                   | B27                   | MMS               | 40                         | 4.45                          | 1                     |
| D1781N               | B27                   | Parp              | 0.01                       | 62.87                         | 1                     |
| D1781N               | B27                   | Parp              | 0.01                       | 90.06                         | 2                     |
| WT                   | B27                   | Parp              | 0.01                       | 58.12                         | 1                     |
| D1781N               | B27                   | Parp              | 0.1                        | 44.25                         | 1                     |
| D1781N               | B27                   | Parp              | 0.1                        | 62.27                         | 2                     |
| WT                   | B27                   | Parp              | 0.1                        | 50.61                         | 1                     |
| D1781N               | B27                   | Parp              | 1                          | 9.72                          | 1                     |
| D1781N               | B27                   | Parp              | 1                          | 15.80                         | 2                     |
| WT                   | B27                   | Parp              | 1                          | 24.58                         | 1                     |
| D1781N               | B27                   | Parp              | 10                         | 4.70                          | 1                     |
| D1781N               | B27                   | Parp              | 10                         | 2.67                          | 2                     |
| WT                   | B27                   | Parp              | 10                         | 6.14                          | 1                     |
| D1781N               | B27                   | IR                | 50                         | 88.89                         | 1                     |
| D1781N               | B27                   | IR                | 50                         | 100.00                        | 2                     |
| WT                   | B27                   | IR                | 50                         | 95.51                         | 1                     |
| D1781N               | B27                   | IR                | 100                        | 72.05                         | 1                     |
| D1781N               | B27                   | IR                | 100                        | 66.24                         | 2                     |
| WT                   | B27                   | IR                | 100                        | 71.47                         | 1                     |
| D1781N               | B27                   | IR                | 200                        | 55.21                         | 1                     |
| D1781N               | B27                   | IR                | 200                        | 67.08                         | 2                     |
| WT                   | B27                   | IR                | 200                        | 62.93                         | 1                     |
| D1781N               | B27                   | IR                | 400                        | 23.25                         | 1                     |
| D1781N               | B27                   | IR                | 400                        | 28.46                         | 2                     |
| WT                   | B27                   | IR                | 400                        | 34.62                         | 1                     |
| D1781N               | B27                   | IR                | 600                        | 16.92                         | 1                     |
| D1781N               | B27                   | IR                | 600                        | 20.25                         | 2                     |
| WT                   | B27                   | IR                | 600                        | 20.51                         | 1                     |
| I1884T               | B28                   | Camp              | 2.5                        | 89.53                         | 1                     |
| I1884T               | B28                   | Camp              | 2.5                        | 59.55                         | 2                     |
| WT                   | B28                   | Camp              | 2.5                        | 86.75                         | 1                     |
| I1884T               | B28                   | Camp              | 5                          | 71.24                         | 1                     |
| I1884T               | B28                   | Camp              | 5                          | 47.53                         | 2                     |
| WT                   | B28                   | Camp              | 5                          | 69.66                         | 1                     |
| I1884T               | B28                   | Camp              | 25                         | 31.50                         | 1                     |
| I1884T               | B28                   | Camp              | 25                         | 14.55                         | 2                     |

| Variant <sup>a</sup> | Batch ID <sup>b</sup> | Drug <sup>c</sup> | Concentration <sup>d</sup> | Percent Survived <sup>e</sup> | Clone ID <sup>f</sup> |
|----------------------|-----------------------|-------------------|----------------------------|-------------------------------|-----------------------|
| WT                   | B28                   | Camp              | 25                         | 43.74                         | 1                     |
| I1884T               | B28                   | Camp              | 50                         | 7.21                          | 1                     |
| I1884T               | B28                   | Camp              | 50                         | 1.00                          | 2                     |
| WT                   | B28                   | Camp              | 50                         | 17.53                         | 1                     |
| I1884T               | B28                   | Camp              | 100                        | 1.12                          | 1                     |
| I1884T               | B28                   | Camp              | 100                        | 1.00                          | 2                     |
| WT                   | B28                   | Camp              | 100                        | 4.86                          | 1                     |
| I1884T               | B28                   | Camp              | 200                        | 1.55                          | 1                     |
| I1884T               | B28                   | Camp              | 200                        | 1.00                          | 2                     |
| WT                   | B28                   | Camp              | 200                        | 5.74                          | 1                     |
| I1884T               | B28                   | MMC               | 5                          | 91.40                         | 1                     |
| I1884T               | B28                   | MMC               | 5                          | 37.46                         | 2                     |
| WT                   | B28                   | MMC               | 5                          | 75.38                         | 1                     |
| I1884T               | B28                   | MMC               | 10                         | 53.55                         | 1                     |
| I1884T               | B28                   | MMC               | 10                         | 8.07                          | 2                     |
| WT                   | B28                   | MMC               | 10                         | 64.87                         | 1                     |
| I1884T               | B28                   | MMC               | 20                         | 39.44                         | 1                     |
| I1884T               | B28                   | MMC               | 20                         | 6.77                          | 2                     |
| WT                   | B28                   | MMC               | 20                         | 38.73                         | 1                     |
| I1884T               | B28                   | MMC               | 40                         | 9.53                          | 1                     |
| I1884T               | B28                   | MMC               | 40                         | 1.00                          | 2                     |
| WT                   | B28                   | MMC               | 40                         | 17.29                         | 1                     |
| I1884T               | B28                   | MMC               | 60                         | 2.24                          | 1                     |
| I1884T               | B28                   | MMC               | 60                         | 1.00                          | 2                     |
| WT                   | B28                   | MMC               | 60                         | 7.61                          | 1                     |
| I1884T               | B28                   | MMC               | 80                         | 2.52                          | 1                     |
| I1884T               | B28                   | MMC               | 80                         | 1.00                          | 2                     |
| WT                   | B28                   | MMC               | 80                         | 7.88                          | 1                     |
| I1884T               | B28                   | Cisp              | 0.2                        | 26.25                         | 1                     |
| I1884T               | B28                   | Cisp              | 0.2                        | 3.47                          | 2                     |
| WT                   | B28                   | Cisp              | 0.2                        | 41.86                         | 1                     |
| I1884T               | B28                   | Cisp              | 0.4                        | 4.99                          | 1                     |
| I1884T               | B28                   | Cisp              | 0.4                        | 1.00                          | 2                     |
| WT                   | B28                   | Cisp              | 0.4                        | 22.09                         | 1                     |
| I1884T               | B28                   | Cisp              | 0.6                        | 3.05                          | 1                     |
| I1884T               | B28                   | Cisp              | 0.6                        | 1.00                          | 2                     |
| WT                   | B28                   | Cisp              | 0.6                        | 13.29                         | 1                     |
| I1884T               | B28                   | Cisp              | 1                          | 1.00                          | 1                     |
| I1884T               | B28                   | Cisp              | 1                          | 1.00                          | 2                     |
| WT                   | B28                   | Cisp              | 1                          | 10.13                         | 1                     |

| Variant <sup>a</sup> | Batch ID <sup>b</sup> | Drug <sup>c</sup> | Concentration <sup>d</sup> | Percent Survived <sup>e</sup> | Clone ID <sup>f</sup> |
|----------------------|-----------------------|-------------------|----------------------------|-------------------------------|-----------------------|
| I1884T               | B28                   | Cisp              | 1.2                        | 1.00                          | 1                     |
| I1884T               | B28                   | Cisp              | 1.2                        | 1.00                          | 2                     |
| WT                   | B28                   | Cisp              | 1.2                        | 6.98                          | 1                     |
| I1884T               | B28                   | Cisp              | 1.5                        | 1.00                          | 1                     |
| I1884T               | B28                   | Cisp              | 1.5                        | 1.00                          | 2                     |
| WT                   | B28                   | Cisp              | 1.5                        | 8.80                          | 1                     |
| I1884T               | B28                   | MMS               | 5                          | 55.22                         | 1                     |
| I1884T               | B28                   | MMS               | 5                          | 36.35                         | 2                     |
| WT                   | B28                   | MMS               | 5                          | 60.12                         | 1                     |
| I1884T               | B28                   | MMS               | 10                         | 31.94                         | 1                     |
| I1884T               | B28                   | MMS               | 10                         | 17.29                         | 2                     |
| WT                   | B28                   | MMS               | 10                         | 43.95                         | 1                     |
| I1884T               | B28                   | MMS               | 15                         | 13.51                         | 1                     |
| I1884T               | B28                   | MMS               | 15                         | 1.00                          | 2                     |
| WT                   | B28                   | MMS               | 15                         | 25.93                         | 1                     |
| I1884T               | B28                   | MMS               | 20                         | 4.39                          | 1                     |
| I1884T               | B28                   | MMS               | 20                         | 1.00                          | 2                     |
| WT                   | B28                   | MMS               | 20                         | 16.51                         | 1                     |
| I1884T               | B28                   | MMS               | 30                         | 1.00                          | 1                     |
| I1884T               | B28                   | MMS               | 30                         | 1.00                          | 2                     |
| WT                   | B28                   | MMS               | 30                         | 7.09                          | 1                     |
| I1884T               | B28                   | MMS               | 40                         | 2.13                          | 1                     |
| I1884T               | B28                   | MMS               | 40                         | 1.00                          | 2                     |
| WT                   | B28                   | MMS               | 40                         | 10.47                         | 1                     |
| I1884T               | B28                   | Parp              | 0.01                       | 63.71                         | 1                     |
| I1884T               | B28                   | Parp              | 0.01                       | 42.86                         | 2                     |
| WT                   | B28                   | Parp              | 0.01                       | 81.03                         | 1                     |
| I1884T               | B28                   | Parp              | 0.1                        | 39.11                         | 1                     |
| I1884T               | B28                   | Parp              | 0.1                        | 23.27                         | 2                     |
| WT                   | B28                   | Parp              | 0.1                        | 48.58                         | 1                     |
| I1884T               | B28                   | Parp              | 1                          | 9.10                          | 1                     |
| I1884T               | B28                   | Parp              | 1                          | 1.00                          | 2                     |
| WT                   | B28                   | Parp              | 1                          | 18.09                         | 1                     |
| I1884T               | B28                   | Parp              | 10                         | 2.93                          | 1                     |
| I1884T               | B28                   | Parp              | 10                         | 1.00                          | 2                     |
| WT                   | B28                   | Parp              | 10                         | 11.35                         | 1                     |
| I1884T               | B28                   | IR                | 50                         | 85.31                         | 1                     |
| I1884T               | B28                   | IR                | 50                         | 89.83                         | 2                     |
| WT                   | B28                   | IR                | 50                         | 100.00                        | 1                     |
| I1884T               | B28                   | IR                | 100                        | 84.62                         | 1                     |

| Variant <sup>a</sup> | Batch ID <sup>b</sup> | Drug <sup>c</sup> | Concentration <sup>d</sup> | Percent Survived <sup>e</sup> | Clone ID <sup>f</sup> |
|----------------------|-----------------------|-------------------|----------------------------|-------------------------------|-----------------------|
| I1884T               | B28                   | IR                | 100                        | 80.60                         | 2                     |
| WT                   | B28                   | IR                | 100                        | 73.86                         | 1                     |
| I1884T               | B28                   | IR                | 200                        | 55.33                         | 1                     |
| I1884T               | B28                   | IR                | 200                        | 73.88                         | 2                     |
| WT                   | B28                   | IR                | 200                        | 72.81                         | 1                     |
| I1884T               | B28                   | IR                | 400                        | 29.19                         | 1                     |
| I1884T               | B28                   | IR                | 400                        | 30.41                         | 2                     |
| WT                   | B28                   | IR                | 400                        | 36.32                         | 1                     |
| I1884T               | B28                   | IR                | 600                        | 23.37                         | 1                     |
| I1884T               | B28                   | IR                | 600                        | 17.16                         | 2                     |
| WT                   | B28                   | IR                | 600                        | 26.32                         | 1                     |
| V220lfs              | B29                   | Camp              | 2.5                        | 100.00                        | 1                     |
| V220lfs              | B29                   | Camp              | 2.5                        | 85.95                         | 2                     |
| WT                   | B29                   | Camp              | 2.5                        | 99.27                         | 1                     |
| V220lfs              | B29                   | Camp              | 5                          | 100.00                        | 1                     |
| V220lfs              | B29                   | Camp              | 5                          | 78.71                         | 2                     |
| WT                   | B29                   | Camp              | 5                          | 100.00                        | 1                     |
| V220lfs              | B29                   | Camp              | 25                         | 52.82                         | 1                     |
| V220lfs              | B29                   | Camp              | 25                         | 5.79                          | 2                     |
| WT                   | B29                   | Camp              | 25                         | 84.28                         | 1                     |
| V220lfs              | B29                   | Camp              | 50                         | 6.21                          | 1                     |
| V220lfs              | B29                   | Camp              | 50                         | 1.00                          | 2                     |
| WT                   | B29                   | Camp              | 50                         | 61.46                         | 1                     |
| V220lfs              | B29                   | Camp              | 100                        | 1.00                          | 1                     |
| V220lfs              | B29                   | Camp              | 100                        | 1.00                          | 2                     |
| WT                   | B29                   | Camp              | 100                        | 10.31                         | 1                     |
| V220lfs              | B29                   | Camp              | 200                        | 1.00                          | 1                     |
| V220lfs              | B29                   | Camp              | 200                        | 1.00                          | 2                     |
| WT                   | B29                   | Camp              | 200                        | 1.92                          | 1                     |
| V220lfs              | B29                   | MMC               | 5                          | 75.93                         | 1                     |
| V220lfs              | B29                   | MMC               | 5                          | 40.31                         | 2                     |
| WT                   | B29                   | MMC               | 5                          | 100.00                        | 1                     |
| V220lfs              | B29                   | MMC               | 10                         | 65.24                         | 1                     |
| V220lfs              | B29                   | MMC               | 10                         | 13.36                         | 2                     |
| WT                   | B29                   | MMC               | 10                         | 100.00                        | 1                     |
| V220lfs              | B29                   | MMC               | 20                         | 18.56                         | 1                     |
| V220lfs              | B29                   | MMC               | 20                         | 1.00                          | 2                     |
| WT                   | B29                   | MMC               | 20                         | 80.58                         | 1                     |
| V220lfs              | B29                   | MMC               | 40                         | 3.60                          | 1                     |
| V220lfs              | B29                   | MMC               | 40                         | 1.00                          | 2                     |



| Variant <sup>a</sup> | Batch ID <sup>b</sup> | Drug <sup>c</sup> | Concentration <sup>d</sup> | Percent Survived <sup>e</sup> | Clone ID <sup>f</sup> |
|----------------------|-----------------------|-------------------|----------------------------|-------------------------------|-----------------------|
| WT                   | B29                   | MMC               | 40                         | 62.97                         | 1                     |
| V220lfs              | B29                   | MMC               | 60                         | 1.35                          | 1                     |
| V220lfs              | B29                   | MMC               | 60                         | 1.00                          | 2                     |
| WT                   | B29                   | MMC               | 60                         | 39.00                         | 1                     |
| V220lfs              | B29                   | MMC               | 80                         | 2.25                          | 1                     |
| V220lfs              | B29                   | MMC               | 80                         | 1.00                          | 2                     |
| WT                   | B29                   | MMC               | 80                         | 20.94                         | 1                     |
| V220lfs              | B29                   | Cisp              | 0.2                        | 26.04                         | 1                     |
| V220lfs              | B29                   | Cisp              | 0.2                        | 9.23                          | 2                     |
| WT                   | B29                   | Cisp              | 0.2                        | 62.89                         | 1                     |
| V220lfs              | B29                   | Cisp              | 0.4                        | 6.38                          | 1                     |
| V220lfs              | B29                   | Cisp              | 0.4                        | 1.00                          | 2                     |
| WT                   | B29                   | Cisp              | 0.4                        | 46.89                         | 1                     |
| V220lfs              | B29                   | Cisp              | 0.6                        | 1.00                          | 1                     |
| V220lfs              | B29                   | Cisp              | 0.6                        | 1.00                          | 2                     |
| WT                   | B29                   | Cisp              | 0.6                        | 14.33                         | 1                     |
| V220lfs              | B29                   | Cisp              | 1                          | 1.51                          | 1                     |
| V220lfs              | B29                   | Cisp              | 1                          | 1.00                          | 2                     |
| WT                   | B29                   | Cisp              | 1                          | 11.45                         | 1                     |
| V220lfs              | B29                   | Cisp              | 1.2                        | 1.15                          | 1                     |
| V220lfs              | B29                   | Cisp              | 1.2                        | 1.00                          | 2                     |
| WT                   | B29                   | Cisp              | 1.2                        | 6.27                          | 1                     |
| V220lfs              | B29                   | Cisp              | 1.5                        | 1.29                          | 1                     |
| V220lfs              | B29                   | Cisp              | 1.5                        | 1.00                          | 2                     |
| WT                   | B29                   | Cisp              | 1.5                        | 5.18                          | 1                     |
| V220lfs              | B29                   | MMS               | 5                          | 81.19                         | 1                     |
| V220lfs              | B29                   | MMS               | 5                          | 66.87                         | 2                     |
| WT                   | B29                   | MMS               | 5                          | 100.00                        | 1                     |
| V220lfs              | B29                   | MMS               | 10                         | 43.49                         | 1                     |
| V220lfs              | B29                   | MMS               | 10                         | 13.51                         | 2                     |
| WT                   | B29                   | MMS               | 10                         | 99.87                         | 1                     |
| V220lfs              | B29                   | MMS               | 15                         | 14.55                         | 1                     |
| V220lfs              | B29                   | MMS               | 15                         | 2.67                          | 2                     |
| WT                   | B29                   | MMS               | 15                         | 95.09                         | 1                     |
| V220lfs              | B29                   | MMS               | 20                         | 2.67                          | 1                     |
| V220lfs              | B29                   | MMS               | 20                         | 1.00                          | 2                     |
| WT                   | B29                   | MMS               | 20                         | 71.64                         | 1                     |
| V220lfs              | B29                   | MMS               | 30                         | 1.00                          | 1                     |
| V220lfs              | B29                   | MMS               | 30                         | 1.00                          | 2                     |
| WT                   | B29                   | MMS               | 30                         | 32.39                         | 1                     |

| Variant <sup>a</sup> | Batch ID <sup>b</sup> | Drug <sup>c</sup> | Concentration <sup>d</sup> | Percent Survived <sup>e</sup> | Clone ID <sup>f</sup> |
|----------------------|-----------------------|-------------------|----------------------------|-------------------------------|-----------------------|
| V220lfs              | B29                   | MMS               | 40                         | 1.07                          | 1                     |
| V220lfs              | B29                   | MMS               | 40                         | 1.00                          | 2                     |
| WT                   | B29                   | MMS               | 40                         | 8.00                          | 1                     |
| V220lfs              | B29                   | Parp              | 0.01                       | 73.54                         | 1                     |
| V220lfs              | B29                   | Parp              | 0.01                       | 37.82                         | 2                     |
| WT                   | B29                   | Parp              | 0.01                       | 98.15                         | 1                     |
| V220lfs              | B29                   | Parp              | 0.1                        | 34.81                         | 1                     |
| V220lfs              | B29                   | Parp              | 0.1                        | 2.13                          | 2                     |
| WT                   | B29                   | Parp              | 0.1                        | 87.48                         | 1                     |
| V220lfs              | B29                   | Parp              | 1                          | 3.34                          | 1                     |
| V220lfs              | B29                   | Parp              | 1                          | 1.00                          | 2                     |
| WT                   | B29                   | Parp              | 1                          | 64.64                         | 1                     |
| V220lfs              | B29                   | Parp              | 10                         | 2.00                          | 1                     |
| V220lfs              | B29                   | Parp              | 10                         | 1.00                          | 2                     |
| WT                   | B29                   | Parp              | 10                         | 11.39                         | 1                     |
| V220lfs              | B29                   | IR                | 50                         | 88.80                         | 1                     |
| V220lfs              | B29                   | IR                | 50                         | 82.48                         | 2                     |
| WT                   | B29                   | IR                | 50                         | 100.00                        | 1                     |
| V220lfs              | B29                   | IR                | 100                        | 55.06                         | 1                     |
| V220lfs              | B29                   | IR                | 100                        | 38.99                         | 2                     |
| WT                   | B29                   | IR                | 100                        | 80.92                         | 1                     |
| V220lfs              | B29                   | IR                | 200                        | 34.13                         | 1                     |
| V220lfs              | B29                   | IR                | 200                        | 24.31                         | 2                     |
| WT                   | B29                   | IR                | 200                        | 69.57                         | 1                     |
| V220lfs              | B29                   | IR                | 400                        | 8.80                          | 1                     |
| V220lfs              | B29                   | IR                | 400                        | 8.72                          | 2                     |
| WT                   | B29                   | IR                | 400                        | 45.41                         | 1                     |
| V220lfs              | B29                   | IR                | 600                        | 7.72                          | 1                     |
| V220lfs              | B29                   | IR                | 600                        | 7.52                          | 2                     |
| WT                   | B29                   | IR                | 600                        | 29.37                         | 1                     |
| C3069X               | B30                   | Camp              | 2.5                        | 82.56                         | 1                     |
| C3069X               | B30                   | Camp              | 2.5                        | 69.10                         | 2                     |
| WT                   | B30                   | Camp              | 2.5                        | 92.65                         | 1                     |
| C3069X               | B30                   | Camp              | 5                          | 72.85                         | 1                     |
| C3069X               | B30                   | Camp              | 5                          | 73.82                         | 2                     |
| WT                   | B30                   | Camp              | 5                          | 91.02                         | 1                     |
| C3069X               | B30                   | Camp              | 25                         | 16.67                         | 1                     |
| C3069X               | B30                   | Camp              | 25                         | 6.16                          | 2                     |
| WT                   | B30                   | Camp              | 25                         | 61.35                         | 1                     |
| C3069X               | B30                   | Camp              | 50                         | 5.30                          | 1                     |

| Variant <sup>a</sup> | Batch ID <sup>b</sup> | Drug <sup>c</sup> | Concentration <sup>d</sup> | Percent Survived <sup>e</sup> | Clone ID <sup>f</sup> |
|----------------------|-----------------------|-------------------|----------------------------|-------------------------------|-----------------------|
| C3069X               | B30                   | Camp              | 50                         | 3.29                          | 2                     |
| WT                   | B30                   | Camp              | 50                         | 30.59                         | 1                     |
| C3069X               | B30                   | Camp              | 100                        | 1.66                          | 1                     |
| C3069X               | B30                   | Camp              | 100                        | 2.36                          | 2                     |
| WT                   | B30                   | Camp              | 100                        | 4.90                          | 1                     |
| C3069X               | B30                   | Camp              | 200                        | 2.32                          | 1                     |
| C3069X               | B30                   | Camp              | 200                        | 2.87                          | 2                     |
| WT                   | B30                   | Camp              | 200                        | 1.96                          | 1                     |
| C3069X               | B30                   | MMC               | 5                          | 77.94                         | 1                     |
| C3069X               | B30                   | MMC               | 5                          | 45.89                         | 2                     |
| WT                   | B30                   | MMC               | 5                          | 100.00                        | 1                     |
| C3069X               | B30                   | MMC               | 10                         | 33.67                         | 1                     |
| C3069X               | B30                   | MMC               | 10                         | 21.71                         | 2                     |
| WT                   | B30                   | MMC               | 10                         | 97.28                         | 1                     |
| C3069X               | B30                   | MMC               | 20                         | 16.58                         | 1                     |
| C3069X               | B30                   | MMC               | 20                         | 15.19                         | 2                     |
| WT                   | B30                   | MMC               | 20                         | 58.44                         | 1                     |
| C3069X               | B30                   | MMC               | 40                         | 7.13                          | 1                     |
| C3069X               | B30                   | MMC               | 40                         | 9.77                          | 2                     |
| WT                   | B30                   | MMC               | 40                         | 26.01                         | 1                     |
| C3069X               | B30                   | MMC               | 60                         | 4.98                          | 1                     |
| C3069X               | B30                   | MMC               | 60                         | 8.37                          | 2                     |
| WT                   | B30                   | MMC               | 60                         | 11.95                         | 1                     |
| C3069X               | B30                   | MMC               | 80                         | 5.97                          | 1                     |
| C3069X               | B30                   | MMC               | 80                         | 7.75                          | 2                     |
| WT                   | B30                   | MMC               | 80                         | 8.70                          | 1                     |
| C3069X               | B30                   | Cisp              | 0.2                        | 26.71                         | 1                     |
| C3069X               | B30                   | Cisp              | 0.2                        | 22.00                         | 2                     |
| WT                   | B30                   | Cisp              | 0.2                        | 58.07                         | 1                     |
| C3069X               | B30                   | Cisp              | 0.4                        | 10.54                         | 1                     |
| C3069X               | B30                   | Cisp              | 0.4                        | 8.57                          | 2                     |
| WT                   | B30                   | Cisp              | 0.4                        | 33.53                         | 1                     |
| C3069X               | B30                   | Cisp              | 0.6                        | 6.83                          | 1                     |
| C3069X               | B30                   | Cisp              | 0.6                        | 10.14                         | 2                     |
| WT                   | B30                   | Cisp              | 0.6                        | 19.32                         | 1                     |
| C3069X               | B30                   | Cisp              | 1                          | 6.59                          | 1                     |
| C3069X               | B30                   | Cisp              | 1                          | 6.57                          | 2                     |
| WT                   | B30                   | Cisp              | 1                          | 8.93                          | 1                     |
| C3069X               | B30                   | Cisp              | 1.2                        | 6.83                          | 1                     |
| C3069X               | B30                   | Cisp              | 1.2                        | 7.71                          | 2                     |

| Variant <sup>a</sup> | Batch ID <sup>b</sup> | Drug <sup>c</sup> | Concentration <sup>d</sup> | Percent Survived <sup>e</sup> | Clone ID <sup>f</sup> |
|----------------------|-----------------------|-------------------|----------------------------|-------------------------------|-----------------------|
| WT                   | B30                   | Cisp              | 1.2                        | 6.99                          | 1                     |
| C3069X               | B30                   | Cisp              | 1.5                        | 6.83                          | 1                     |
| C3069X               | B30                   | Cisp              | 1.5                        | 6.86                          | 2                     |
| WT                   | B30                   | Cisp              | 1.5                        | 5.81                          | 1                     |
| C3069X               | B30                   | MMS               | 5                          | 39.53                         | 1                     |
| C3069X               | B30                   | MMS               | 5                          | 31.49                         | 2                     |
| WT                   | B30                   | MMS               | 5                          | 87.49                         | 1                     |
| C3069X               | B30                   | MMS               | 10                         | 11.52                         | 1                     |
| C3069X               | B30                   | MMS               | 10                         | 6.19                          | 2                     |
| WT                   | B30                   | MMS               | 10                         | 77.98                         | 1                     |
| C3069X               | B30                   | MMS               | 15                         | 4.32                          | 1                     |
| C3069X               | B30                   | MMS               | 15                         | 3.77                          | 2                     |
| WT                   | B30                   | MMS               | 15                         | 36.55                         | 1                     |
| C3069X               | B30                   | MMS               | 20                         | 3.80                          | 1                     |
| C3069X               | B30                   | MMS               | 20                         | 1.08                          | 2                     |
| WT                   | B30                   | MMS               | 20                         | 30.49                         | 1                     |
| C3069X               | B30                   | MMS               | 30                         | 1.31                          | 1                     |
| C3069X               | B30                   | MMS               | 30                         | 1.00                          | 2                     |
| WT                   | B30                   | MMS               | 30                         | 5.15                          | 1                     |
| C3069X               | B30                   | MMS               | 40                         | 1.18                          | 1                     |
| C3069X               | B30                   | MMS               | 40                         | 1.00                          | 2                     |
| WT                   | B30                   | MMS               | 40                         | 2.28                          | 1                     |
| C3069X               | B30                   | Parp              | 0.01                       | 31.84                         | 1                     |
| C3069X               | B30                   | Parp              | 0.01                       | 13.18                         | 2                     |
| WT                   | B30                   | Parp              | 0.01                       | 91.98                         | 1                     |
| C3069X               | B30                   | Parp              | 0.1                        | 8.09                          | 1                     |
| C3069X               | B30                   | Parp              | 0.1                        | 3.32                          | 2                     |
| WT                   | B30                   | Parp              | 0.1                        | 67.25                         | 1                     |
| C3069X               | B30                   | Parp              | 1                          | 3.08                          | 1                     |
| C3069X               | B30                   | Parp              | 1                          | 3.88                          | 2                     |
| WT                   | B30                   | Parp              | 1                          | 37.35                         | 1                     |
| C3069X               | B30                   | Parp              | 10                         | 2.82                          | 1                     |
| C3069X               | B30                   | Parp              | 10                         | 4.98                          | 2                     |
| WT                   | B30                   | Parp              | 10                         | 3.11                          | 1                     |
| C3069X               | B30                   | IR                | 50                         | 91.30                         | 1                     |
| C3069X               | B30                   | IR                | 50                         | 75.06                         | 2                     |
| WT                   | B30                   | IR                | 50                         | 100.00                        | 1                     |
| C3069X               | B30                   | IR                | 100                        | 76.65                         | 1                     |
| C3069X               | B30                   | IR                | 100                        | 57.52                         | 2                     |
| WT                   | B30                   | IR                | 100                        | 97.96                         | 1                     |

| Variant <sup>a</sup> | Batch ID <sup>b</sup> | Drug <sup>c</sup> | Concentration <sup>d</sup> | Percent Survived <sup>e</sup> | Clone ID <sup>f</sup> |
|----------------------|-----------------------|-------------------|----------------------------|-------------------------------|-----------------------|
| C3069X               | B30                   | IR                | 200                        | 44.28                         | 1                     |
| C3069X               | B30                   | IR                | 200                        | 31.50                         | 2                     |
| WT                   | B30                   | IR                | 200                        | 67.13                         | 1                     |
| C3069X               | B30                   | IR                | 400                        | 24.96                         | 1                     |
| C3069X               | B30                   | IR                | 400                        | 19.21                         | 2                     |
| WT                   | B30                   | IR                | 400                        | 51.54                         | 1                     |
| C3069X               | B30                   | IR                | 600                        | 19.81                         | 1                     |
| C3069X               | B30                   | IR                | 600                        | 17.78                         | 2                     |
| WT                   | B30                   | IR                | 600                        | 17.49                         | 1                     |
| R2336P               | B31                   | Camp              | 2.5                        | 76.49                         | 1                     |
| R2336P               | B31                   | Camp              | 2.5                        | 73.16                         | 2                     |
| WT                   | B31                   | Camp              | 2.5                        | 82.34                         | 1                     |
| R2336P               | B31                   | Camp              | 5                          | 60.07                         | 1                     |
| R2336P               | B31                   | Camp              | 5                          | 70.83                         | 2                     |
| WT                   | B31                   | Camp              | 5                          | 87.74                         | 1                     |
| R2336P               | B31                   | Camp              | 25                         | 12.37                         | 1                     |
| R2336P               | B31                   | Camp              | 25                         | 43.64                         | 2                     |
| WT                   | B31                   | Camp              | 25                         | 63.21                         | 1                     |
| R2336P               | B31                   | Camp              | 50                         | 9.45                          | 1                     |
| R2336P               | B31                   | Camp              | 50                         | 33.26                         | 2                     |
| WT                   | B31                   | Camp              | 50                         | 61.27                         | 1                     |
| R2336P               | B31                   | Camp              | 100                        | 5.40                          | 1                     |
| R2336P               | B31                   | Camp              | 100                        | 4.99                          | 2                     |
| WT                   | B31                   | Camp              | 100                        | 12.37                         | 1                     |
| R2336P               | B31                   | Camp              | 200                        | 3.60                          | 1                     |
| R2336P               | B31                   | Camp              | 200                        | 1.00                          | 2                     |
| WT                   | B31                   | Camp              | 200                        | 1.83                          | 1                     |
| R2336P               | B31                   | MMC               | 5                          | 24.48                         | 1                     |
| R2336P               | B31                   | MMC               | 5                          | 75.72                         | 2                     |
| WT                   | B31                   | MMC               | 5                          | 73.23                         | 1                     |
| R2336P               | B31                   | MMC               | 10                         | 9.64                          | 1                     |
| R2336P               | B31                   | MMC               | 10                         | 57.19                         | 2                     |
| WT                   | B31                   | MMC               | 10                         | 68.09                         | 1                     |
| R2336P               | B31                   | MMC               | 20                         | 5.12                          | 1                     |
| R2336P               | B31                   | MMC               | 20                         | 39.53                         | 2                     |
| WT                   | B31                   | MMC               | 20                         | 50.82                         | 1                     |
| R2336P               | B31                   | MMC               | 40                         | 3.91                          | 1                     |
| R2336P               | B31                   | MMC               | 40                         | 13.58                         | 2                     |
| WT                   | B31                   | MMC               | 40                         | 25.28                         | 1                     |
| R2336P               | B31                   | MMC               | 60                         | 3.91                          | 1                     |

| Variant <sup>a</sup> | Batch ID <sup>b</sup> | Drug <sup>c</sup> | Concentration <sup>d</sup> | Percent Survived <sup>e</sup> | Clone ID <sup>f</sup> |
|----------------------|-----------------------|-------------------|----------------------------|-------------------------------|-----------------------|
| R2336P               | B31                   | MMC               | 60                         | 4.89                          | 2                     |
| WT                   | B31                   | MMC               | 60                         | 11.51                         | 1                     |
| R2336P               | B31                   | MMC               | 80                         | 3.39                          | 1                     |
| R2336P               | B31                   | MMC               | 80                         | 1.00                          | 2                     |
| WT                   | B31                   | MMC               | 80                         | 4.42                          | 1                     |
| R2336P               | B31                   | Cisp              | 0.2                        | 8.65                          | 1                     |
| R2336P               | B31                   | Cisp              | 0.2                        | 46.73                         | 2                     |
| WT                   | B31                   | Cisp              | 0.2                        | 73.37                         | 1                     |
| R2336P               | B31                   | Cisp              | 0.4                        | 4.66                          | 1                     |
| R2336P               | B31                   | Cisp              | 0.4                        | 21.21                         | 2                     |
| WT                   | B31                   | Cisp              | 0.4                        | 48.08                         | 1                     |
| R2336P               | B31                   | Cisp              | 0.6                        | 5.32                          | 1                     |
| R2336P               | B31                   | Cisp              | 0.6                        | 12.95                         | 2                     |
| WT                   | B31                   | Cisp              | 0.6                        | 26.74                         | 1                     |
| R2336P               | B31                   | Cisp              | 1                          | 4.88                          | 1                     |
| R2336P               | B31                   | Cisp              | 1                          | 2.65                          | 2                     |
| WT                   | B31                   | Cisp              | 1                          | 11.10                         | 1                     |
| R2336P               | B31                   | Cisp              | 1.2                        | 4.99                          | 1                     |
| R2336P               | B31                   | Cisp              | 1.2                        | 1.79                          | 2                     |
| WT                   | B31                   | Cisp              | 1.2                        | 6.40                          | 1                     |
| R2336P               | B31                   | Cisp              | 1.5                        | 3.66                          | 1                     |
| R2336P               | B31                   | Cisp              | 1.5                        | 1.00                          | 2                     |
| WT                   | B31                   | Cisp              | 1.5                        | 3.78                          | 1                     |
| R2336P               | B31                   | MMS               | 5                          | 42.33                         | 1                     |
| R2336P               | B31                   | MMS               | 5                          | 79.43                         | 2                     |
| WT                   | B31                   | MMS               | 5                          | 88.55                         | 1                     |
| R2336P               | B31                   | MMS               | 10                         | 11.99                         | 1                     |
| R2336P               | B31                   | MMS               | 10                         | 59.13                         | 2                     |
| WT                   | B31                   | MMS               | 10                         | 74.33                         | 1                     |
| R2336P               | B31                   | MMS               | 15                         | 8.10                          | 1                     |
| R2336P               | B31                   | MMS               | 15                         | 54.38                         | 2                     |
| WT                   | B31                   | MMS               | 15                         | 62.83                         | 1                     |
| R2336P               | B31                   | MMS               | 20                         | 2.81                          | 1                     |
| R2336P               | B31                   | MMS               | 20                         | 18.13                         | 2                     |
| WT                   | B31                   | MMS               | 20                         | 45.53                         | 1                     |
| R2336P               | B31                   | MMS               | 30                         | 2.27                          | 1                     |
| R2336P               | B31                   | MMS               | 30                         | 2.04                          | 2                     |
| WT                   | B31                   | MMS               | 30                         | 7.11                          | 1                     |
| R2336P               | B31                   | MMS               | 40                         | 1.73                          | 1                     |
| R2336P               | B31                   | MMS               | 40                         | 1.00                          | 2                     |

| Variant <sup>a</sup> | Batch ID <sup>b</sup> | Drug <sup>c</sup> | Concentration <sup>d</sup> | Percent Survived <sup>e</sup> | Clone ID <sup>f</sup> |
|----------------------|-----------------------|-------------------|----------------------------|-------------------------------|-----------------------|
| WT                   | B31                   | MMS               | 40                         | 1.83                          | 1                     |
| R2336P               | B31                   | Parp              | 0.01                       | 24.61                         | 1                     |
| R2336P               | B31                   | Parp              | 0.01                       | 71.43                         | 2                     |
| WT                   | B31                   | Parp              | 0.01                       | 95.72                         | 1                     |
| R2336P               | B31                   | Parp              | 0.1                        | 11.02                         | 1                     |
| R2336P               | B31                   | Parp              | 0.1                        | 56.25                         | 2                     |
| WT                   | B31                   | Parp              | 0.1                        | 97.06                         | 1                     |
| R2336P               | B31                   | Parp              | 1                          | 8.24                          | 1                     |
| R2336P               | B31                   | Parp              | 1                          | 17.08                         | 2                     |
| WT                   | B31                   | Parp              | 1                          | 71.78                         | 1                     |
| R2336P               | B31                   | Parp              | 10                         | 5.77                          | 1                     |
| R2336P               | B31                   | Parp              | 10                         | 4.06                          | 2                     |
| WT                   | B31                   | Parp              | 10                         | 4.44                          | 1                     |
| R2336P               | B31                   | IR                | 50                         | 68.15                         | 1                     |
| R2336P               | B31                   | IR                | 50                         | 92.28                         | 2                     |
| WT                   | B31                   | IR                | 50                         | 96.52                         | 1                     |
| R2336P               | B31                   | IR                | 100                        | 49.70                         | 1                     |
| R2336P               | B31                   | IR                | 100                        | 87.88                         | 2                     |
| WT                   | B31                   | IR                | 100                        | 83.74                         | 1                     |
| R2336P               | B31                   | IR                | 200                        | 28.95                         | 1                     |
| R2336P               | B31                   | IR                | 200                        | 63.59                         | 2                     |
| WT                   | B31                   | IR                | 200                        | 72.86                         | 1                     |
| R2336P               | B31                   | IR                | 400                        | 13.03                         | 1                     |
| R2336P               | B31                   | IR                | 400                        | 32.64                         | 2                     |
| WT                   | B31                   | IR                | 400                        | 49.26                         | 1                     |
| R2336P               | B31                   | IR                | 600                        | 9.29                          | 1                     |
| R2336P               | B31                   | IR                | 600                        | 22.10                         | 2                     |
| WT                   | B31                   | IR                | 600                        | 37.80                         | 1                     |
| K2411T               | B32                   | Camp              | 2.5                        | 92.00                         | 1                     |
| K2411T               | B32                   | Camp              | 2.5                        | 84.00                         | 2                     |
| WT                   | B32                   | Camp              | 2.5                        | 74.00                         | 1                     |
| K2411T               | B32                   | Camp              | 5                          | 95.00                         | 1                     |
| K2411T               | B32                   | Camp              | 5                          | 89.00                         | 2                     |
| WT                   | B32                   | Camp              | 5                          | 75.00                         | 1                     |
| K2411T               | B32                   | Camp              | 25                         | 55.00                         | 1                     |
| K2411T               | B32                   | Camp              | 25                         | 63.00                         | 2                     |
| WT                   | B32                   | Camp              | 25                         | 60.00                         | 1                     |
| K2411T               | B32                   | Camp              | 50                         | 22.00                         | 1                     |
| K2411T               | B32                   | Camp              | 50                         | 29.00                         | 2                     |
| WT                   | B32                   | Camp              | 50                         | 36.00                         | 1                     |

| Variant <sup>a</sup> | Batch ID <sup>b</sup> | Drug <sup>c</sup> | Concentration <sup>d</sup> | Percent Survived <sup>e</sup> | Clone ID <sup>f</sup> |
|----------------------|-----------------------|-------------------|----------------------------|-------------------------------|-----------------------|
| K2411T               | B32                   | Camp              | 100                        | 3.00                          | 1                     |
| K2411T               | B32                   | Camp              | 100                        | 4.00                          | 2                     |
| WT                   | B32                   | Camp              | 100                        | 9.00                          | 1                     |
| K2411T               | B32                   | Camp              | 200                        | 2.00                          | 1                     |
| K2411T               | B32                   | Camp              | 200                        | 1.00                          | 2                     |
| WT                   | B32                   | Camp              | 200                        | 3.00                          | 1                     |
| K2411T               | B32                   | MMC               | 5                          | 100.00                        | 1                     |
| K2411T               | B32                   | MMC               | 5                          | 100.00                        | 2                     |
| WT                   | B32                   | MMC               | 5                          | 100.00                        | 1                     |
| K2411T               | B32                   | MMC               | 10                         | 100.00                        | 1                     |
| K2411T               | B32                   | MMC               | 10                         | 97.00                         | 2                     |
| WT                   | B32                   | MMC               | 10                         | 88.00                         | 1                     |
| K2411T               | B32                   | MMC               | 20                         | 100.00                        | 1                     |
| K2411T               | B32                   | MMC               | 20                         | 100.00                        | 2                     |
| WT                   | B32                   | MMC               | 20                         | 92.00                         | 1                     |
| K2411T               | B32                   | MMC               | 40                         | 76.00                         | 1                     |
| K2411T               | B32                   | MMC               | 40                         | 55.00                         | 2                     |
| WT                   | B32                   | MMC               | 40                         | 53.00                         | 1                     |
| K2411T               | B32                   | MMC               | 60                         | 30.00                         | 1                     |
| K2411T               | B32                   | MMC               | 60                         | 25.00                         | 2                     |
| WT                   | B32                   | MMC               | 60                         | 28.00                         | 1                     |
| K2411T               | B32                   | MMC               | 80                         | 15.00                         | 1                     |
| K2411T               | B32                   | MMC               | 80                         | 15.00                         | 2                     |
| WT                   | B32                   | MMC               | 80                         | 15.00                         | 1                     |
| K2411T               | B32                   | Cisp              | 0.2                        | 49.00                         | 1                     |
| K2411T               | B32                   | Cisp              | 0.2                        | 46.00                         | 2                     |
| WT                   | B32                   | Cisp              | 0.2                        | 52.00                         | 1                     |
| K2411T               | B32                   | Cisp              | 0.4                        | 22.00                         | 1                     |
| K2411T               | B32                   | Cisp              | 0.4                        | 21.00                         | 2                     |
| WT                   | B32                   | Cisp              | 0.4                        | 32.00                         | 1                     |
| K2411T               | B32                   | Cisp              | 0.6                        | 12.00                         | 1                     |
| K2411T               | B32                   | Cisp              | 0.6                        | 11.00                         | 2                     |
| WT                   | B32                   | Cisp              | 0.6                        | 18.00                         | 1                     |
| K2411T               | B32                   | Cisp              | 1                          | 8.00                          | 1                     |
| K2411T               | B32                   | Cisp              | 1                          | 6.00                          | 2                     |
| WT                   | B32                   | Cisp              | 1                          | 7.00                          | 1                     |
| K2411T               | B32                   | Cisp              | 1.2                        | 6.00                          | 1                     |
| K2411T               | B32                   | Cisp              | 1.2                        | 4.00                          | 2                     |
| WT                   | B32                   | Cisp              | 1.2                        | 7.00                          | 1                     |
| K2411T               | B32                   | Cisp              | 1.5                        | 5.00                          | 1                     |



| Variant <sup>a</sup> | Batch ID <sup>b</sup> | Drug <sup>c</sup> | Concentration <sup>d</sup> | Percent Survived <sup>e</sup> | Clone ID <sup>f</sup> |
|----------------------|-----------------------|-------------------|----------------------------|-------------------------------|-----------------------|
| K2411T               | B32                   | Cisp              | 1.5                        | 3.00                          | 2                     |
| WT                   | B32                   | Cisp              | 1.5                        | 7.00                          | 1                     |
| K2411T               | B32                   | MMS               | 5                          | 100.00                        | 1                     |
| K2411T               | B32                   | MMS               | 5                          | 74.00                         | 2                     |
| WT                   | B32                   | MMS               | 5                          | 83.00                         | 1                     |
| K2411T               | B32                   | MMS               | 10                         | 100.00                        | 1                     |
| K2411T               | B32                   | MMS               | 10                         | 65.00                         | 2                     |
| WT                   | B32                   | MMS               | 10                         | 82.00                         | 1                     |
| K2411T               | B32                   | MMS               | 15                         | 89.00                         | 1                     |
| K2411T               | B32                   | MMS               | 15                         | 63.00                         | 2                     |
| WT                   | B32                   | MMS               | 15                         | 73.00                         | 1                     |
| K2411T               | B32                   | MMS               | 20                         | 52.00                         | 1                     |
| K2411T               | B32                   | MMS               | 20                         | 40.00                         | 2                     |
| WT                   | B32                   | MMS               | 20                         | 52.00                         | 1                     |
| K2411T               | B32                   | MMS               | 30                         | 5.00                          | 1                     |
| K2411T               | B32                   | MMS               | 30                         | 11.00                         | 2                     |
| WT                   | B32                   | MMS               | 30                         | 20.00                         | 1                     |
| K2411T               | B32                   | MMS               | 40                         | 1.00                          | 1                     |
| K2411T               | B32                   | MMS               | 40                         | 2.00                          | 2                     |
| WT                   | B32                   | MMS               | 40                         | 4.00                          | 1                     |
| K2411T               | B32                   | Parp              | 0.01                       | 6.00                          | 1                     |
| K2411T               | B32                   | Parp              | 0.01                       | 97.00                         | 2                     |
| WT                   | B32                   | Parp              | 0.01                       | 100.00                        | 1                     |
| K2411T               | B32                   | Parp              | 0.1                        | 80.00                         | 1                     |
| K2411T               | B32                   | Parp              | 0.1                        | 89.00                         | 2                     |
| WT                   | B32                   | Parp              | 0.1                        | 97.00                         | 1                     |
| K2411T               | B32                   | Parp              | 1                          | 73.00                         | 1                     |
| K2411T               | B32                   | Parp              | 1                          | 84.00                         | 2                     |
| WT                   | B32                   | Parp              | 1                          | 86.00                         | 1                     |
| K2411T               | B32                   | Parp              | 10                         | 36.00                         | 1                     |
| K2411T               | B32                   | Parp              | 10                         | 36.00                         | 2                     |
| WT                   | B32                   | Parp              | 10                         | 38.00                         | 1                     |
| K2411T               | B32                   | IR                | 50                         | 76.00                         | 1                     |
| K2411T               | B32                   | IR                | 50                         | 76.00                         | 2                     |
| WT                   | B32                   | IR                | 50                         | 68.00                         | 1                     |
| K2411T               | B32                   | IR                | 100                        | 63.00                         | 1                     |
| K2411T               | B32                   | IR                | 100                        | 64.00                         | 2                     |
| WT                   | B32                   | IR                | 100                        | 64.00                         | 1                     |
| K2411T               | B32                   | IR                | 200                        | 33.00                         | 1                     |
| K2411T               | B32                   | IR                | 200                        | 38.00                         | 2                     |

| Variant <sup>a</sup> | Batch ID <sup>b</sup> | Drug <sup>c</sup> | Concentration <sup>d</sup> | Percent Survived <sup>e</sup> | Clone ID <sup>f</sup> |
|----------------------|-----------------------|-------------------|----------------------------|-------------------------------|-----------------------|
| WT                   | B32                   | IR                | 200                        | 38.00                         | 1                     |
| K2411T               | B32                   | IR                | 400                        | 18.00                         | 1                     |
| K2411T               | B32                   | IR                | 400                        | 13.00                         | 2                     |
| WT                   | B32                   | IR                | 400                        | 21.00                         | 1                     |
| K2411T               | B32                   | IR                | 600                        | 11.00                         | 1                     |
| K2411T               | B32                   | IR                | 600                        | 11.00                         | 2                     |
| WT                   | B32                   | IR                | 600                        | 11.00                         | 1                     |
| N1880K               | B33                   | Camp              | 2.5                        | 71.00                         | 1                     |
| N1880K               | B33                   | Camp              | 2.5                        | 63.00                         | 2                     |
| WT                   | B33                   | Camp              | 2.5                        | 74.00                         | 1                     |
| N1880K               | B33                   | Camp              | 5                          | 67.00                         | 1                     |
| N1880K               | B33                   | Camp              | 5                          | 61.00                         | 2                     |
| WT                   | B33                   | Camp              | 5                          | 75.00                         | 1                     |
| N1880K               | B33                   | Camp              | 25                         | 59.00                         | 1                     |
| N1880K               | B33                   | Camp              | 25                         | 45.00                         | 2                     |
| WT                   | B33                   | Camp              | 25                         | 60.00                         | 1                     |
| N1880K               | B33                   | Camp              | 50                         | 28.00                         | 1                     |
| N1880K               | B33                   | Camp              | 50                         | 27.00                         | 2                     |
| WT                   | B33                   | Camp              | 50                         | 36.00                         | 1                     |
| N1880K               | B33                   | Camp              | 100                        | 5.00                          | 1                     |
| N1880K               | B33                   | Camp              | 100                        | 7.00                          | 2                     |
| WT                   | B33                   | Camp              | 100                        | 9.00                          | 1                     |
| N1880K               | B33                   | Camp              | 200                        | 4.00                          | 1                     |
| N1880K               | B33                   | Camp              | 200                        | 4.00                          | 2                     |
| WT                   | B33                   | Camp              | 200                        | 3.00                          | 1                     |
| N1880K               | B33                   | MMC               | 5                          | 100.00                        | 1                     |
| N1880K               | B33                   | MMC               | 5                          | 94.00                         | 2                     |
| WT                   | B33                   | MMC               | 5                          | 100.00                        | 1                     |
| N1880K               | B33                   | MMC               | 10                         | 100.00                        | 1                     |
| N1880K               | B33                   | MMC               | 10                         | 88.00                         | 2                     |
| WT                   | B33                   | MMC               | 10                         | 88.00                         | 1                     |
| N1880K               | B33                   | MMC               | 20                         | 100.00                        | 1                     |
| N1880K               | B33                   | MMC               | 20                         | 91.00                         | 2                     |
| WT                   | B33                   | MMC               | 20                         | 92.00                         | 1                     |
| N1880K               | B33                   | MMC               | 40                         | 96.00                         | 1                     |
| N1880K               | B33                   | MMC               | 40                         | 65.00                         | 2                     |
| WT                   | B33                   | MMC               | 40                         | 53.00                         | 1                     |
| N1880K               | B33                   | MMC               | 60                         | 66.00                         | 1                     |
| N1880K               | B33                   | MMC               | 60                         | 35.00                         | 2                     |
| WT                   | B33                   | MMC               | 60                         | 28.00                         | 1                     |

| Variant <sup>a</sup> | Batch ID <sup>b</sup> | Drug <sup>c</sup> | Concentration <sup>d</sup> | Percent Survived <sup>e</sup> | Clone ID <sup>f</sup> |
|----------------------|-----------------------|-------------------|----------------------------|-------------------------------|-----------------------|
| N1880K               | B33                   | MMC               | 80                         | 31.00                         | 1                     |
| N1880K               | B33                   | MMC               | 80                         | 18.00                         | 2                     |
| WT                   | B33                   | MMC               | 80                         | 15.00                         | 1                     |
| N1880K               | B33                   | Cisp              | 0.2                        | 50.00                         | 1                     |
| N1880K               | B33                   | Cisp              | 0.2                        | 51.00                         | 2                     |
| WT                   | B33                   | Cisp              | 0.2                        | 52.00                         | 1                     |
| N1880K               | B33                   | Cisp              | 0.4                        | 24.00                         | 1                     |
| N1880K               | B33                   | Cisp              | 0.4                        | 33.00                         | 2                     |
| WT                   | B33                   | Cisp              | 0.4                        | 32.00                         | 1                     |
| N1880K               | B33                   | Cisp              | 0.6                        | 17.00                         | 1                     |
| N1880K               | B33                   | Cisp              | 0.6                        | 25.00                         | 2                     |
| WT                   | B33                   | Cisp              | 0.6                        | 18.00                         | 1                     |
| N1880K               | B33                   | Cisp              | 1                          | 9.00                          | 1                     |
| N1880K               | B33                   | Cisp              | 1                          | 17.00                         | 2                     |
| WT                   | B33                   | Cisp              | 1                          | 7.00                          | 1                     |
| N1880K               | B33                   | Cisp              | 1.2                        | 9.00                          | 1                     |
| N1880K               | B33                   | Cisp              | 1.2                        | 13.00                         | 2                     |
| WT                   | B33                   | Cisp              | 1.2                        | 7.00                          | 1                     |
| N1880K               | B33                   | Cisp              | 1.5                        | 8.00                          | 1                     |
| N1880K               | B33                   | Cisp              | 1.5                        | 9.00                          | 2                     |
| WT                   | B33                   | Cisp              | 1.5                        | 7.00                          | 1                     |
| N1880K               | B33                   | MMS               | 5                          | 84.00                         | 1                     |
| N1880K               | B33                   | MMS               | 5                          | 85.00                         | 2                     |
| WT                   | B33                   | MMS               | 5                          | 83.00                         | 1                     |
| N1880K               | B33                   | MMS               | 10                         | 99.00                         | 1                     |
| N1880K               | B33                   | MMS               | 10                         | 87.00                         | 2                     |
| WT                   | B33                   | MMS               | 10                         | 82.00                         | 1                     |
| N1880K               | B33                   | MMS               | 15                         | 76.00                         | 1                     |
| N1880K               | B33                   | MMS               | 15                         | 58.00                         | 2                     |
| WT                   | B33                   | MMS               | 15                         | 73.00                         | 1                     |
| N1880K               | B33                   | MMS               | 20                         | 48.00                         | 1                     |
| N1880K               | B33                   | MMS               | 20                         | 34.00                         | 2                     |
| WT                   | B33                   | MMS               | 20                         | 52.00                         | 1                     |
| N1880K               | B33                   | MMS               | 30                         | 10.00                         | 1                     |
| N1880K               | B33                   | MMS               | 30                         | 6.00                          | 2                     |
| WT                   | B33                   | MMS               | 30                         | 20.00                         | 1                     |
| N1880K               | B33                   | MMS               | 40                         | 4.00                          | 1                     |
| N1880K               | B33                   | MMS               | 40                         | 4.00                          | 2                     |
| WT                   | B33                   | MMS               | 40                         | 4.00                          | 1                     |
| N1880K               | B33                   | Parp              | 0.01                       | 100.00                        | 1                     |

| Variant <sup>a</sup> | Batch ID <sup>b</sup> | Drug <sup>c</sup> | Concentration <sup>d</sup> | Percent Survived <sup>e</sup> | Clone ID <sup>f</sup> |
|----------------------|-----------------------|-------------------|----------------------------|-------------------------------|-----------------------|
| N1880K               | B33                   | Parp              | 0.01                       | 96.00                         | 2                     |
| WT                   | B33                   | Parp              | 0.01                       | 99.00                         | 1                     |
| N1880K               | B33                   | Parp              | 0.1                        | 93.00                         | 1                     |
| N1880K               | B33                   | Parp              | 0.1                        | 76.00                         | 2                     |
| WT                   | B33                   | Parp              | 0.1                        | 99.00                         | 1                     |
| N1880K               | B33                   | Parp              | 1                          | 91.00                         | 1                     |
| N1880K               | B33                   | Parp              | 1                          | 82.00                         | 2                     |
| WT                   | B33                   | Parp              | 1                          | 85.00                         | 1                     |
| N1880K               | B33                   | Parp              | 10                         | 21.00                         | 1                     |
| N1880K               | B33                   | Parp              | 10                         | 5.00                          | 2                     |
| WT                   | B33                   | Parp              | 10                         | 16.00                         | 1                     |
| N1880K               | B33                   | IR                | 50                         | 76.00                         | 1                     |
| N1880K               | B33                   | IR                | 50                         | 71.00                         | 2                     |
| WT                   | B33                   | IR                | 50                         | 68.00                         | 1                     |
| N1880K               | B33                   | IR                | 100                        | 61.00                         | 1                     |
| N1880K               | B33                   | IR                | 100                        | 71.00                         | 2                     |
| WT                   | B33                   | IR                | 100                        | 64.00                         | 1                     |
| N1880K               | B33                   | IR                | 200                        | 32.00                         | 1                     |
| N1880K               | B33                   | IR                | 200                        | 38.00                         | 2                     |
| WT                   | B33                   | IR                | 200                        | 38.00                         | 1                     |
| N1880K               | B33                   | IR                | 400                        | 14.00                         | 1                     |
| N1880K               | B33                   | IR                | 400                        | 17.00                         | 2                     |
| WT                   | B33                   | IR                | 400                        | 21.00                         | 1                     |
| N1880K               | B33                   | IR                | 600                        | 10.00                         | 1                     |
| N1880K               | B33                   | IR                | 600                        | 12.00                         | 2                     |
| WT                   | B33                   | IR                | 600                        | 11.00                         | 1                     |
| R2488K               | B34                   | Camp              | 2.5                        | 83.00                         | 1                     |
| R2488K               | B34                   | Camp              | 2.5                        | 81.00                         | 2                     |
| WT                   | B34                   | Camp              | 2.5                        | 100.00                        | 1                     |
| R2488K               | B34                   | Camp              | 5                          | 97.00                         | 1                     |
| R2488K               | B34                   | Camp              | 5                          | 92.00                         | 2                     |
| WT                   | B34                   | Camp              | 5                          | 94.00                         | 1                     |
| R2488K               | B34                   | Camp              | 25                         | 93.00                         | 1                     |
| R2488K               | B34                   | Camp              | 25                         | 63.00                         | 2                     |
| WT                   | B34                   | Camp              | 25                         | 80.00                         | 1                     |
| R2488K               | B34                   | Camp              | 50                         | 44.00                         | 1                     |
| R2488K               | B34                   | Camp              | 50                         | 30.00                         | 2                     |
| WT                   | B34                   | Camp              | 50                         | 59.00                         | 1                     |
| R2488K               | B34                   | Camp              | 100                        | 13.00                         | 1                     |
| R2488K               | B34                   | Camp              | 100                        | 8.00                          | 2                     |

| Variant <sup>a</sup> | Batch ID <sup>b</sup> | Drug <sup>c</sup> | Concentration <sup>d</sup> | Percent Survived <sup>e</sup> | Clone ID <sup>f</sup> |
|----------------------|-----------------------|-------------------|----------------------------|-------------------------------|-----------------------|
| WT                   | B34                   | Camp              | 100                        | 19.00                         | 1                     |
| R2488K               | B34                   | Camp              | 200                        | 8.00                          | 1                     |
| R2488K               | B34                   | Camp              | 200                        | 4.00                          | 2                     |
| WT                   | B34                   | Camp              | 200                        | 9.00                          | 1                     |
| R2488K               | B34                   | MMC               | 5                          | 81.00                         | 1                     |
| R2488K               | B34                   | MMC               | 5                          | 85.00                         | 2                     |
| WT                   | B34                   | MMC               | 5                          | 92.00                         | 1                     |
| R2488K               | B34                   | MMC               | 10                         | 79.00                         | 1                     |
| R2488K               | B34                   | MMC               | 10                         | 90.00                         | 2                     |
| WT                   | B34                   | MMC               | 10                         | 88.00                         | 1                     |
| R2488K               | B34                   | MMC               | 20                         | 67.00                         | 1                     |
| R2488K               | B34                   | MMC               | 20                         | 78.00                         | 2                     |
| WT                   | B34                   | MMC               | 20                         | 71.00                         | 1                     |
| R2488K               | B34                   | MMC               | 40                         | 52.00                         | 1                     |
| R2488K               | B34                   | MMC               | 40                         | 43.00                         | 2                     |
| WT                   | B34                   | MMC               | 40                         | 55.00                         | 1                     |
| R2488K               | B34                   | MMC               | 60                         | 36.00                         | 1                     |
| R2488K               | B34                   | MMC               | 60                         | 28.00                         | 2                     |
| WT                   | B34                   | MMC               | 60                         | 45.00                         | 1                     |
| R2488K               | B34                   | MMC               | 80                         | 28.00                         | 1                     |
| R2488K               | B34                   | MMC               | 80                         | 17.00                         | 2                     |
| WT                   | B34                   | MMC               | 80                         | 41.00                         | 1                     |
| R2488K               | B34                   | Cisp              | 0.2                        | 61.00                         | 1                     |
| R2488K               | B34                   | Cisp              | 0.2                        | 61.00                         | 2                     |
| WT                   | B34                   | Cisp              | 0.2                        | 65.00                         | 1                     |
| R2488K               | B34                   | Cisp              | 0.4                        | 28.00                         | 1                     |
| R2488K               | B34                   | Cisp              | 0.4                        | 27.00                         | 2                     |
| WT                   | B34                   | Cisp              | 0.4                        | 43.00                         | 1                     |
| R2488K               | B34                   | Cisp              | 0.6                        | 9.00                          | 1                     |
| R2488K               | B34                   | Cisp              | 0.6                        | 13.00                         | 2                     |
| WT                   | B34                   | Cisp              | 0.6                        | 23.00                         | 1                     |
| R2488K               | B34                   | Cisp              | 1                          | 5.00                          | 1                     |
| R2488K               | B34                   | Cisp              | 1                          | 5.00                          | 2                     |
| WT                   | B34                   | Cisp              | 1                          | 8.00                          | 1                     |
| R2488K               | B34                   | Cisp              | 1.2                        | 3.00                          | 1                     |
| R2488K               | B34                   | Cisp              | 1.2                        | 5.00                          | 2                     |
| WT                   | B34                   | Cisp              | 1.2                        | 4.00                          | 1                     |
| R2488K               | B34                   | Cisp              | 1.5                        | 2.00                          | 1                     |
| R2488K               | B34                   | Cisp              | 1.5                        | 3.00                          | 2                     |
| WT                   | B34                   | Cisp              | 1.5                        | 3.00                          | 1                     |

| Variant <sup>a</sup> | Batch ID <sup>b</sup> | Drug <sup>c</sup> | Concentration <sup>d</sup> | Percent Survived <sup>e</sup> | Clone ID <sup>f</sup> |
|----------------------|-----------------------|-------------------|----------------------------|-------------------------------|-----------------------|
| R2488K               | B34                   | MMS               | 5                          | 100.00                        | 1                     |
| R2488K               | B34                   | MMS               | 5                          | 100.00                        | 2                     |
| WT                   | B34                   | MMS               | 5                          | 100.00                        | 1                     |
| R2488K               | B34                   | MMS               | 10                         | 81.00                         | 1                     |
| R2488K               | B34                   | MMS               | 10                         | 87.00                         | 2                     |
| WT                   | B34                   | MMS               | 10                         | 100.00                        | 1                     |
| R2488K               | B34                   | MMS               | 15                         | 47.00                         | 1                     |
| R2488K               | B34                   | MMS               | 15                         | 47.00                         | 2                     |
| WT                   | B34                   | MMS               | 15                         | 85.00                         | 1                     |
| R2488K               | B34                   | MMS               | 20                         | 14.00                         | 1                     |
| R2488K               | B34                   | MMS               | 20                         | 19.00                         | 2                     |
| WT                   | B34                   | MMS               | 20                         | 59.00                         | 1                     |
| R2488K               | B34                   | MMS               | 30                         | 1.00                          | 1                     |
| R2488K               | B34                   | MMS               | 30                         | 1.00                          | 2                     |
| WT                   | B34                   | MMS               | 30                         | 24.00                         | 1                     |
| R2488K               | B34                   | MMS               | 40                         | 2.00                          | 1                     |
| R2488K               | B34                   | MMS               | 40                         | 1.00                          | 2                     |
| WT                   | B34                   | MMS               | 40                         | 6.00                          | 1                     |
| R2488K               | B34                   | Parp              | 0.01                       | 70.00                         | 1                     |
| R2488K               | B34                   | Parp              | 0.01                       | 77.00                         | 2                     |
| WT                   | B34                   | Parp              | 0.01                       | 91.00                         | 1                     |
| R2488K               | B34                   | Parp              | 0.1                        | 43.00                         | 1                     |
| R2488K               | B34                   | Parp              | 0.1                        | 49.00                         | 2                     |
| WT                   | B34                   | Parp              | 0.1                        | 70.00                         | 1                     |
| R2488K               | B34                   | Parp              | 1                          | 5.00                          | 1                     |
| R2488K               | B34                   | Parp              | 1                          | 6.00                          | 2                     |
| WT                   | B34                   | Parp              | 1                          | 7.00                          | 1                     |
| R2488K               | B34                   | Parp              | 10                         | 6.00                          | 1                     |
| R2488K               | B34                   | Parp              | 10                         | 7.00                          | 2                     |
| WT                   | B34                   | Parp              | 10                         | 6.00                          | 1                     |
| R2488K               | B34                   | IR                | 50                         | 86.24                         | 1                     |
| R2488K               | B34                   | IR                | 50                         | 78.46                         | 2                     |
| WT                   | B34                   | IR                | 50                         | 100.00                        | 1                     |
| R2488K               | B34                   | IR                | 100                        | 81.02                         | 1                     |
| R2488K               | B34                   | IR                | 100                        | 76.63                         | 2                     |
| WT                   | B34                   | IR                | 100                        | 87.06                         | 1                     |
| R2488K               | B34                   | IR                | 200                        | 53.63                         | 1                     |
| R2488K               | B34                   | IR                | 200                        | 58.00                         | 2                     |
| WT                   | B34                   | IR                | 200                        | 61.99                         | 1                     |
| R2488K               | B34                   | IR                | 400                        | 34.65                         | 1                     |

| Variant <sup>a</sup> | Batch ID <sup>b</sup> | Drug <sup>c</sup> | Concentration <sup>d</sup> | Percent Survived <sup>e</sup> | Clone ID <sup>f</sup> |
|----------------------|-----------------------|-------------------|----------------------------|-------------------------------|-----------------------|
| R2488K               | B34                   | IR                | 400                        | 33.23                         | 2                     |
| WT                   | B34                   | IR                | 400                        | 48.78                         | 1                     |
| R2488K               | B34                   | IR                | 600                        | 21.01                         | 1                     |
| R2488K               | B34                   | IR                | 600                        | 27.60                         | 2                     |
| WT                   | B34                   | IR                | 600                        | 31.94                         | 1                     |
| D2489G               | B35                   | Camp              | 2.5                        | 75.00                         | 1                     |
| D2489G               | B35                   | Camp              | 2.5                        | 92.00                         | 2                     |
| WT                   | B35                   | Camp              | 2.5                        | 100.00                        | 1                     |
| D2489G               | B35                   | Camp              | 5                          | 85.00                         | 1                     |
| D2489G               | B35                   | Camp              | 5                          | 93.00                         | 2                     |
| WT                   | B35                   | Camp              | 5                          | 94.00                         | 1                     |
| D2489G               | B35                   | Camp              | 25                         | 77.00                         | 1                     |
| D2489G               | B35                   | Camp              | 25                         | 65.00                         | 2                     |
| WT                   | B35                   | Camp              | 25                         | 80.00                         | 1                     |
| D2489G               | B35                   | Camp              | 50                         | 33.00                         | 1                     |
| D2489G               | B35                   | Camp              | 50                         | 38.00                         | 2                     |
| WT                   | B35                   | Camp              | 50                         | 59.00                         | 1                     |
| D2489G               | B35                   | Camp              | 100                        | 20.00                         | 1                     |
| D2489G               | B35                   | Camp              | 100                        | 7.00                          | 2                     |
| WT                   | B35                   | Camp              | 100                        | 19.00                         | 1                     |
| D2489G               | B35                   | Camp              | 200                        | 7.00                          | 1                     |
| D2489G               | B35                   | Camp              | 200                        | 2.00                          | 2                     |
| WT                   | B35                   | Camp              | 200                        | 9.00                          | 1                     |
| D2489G               | B35                   | MMC               | 5                          | 94.00                         | 1                     |
| D2489G               | B35                   | MMC               | 5                          | 100.00                        | 2                     |
| WT                   | B35                   | MMC               | 5                          | 92.00                         | 1                     |
| D2489G               | B35                   | MMC               | 10                         | 94.00                         | 1                     |
| D2489G               | B35                   | MMC               | 10                         | 100.00                        | 2                     |
| WT                   | B35                   | MMC               | 10                         | 88.00                         | 1                     |
| D2489G               | B35                   | MMC               | 20                         | 95.00                         | 1                     |
| D2489G               | B35                   | MMC               | 20                         | 92.00                         | 2                     |
| WT                   | B35                   | MMC               | 20                         | 71.00                         | 1                     |
| D2489G               | B35                   | MMC               | 40                         | 60.00                         | 1                     |
| D2489G               | B35                   | MMC               | 40                         | 77.00                         | 2                     |
| WT                   | B35                   | MMC               | 40                         | 55.00                         | 1                     |
| D2489G               | B35                   | MMC               | 60                         | 66.00                         | 1                     |
| D2489G               | B35                   | MMC               | 60                         | 58.00                         | 2                     |
| WT                   | B35                   | MMC               | 60                         | 45.00                         | 1                     |
| D2489G               | B35                   | MMC               | 80                         | 42.00                         | 1                     |
| D2489G               | B35                   | MMC               | 80                         | 34.00                         | 2                     |

| Variant <sup>a</sup> | Batch ID <sup>b</sup> | Drug <sup>c</sup> | Concentration <sup>d</sup> | Percent Survived <sup>e</sup> | Clone ID <sup>f</sup> |
|----------------------|-----------------------|-------------------|----------------------------|-------------------------------|-----------------------|
| WT                   | B35                   | MMC               | 80                         | 41.00                         | 1                     |
| D2489G               | B35                   | Cisp              | 0.2                        | 52.00                         | 1                     |
| D2489G               | B35                   | Cisp              | 0.2                        | 36.00                         | 2                     |
| WT                   | B35                   | Cisp              | 0.2                        | 65.00                         | 1                     |
| D2489G               | B35                   | Cisp              | 0.4                        | 25.00                         | 1                     |
| D2489G               | B35                   | Cisp              | 0.4                        | 17.00                         | 2                     |
| WT                   | B35                   | Cisp              | 0.4                        | 43.00                         | 1                     |
| D2489G               | B35                   | Cisp              | 0.6                        | 13.00                         | 1                     |
| D2489G               | B35                   | Cisp              | 0.6                        | 6.00                          | 2                     |
| WT                   | B35                   | Cisp              | 0.6                        | 23.00                         | 1                     |
| D2489G               | B35                   | Cisp              | 1                          | 5.00                          | 1                     |
| D2489G               | B35                   | Cisp              | 1                          | 3.00                          | 2                     |
| WT                   | B35                   | Cisp              | 1                          | 8.00                          | 1                     |
| D2489G               | B35                   | Cisp              | 1.2                        | 4.00                          | 1                     |
| D2489G               | B35                   | Cisp              | 1.2                        | 2.00                          | 2                     |
| WT                   | B35                   | Cisp              | 1.2                        | 4.00                          | 1                     |
| D2489G               | B35                   | Cisp              | 1.5                        | 3.00                          | 1                     |
| D2489G               | B35                   | Cisp              | 1.5                        | 2.00                          | 2                     |
| WT                   | B35                   | Cisp              | 1.5                        | 3.00                          | 1                     |
| D2489G               | B35                   | MMS               | 5                          | 96.00                         | 1                     |
| D2489G               | B35                   | MMS               | 5                          | 81.00                         | 2                     |
| WT                   | B35                   | MMS               | 5                          | 100.00                        | 1                     |
| D2489G               | B35                   | MMS               | 10                         | 65.00                         | 1                     |
| D2489G               | B35                   | MMS               | 10                         | 59.00                         | 2                     |
| WT                   | B35                   | MMS               | 10                         | 100.00                        | 1                     |
| D2489G               | B35                   | MMS               | 15                         | 44.00                         | 1                     |
| D2489G               | B35                   | MMS               | 15                         | 39.00                         | 2                     |
| WT                   | B35                   | MMS               | 15                         | 85.00                         | 1                     |
| D2489G               | B35                   | MMS               | 20                         | 19.00                         | 1                     |
| D2489G               | B35                   | MMS               | 20                         | 22.00                         | 2                     |
| WT                   | B35                   | MMS               | 20                         | 59.00                         | 1                     |
| D2489G               | B35                   | MMS               | 30                         | 1.00                          | 1                     |
| D2489G               | B35                   | MMS               | 30                         | 1.00                          | 2                     |
| WT                   | B35                   | MMS               | 30                         | 24.00                         | 1                     |
| D2489G               | B35                   | MMS               | 40                         | 1.00                          | 1                     |
| D2489G               | B35                   | MMS               | 40                         | 1.00                          | 2                     |
| WT                   | B35                   | MMS               | 40                         | 6.00                          | 1                     |
| D2489G               | B35                   | Parp              | 0.01                       | 62.00                         | 1                     |
| D2489G               | B35                   | Parp              | 0.01                       | 60.00                         | 2                     |
| WT                   | B35                   | Parp              | 0.01                       | 91.00                         | 1                     |



| Variant <sup>a</sup> | Batch ID <sup>b</sup> | Drug <sup>c</sup> | Concentration <sup>d</sup> | Percent Survived <sup>e</sup> | Clone ID <sup>f</sup> |
|----------------------|-----------------------|-------------------|----------------------------|-------------------------------|-----------------------|
| D2489G               | B35                   | Parp              | 0.1                        | 31.00                         | 1                     |
| D2489G               | B35                   | Parp              | 0.1                        | 25.00                         | 2                     |
| WT                   | B35                   | Parp              | 0.1                        | 66.00                         | 1                     |
| D2489G               | B35                   | Parp              | 1                          | 7.00                          | 1                     |
| D2489G               | B35                   | Parp              | 1                          | 1.00                          | 2                     |
| WT                   | B35                   | Parp              | 1                          | 7.00                          | 1                     |
| D2489G               | B35                   | Parp              | 10                         | 9.00                          | 1                     |
| D2489G               | B35                   | Parp              | 10                         | 1.00                          | 2                     |
| WT                   | B35                   | Parp              | 10                         | 6.00                          | 1                     |
| D2489G               | B35                   | IR                | 50                         | 99.00                         | 1                     |
| D2489G               | B35                   | IR                | 50                         | 100.00                        | 2                     |
| WT                   | B35                   | IR                | 50                         | 100.00                        | 1                     |
| D2489G               | B35                   | IR                | 100                        | 74.00                         | 1                     |
| D2489G               | B35                   | IR                | 100                        | 91.00                         | 2                     |
| WT                   | B35                   | IR                | 100                        | 87.00                         | 1                     |
| D2489G               | B35                   | IR                | 200                        | 60.00                         | 1                     |
| D2489G               | B35                   | IR                | 200                        | 58.00                         | 2                     |
| WT                   | B35                   | IR                | 200                        | 62.00                         | 1                     |
| D2489G               | B35                   | IR                | 400                        | 42.00                         | 1                     |
| D2489G               | B35                   | IR                | 400                        | 35.00                         | 2                     |
| WT                   | B35                   | IR                | 400                        | 49.00                         | 1                     |
| D2489G               | B35                   | IR                | 600                        | 28.00                         | 1                     |
| D2489G               | B35                   | IR                | 600                        | 23.00                         | 2                     |
| WT                   | B35                   | IR                | 600                        | 32.00                         | 1                     |
| F3065L               | B36                   | Camp              | 2.5                        | 74.00                         | 1                     |
| F3065L               | B36                   | Camp              | 2.5                        | 90.00                         | 2                     |
| WT                   | B36                   | Camp              | 2.5                        | 74.00                         | 1                     |
| F3065L               | B36                   | Camp              | 5                          | 80.00                         | 1                     |
| F3065L               | B36                   | Camp              | 5                          | 92.00                         | 2                     |
| WT                   | B36                   | Camp              | 5                          | 75.00                         | 1                     |
| F3065L               | B36                   | Camp              | 25                         | 48.00                         | 1                     |
| F3065L               | B36                   | Camp              | 25                         | 55.00                         | 2                     |
| WT                   | B36                   | Camp              | 25                         | 60.00                         | 1                     |
| F3065L               | B36                   | Camp              | 50                         | 24.00                         | 1                     |
| F3065L               | B36                   | Camp              | 50                         | 17.00                         | 2                     |
| WT                   | B36                   | Camp              | 50                         | 36.00                         | 1                     |
| F3065L               | B36                   | Camp              | 100                        | 8.00                          | 1                     |
| F3065L               | B36                   | Camp              | 100                        | 3.00                          | 2                     |
| WT                   | B36                   | Camp              | 100                        | 9.00                          | 1                     |
| F3065L               | B36                   | Camp              | 200                        | 12.00                         | 1                     |

| Variant <sup>a</sup> | Batch ID <sup>b</sup> | Drug <sup>c</sup> | Concentration <sup>d</sup> | Percent Survived <sup>e</sup> | Clone ID <sup>f</sup> |
|----------------------|-----------------------|-------------------|----------------------------|-------------------------------|-----------------------|
| F3065L               | B36                   | Camp              | 200                        | 2.00                          | 2                     |
| WT                   | B36                   | Camp              | 200                        | 3.00                          | 1                     |
| F3065L               | B36                   | MMC               | 5                          | 100.00                        | 1                     |
| F3065L               | B36                   | MMC               | 5                          | 100.00                        | 2                     |
| WT                   | B36                   | MMC               | 5                          | 100.00                        | 1                     |
| F3065L               | B36                   | MMC               | 10                         | 99.00                         | 1                     |
| F3065L               | B36                   | MMC               | 10                         | 90.00                         | 2                     |
| WT                   | B36                   | MMC               | 10                         | 88.00                         | 1                     |
| F3065L               | B36                   | MMC               | 20                         | 94.00                         | 1                     |
| F3065L               | B36                   | MMC               | 20                         | 79.00                         | 2                     |
| WT                   | B36                   | MMC               | 20                         | 92.00                         | 1                     |
| F3065L               | B36                   | MMC               | 40                         | 70.00                         | 1                     |
| F3065L               | B36                   | MMC               | 40                         | 41.00                         | 2                     |
| WT                   | B36                   | MMC               | 40                         | 53.00                         | 1                     |
| F3065L               | B36                   | MMC               | 60                         | 37.00                         | 1                     |
| F3065L               | B36                   | MMC               | 60                         | 18.00                         | 2                     |
| WT                   | B36                   | MMC               | 60                         | 28.00                         | 1                     |
| F3065L               | B36                   | MMC               | 80                         | 17.00                         | 1                     |
| F3065L               | B36                   | MMC               | 80                         | 7.00                          | 2                     |
| WT                   | B36                   | MMC               | 80                         | 15.00                         | 1                     |
| F3065L               | B36                   | Cisp              | 0.2                        | 43.00                         | 1                     |
| F3065L               | B36                   | Cisp              | 0.2                        | 47.00                         | 2                     |
| WT                   | B36                   | Cisp              | 0.2                        | 52.00                         | 1                     |
| F3065L               | B36                   | Cisp              | 0.4                        | 21.00                         | 1                     |
| F3065L               | B36                   | Cisp              | 0.4                        | 24.00                         | 2                     |
| WT                   | B36                   | Cisp              | 0.4                        | 32.00                         | 1                     |
| F3065L               | B36                   | Cisp              | 0.6                        | 16.00                         | 1                     |
| F3065L               | B36                   | Cisp              | 0.6                        | 14.00                         | 2                     |
| WT                   | B36                   | Cisp              | 0.6                        | 18.00                         | 1                     |
| F3065L               | B36                   | Cisp              | 1                          | 10.00                         | 1                     |
| F3065L               | B36                   | Cisp              | 1                          | 8.00                          | 2                     |
| WT                   | B36                   | Cisp              | 1                          | 7.00                          | 1                     |
| F3065L               | B36                   | Cisp              | 1.2                        | 7.00                          | 1                     |
| F3065L               | B36                   | Cisp              | 1.2                        | 6.00                          | 2                     |
| WT                   | B36                   | Cisp              | 1.2                        | 7.00                          | 1                     |
| F3065L               | B36                   | Cisp              | 1.5                        | 7.00                          | 1                     |
| F3065L               | B36                   | Cisp              | 1.5                        | 6.00                          | 2                     |
| WT                   | B36                   | Cisp              | 1.5                        | 7.00                          | 1                     |
| F3065L               | B36                   | MMS               | 5                          | 97.00                         | 1                     |
| F3065L               | B36                   | MMS               | 5                          | 92.00                         | 2                     |

| Variant <sup>a</sup> | Batch ID <sup>b</sup> | Drug <sup>c</sup> | Concentration <sup>d</sup> | Percent Survived <sup>e</sup> | Clone ID <sup>f</sup> |
|----------------------|-----------------------|-------------------|----------------------------|-------------------------------|-----------------------|
| WT                   | B36                   | MMS               | 5                          | 83.00                         | 1                     |
| F3065L               | B36                   | MMS               | 10                         | 81.00                         | 1                     |
| F3065L               | B36                   | MMS               | 10                         | 76.00                         | 2                     |
| WT                   | B36                   | MMS               | 10                         | 82.00                         | 1                     |
| F3065L               | B36                   | MMS               | 15                         | 38.00                         | 1                     |
| F3065L               | B36                   | MMS               | 15                         | 52.00                         | 2                     |
| WT                   | B36                   | MMS               | 15                         | 73.00                         | 1                     |
| F3065L               | B36                   | MMS               | 20                         | 19.00                         | 1                     |
| F3065L               | B36                   | MMS               | 20                         | 18.00                         | 2                     |
| WT                   | B36                   | MMS               | 20                         | 52.00                         | 1                     |
| F3065L               | B36                   | MMS               | 30                         | 5.00                          | 1                     |
| F3065L               | B36                   | MMS               | 30                         | 6.00                          | 2                     |
| WT                   | B36                   | MMS               | 30                         | 20.00                         | 1                     |
| F3065L               | B36                   | MMS               | 40                         | 5.00                          | 1                     |
| F3065L               | B36                   | MMS               | 40                         | 4.00                          | 2                     |
| WT                   | B36                   | MMS               | 40                         | 4.00                          | 1                     |
| F3065L               | B36                   | Parp              | 0.01                       | 100.00                        | 1                     |
| F3065L               | B36                   | Parp              | 0.01                       | 100.00                        | 2                     |
| WT                   | B36                   | Parp              | 0.01                       | 99.00                         | 1                     |
| F3065L               | B36                   | Parp              | 0.1                        | 85.00                         | 1                     |
| F3065L               | B36                   | Parp              | 0.1                        | 78.00                         | 2                     |
| WT                   | B36                   | Parp              | 0.1                        | 99.00                         | 1                     |
| F3065L               | B36                   | Parp              | 1                          | 85.00                         | 1                     |
| F3065L               | B36                   | Parp              | 1                          | 53.00                         | 2                     |
| WT                   | B36                   | Parp              | 1                          | 85.00                         | 1                     |
| F3065L               | B36                   | Parp              | 10                         | 7.00                          | 1                     |
| F3065L               | B36                   | Parp              | 10                         | 4.00                          | 2                     |
| WT                   | B36                   | Parp              | 10                         | 16.00                         | 1                     |
| F3065L               | B36                   | IR                | 50                         | 78.00                         | 1                     |
| F3065L               | B36                   | IR                | 50                         | 62.00                         | 2                     |
| WT                   | B36                   | IR                | 50                         | 68.00                         | 1                     |
| F3065L               | B36                   | IR                | 100                        | 74.00                         | 1                     |
| F3065L               | B36                   | IR                | 100                        | 53.00                         | 2                     |
| WT                   | B36                   | IR                | 100                        | 64.00                         | 1                     |
| F3065L               | B36                   | IR                | 200                        | 31.00                         | 1                     |
| F3065L               | B36                   | IR                | 200                        | 25.00                         | 2                     |
| WT                   | B36                   | IR                | 200                        | 38.00                         | 1                     |
| F3065L               | B36                   | IR                | 400                        | 23.00                         | 1                     |
| F3065L               | B36                   | IR                | 400                        | 15.00                         | 2                     |
| WT                   | B36                   | IR                | 400                        | 21.00                         | 1                     |

| Variant <sup>a</sup> | Batch ID <sup>b</sup> | Drug <sup>c</sup> | Concentration <sup>d</sup> | Percent Survived <sup>e</sup> | Clone ID <sup>f</sup> |
|----------------------|-----------------------|-------------------|----------------------------|-------------------------------|-----------------------|
| F3065L               | B36                   | IR                | 600                        | 23.00                         | 1                     |
| F3065L               | B36                   | IR                | 600                        | 12.00                         | 2                     |
| WT                   | B36                   | IR                | 600                        | 11.00                         | 1                     |
| Y3308X               | B37                   | IR                | 50                         | 87.35                         | 2                     |
| WT                   | B37                   | IR                | 50                         | 88.91                         | 1                     |
| Y3308X               | B37                   | IR                | 100                        | 68.11                         | 2                     |
| WT                   | B37                   | IR                | 100                        | 83.75                         | 1                     |
| Y3308X               | B37                   | IR                | 200                        | 27.11                         | 2                     |
| WT                   | B37                   | IR                | 200                        | 67.42                         | 1                     |
| Y3308X               | B37                   | IR                | 400                        | 12.18                         | 2                     |
| WT                   | B37                   | IR                | 400                        | 31.96                         | 1                     |
| Y3308X               | B37                   | IR                | 600                        | 10.20                         | 2                     |
| WT                   | B37                   | IR                | 600                        | 8.52                          | 1                     |
| Y3308X               | B37                   | Cisp              | 0.2                        | 36.98                         | 2                     |
| WT                   | B37                   | Cisp              | 0.2                        | 79.79                         | 1                     |
| Y3308X               | B37                   | Cisp              | 0.4                        | 15.83                         | 2                     |
| WT                   | B37                   | Cisp              | 0.4                        | 50.94                         | 1                     |
| Y3308X               | B37                   | Cisp              | 0.6                        | 10.61                         | 2                     |
| WT                   | B37                   | Cisp              | 0.6                        | 34.70                         | 1                     |
| Y3308X               | B37                   | Cisp              | 1                          | 9.16                          | 2                     |
| WT                   | B37                   | Cisp              | 1                          | 13.56                         | 1                     |
| Y3308X               | B37                   | Cisp              | 1.2                        | 8.45                          | 2                     |
| WT                   | B37                   | Cisp              | 1.2                        | 9.09                          | 1                     |
| Y3308X               | B37                   | Cisp              | 1.5                        | 8.03                          | 2                     |
| WT                   | B37                   | Cisp              | 1.5                        | 5.48                          | 1                     |
| Y3308X               | B37                   | MMC               | 5                          | 68.17                         | 2                     |
| WT                   | B37                   | MMC               | 5                          | 89.84                         | 1                     |
| Y3308X               | B37                   | MMC               | 10                         | 36.72                         | 2                     |
| WT                   | B37                   | MMC               | 10                         | 80.12                         | 1                     |
| Y3308X               | B37                   | MMC               | 20                         | 15.47                         | 2                     |
| WT                   | B37                   | MMC               | 20                         | 51.73                         | 1                     |
| Y3308X               | B37                   | MMC               | 40                         | 10.34                         | 2                     |
| WT                   | B37                   | MMC               | 40                         | 21.68                         | 1                     |
| Y3308X               | B37                   | MMC               | 60                         | 8.80                          | 2                     |
| WT                   | B37                   | MMC               | 60                         | 9.59                          | 1                     |
| Y3308X               | B37                   | MMC               | 80                         | 9.06                          | 2                     |
| WT                   | B37                   | MMC               | 80                         | 4.33                          | 1                     |
| Y3308X               | B37                   | MMS               | 5                          | 82.56                         | 2                     |
| WT                   | B37                   | MMS               | 5                          | 100.00                        | 1                     |
| Y3308X               | B37                   | MMS               | 10                         | 41.16                         | 2                     |

| Variant <sup>a</sup> | Batch ID <sup>b</sup> | Drug <sup>c</sup> | Concentration <sup>d</sup> | Percent Survived <sup>e</sup> | Clone ID <sup>f</sup> |
|----------------------|-----------------------|-------------------|----------------------------|-------------------------------|-----------------------|
| WT                   | B37                   | MMS               | 10                         | 100.00                        | 1                     |
| Y3308X               | B37                   | MMS               | 15                         | 16.49                         | 2                     |
| WT                   | B37                   | MMS               | 15                         | 89.93                         | 1                     |
| Y3308X               | B37                   | MMS               | 20                         | 8.14                          | 2                     |
| WT                   | B37                   | MMS               | 20                         | 62.44                         | 1                     |
| Y3308X               | B37                   | MMS               | 30                         | 5.64                          | 2                     |
| WT                   | B37                   | MMS               | 30                         | 20.20                         | 1                     |
| Y3308X               | B37                   | MMS               | 40                         | 4.71                          | 2                     |
| WT                   | B37                   | MMS               | 40                         | 4.39                          | 1                     |
| T598A                | B38                   | Camp              | 2.5                        | 100.00                        | 1                     |
| T598A                | B38                   | Camp              | 2.5                        | 100.00                        | 2                     |
| WT                   | B38                   | Camp              | 2.5                        | 100.00                        | 1                     |
| T598A                | B38                   | Camp              | 5                          | 99.78                         | 1                     |
| T598A                | B38                   | Camp              | 5                          | 100.00                        | 2                     |
| WT                   | B38                   | Camp              | 5                          | 100.00                        | 1                     |
| T598A                | B38                   | Camp              | 25                         | 80.82                         | 1                     |
| T598A                | B38                   | Camp              | 25                         | 100.00                        | 2                     |
| WT                   | B38                   | Camp              | 25                         | 87.01                         | 1                     |
| T598A                | B38                   | Camp              | 50                         | 43.68                         | 1                     |
| T598A                | B38                   | Camp              | 50                         | 64.06                         | 2                     |
| WT                   | B38                   | Camp              | 50                         | 34.26                         | 1                     |
| T598A                | B38                   | Camp              | 100                        | 14.08                         | 1                     |
| T598A                | B38                   | Camp              | 100                        | 17.21                         | 2                     |
| WT                   | B38                   | Camp              | 100                        | 5.67                          | 1                     |
| T598A                | B38                   | Camp              | 200                        | 8.09                          | 1                     |
| T598A                | B38                   | Camp              | 200                        | 3.44                          | 2                     |
| WT                   | B38                   | Camp              | 200                        | 1.31                          | 1                     |
| T598A                | B38                   | MMC               | 5                          | 100.00                        | 1                     |
| T598A                | B38                   | MMC               | 5                          | 100.00                        | 2                     |
| WT                   | B38                   | MMC               | 5                          | 94.13                         | 1                     |
| T598A                | B38                   | MMC               | 10                         | 93.96                         | 1                     |
| T598A                | B38                   | MMC               | 10                         | 100.00                        | 2                     |
| WT                   | B38                   | MMC               | 10                         | 90.04                         | 1                     |
| T598A                | B38                   | MMC               | 20                         | 92.70                         | 1                     |
| T598A                | B38                   | MMC               | 20                         | 92.06                         | 2                     |
| WT                   | B38                   | MMC               | 20                         | 77.36                         | 1                     |
| T598A                | B38                   | MMC               | 40                         | 58.36                         | 1                     |
| T598A                | B38                   | MMC               | 40                         | 57.78                         | 2                     |
| WT                   | B38                   | MMC               | 40                         | 52.52                         | 1                     |
| T598A                | B38                   | MMC               | 60                         | 35.72                         | 1                     |

| Variant <sup>a</sup> | Batch ID <sup>b</sup> | Drug <sup>c</sup> | Concentration <sup>d</sup> | Percent Survived <sup>e</sup> | Clone ID <sup>f</sup> |
|----------------------|-----------------------|-------------------|----------------------------|-------------------------------|-----------------------|
| T598A                | B38                   | MMC               | 60                         | 29.29                         | 2                     |
| WT                   | B38                   | MMC               | 60                         | 23.27                         | 1                     |
| T598A                | B38                   | MMC               | 80                         | 22.39                         | 1                     |
| T598A                | B38                   | MMC               | 80                         | 21.35                         | 2                     |
| WT                   | B38                   | MMC               | 80                         | 17.09                         | 1                     |
| T598A                | B38                   | Cisp              | 0.2                        | 47.97                         | 1                     |
| T598A                | B38                   | Cisp              | 0.2                        | 49.93                         | 2                     |
| WT                   | B38                   | Cisp              | 0.2                        | 45.49                         | 1                     |
| T598A                | B38                   | Cisp              | 0.4                        | 40.09                         | 1                     |
| T598A                | B38                   | Cisp              | 0.4                        | 49.19                         | 2                     |
| WT                   | B38                   | Cisp              | 0.4                        | 32.54                         | 1                     |
| T598A                | B38                   | Cisp              | 0.6                        | 26.55                         | 1                     |
| T598A                | B38                   | Cisp              | 0.6                        | 33.38                         | 2                     |
| WT                   | B38                   | Cisp              | 0.6                        | 18.50                         | 1                     |
| T598A                | B38                   | Cisp              | 1                          | 15.35                         | 1                     |
| T598A                | B38                   | Cisp              | 1                          | 15.44                         | 2                     |
| WT                   | B38                   | Cisp              | 1                          | 9.10                          | 1                     |
| T598A                | B38                   | Cisp              | 1.2                        | 11.62                         | 1                     |
| T598A                | B38                   | Cisp              | 1.2                        | 10.59                         | 2                     |
| WT                   | B38                   | Cisp              | 1.2                        | 6.63                          | 1                     |
| T598A                | B38                   | Cisp              | 1.5                        | 7.25                          | 1                     |
| T598A                | B38                   | Cisp              | 1.5                        | 7.06                          | 2                     |
| WT                   | B38                   | Cisp              | 1.5                        | 3.78                          | 1                     |
| T598A                | B38                   | MMS               | 5                          | 92.32                         | 1                     |
| T598A                | B38                   | MMS               | 5                          | 100.00                        | 2                     |
| WT                   | B38                   | MMS               | 5                          | 86.00                         | 1                     |
| T598A                | B38                   | MMS               | 10                         | 80.23                         | 1                     |
| T598A                | B38                   | MMS               | 10                         | 100.00                        | 2                     |
| WT                   | B38                   | MMS               | 10                         | 75.64                         | 1                     |
| T598A                | B38                   | MMS               | 15                         | 65.19                         | 1                     |
| T598A                | B38                   | MMS               | 15                         | 96.78                         | 2                     |
| WT                   | B38                   | MMS               | 15                         | 71.30                         | 1                     |
| T598A                | B38                   | MMS               | 20                         | 50.26                         | 1                     |
| T598A                | B38                   | MMS               | 20                         | 78.55                         | 2                     |
| WT                   | B38                   | MMS               | 20                         | 57.50                         | 1                     |
| T598A                | B38                   | MMS               | 30                         | 18.09                         | 1                     |
| T598A                | B38                   | MMS               | 30                         | 24.42                         | 2                     |
| WT                   | B38                   | MMS               | 30                         | 18.15                         | 1                     |
| T598A                | B38                   | MMS               | 40                         | 7.47                          | 1                     |
| T598A                | B38                   | MMS               | 40                         | 6.27                          | 2                     |

| Variant <sup>a</sup> | Batch ID <sup>b</sup> | Drug <sup>c</sup> | Concentration <sup>d</sup> | Percent Survived <sup>e</sup> | Clone ID <sup>f</sup> |
|----------------------|-----------------------|-------------------|----------------------------|-------------------------------|-----------------------|
| WT                   | B38                   | MMS               | 40                         | 6.21                          | 1                     |
| T598A                | B38                   | Parp              | 0.01                       | 72.51                         | 1                     |
| T598A                | B38                   | Parp              | 0.01                       | 81.83                         | 2                     |
| WT                   | B38                   | Parp              | 0.01                       | 98.62                         | 1                     |
| T598A                | B38                   | Parp              | 0.1                        | 27.61                         | 1                     |
| T598A                | B38                   | Parp              | 0.1                        | 20.50                         | 2                     |
| WT                   | B38                   | Parp              | 0.1                        | 60.13                         | 1                     |
| T598A                | B38                   | Parp              | 1                          | 7.19                          | 1                     |
| T598A                | B38                   | Parp              | 1                          | 3.42                          | 2                     |
| WT                   | B38                   | Parp              | 1                          | 2.44                          | 1                     |
| T598A                | B38                   | Parp              | 10                         | 7.31                          | 1                     |
| T598A                | B38                   | Parp              | 10                         | 4.25                          | 2                     |
| WT                   | B38                   | Parp              | 10                         | 2.44                          | 1                     |
| T598A                | B38                   | IR                | 50                         | 84.98                         | 1                     |
| T598A                | B38                   | IR                | 50                         | 89.27                         | 2                     |
| WT                   | B38                   | IR                | 50                         | 89.94                         | 1                     |
| T598A                | B38                   | IR                | 100                        | 68.72                         | 1                     |
| T598A                | B38                   | IR                | 100                        | 79.74                         | 2                     |
| WT                   | B38                   | IR                | 100                        | 69.72                         | 1                     |
| T598A                | B38                   | IR                | 200                        | 45.96                         | 1                     |
| T598A                | B38                   | IR                | 200                        | 57.17                         | 2                     |
| WT                   | B38                   | IR                | 200                        | 52.19                         | 1                     |
| T598A                | B38                   | IR                | 400                        | 29.48                         | 1                     |
| T598A                | B38                   | IR                | 400                        | 31.22                         | 2                     |
| WT                   | B38                   | IR                | 400                        | 37.18                         | 1                     |
| T598A                | B38                   | IR                | 600                        | 16.59                         | 1                     |
| T598A                | B38                   | IR                | 600                        | 14.57                         | 2                     |
| WT                   | B38                   | IR                | 600                        | 15.50                         | 1                     |
| S1479T               | B39                   | Camp              | 2.5                        | 100.00                        | 1                     |
| S1479T               | B39                   | Camp              | 2.5                        | 100.00                        | 2                     |
| WT                   | B39                   | Camp              | 2.5                        | 100.00                        | 1                     |
| S1479T               | B39                   | Camp              | 5                          | 100.00                        | 1                     |
| S1479T               | B39                   | Camp              | 5                          | 100.00                        | 2                     |
| WT                   | B39                   | Camp              | 5                          | 100.00                        | 1                     |
| S1479T               | B39                   | Camp              | 25                         | 75.27                         | 1                     |
| S1479T               | B39                   | Camp              | 25                         | 87.43                         | 2                     |
| WT                   | B39                   | Camp              | 25                         | 87.01                         | 1                     |
| S1479T               | B39                   | Camp              | 50                         | 30.14                         | 1                     |
| S1479T               | B39                   | Camp              | 50                         | 36.92                         | 2                     |
| WT                   | B39                   | Camp              | 50                         | 34.26                         | 1                     |

| Variant <sup>a</sup> | Batch ID <sup>b</sup> | Drug <sup>c</sup> | Concentration <sup>d</sup> | Percent Survived <sup>e</sup> | Clone ID <sup>f</sup> |
|----------------------|-----------------------|-------------------|----------------------------|-------------------------------|-----------------------|
| S1479T               | B39                   | Camp              | 100                        | 6.08                          | 1                     |
| S1479T               | B39                   | Camp              | 100                        | 6.12                          | 2                     |
| WT                   | B39                   | Camp              | 100                        | 5.67                          | 1                     |
| S1479T               | B39                   | Camp              | 200                        | 3.11                          | 1                     |
| S1479T               | B39                   | Camp              | 200                        | 1.59                          | 2                     |
| WT                   | B39                   | Camp              | 200                        | 1.31                          | 1                     |
| S1479T               | B39                   | MMC               | 5                          | 94.76                         | 1                     |
| S1479T               | B39                   | MMC               | 5                          | 86.53                         | 2                     |
| WT                   | B39                   | MMC               | 5                          | 94.13                         | 1                     |
| S1479T               | B39                   | MMC               | 10                         | 86.26                         | 1                     |
| S1479T               | B39                   | MMC               | 10                         | 91.42                         | 2                     |
| WT                   | B39                   | MMC               | 10                         | 90.04                         | 1                     |
| S1479T               | B39                   | MMC               | 20                         | 77.23                         | 1                     |
| S1479T               | B39                   | MMC               | 20                         | 76.85                         | 2                     |
| WT                   | B39                   | MMC               | 20                         | 77.36                         | 1                     |
| S1479T               | B39                   | MMC               | 40                         | 45.29                         | 1                     |
| S1479T               | B39                   | MMC               | 40                         | 45.30                         | 2                     |
| WT                   | B39                   | MMC               | 40                         | 52.52                         | 1                     |
| S1479T               | B39                   | MMC               | 60                         | 23.82                         | 1                     |
| S1479T               | B39                   | MMC               | 60                         | 22.97                         | 2                     |
| WT                   | B39                   | MMC               | 60                         | 23.27                         | 1                     |
| S1479T               | B39                   | MMC               | 80                         | 17.93                         | 1                     |
| S1479T               | B39                   | MMC               | 80                         | 15.96                         | 2                     |
| WT                   | B39                   | MMC               | 80                         | 17.09                         | 1                     |
| S1479T               | B39                   | Cisp              | 0.2                        | 48.71                         | 1                     |
| S1479T               | B39                   | Cisp              | 0.2                        | 49.03                         | 2                     |
| WT                   | B39                   | Cisp              | 0.2                        | 45.49                         | 1                     |
| S1479T               | B39                   | Cisp              | 0.4                        | 42.49                         | 1                     |
| S1479T               | B39                   | Cisp              | 0.4                        | 43.55                         | 2                     |
| WT                   | B39                   | Cisp              | 0.4                        | 32.54                         | 1                     |
| S1479T               | B39                   | Cisp              | 0.6                        | 25.03                         | 1                     |
| S1479T               | B39                   | Cisp              | 0.6                        | 24.79                         | 2                     |
| WT                   | B39                   | Cisp              | 0.6                        | 18.50                         | 1                     |
| S1479T               | B39                   | Cisp              | 1                          | 12.31                         | 1                     |
| S1479T               | B39                   | Cisp              | 1                          | 10.31                         | 2                     |
| WT                   | B39                   | Cisp              | 1                          | 9.10                          | 1                     |
| S1479T               | B39                   | Cisp              | 1.2                        | 9.20                          | 1                     |
| S1479T               | B39                   | Cisp              | 1.2                        | 7.52                          | 2                     |
| WT                   | B39                   | Cisp              | 1.2                        | 6.63                          | 1                     |
| S1479T               | B39                   | Cisp              | 1.5                        | 5.68                          | 1                     |



| Variant <sup>a</sup> | Batch ID <sup>b</sup> | Drug <sup>c</sup> | Concentration <sup>d</sup> | Percent Survived <sup>e</sup> | Clone ID <sup>f</sup> |
|----------------------|-----------------------|-------------------|----------------------------|-------------------------------|-----------------------|
| S1479T               | B39                   | Cisp              | 1.5                        | 4.46                          | 2                     |
| WT                   | B39                   | Cisp              | 1.5                        | 3.78                          | 1                     |
| S1479T               | B39                   | MMS               | 5                          | 95.92                         | 1                     |
| S1479T               | B39                   | MMS               | 5                          | 98.47                         | 2                     |
| WT                   | B39                   | MMS               | 5                          | 100.00                        | 1                     |
| S1479T               | B39                   | MMS               | 10                         | 89.38                         | 1                     |
| S1479T               | B39                   | MMS               | 10                         | 88.40                         | 2                     |
| WT                   | B39                   | MMS               | 10                         | 100.00                        | 1                     |
| S1479T               | B39                   | MMS               | 15                         | 68.87                         | 1                     |
| S1479T               | B39                   | MMS               | 15                         | 67.59                         | 2                     |
| WT                   | B39                   | MMS               | 15                         | 72.85                         | 1                     |
| S1479T               | B39                   | MMS               | 20                         | 62.89                         | 1                     |
| S1479T               | B39                   | MMS               | 20                         | 59.44                         | 2                     |
| WT                   | B39                   | MMS               | 20                         | 62.73                         | 1                     |
| S1479T               | B39                   | MMS               | 30                         | 12.25                         | 1                     |
| S1479T               | B39                   | MMS               | 30                         | 10.74                         | 2                     |
| WT                   | B39                   | MMS               | 30                         | 17.35                         | 1                     |
| S1479T               | B39                   | MMS               | 40                         | 6.53                          | 1                     |
| S1479T               | B39                   | MMS               | 40                         | 6.62                          | 2                     |
| WT                   | B39                   | MMS               | 40                         | 6.75                          | 1                     |
| S1479T               | B39                   | Parp              | 0.01                       | 52.47                         | 1                     |
| S1479T               | B39                   | Parp              | 0.01                       | 44.88                         | 2                     |
| WT                   | B39                   | Parp              | 0.01                       | 80.40                         | 1                     |
| S1479T               | B39                   | Parp              | 0.1                        | 22.38                         | 1                     |
| S1479T               | B39                   | Parp              | 0.1                        | 6.93                          | 2                     |
| WT                   | B39                   | Parp              | 0.1                        | 54.36                         | 1                     |
| S1479T               | B39                   | Parp              | 1                          | 1.00                          | 1                     |
| S1479T               | B39                   | Parp              | 1                          | 1.00                          | 2                     |
| WT                   | B39                   | Parp              | 1                          | 1.00                          | 1                     |
| S1479T               | B39                   | Parp              | 10                         | 1.00                          | 1                     |
| S1479T               | B39                   | Parp              | 10                         | 1.00                          | 2                     |
| WT                   | B39                   | Parp              | 10                         | 1.00                          | 1                     |
| S1479T               | B39                   | IR                | 50                         | 57.85                         | 1                     |
| S1479T               | B39                   | IR                | 50                         | 58.68                         | 2                     |
| WT                   | B39                   | IR                | 50                         | 84.04                         | 1                     |
| S1479T               | B39                   | IR                | 100                        | 53.01                         | 1                     |
| S1479T               | B39                   | IR                | 100                        | 35.85                         | 2                     |
| WT                   | B39                   | IR                | 100                        | 78.67                         | 1                     |
| S1479T               | B39                   | IR                | 200                        | 14.52                         | 1                     |
| S1479T               | B39                   | IR                | 200                        | 10.42                         | 2                     |

| Variant <sup>a</sup> | Batch ID <sup>b</sup> | Drug <sup>c</sup> | Concentration <sup>d</sup> | Percent Survived <sup>e</sup> | Clone ID <sup>f</sup> |
|----------------------|-----------------------|-------------------|----------------------------|-------------------------------|-----------------------|
| WT                   | B39                   | IR                | 200                        | 25.20                         | 1                     |
| S1479T               | B39                   | IR                | 400                        | 6.76                          | 1                     |
| S1479T               | B39                   | IR                | 400                        | 6.68                          | 2                     |
| WT                   | B39                   | IR                | 400                        | 6.48                          | 1                     |
| S1479T               | B39                   | IR                | 600                        | 6.18                          | 1                     |
| S1479T               | B39                   | IR                | 600                        | 6.60                          | 2                     |
| WT                   | B39                   | IR                | 600                        | 5.85                          | 1                     |
| T598I                | B40                   | Camp              | 2.5                        | 100.00                        | 1                     |
| T598I                | B40                   | Camp              | 2.5                        | 95.30                         | 2                     |
| WT                   | B40                   | Camp              | 2.5                        | 100.00                        | 1                     |
| T598I                | B40                   | Camp              | 5                          | 93.69                         | 1                     |
| T598I                | B40                   | Camp              | 5                          | 100.00                        | 2                     |
| WT                   | B40                   | Camp              | 5                          | 99.69                         | 1                     |
| T598I                | B40                   | Camp              | 25                         | 84.85                         | 1                     |
| T598I                | B40                   | Camp              | 25                         | 76.75                         | 2                     |
| WT                   | B40                   | Camp              | 25                         | 80.49                         | 1                     |
| T598I                | B40                   | Camp              | 50                         | 41.26                         | 1                     |
| T598I                | B40                   | Camp              | 50                         | 41.14                         | 2                     |
| WT                   | B40                   | Camp              | 50                         | 46.50                         | 1                     |
| T598I                | B40                   | Camp              | 100                        | 10.10                         | 1                     |
| T598I                | B40                   | Camp              | 100                        | 10.80                         | 2                     |
| WT                   | B40                   | Camp              | 100                        | 12.12                         | 1                     |
| T598I                | B40                   | Camp              | 200                        | 2.23                          | 1                     |
| T598I                | B40                   | Camp              | 200                        | 2.47                          | 2                     |
| WT                   | B40                   | Camp              | 200                        | 3.46                          | 1                     |
| T598I                | B40                   | MMC               | 5                          | 80.37                         | 1                     |
| T598I                | B40                   | MMC               | 5                          | 71.81                         | 2                     |
| WT                   | B40                   | MMC               | 5                          | 87.56                         | 1                     |
| T598I                | B40                   | MMC               | 10                         | 58.69                         | 1                     |
| T598I                | B40                   | MMC               | 10                         | 68.14                         | 2                     |
| WT                   | B40                   | MMC               | 10                         | 74.88                         | 1                     |
| T598I                | B40                   | MMC               | 20                         | 51.56                         | 1                     |
| T598I                | B40                   | MMC               | 20                         | 50.26                         | 2                     |
| WT                   | B40                   | MMC               | 20                         | 66.67                         | 1                     |
| T598I                | B40                   | MMC               | 40                         | 18.55                         | 1                     |
| T598I                | B40                   | MMC               | 40                         | 16.70                         | 2                     |
| WT                   | B40                   | MMC               | 40                         | 33.95                         | 1                     |
| T598I                | B40                   | MMC               | 60                         | 9.47                          | 1                     |
| T598I                | B40                   | MMC               | 60                         | 10.05                         | 2                     |
| WT                   | B40                   | MMC               | 60                         | 15.90                         | 1                     |

| Variant <sup>a</sup> | Batch ID <sup>b</sup> | Drug <sup>c</sup> | Concentration <sup>d</sup> | Percent Survived <sup>e</sup> | Clone ID <sup>f</sup> |
|----------------------|-----------------------|-------------------|----------------------------|-------------------------------|-----------------------|
| T598I                | B40                   | MMC               | 80                         | 5.96                          | 1                     |
| T598I                | B40                   | MMC               | 80                         | 6.39                          | 2                     |
| WT                   | B40                   | MMC               | 80                         | 7.83                          | 1                     |
| T598I                | B40                   | Cisp              | 0.2                        | 63.01                         | 1                     |
| T598I                | B40                   | Cisp              | 0.2                        | 58.68                         | 2                     |
| WT                   | B40                   | Cisp              | 0.2                        | 77.90                         | 1                     |
| T598I                | B40                   | Cisp              | 0.4                        | 28.48                         | 1                     |
| T598I                | B40                   | Cisp              | 0.4                        | 28.54                         | 2                     |
| WT                   | B40                   | Cisp              | 0.4                        | 50.75                         | 1                     |
| T598I                | B40                   | Cisp              | 0.6                        | 15.68                         | 1                     |
| T598I                | B40                   | Cisp              | 0.6                        | 10.78                         | 2                     |
| WT                   | B40                   | Cisp              | 0.6                        | 35.18                         | 1                     |
| T598I                | B40                   | Cisp              | 1                          | 1.00                          | 1                     |
| T598I                | B40                   | Cisp              | 1                          | 1.00                          | 2                     |
| WT                   | B40                   | Cisp              | 1                          | 14.98                         | 1                     |
| T598I                | B40                   | Cisp              | 1.2                        | 4.10                          | 1                     |
| T598I                | B40                   | Cisp              | 1.2                        | 3.89                          | 2                     |
| WT                   | B40                   | Cisp              | 1.2                        | 8.03                          | 1                     |
| T598I                | B40                   | Cisp              | 1.5                        | 4.71                          | 1                     |
| T598I                | B40                   | Cisp              | 1.5                        | 5.19                          | 2                     |
| WT                   | B40                   | Cisp              | 1.5                        | 5.38                          | 1                     |
| T598I                | B40                   | MMS               | 5                          | 100.00                        | 1                     |
| T598I                | B40                   | MMS               | 5                          | 100.00                        | 2                     |
| WT                   | B40                   | MMS               | 5                          | 100.00                        | 1                     |
| T598I                | B40                   | MMS               | 10                         | 87.47                         | 1                     |
| T598I                | B40                   | MMS               | 10                         | 73.22                         | 2                     |
| WT                   | B40                   | MMS               | 10                         | 80.68                         | 1                     |
| T598I                | B40                   | MMS               | 15                         | 72.77                         | 1                     |
| T598I                | B40                   | MMS               | 15                         | 64.03                         | 2                     |
| WT                   | B40                   | MMS               | 15                         | 79.08                         | 1                     |
| T598I                | B40                   | MMS               | 20                         | 45.06                         | 1                     |
| T598I                | B40                   | MMS               | 20                         | 39.58                         | 2                     |
| WT                   | B40                   | MMS               | 20                         | 55.80                         | 1                     |
| T598I                | B40                   | MMS               | 30                         | 7.95                          | 1                     |
| T598I                | B40                   | MMS               | 30                         | 6.75                          | 2                     |
| WT                   | B40                   | MMS               | 30                         | 13.01                         | 1                     |
| T598I                | B40                   | MMS               | 40                         | 1.20                          | 1                     |
| T598I                | B40                   | MMS               | 40                         | 1.63                          | 2                     |
| WT                   | B40                   | MMS               | 40                         | 4.43                          | 1                     |
| T598I                | B40                   | Parp              | 0.01                       | 66.47                         | 1                     |

| Variant <sup>a</sup> | Batch ID <sup>b</sup> | Drug <sup>c</sup> | Concentration <sup>d</sup> | Percent Survived <sup>e</sup> | Clone ID <sup>f</sup> |
|----------------------|-----------------------|-------------------|----------------------------|-------------------------------|-----------------------|
| T598I                | B40                   | Parp              | 0.01                       | 72.93                         | 2                     |
| WT                   | B40                   | Parp              | 0.01                       | 93.12                         | 1                     |
| T598I                | B40                   | Parp              | 0.1                        | 24.21                         | 1                     |
| T598I                | B40                   | Parp              | 0.1                        | 35.71                         | 2                     |
| WT                   | B40                   | Parp              | 0.1                        | 54.62                         | 1                     |
| T598I                | B40                   | Parp              | 1                          | 1.00                          | 1                     |
| T598I                | B40                   | Parp              | 1                          | 1.68                          | 2                     |
| WT                   | B40                   | Parp              | 1                          | 6.68                          | 1                     |
| T598I                | B40                   | Parp              | 10                         | 1.00                          | 1                     |
| T598I                | B40                   | Parp              | 10                         | 2.65                          | 2                     |
| WT                   | B40                   | Parp              | 10                         | 8.94                          | 1                     |
| T598I                | B40                   | IR                | 50                         | 87.50                         | 1                     |
| T598I                | B40                   | IR                | 50                         | 86.16                         | 2                     |
| WT                   | B40                   | IR                | 50                         | 96.96                         | 1                     |
| T598I                | B40                   | IR                | 100                        | 78.28                         | 1                     |
| T598I                | B40                   | IR                | 100                        | 72.40                         | 2                     |
| WT                   | B40                   | IR                | 100                        | 83.99                         | 1                     |
| T598I                | B40                   | IR                | 200                        | 54.70                         | 1                     |
| T598I                | B40                   | IR                | 200                        | 51.32                         | 2                     |
| WT                   | B40                   | IR                | 200                        | 57.73                         | 1                     |
| T598I                | B40                   | IR                | 400                        | 28.10                         | 1                     |
| T598I                | B40                   | IR                | 400                        | 27.76                         | 2                     |
| WT                   | B40                   | IR                | 400                        | 41.79                         | 1                     |
| T598I                | B40                   | IR                | 600                        | 14.27                         | 1                     |
| T598I                | B40                   | IR                | 600                        | 12.36                         | 2                     |
| WT                   | B40                   | IR                | 600                        | 29.78                         | 1                     |
| K169R                | B41                   | Camp              | 2.5                        | 99.65                         | 1                     |
| K169R                | B41                   | Camp              | 2.5                        | 92.77                         | 2                     |
| WT                   | B41                   | Camp              | 2.5                        | 100.00                        | 1                     |
| K169R                | B41                   | Camp              | 5                          | 100.00                        | 1                     |
| K169R                | B41                   | Camp              | 5                          | 100.00                        | 2                     |
| WT                   | B41                   | Camp              | 5                          | 96.92                         | 1                     |
| K169R                | B41                   | Camp              | 25                         | 83.26                         | 1                     |
| K169R                | B41                   | Camp              | 25                         | 79.11                         | 2                     |
| WT                   | B41                   | Camp              | 25                         | 92.70                         | 1                     |
| K169R                | B41                   | Camp              | 50                         | 59.18                         | 1                     |
| K169R                | B41                   | Camp              | 50                         | 61.65                         | 2                     |
| WT                   | B41                   | Camp              | 50                         | 66.74                         | 1                     |
| K169R                | B41                   | Camp              | 100                        | 12.99                         | 1                     |
| K169R                | B41                   | Camp              | 100                        | 16.73                         | 2                     |

| Variant <sup>a</sup> | Batch ID <sup>b</sup> | Drug <sup>c</sup> | Concentration <sup>d</sup> | Percent Survived <sup>e</sup> | Clone ID <sup>f</sup> |
|----------------------|-----------------------|-------------------|----------------------------|-------------------------------|-----------------------|
| WT                   | B41                   | Camp              | 100                        | 19.46                         | 1                     |
| K169R                | B41                   | Camp              | 200                        | 1.48                          | 1                     |
| K169R                | B41                   | Camp              | 200                        | 1.39                          | 2                     |
| WT                   | B41                   | Camp              | 200                        | 1.93                          | 1                     |
| K169R                | B41                   | MMC               | 5                          | 82.90                         | 1                     |
| K169R                | B41                   | MMC               | 5                          | 84.85                         | 2                     |
| WT                   | B41                   | MMC               | 5                          | 100.00                        | 1                     |
| K169R                | B41                   | MMC               | 10                         | 66.93                         | 1                     |
| K169R                | B41                   | MMC               | 10                         | 67.91                         | 2                     |
| WT                   | B41                   | MMC               | 10                         | 100.00                        | 1                     |
| K169R                | B41                   | MMC               | 20                         | 44.16                         | 1                     |
| K169R                | B41                   | MMC               | 20                         | 45.11                         | 2                     |
| WT                   | B41                   | MMC               | 20                         | 65.29                         | 1                     |
| K169R                | B41                   | MMC               | 40                         | 12.31                         | 1                     |
| K169R                | B41                   | MMC               | 40                         | 15.30                         | 2                     |
| WT                   | B41                   | MMC               | 40                         | 39.48                         | 1                     |
| K169R                | B41                   | MMC               | 60                         | 4.78                          | 1                     |
| K169R                | B41                   | MMC               | 60                         | 5.21                          | 2                     |
| WT                   | B41                   | MMC               | 60                         | 14.19                         | 1                     |
| K169R                | B41                   | MMC               | 80                         | 3.56                          | 1                     |
| K169R                | B41                   | MMC               | 80                         | 3.74                          | 2                     |
| WT                   | B41                   | MMC               | 80                         | 6.15                          | 1                     |
| K169R                | B41                   | Cisp              | 0.2                        | 66.48                         | 1                     |
| K169R                | B41                   | Cisp              | 0.2                        | 61.93                         | 2                     |
| WT                   | B41                   | Cisp              | 0.2                        | 78.17                         | 1                     |
| K169R                | B41                   | Cisp              | 0.4                        | 42.12                         | 1                     |
| K169R                | B41                   | Cisp              | 0.4                        | 43.03                         | 2                     |
| WT                   | B41                   | Cisp              | 0.4                        | 54.62                         | 1                     |
| K169R                | B41                   | Cisp              | 0.6                        | 29.98                         | 1                     |
| K169R                | B41                   | Cisp              | 0.6                        | 26.78                         | 2                     |
| WT                   | B41                   | Cisp              | 0.6                        | 40.90                         | 1                     |
| K169R                | B41                   | Cisp              | 1                          | 12.15                         | 1                     |
| K169R                | B41                   | Cisp              | 1                          | 11.83                         | 2                     |
| WT                   | B41                   | Cisp              | 1                          | 14.44                         | 1                     |
| K169R                | B41                   | Cisp              | 1.2                        | 7.45                          | 1                     |
| K169R                | B41                   | Cisp              | 1.2                        | 7.27                          | 2                     |
| WT                   | B41                   | Cisp              | 1.2                        | 11.88                         | 1                     |
| K169R                | B41                   | Cisp              | 1.5                        | 5.62                          | 1                     |
| K169R                | B41                   | Cisp              | 1.5                        | 6.53                          | 2                     |
| WT                   | B41                   | Cisp              | 1.5                        | 5.76                          | 1                     |

| Variant <sup>a</sup> | Batch ID <sup>b</sup> | Drug <sup>c</sup> | Concentration <sup>d</sup> | Percent Survived <sup>e</sup> | Clone ID <sup>f</sup> |
|----------------------|-----------------------|-------------------|----------------------------|-------------------------------|-----------------------|
| K169R                | B41                   | MMS               | 5                          | 90.89                         | 1                     |
| K169R                | B41                   | MMS               | 5                          | 97.43                         | 2                     |
| WT                   | B41                   | MMS               | 5                          | 100.00                        | 1                     |
| K169R                | B41                   | MMS               | 10                         | 84.69                         | 1                     |
| K169R                | B41                   | MMS               | 10                         | 79.75                         | 2                     |
| WT                   | B41                   | MMS               | 10                         | 100.00                        | 1                     |
| K169R                | B41                   | MMS               | 15                         | 63.67                         | 1                     |
| K169R                | B41                   | MMS               | 15                         | 70.35                         | 2                     |
| WT                   | B41                   | MMS               | 15                         | 79.91                         | 1                     |
| K169R                | B41                   | MMS               | 20                         | 53.77                         | 1                     |
| K169R                | B41                   | MMS               | 20                         | 55.05                         | 2                     |
| WT                   | B41                   | MMS               | 20                         | 88.30                         | 1                     |
| K169R                | B41                   | MMS               | 30                         | 11.85                         | 1                     |
| K169R                | B41                   | MMS               | 30                         | 11.41                         | 2                     |
| WT                   | B41                   | MMS               | 30                         | 43.27                         | 1                     |
| K169R                | B41                   | MMS               | 40                         | 1.70                          | 1                     |
| K169R                | B41                   | MMS               | 40                         | 2.85                          | 2                     |
| WT                   | B41                   | MMS               | 40                         | 3.90                          | 1                     |
| K169R                | B41                   | Parp              | 0.01                       | 75.61                         | 1                     |
| K169R                | B41                   | Parp              | 0.01                       | 68.38                         | 2                     |
| WT                   | B41                   | Parp              | 0.01                       | 87.08                         | 1                     |
| K169R                | B41                   | Parp              | 0.1                        | 27.85                         | 1                     |
| K169R                | B41                   | Parp              | 0.1                        | 33.92                         | 2                     |
| WT                   | B41                   | Parp              | 0.1                        | 62.50                         | 1                     |
| K169R                | B41                   | Parp              | 1                          | 2.35                          | 1                     |
| K169R                | B41                   | Parp              | 1                          | 3.37                          | 2                     |
| WT                   | B41                   | Parp              | 1                          | 5.62                          | 1                     |
| K169R                | B41                   | Parp              | 10                         | 3.45                          | 1                     |
| K169R                | B41                   | Parp              | 10                         | 3.19                          | 2                     |
| WT                   | B41                   | Parp              | 10                         | 2.17                          | 1                     |
| K169R                | B41                   | IR                | 50                         | 82.41                         | 1                     |
| K169R                | B41                   | IR                | 50                         | 89.68                         | 2                     |
| WT                   | B41                   | IR                | 50                         | 88.13                         | 1                     |
| K169R                | B41                   | IR                | 100                        | 67.83                         | 1                     |
| K169R                | B41                   | IR                | 100                        | 71.98                         | 2                     |
| WT                   | B41                   | IR                | 100                        | 76.27                         | 1                     |
| K169R                | B41                   | IR                | 200                        | 63.42                         | 1                     |
| K169R                | B41                   | IR                | 200                        | 62.34                         | 2                     |
| WT                   | B41                   | IR                | 200                        | 74.15                         | 1                     |
| K169R                | B41                   | IR                | 400                        | 36.82                         | 1                     |

| Variant <sup>a</sup> | Batch ID <sup>b</sup> | Drug <sup>c</sup> | Concentration <sup>d</sup> | Percent Survived <sup>e</sup> | Clone ID <sup>f</sup> |
|----------------------|-----------------------|-------------------|----------------------------|-------------------------------|-----------------------|
| K169R                | B41                   | IR                | 400                        | 32.97                         | 2                     |
| WT                   | B41                   | IR                | 400                        | 43.50                         | 1                     |
| K169R                | B41                   | IR                | 600                        | 19.05                         | 1                     |
| K169R                | B41                   | IR                | 600                        | 21.09                         | 2                     |
| WT                   | B41                   | IR                | 600                        | 23.40                         | 1                     |
| C3233Wfs             | B42                   | Camp              | 2.5                        | 85.54                         | 1                     |
| C3233Wfs             | B42                   | Camp              | 2.5                        | 97.15                         | 2                     |
| WT                   | B42                   | Camp              | 2.5                        | 89.91                         | 1                     |
| C3233Wfs             | B42                   | Camp              | 5                          | 76.81                         | 1                     |
| C3233Wfs             | B42                   | Camp              | 5                          | 91.55                         | 2                     |
| WT                   | B42                   | Camp              | 5                          | 87.41                         | 1                     |
| C3233Wfs             | B42                   | Camp              | 25                         | 20.95                         | 1                     |
| C3233Wfs             | B42                   | Camp              | 25                         | 34.96                         | 2                     |
| WT                   | B42                   | Camp              | 25                         | 74.40                         | 1                     |
| C3233Wfs             | B42                   | Camp              | 50                         | 3.29                          | 1                     |
| C3233Wfs             | B42                   | Camp              | 50                         | 6.86                          | 2                     |
| WT                   | B42                   | Camp              | 50                         | 61.29                         | 1                     |
| C3233Wfs             | B42                   | Camp              | 100                        | 1.00                          | 1                     |
| C3233Wfs             | B42                   | Camp              | 100                        | 1.00                          | 2                     |
| WT                   | B42                   | Camp              | 100                        | 16.21                         | 1                     |
| C3233Wfs             | B42                   | Camp              | 200                        | 1.45                          | 1                     |
| C3233Wfs             | B42                   | Camp              | 200                        | 1.00                          | 2                     |
| WT                   | B42                   | Camp              | 200                        | 2.41                          | 1                     |
| C3233Wfs             | B42                   | MMC               | 5                          | 27.50                         | 1                     |
| C3233Wfs             | B42                   | MMC               | 5                          | 52.81                         | 2                     |
| WT                   | B42                   | MMC               | 5                          | 73.55                         | 1                     |
| C3233Wfs             | B42                   | MMC               | 10                         | 8.25                          | 1                     |
| C3233Wfs             | B42                   | MMC               | 10                         | 21.04                         | 2                     |
| WT                   | B42                   | MMC               | 10                         | 66.47                         | 1                     |
| C3233Wfs             | B42                   | MMC               | 20                         | 1.87                          | 1                     |
| C3233Wfs             | B42                   | MMC               | 20                         | 1.00                          | 2                     |
| WT                   | B42                   | MMC               | 20                         | 43.72                         | 1                     |
| C3233Wfs             | B42                   | MMC               | 40                         | 1.08                          | 1                     |
| C3233Wfs             | B42                   | MMC               | 40                         | 1.00                          | 2                     |
| WT                   | B42                   | MMC               | 40                         | 15.43                         | 1                     |
| C3233Wfs             | B42                   | MMC               | 60                         | 1.00                          | 1                     |
| C3233Wfs             | B42                   | MMC               | 60                         | 1.00                          | 2                     |
| WT                   | B42                   | MMC               | 60                         | 5.38                          | 1                     |
| C3233Wfs             | B42                   | MMC               | 80                         | 1.00                          | 1                     |
| C3233Wfs             | B42                   | MMC               | 80                         | 1.00                          | 2                     |

| Variant <sup>a</sup> | Batch ID <sup>b</sup> | Drug <sup>c</sup> | Concentration <sup>d</sup> | Percent Survived <sup>e</sup> | Clone ID <sup>f</sup> |
|----------------------|-----------------------|-------------------|----------------------------|-------------------------------|-----------------------|
| WT                   | B42                   | MMC               | 80                         | 4.42                          | 1                     |
| C3233Wfs             | B42                   | Cisp              | 0.2                        | 10.31                         | 1                     |
| C3233Wfs             | B42                   | Cisp              | 0.2                        | 18.28                         | 2                     |
| WT                   | B42                   | Cisp              | 0.2                        | 53.96                         | 1                     |
| C3233Wfs             | B42                   | Cisp              | 0.4                        | 1.67                          | 1                     |
| C3233Wfs             | B42                   | Cisp              | 0.4                        | 3.34                          | 2                     |
| WT                   | B42                   | Cisp              | 0.4                        | 25.79                         | 1                     |
| C3233Wfs             | B42                   | Cisp              | 0.6                        | 1.67                          | 1                     |
| C3233Wfs             | B42                   | Cisp              | 0.6                        | 1.00                          | 2                     |
| WT                   | B42                   | Cisp              | 0.6                        | 14.56                         | 1                     |
| C3233Wfs             | B42                   | Cisp              | 1                          | 1.11                          | 1                     |
| C3233Wfs             | B42                   | Cisp              | 1                          | 1.00                          | 2                     |
| WT                   | B42                   | Cisp              | 1                          | 5.14                          | 1                     |
| C3233Wfs             | B42                   | Cisp              | 1.2                        | 1.00                          | 1                     |
| C3233Wfs             | B42                   | Cisp              | 1.2                        | 1.00                          | 2                     |
| WT                   | B42                   | Cisp              | 1.2                        | 2.61                          | 1                     |
| C3233Wfs             | B42                   | Cisp              | 1.5                        | 1.30                          | 1                     |
| C3233Wfs             | B42                   | Cisp              | 1.5                        | 1.00                          | 2                     |
| WT                   | B42                   | Cisp              | 1.5                        | 1.50                          | 1                     |
| C3233Wfs             | B42                   | MMS               | 5                          | 65.39                         | 1                     |
| C3233Wfs             | B42                   | MMS               | 5                          | 85.51                         | 2                     |
| WT                   | B42                   | MMS               | 5                          | 100.00                        | 1                     |
| C3233Wfs             | B42                   | MMS               | 10                         | 14.55                         | 1                     |
| C3233Wfs             | B42                   | MMS               | 10                         | 43.09                         | 2                     |
| WT                   | B42                   | MMS               | 10                         | 88.83                         | 1                     |
| C3233Wfs             | B42                   | MMS               | 15                         | 6.49                          | 1                     |
| C3233Wfs             | B42                   | MMS               | 15                         | 24.73                         | 2                     |
| WT                   | B42                   | MMS               | 15                         | 78.70                         | 1                     |
| C3233Wfs             | B42                   | MMS               | 20                         | 2.85                          | 1                     |
| C3233Wfs             | B42                   | MMS               | 20                         | 6.16                          | 2                     |
| WT                   | B42                   | MMS               | 20                         | 72.03                         | 1                     |
| C3233Wfs             | B42                   | MMS               | 30                         | 1.00                          | 1                     |
| C3233Wfs             | B42                   | MMS               | 30                         | 1.00                          | 2                     |
| WT                   | B42                   | MMS               | 30                         | 13.16                         | 1                     |
| C3233Wfs             | B42                   | MMS               | 40                         | 1.38                          | 1                     |
| C3233Wfs             | B42                   | MMS               | 40                         | 1.00                          | 2                     |
| WT                   | B42                   | MMS               | 40                         | 2.25                          | 1                     |
| C3233Wfs             | B42                   | Parp              | 0.01                       | 1.99                          | 1                     |
| C3233Wfs             | B42                   | Parp              | 0.01                       | 18.75                         | 2                     |
| WT                   | B42                   | Parp              | 0.01                       | 69.09                         | 1                     |



| Variant <sup>a</sup> | Batch ID <sup>b</sup> | Drug <sup>c</sup> | Concentration <sup>d</sup> | Percent Survived <sup>e</sup> | Clone ID <sup>f</sup> |
|----------------------|-----------------------|-------------------|----------------------------|-------------------------------|-----------------------|
| C3233Wfs             | B42                   | Parp              | 0.1                        | 1.22                          | 1                     |
| C3233Wfs             | B42                   | Parp              | 0.1                        | 1.76                          | 2                     |
| WT                   | B42                   | Parp              | 0.1                        | 42.13                         | 1                     |
| C3233Wfs             | B42                   | Parp              | 1                          | 1.88                          | 1                     |
| C3233Wfs             | B42                   | Parp              | 1                          | 1.00                          | 2                     |
| WT                   | B42                   | Parp              | 1                          | 1.97                          | 1                     |
| C3233Wfs             | B42                   | Parp              | 10                         | 2.99                          | 1                     |
| C3233Wfs             | B42                   | Parp              | 10                         | 1.00                          | 2                     |
| WT                   | B42                   | Parp              | 10                         | 3.84                          | 1                     |
| C3233Wfs             | B42                   | IR                | 50                         | 71.41                         | 1                     |
| C3233Wfs             | B42                   | IR                | 50                         | 94.09                         | 2                     |
| WT                   | B42                   | IR                | 50                         | 89.72                         | 1                     |
| C3233Wfs             | B42                   | IR                | 100                        | 53.61                         | 1                     |
| C3233Wfs             | B42                   | IR                | 100                        | 62.17                         | 2                     |
| WT                   | B42                   | IR                | 100                        | 78.08                         | 1                     |
| C3233Wfs             | B42                   | IR                | 200                        | 21.46                         | 1                     |
| C3233Wfs             | B42                   | IR                | 200                        | 40.07                         | 2                     |
| WT                   | B42                   | IR                | 200                        | 54.70                         | 1                     |
| C3233Wfs             | B42                   | IR                | 400                        | 10.57                         | 1                     |
| C3233Wfs             | B42                   | IR                | 400                        | 9.26                          | 2                     |
| WT                   | B42                   | IR                | 400                        | 27.22                         | 1                     |
| C3233Wfs             | B42                   | IR                | 600                        | 9.70                          | 1                     |
| C3233Wfs             | B42                   | IR                | 600                        | 7.78                          | 2                     |
| WT                   | B42                   | IR                | 600                        | 17.80                         | 1                     |
| L2587F               | B43                   | Camp              | 2.5                        | 98.32                         | 1                     |
| L2587F               | B43                   | Camp              | 2.5                        | 100.00                        | 2                     |
| WT                   | B43                   | Camp              | 2.5                        | 100.00                        | 1                     |
| L2587F               | B43                   | Camp              | 5                          | 100.00                        | 1                     |
| L2587F               | B43                   | Camp              | 5                          | 100.00                        | 2                     |
| WT                   | B43                   | Camp              | 5                          | 97.28                         | 1                     |
| L2587F               | B43                   | Camp              | 25                         | 87.01                         | 1                     |
| L2587F               | B43                   | Camp              | 25                         | 97.31                         | 2                     |
| WT                   | B43                   | Camp              | 25                         | 96.28                         | 1                     |
| L2587F               | B43                   | Camp              | 50                         | 77.80                         | 1                     |
| L2587F               | B43                   | Camp              | 50                         | 83.28                         | 2                     |
| WT                   | B43                   | Camp              | 50                         | 80.04                         | 1                     |
| L2587F               | B43                   | Camp              | 100                        | 35.84                         | 1                     |
| L2587F               | B43                   | Camp              | 100                        | 50.81                         | 2                     |
| WT                   | B43                   | Camp              | 100                        | 52.07                         | 1                     |
| L2587F               | B43                   | Camp              | 200                        | 1.87                          | 1                     |

| Variant <sup>a</sup> | Batch ID <sup>b</sup> | Drug <sup>c</sup> | Concentration <sup>d</sup> | Percent Survived <sup>e</sup> | Clone ID <sup>f</sup> |
|----------------------|-----------------------|-------------------|----------------------------|-------------------------------|-----------------------|
| L2587F               | B43                   | Camp              | 200                        | 6.08                          | 2                     |
| WT                   | B43                   | Camp              | 200                        | 14.14                         | 1                     |
| L2587F               | B43                   | MMC               | 5                          | 80.21                         | 1                     |
| L2587F               | B43                   | MMC               | 5                          | 73.42                         | 2                     |
| WT                   | B43                   | MMC               | 5                          | 80.27                         | 1                     |
| L2587F               | B43                   | MMC               | 10                         | 67.43                         | 1                     |
| L2587F               | B43                   | MMC               | 10                         | 68.06                         | 2                     |
| WT                   | B43                   | MMC               | 10                         | 65.97                         | 1                     |
| L2587F               | B43                   | MMC               | 20                         | 41.31                         | 1                     |
| L2587F               | B43                   | MMC               | 20                         | 33.38                         | 2                     |
| WT                   | B43                   | MMC               | 20                         | 45.85                         | 1                     |
| L2587F               | B43                   | MMC               | 40                         | 7.29                          | 1                     |
| L2587F               | B43                   | MMC               | 40                         | 5.58                          | 2                     |
| WT                   | B43                   | MMC               | 40                         | 20.59                         | 1                     |
| L2587F               | B43                   | MMC               | 60                         | 2.72                          | 1                     |
| L2587F               | B43                   | MMC               | 60                         | 1.49                          | 2                     |
| WT                   | B43                   | MMC               | 60                         | 5.10                          | 1                     |
| L2587F               | B43                   | MMC               | 80                         | 1.46                          | 1                     |
| L2587F               | B43                   | MMC               | 80                         | 1.17                          | 2                     |
| WT                   | B43                   | MMC               | 80                         | 3.43                          | 1                     |
| L2587F               | B43                   | Cisp              | 0.2                        | 66.56                         | 1                     |
| L2587F               | B43                   | Cisp              | 0.2                        | 76.50                         | 2                     |
| WT                   | B43                   | Cisp              | 0.2                        | 67.49                         | 1                     |
| L2587F               | B43                   | Cisp              | 0.4                        | 41.49                         | 1                     |
| L2587F               | B43                   | Cisp              | 0.4                        | 38.22                         | 2                     |
| WT                   | B43                   | Cisp              | 0.4                        | 48.92                         | 1                     |
| L2587F               | B43                   | Cisp              | 0.6                        | 21.13                         | 1                     |
| L2587F               | B43                   | Cisp              | 0.6                        | 21.00                         | 2                     |
| WT                   | B43                   | Cisp              | 0.6                        | 31.79                         | 1                     |
| L2587F               | B43                   | Cisp              | 1                          | 4.56                          | 1                     |
| L2587F               | B43                   | Cisp              | 1                          | 2.20                          | 2                     |
| WT                   | B43                   | Cisp              | 1                          | 11.37                         | 1                     |
| L2587F               | B43                   | Cisp              | 1.2                        | 2.28                          | 1                     |
| L2587F               | B43                   | Cisp              | 1.2                        | 1.00                          | 2                     |
| WT                   | B43                   | Cisp              | 1.2                        | 7.51                          | 1                     |
| L2587F               | B43                   | Cisp              | 1.5                        | 1.97                          | 1                     |
| L2587F               | B43                   | Cisp              | 1.5                        | 1.00                          | 2                     |
| WT                   | B43                   | Cisp              | 1.5                        | 5.20                          | 1                     |
| L2587F               | B43                   | MMS               | 5                          | 99.65                         | 1                     |
| L2587F               | B43                   | MMS               | 5                          | 100.00                        | 2                     |

| Variant <sup>a</sup> | Batch ID <sup>b</sup> | Drug <sup>c</sup> | Concentration <sup>d</sup> | Percent Survived <sup>e</sup> | Clone ID <sup>f</sup> |
|----------------------|-----------------------|-------------------|----------------------------|-------------------------------|-----------------------|
| WT                   | B43                   | MMS               | 5                          | 95.15                         | 1                     |
| L2587F               | B43                   | MMS               | 10                         | 88.24                         | 1                     |
| L2587F               | B43                   | MMS               | 10                         | 93.21                         | 2                     |
| WT                   | B43                   | MMS               | 10                         | 83.60                         | 1                     |
| L2587F               | B43                   | MMS               | 15                         | 58.27                         | 1                     |
| L2587F               | B43                   | MMS               | 15                         | 70.26                         | 2                     |
| WT                   | B43                   | MMS               | 15                         | 80.44                         | 1                     |
| L2587F               | B43                   | MMS               | 20                         | 21.75                         | 1                     |
| L2587F               | B43                   | MMS               | 20                         | 37.94                         | 2                     |
| WT                   | B43                   | MMS               | 20                         | 57.75                         | 1                     |
| L2587F               | B43                   | MMS               | 30                         | 1.00                          | 1                     |
| L2587F               | B43                   | MMS               | 30                         | 1.66                          | 2                     |
| WT                   | B43                   | MMS               | 30                         | 6.59                          | 1                     |
| L2587F               | B43                   | MMS               | 40                         | 1.00                          | 1                     |
| L2587F               | B43                   | MMS               | 40                         | 1.00                          | 2                     |
| WT                   | B43                   | MMS               | 40                         | 1.73                          | 1                     |
| L2587F               | B43                   | Parp              | 0.01                       | 73.40                         | 1                     |
| L2587F               | B43                   | Parp              | 0.01                       | 93.79                         | 2                     |
| WT                   | B43                   | Parp              | 0.01                       | 82.98                         | 1                     |
| L2587F               | B43                   | Parp              | 0.1                        | 38.59                         | 1                     |
| L2587F               | B43                   | Parp              | 0.1                        | 44.12                         | 2                     |
| WT                   | B43                   | Parp              | 0.1                        | 48.32                         | 1                     |
| L2587F               | B43                   | Parp              | 1                          | 1.00                          | 1                     |
| L2587F               | B43                   | Parp              | 1                          | 1.00                          | 2                     |
| WT                   | B43                   | Parp              | 1                          | 1.00                          | 1                     |
| L2587F               | B43                   | Parp              | 10                         | 1.00                          | 1                     |
| L2587F               | B43                   | Parp              | 10                         | 1.00                          | 2                     |
| WT                   | B43                   | Parp              | 10                         | 1.37                          | 1                     |
| L2587F               | B43                   | IR                | 50                         | 87.16                         | 1                     |
| L2587F               | B43                   | IR                | 50                         | 81.99                         | 2                     |
| WT                   | B43                   | IR                | 50                         | 80.37                         | 1                     |
| L2587F               | B43                   | IR                | 100                        | 76.37                         | 1                     |
| L2587F               | B43                   | IR                | 100                        | 83.34                         | 2                     |
| WT                   | B43                   | IR                | 100                        | 67.18                         | 1                     |
| L2587F               | B43                   | IR                | 200                        | 69.46                         | 1                     |
| L2587F               | B43                   | IR                | 200                        | 64.92                         | 2                     |
| WT                   | B43                   | IR                | 200                        | 60.54                         | 1                     |
| L2587F               | B43                   | IR                | 400                        | 40.21                         | 1                     |
| L2587F               | B43                   | IR                | 400                        | 35.86                         | 2                     |
| WT                   | B43                   | IR                | 400                        | 41.64                         | 1                     |

| Variant <sup>a</sup> | Batch ID <sup>b</sup> | Drug <sup>c</sup> | Concentration <sup>d</sup> | Percent Survived <sup>e</sup> | Clone ID <sup>f</sup> |
|----------------------|-----------------------|-------------------|----------------------------|-------------------------------|-----------------------|
| L2587F               | B43                   | IR                | 600                        | 25.19                         | 1                     |
| L2587F               | B43                   | IR                | 600                        | 30.93                         | 2                     |
| WT                   | B43                   | IR                | 600                        | 30.94                         | 1                     |
| N986S                | B44                   | Camp              | 2.5                        | 96.25                         | 1                     |
| N986S                | B44                   | Camp              | 2.5                        | 100.00                        | 2                     |
| WT                   | B44                   | Camp              | 2.5                        | 100.00                        | 1                     |
| N986S                | B44                   | Camp              | 5                          | 97.42                         | 1                     |
| N986S                | B44                   | Camp              | 5                          | 96.63                         | 2                     |
| WT                   | B44                   | Camp              | 5                          | 97.28                         | 1                     |
| N986S                | B44                   | Camp              | 25                         | 88.34                         | 1                     |
| N986S                | B44                   | Camp              | 25                         | 77.56                         | 2                     |
| WT                   | B44                   | Camp              | 25                         | 96.28                         | 1                     |
| N986S                | B44                   | Camp              | 50                         | 76.12                         | 1                     |
| N986S                | B44                   | Camp              | 50                         | 66.25                         | 2                     |
| WT                   | B44                   | Camp              | 50                         | 80.04                         | 1                     |
| N986S                | B44                   | Camp              | 100                        | 50.89                         | 1                     |
| N986S                | B44                   | Camp              | 100                        | 39.80                         | 2                     |
| WT                   | B44                   | Camp              | 100                        | 52.07                         | 1                     |
| N986S                | B44                   | Camp              | 200                        | 12.03                         | 1                     |
| N986S                | B44                   | Camp              | 200                        | 3.11                          | 2                     |
| WT                   | B44                   | Camp              | 200                        | 14.14                         | 1                     |
| N986S                | B44                   | MMC               | 5                          | 82.22                         | 1                     |
| N986S                | B44                   | MMC               | 5                          | 87.03                         | 2                     |
| WT                   | B44                   | MMC               | 5                          | 80.27                         | 1                     |
| N986S                | B44                   | MMC               | 10                         | 50.82                         | 1                     |
| N986S                | B44                   | MMC               | 10                         | 67.01                         | 2                     |
| WT                   | B44                   | MMC               | 10                         | 65.97                         | 1                     |
| N986S                | B44                   | MMC               | 20                         | 33.72                         | 1                     |
| N986S                | B44                   | MMC               | 20                         | 42.33                         | 2                     |
| WT                   | B44                   | MMC               | 20                         | 45.85                         | 1                     |
| N986S                | B44                   | MMC               | 40                         | 15.70                         | 1                     |
| N986S                | B44                   | MMC               | 40                         | 11.72                         | 2                     |
| WT                   | B44                   | MMC               | 40                         | 20.59                         | 1                     |
| N986S                | B44                   | MMC               | 60                         | 2.14                          | 1                     |
| N986S                | B44                   | MMC               | 60                         | 2.58                          | 2                     |
| WT                   | B44                   | MMC               | 60                         | 5.10                          | 1                     |
| N986S                | B44                   | MMC               | 80                         | 1.00                          | 1                     |
| N986S                | B44                   | MMC               | 80                         | 1.42                          | 2                     |
| WT                   | B44                   | MMC               | 80                         | 3.43                          | 1                     |
| N986S                | B44                   | Cisp              | 0.2                        | 58.71                         | 1                     |

| Variant <sup>a</sup> | Batch ID <sup>b</sup> | Drug <sup>c</sup> | Concentration <sup>d</sup> | Percent Survived <sup>e</sup> | Clone ID <sup>f</sup> |
|----------------------|-----------------------|-------------------|----------------------------|-------------------------------|-----------------------|
| N986S                | B44                   | Cisp              | 0.2                        | 71.83                         | 2                     |
| WT                   | B44                   | Cisp              | 0.2                        | 67.49                         | 1                     |
| N986S                | B44                   | Cisp              | 0.4                        | 36.88                         | 1                     |
| N986S                | B44                   | Cisp              | 0.4                        | 43.86                         | 2                     |
| WT                   | B44                   | Cisp              | 0.4                        | 48.92                         | 1                     |
| N986S                | B44                   | Cisp              | 0.6                        | 16.21                         | 1                     |
| N986S                | B44                   | Cisp              | 0.6                        | 22.37                         | 2                     |
| WT                   | B44                   | Cisp              | 0.6                        | 31.79                         | 1                     |
| N986S                | B44                   | Cisp              | 1                          | 3.76                          | 1                     |
| N986S                | B44                   | Cisp              | 1                          | 5.59                          | 2                     |
| WT                   | B44                   | Cisp              | 1                          | 11.37                         | 1                     |
| N986S                | B44                   | Cisp              | 1.2                        | 1.68                          | 1                     |
| N986S                | B44                   | Cisp              | 1.2                        | 2.42                          | 2                     |
| WT                   | B44                   | Cisp              | 1.2                        | 7.51                          | 1                     |
| N986S                | B44                   | Cisp              | 1.5                        | 1.27                          | 1                     |
| N986S                | B44                   | Cisp              | 1.5                        | 1.50                          | 2                     |
| WT                   | B44                   | Cisp              | 1.5                        | 5.20                          | 1                     |
| N986S                | B44                   | MMS               | 5                          | 98.26                         | 1                     |
| N986S                | B44                   | MMS               | 5                          | 100.00                        | 2                     |
| WT                   | B44                   | MMS               | 5                          | 95.15                         | 1                     |
| N986S                | B44                   | MMS               | 10                         | 82.84                         | 1                     |
| N986S                | B44                   | MMS               | 10                         | 89.61                         | 2                     |
| WT                   | B44                   | MMS               | 10                         | 83.60                         | 1                     |
| N986S                | B44                   | MMS               | 15                         | 61.28                         | 1                     |
| N986S                | B44                   | MMS               | 15                         | 66.94                         | 2                     |
| WT                   | B44                   | MMS               | 15                         | 80.44                         | 1                     |
| N986S                | B44                   | MMS               | 20                         | 35.01                         | 1                     |
| N986S                | B44                   | MMS               | 20                         | 39.81                         | 2                     |
| WT                   | B44                   | MMS               | 20                         | 57.75                         | 1                     |
| N986S                | B44                   | MMS               | 30                         | 5.28                          | 1                     |
| N986S                | B44                   | MMS               | 30                         | 3.10                          | 2                     |
| WT                   | B44                   | MMS               | 30                         | 6.59                          | 1                     |
| N986S                | B44                   | MMS               | 40                         | 1.10                          | 1                     |
| N986S                | B44                   | MMS               | 40                         | 1.00                          | 2                     |
| WT                   | B44                   | MMS               | 40                         | 1.73                          | 1                     |
| N986S                | B44                   | Parp              | 0.01                       | 57.15                         | 1                     |
| N986S                | B44                   | Parp              | 0.01                       | 77.17                         | 2                     |
| WT                   | B44                   | Parp              | 0.01                       | 82.98                         | 1                     |
| N986S                | B44                   | Parp              | 0.1                        | 7.83                          | 1                     |
| N986S                | B44                   | Parp              | 0.1                        | 51.69                         | 2                     |

| Variant <sup>a</sup> | Batch ID <sup>b</sup> | Drug <sup>c</sup> | Concentration <sup>d</sup> | Percent Survived <sup>e</sup> | Clone ID <sup>f</sup> |
|----------------------|-----------------------|-------------------|----------------------------|-------------------------------|-----------------------|
| WT                   | B44                   | Parp              | 0.1                        | 48.32                         | 1                     |
| N986S                | B44                   | Parp              | 1                          | 1.00                          | 1                     |
| N986S                | B44                   | Parp              | 1                          | 3.25                          | 2                     |
| WT                   | B44                   | Parp              | 1                          | 1.00                          | 1                     |
| N986S                | B44                   | Parp              | 10                         | 1.00                          | 1                     |
| N986S                | B44                   | Parp              | 10                         | 1.00                          | 2                     |
| WT                   | B44                   | Parp              | 10                         | 1.37                          | 1                     |
| N986S                | B44                   | IR                | 50                         | 100.00                        | 1                     |
| N986S                | B44                   | IR                | 50                         | 92.06                         | 2                     |
| WT                   | B44                   | IR                | 50                         | 80.37                         | 1                     |
| N986S                | B44                   | IR                | 100                        | 91.71                         | 1                     |
| N986S                | B44                   | IR                | 100                        | 79.59                         | 2                     |
| WT                   | B44                   | IR                | 100                        | 67.18                         | 1                     |
| N986S                | B44                   | IR                | 200                        | 80.45                         | 1                     |
| N986S                | B44                   | IR                | 200                        | 70.11                         | 2                     |
| WT                   | B44                   | IR                | 200                        | 60.54                         | 1                     |
| N986S                | B44                   | IR                | 400                        | 35.34                         | 1                     |
| N986S                | B44                   | IR                | 400                        | 33.68                         | 2                     |
| WT                   | B44                   | IR                | 400                        | 41.64                         | 1                     |
| N986S                | B44                   | IR                | 600                        | 26.90                         | 1                     |
| N986S                | B44                   | IR                | 600                        | 23.54                         | 2                     |
| WT                   | B44                   | IR                | 600                        | 30.94                         | 1                     |
| W2788S               | B45                   | Camp              | 2.5                        | 88.00                         | 1                     |
| W2788S               | B45                   | Camp              | 2.5                        | 79.00                         | 2                     |
| WT                   | B45                   | Camp              | 2.5                        | 100.00                        | 1                     |
| W2788S               | B45                   | Camp              | 5                          | 82.00                         | 1                     |
| W2788S               | B45                   | Camp              | 5                          | 71.00                         | 2                     |
| WT                   | B45                   | Camp              | 5                          | 100.00                        | 1                     |
| W2788S               | B45                   | Camp              | 25                         | 42.00                         | 1                     |
| W2788S               | B45                   | Camp              | 25                         | 10.00                         | 2                     |
| WT                   | B45                   | Camp              | 25                         | 100.00                        | 1                     |
| W2788S               | B45                   | Camp              | 50                         | 13.00                         | 1                     |
| W2788S               | B45                   | Camp              | 50                         | 5.00                          | 2                     |
| WT                   | B45                   | Camp              | 50                         | 78.00                         | 1                     |
| W2788S               | B45                   | Camp              | 100                        | 5.00                          | 1                     |
| W2788S               | B45                   | Camp              | 100                        | 4.00                          | 2                     |
| WT                   | B45                   | Camp              | 100                        | 22.00                         | 1                     |
| W2788S               | B45                   | Camp              | 200                        | 4.00                          | 1                     |
| W2788S               | B45                   | Camp              | 200                        | 5.00                          | 2                     |
| WT                   | B45                   | Camp              | 200                        | 5.00                          | 1                     |

| Variant <sup>a</sup> | Batch ID <sup>b</sup> | Drug <sup>c</sup> | Concentration <sup>d</sup> | Percent Survived <sup>e</sup> | Clone ID <sup>f</sup> |
|----------------------|-----------------------|-------------------|----------------------------|-------------------------------|-----------------------|
| W2788S               | B45                   | MMC               | 5                          | 64.00                         | 1                     |
| W2788S               | B45                   | MMC               | 5                          | 42.00                         | 2                     |
| WT                   | B45                   | MMC               | 5                          | 95.00                         | 1                     |
| W2788S               | B45                   | MMC               | 10                         | 45.00                         | 1                     |
| W2788S               | B45                   | MMC               | 10                         | 12.00                         | 2                     |
| WT                   | B45                   | MMC               | 10                         | 90.00                         | 1                     |
| W2788S               | B45                   | MMC               | 20                         | 29.00                         | 1                     |
| W2788S               | B45                   | MMC               | 20                         | 5.00                          | 2                     |
| WT                   | B45                   | MMC               | 20                         | 84.00                         | 1                     |
| W2788S               | B45                   | MMC               | 40                         | 10.00                         | 1                     |
| W2788S               | B45                   | MMC               | 40                         | 4.00                          | 2                     |
| WT                   | B45                   | MMC               | 40                         | 58.00                         | 1                     |
| W2788S               | B45                   | MMC               | 60                         | 7.00                          | 1                     |
| W2788S               | B45                   | MMC               | 60                         | 3.00                          | 2                     |
| WT                   | B45                   | MMC               | 60                         | 36.00                         | 1                     |
| W2788S               | B45                   | MMC               | 80                         | 6.00                          | 1                     |
| W2788S               | B45                   | MMC               | 80                         | 4.00                          | 2                     |
| WT                   | B45                   | MMC               | 80                         | 17.00                         | 1                     |
| W2788S               | B45                   | Cisp              | 0.2                        | 40.00                         | 1                     |
| W2788S               | B45                   | Cisp              | 0.2                        | 13.00                         | 2                     |
| WT                   | B45                   | Cisp              | 0.2                        | 74.00                         | 1                     |
| W2788S               | B45                   | Cisp              | 0.4                        | 13.00                         | 1                     |
| W2788S               | B45                   | Cisp              | 0.4                        | 6.00                          | 2                     |
| WT                   | B45                   | Cisp              | 0.4                        | 60.00                         | 1                     |
| W2788S               | B45                   | Cisp              | 0.6                        | 8.00                          | 1                     |
| W2788S               | B45                   | Cisp              | 0.6                        | 5.00                          | 2                     |
| WT                   | B45                   | Cisp              | 0.6                        | 43.00                         | 1                     |
| W2788S               | B45                   | Cisp              | 1                          | 6.00                          | 1                     |
| W2788S               | B45                   | Cisp              | 1                          | 4.00                          | 2                     |
| WT                   | B45                   | Cisp              | 1                          | 16.00                         | 1                     |
| W2788S               | B45                   | Cisp              | 1.2                        | 4.00                          | 1                     |
| W2788S               | B45                   | Cisp              | 1.2                        | 2.00                          | 2                     |
| WT                   | B45                   | Cisp              | 1.2                        | 10.00                         | 1                     |
| W2788S               | B45                   | Cisp              | 1.5                        | 5.00                          | 1                     |
| W2788S               | B45                   | Cisp              | 1.5                        | 2.00                          | 2                     |
| WT                   | B45                   | Cisp              | 1.5                        | 6.00                          | 1                     |
| W2788S               | B45                   | MMS               | 5                          | 87.00                         | 1                     |
| W2788S               | B45                   | MMS               | 5                          | 54.00                         | 2                     |
| WT                   | B45                   | MMS               | 5                          | 100.00                        | 1                     |
| W2788S               | B45                   | MMS               | 10                         | 46.00                         | 1                     |

| Variant <sup>a</sup> | Batch ID <sup>b</sup> | Drug <sup>c</sup> | Concentration <sup>d</sup> | Percent Survived <sup>e</sup> | Clone ID <sup>f</sup> |
|----------------------|-----------------------|-------------------|----------------------------|-------------------------------|-----------------------|
| W2788S               | B45                   | MMS               | 10                         | 11.00                         | 2                     |
| WT                   | B45                   | MMS               | 10                         | 100.00                        | 1                     |
| W2788S               | B45                   | MMS               | 15                         | 16.00                         | 1                     |
| W2788S               | B45                   | MMS               | 15                         | 5.00                          | 2                     |
| WT                   | B45                   | MMS               | 15                         | 100.00                        | 1                     |
| W2788S               | B45                   | MMS               | 20                         | 6.00                          | 1                     |
| W2788S               | B45                   | MMS               | 20                         | 3.00                          | 2                     |
| WT                   | B45                   | MMS               | 20                         | 84.00                         | 1                     |
| W2788S               | B45                   | MMS               | 30                         | 1.00                          | 1                     |
| W2788S               | B45                   | MMS               | 30                         | 1.00                          | 2                     |
| WT                   | B45                   | MMS               | 30                         | 26.00                         | 1                     |
| W2788S               | B45                   | MMS               | 40                         | 2.00                          | 1                     |
| W2788S               | B45                   | MMS               | 40                         | 1.00                          | 2                     |
| WT                   | B45                   | MMS               | 40                         | 8.00                          | 1                     |
| W2788S               | B45                   | Parp              | 0.01                       | 66.00                         | 1                     |
| W2788S               | B45                   | Parp              | 0.01                       | 38.00                         | 2                     |
| WT                   | B45                   | Parp              | 0.01                       | 100.00                        | 1                     |
| W2788S               | B45                   | Parp              | 0.1                        | 16.00                         | 1                     |
| W2788S               | B45                   | Parp              | 0.1                        | 7.00                          | 2                     |
| WT                   | B45                   | Parp              | 0.1                        | 89.00                         | 1                     |
| W2788S               | B45                   | Parp              | 1                          | 6.00                          | 1                     |
| W2788S               | B45                   | Parp              | 1                          | 6.00                          | 2                     |
| WT                   | B45                   | Parp              | 1                          | 71.00                         | 1                     |
| W2788S               | B45                   | Parp              | 10                         | 5.00                          | 1                     |
| W2788S               | B45                   | Parp              | 10                         | 4.00                          | 2                     |
| WT                   | B45                   | Parp              | 10                         | 6.00                          | 1                     |
| W2788S               | B45                   | IR                | 50                         | 83.47                         | 1                     |
| W2788S               | B45                   | IR                | 50                         | 69.32                         | 2                     |
| WT                   | B45                   | IR                | 50                         | 80.51                         | 1                     |
| W2788S               | B45                   | IR                | 100                        | 71.14                         | 1                     |
| W2788S               | B45                   | IR                | 100                        | 74.67                         | 2                     |
| WT                   | B45                   | IR                | 100                        | 73.32                         | 1                     |
| W2788S               | B45                   | IR                | 200                        | 54.37                         | 1                     |
| W2788S               | B45                   | IR                | 200                        | 55.05                         | 2                     |
| WT                   | B45                   | IR                | 200                        | 78.57                         | 1                     |
| W2788S               | B45                   | IR                | 400                        | 47.78                         | 1                     |
| W2788S               | B45                   | IR                | 400                        | 22.59                         | 2                     |
| WT                   | B45                   | IR                | 400                        | 53.73                         | 1                     |
| W2788S               | B45                   | IR                | 600                        | 21.80                         | 1                     |
| W2788S               | B45                   | IR                | 600                        | 18.67                         | 2                     |



| Variant <sup>a</sup> | Batch ID <sup>b</sup> | Drug <sup>c</sup> | Concentration <sup>d</sup> | Percent Survived <sup>e</sup> | Clone ID <sup>f</sup> |
|----------------------|-----------------------|-------------------|----------------------------|-------------------------------|-----------------------|
| WT                   | B45                   | IR                | 600                        | 38.97                         | 1                     |
| R2784W               | B46                   | Camp              | 2.5                        | 100.00                        | 1                     |
| R2784W               | B46                   | Camp              | 2.5                        | 100.00                        | 2                     |
| WT                   | B46                   | Camp              | 2.5                        | 100.00                        | 1                     |
| R2784W               | B46                   | Camp              | 5                          | 99.00                         | 1                     |
| R2784W               | B46                   | Camp              | 5                          | 100.00                        | 2                     |
| WT                   | B46                   | Camp              | 5                          | 100.00                        | 1                     |
| R2784W               | B46                   | Camp              | 25                         | 28.00                         | 1                     |
| R2784W               | B46                   | Camp              | 25                         | 65.00                         | 2                     |
| WT                   | B46                   | Camp              | 25                         | 100.00                        | 1                     |
| R2784W               | B46                   | Camp              | 50                         | 7.00                          | 1                     |
| R2784W               | B46                   | Camp              | 50                         | 19.00                         | 2                     |
| WT                   | B46                   | Camp              | 50                         | 78.00                         | 1                     |
| R2784W               | B46                   | Camp              | 100                        | 2.00                          | 1                     |
| R2784W               | B46                   | Camp              | 100                        | 3.00                          | 2                     |
| WT                   | B46                   | Camp              | 100                        | 22.00                         | 1                     |
| R2784W               | B46                   | Camp              | 200                        | 3.00                          | 1                     |
| R2784W               | B46                   | Camp              | 200                        | 1.00                          | 2                     |
| WT                   | B46                   | Camp              | 200                        | 5.00                          | 1                     |
| R2784W               | B46                   | MMC               | 5                          | 70.00                         | 1                     |
| R2784W               | B46                   | MMC               | 5                          | 68.00                         | 2                     |
| WT                   | B46                   | MMC               | 5                          | 95.00                         | 1                     |
| R2784W               | B46                   | MMC               | 10                         | 42.00                         | 1                     |
| R2784W               | B46                   | MMC               | 10                         | 50.00                         | 2                     |
| WT                   | B46                   | MMC               | 10                         | 90.00                         | 1                     |
| R2784W               | B46                   | MMC               | 20                         | 19.00                         | 1                     |
| R2784W               | B46                   | MMC               | 20                         | 25.00                         | 2                     |
| WT                   | B46                   | MMC               | 20                         | 84.00                         | 1                     |
| R2784W               | B46                   | MMC               | 40                         | 7.00                          | 1                     |
| R2784W               | B46                   | MMC               | 40                         | 7.00                          | 2                     |
| WT                   | B46                   | MMC               | 40                         | 58.00                         | 1                     |
| R2784W               | B46                   | MMC               | 60                         | 5.00                          | 1                     |
| R2784W               | B46                   | MMC               | 60                         | 3.00                          | 2                     |
| WT                   | B46                   | MMC               | 60                         | 36.00                         | 1                     |
| R2784W               | B46                   | MMC               | 80                         | 4.00                          | 1                     |
| R2784W               | B46                   | MMC               | 80                         | 3.00                          | 2                     |
| WT                   | B46                   | MMC               | 80                         | 17.00                         | 1                     |
| R2784W               | B46                   | Cisp              | 0.2                        | 18.00                         | 1                     |
| R2784W               | B46                   | Cisp              | 0.2                        | 51.00                         | 2                     |
| WT                   | B46                   | Cisp              | 0.2                        | 74.00                         | 1                     |

| Variant <sup>a</sup> | Batch ID <sup>b</sup> | Drug <sup>c</sup> | Concentration <sup>d</sup> | Percent Survived <sup>e</sup> | Clone ID <sup>f</sup> |
|----------------------|-----------------------|-------------------|----------------------------|-------------------------------|-----------------------|
| R2784W               | B46                   | Cisp              | 0.4                        | 8.00                          | 1                     |
| R2784W               | B46                   | Cisp              | 0.4                        | 16.00                         | 2                     |
| WT                   | B46                   | Cisp              | 0.4                        | 60.00                         | 1                     |
| R2784W               | B46                   | Cisp              | 0.6                        | 6.00                          | 1                     |
| R2784W               | B46                   | Cisp              | 0.6                        | 9.00                          | 2                     |
| WT                   | B46                   | Cisp              | 0.6                        | 43.00                         | 1                     |
| R2784W               | B46                   | Cisp              | 1                          | 4.00                          | 1                     |
| R2784W               | B46                   | Cisp              | 1                          | 4.00                          | 2                     |
| WT                   | B46                   | Cisp              | 1                          | 16.00                         | 1                     |
| R2784W               | B46                   | Cisp              | 1.2                        | 3.00                          | 1                     |
| R2784W               | B46                   | Cisp              | 1.2                        | 2.00                          | 2                     |
| WT                   | B46                   | Cisp              | 1.2                        | 10.00                         | 1                     |
| R2784W               | B46                   | Cisp              | 1.5                        | 3.00                          | 1                     |
| R2784W               | B46                   | Cisp              | 1.5                        | 2.00                          | 2                     |
| WT                   | B46                   | Cisp              | 1.5                        | 6.00                          | 1                     |
| R2784W               | B46                   | MMS               | 5                          | 58.00                         | 1                     |
| R2784W               | B46                   | MMS               | 5                          | 100.00                        | 2                     |
| WT                   | B46                   | MMS               | 5                          | 100.00                        | 1                     |
| R2784W               | B46                   | MMS               | 10                         | 16.00                         | 1                     |
| R2784W               | B46                   | MMS               | 10                         | 100.00                        | 2                     |
| WT                   | B46                   | MMS               | 10                         | 100.00                        | 1                     |
| R2784W               | B46                   | MMS               | 15                         | 6.00                          | 1                     |
| R2784W               | B46                   | MMS               | 15                         | 40.00                         | 2                     |
| WT                   | B46                   | MMS               | 15                         | 100.00                        | 1                     |
| R2784W               | B46                   | MMS               | 20                         | 3.00                          | 1                     |
| R2784W               | B46                   | MMS               | 20                         | 11.00                         | 2                     |
| WT                   | B46                   | MMS               | 20                         | 84.00                         | 1                     |
| R2784W               | B46                   | MMS               | 30                         | 1.00                          | 1                     |
| R2784W               | B46                   | MMS               | 30                         | 1.00                          | 2                     |
| WT                   | B46                   | MMS               | 30                         | 26.00                         | 1                     |
| R2784W               | B46                   | MMS               | 40                         | 2.00                          | 1                     |
| R2784W               | B46                   | MMS               | 40                         | 2.00                          | 2                     |
| WT                   | B46                   | MMS               | 40                         | 8.00                          | 1                     |
| R2784W               | B46                   | Parp              | 0.01                       | 61.00                         | 1                     |
| R2784W               | B46                   | Parp              | 0.01                       | 85.00                         | 2                     |
| WT                   | B46                   | Parp              | 0.01                       | 100.00                        | 1                     |
| R2784W               | B46                   | Parp              | 0.1                        | 19.00                         | 1                     |
| R2784W               | B46                   | Parp              | 0.1                        | 19.00                         | 2                     |
| WT                   | B46                   | Parp              | 0.1                        | 89.00                         | 1                     |
| R2784W               | B46                   | Parp              | 1                          | 7.00                          | 1                     |

| Variant <sup>a</sup> | Batch ID <sup>b</sup> | Drug <sup>c</sup> | Concentration <sup>d</sup> | Percent Survived <sup>e</sup> | Clone ID <sup>f</sup> |
|----------------------|-----------------------|-------------------|----------------------------|-------------------------------|-----------------------|
| R2784W               | B46                   | Parp              | 1                          | 7.00                          | 2                     |
| WT                   | B46                   | Parp              | 1                          | 71.00                         | 1                     |
| R2784W               | B46                   | Parp              | 10                         | 6.00                          | 1                     |
| R2784W               | B46                   | Parp              | 10                         | 6.00                          | 2                     |
| WT                   | B46                   | Parp              | 10                         | 6.00                          | 1                     |
| R2784W               | B46                   | IR                | 50                         | 74.90                         | 1                     |
| R2784W               | B46                   | IR                | 50                         | 68.45                         | 2                     |
| WT                   | B46                   | IR                | 50                         | 80.51                         | 1                     |
| R2784W               | B46                   | IR                | 100                        | 62.40                         | 1                     |
| R2784W               | B46                   | IR                | 100                        | 64.00                         | 2                     |
| WT                   | B46                   | IR                | 100                        | 73.32                         | 1                     |
| R2784W               | B46                   | IR                | 200                        | 57.12                         | 1                     |
| R2784W               | B46                   | IR                | 200                        | 50.17                         | 2                     |
| WT                   | B46                   | IR                | 200                        | 78.57                         | 1                     |
| R2784W               | B46                   | IR                | 400                        | 29.41                         | 1                     |
| R2784W               | B46                   | IR                | 400                        | 26.01                         | 2                     |
| WT                   | B46                   | IR                | 400                        | 53.73                         | 1                     |
| R2784W               | B46                   | IR                | 600                        | 29.41                         | 1                     |
| R2784W               | B46                   | IR                | 600                        | 16.50                         | 2                     |
| WT                   | B46                   | IR                | 600                        | 38.97                         | 1                     |
| T1624A               | B47                   | Camp              | 2.5                        | 100.00                        | 1                     |
| T1624A               | B47                   | Camp              | 2.5                        | 100.00                        | 2                     |
| WT                   | B47                   | Camp              | 2.5                        | 100.00                        | 1                     |
| T1624A               | B47                   | Camp              | 5                          | 98.26                         | 1                     |
| T1624A               | B47                   | Camp              | 5                          | 94.98                         | 2                     |
| WT                   | B47                   | Camp              | 5                          | 100.00                        | 1                     |
| T1624A               | B47                   | Camp              | 25                         | 69.37                         | 1                     |
| T1624A               | B47                   | Camp              | 25                         | 79.45                         | 2                     |
| WT                   | B47                   | Camp              | 25                         | 97.14                         | 1                     |
| T1624A               | B47                   | Camp              | 50                         | 31.88                         | 1                     |
| T1624A               | B47                   | Camp              | 50                         | 29.79                         | 2                     |
| WT                   | B47                   | Camp              | 50                         | 60.48                         | 1                     |
| T1624A               | B47                   | Camp              | 100                        | 7.34                          | 1                     |
| T1624A               | B47                   | Camp              | 100                        | 6.96                          | 2                     |
| WT                   | B47                   | Camp              | 100                        | 11.75                         | 1                     |
| T1624A               | B47                   | Camp              | 200                        | 3.86                          | 1                     |
| T1624A               | B47                   | Camp              | 200                        | 4.00                          | 2                     |
| WT                   | B47                   | Camp              | 200                        | 5.08                          | 1                     |
| T1624A               | B47                   | MMC               | 5                          | 90.57                         | 1                     |
| T1624A               | B47                   | MMC               | 5                          | 80.81                         | 2                     |

| Variant <sup>a</sup> | Batch ID <sup>b</sup> | Drug <sup>c</sup> | Concentration <sup>d</sup> | Percent Survived <sup>e</sup> | Clone ID <sup>f</sup> |
|----------------------|-----------------------|-------------------|----------------------------|-------------------------------|-----------------------|
| WT                   | B47                   | MMC               | 5                          | 97.81                         | 1                     |
| T1624A               | B47                   | MMC               | 10                         | 72.36                         | 1                     |
| T1624A               | B47                   | MMC               | 10                         | 75.76                         | 2                     |
| WT                   | B47                   | MMC               | 10                         | 100.00                        | 1                     |
| T1624A               | B47                   | MMC               | 20                         | 48.83                         | 1                     |
| T1624A               | B47                   | MMC               | 20                         | 51.40                         | 2                     |
| WT                   | B47                   | MMC               | 20                         | 89.83                         | 1                     |
| T1624A               | B47                   | MMC               | 40                         | 18.42                         | 1                     |
| T1624A               | B47                   | MMC               | 40                         | 24.24                         | 2                     |
| WT                   | B47                   | MMC               | 40                         | 57.80                         | 1                     |
| T1624A               | B47                   | MMC               | 60                         | 8.77                          | 1                     |
| T1624A               | B47                   | MMC               | 60                         | 14.25                         | 2                     |
| WT                   | B47                   | MMC               | 60                         | 28.94                         | 1                     |
| T1624A               | B47                   | MMC               | 80                         | 6.44                          | 1                     |
| T1624A               | B47                   | MMC               | 80                         | 8.08                          | 2                     |
| WT                   | B47                   | MMC               | 80                         | 17.33                         | 1                     |
| T1624A               | B47                   | Cisp              | 0.2                        | 70.78                         | 1                     |
| T1624A               | B47                   | Cisp              | 0.2                        | 71.25                         | 2                     |
| WT                   | B47                   | Cisp              | 0.2                        | 92.48                         | 1                     |
| T1624A               | B47                   | Cisp              | 0.4                        | 35.13                         | 1                     |
| T1624A               | B47                   | Cisp              | 0.4                        | 42.01                         | 2                     |
| WT                   | B47                   | Cisp              | 0.4                        | 77.35                         | 1                     |
| T1624A               | B47                   | Cisp              | 0.6                        | 17.51                         | 1                     |
| T1624A               | B47                   | Cisp              | 0.6                        | 21.69                         | 2                     |
| WT                   | B47                   | Cisp              | 0.6                        | 45.67                         | 1                     |
| T1624A               | B47                   | Cisp              | 1                          | 7.56                          | 1                     |
| T1624A               | B47                   | Cisp              | 1                          | 11.40                         | 2                     |
| WT                   | B47                   | Cisp              | 1                          | 26.94                         | 1                     |
| T1624A               | B47                   | Cisp              | 1.2                        | 5.39                          | 1                     |
| T1624A               | B47                   | Cisp              | 1.2                        | 6.57                          | 2                     |
| WT                   | B47                   | Cisp              | 1.2                        | 13.02                         | 1                     |
| T1624A               | B47                   | Cisp              | 1.5                        | 4.87                          | 1                     |
| T1624A               | B47                   | Cisp              | 1.5                        | 7.56                          | 2                     |
| WT                   | B47                   | Cisp              | 1.5                        | 6.77                          | 1                     |
| T1624A               | B47                   | MMS               | 5                          | 85.10                         | 1                     |
| T1624A               | B47                   | MMS               | 5                          | 77.82                         | 2                     |
| WT                   | B47                   | MMS               | 5                          | 100.00                        | 1                     |
| T1624A               | B47                   | MMS               | 10                         | 59.79                         | 1                     |
| T1624A               | B47                   | MMS               | 10                         | 42.94                         | 2                     |
| WT                   | B47                   | MMS               | 10                         | 100.00                        | 1                     |

| Variant <sup>a</sup> | Batch ID <sup>b</sup> | Drug <sup>c</sup> | Concentration <sup>d</sup> | Percent Survived <sup>e</sup> | Clone ID <sup>f</sup> |
|----------------------|-----------------------|-------------------|----------------------------|-------------------------------|-----------------------|
| T1624A               | B47                   | MMS               | 15                         | 32.54                         | 1                     |
| T1624A               | B47                   | MMS               | 15                         | 27.22                         | 2                     |
| WT                   | B47                   | MMS               | 15                         | 84.68                         | 1                     |
| T1624A               | B47                   | MMS               | 20                         | 13.23                         | 1                     |
| T1624A               | B47                   | MMS               | 20                         | 15.83                         | 2                     |
| WT                   | B47                   | MMS               | 20                         | 61.26                         | 1                     |
| T1624A               | B47                   | MMS               | 30                         | 2.56                          | 1                     |
| T1624A               | B47                   | MMS               | 30                         | 2.62                          | 2                     |
| WT                   | B47                   | MMS               | 30                         | 15.32                         | 1                     |
| T1624A               | B47                   | MMS               | 40                         | 1.76                          | 1                     |
| T1624A               | B47                   | MMS               | 40                         | 2.12                          | 2                     |
| WT                   | B47                   | MMS               | 40                         | 2.30                          | 1                     |
| T1624A               | B47                   | Parp              | 0.01                       | 88.48                         | 1                     |
| T1624A               | B47                   | Parp              | 0.01                       | 96.93                         | 2                     |
| WT                   | B47                   | Parp              | 0.01                       | 100.00                        | 1                     |
| T1624A               | B47                   | Parp              | 0.1                        | 58.07                         | 1                     |
| T1624A               | B47                   | Parp              | 0.1                        | 62.37                         | 2                     |
| WT                   | B47                   | Parp              | 0.1                        | 100.00                        | 1                     |
| T1624A               | B47                   | Parp              | 1                          | 10.83                         | 1                     |
| T1624A               | B47                   | Parp              | 1                          | 15.75                         | 2                     |
| WT                   | B47                   | Parp              | 1                          | 64.48                         | 1                     |
| T1624A               | B47                   | Parp              | 10                         | 1.77                          | 1                     |
| T1624A               | B47                   | Parp              | 10                         | 3.38                          | 2                     |
| WT                   | B47                   | Parp              | 10                         | 5.02                          | 1                     |
| T1624A               | B47                   | IR                | 50                         | 79.11                         | 1                     |
| T1624A               | B47                   | IR                | 50                         | 70.39                         | 2                     |
| WT                   | B47                   | IR                | 50                         | 86.71                         | 1                     |
| T1624A               | B47                   | IR                | 100                        | 68.63                         | 1                     |
| T1624A               | B47                   | IR                | 100                        | 63.05                         | 2                     |
| WT                   | B47                   | IR                | 100                        | 80.26                         | 1                     |
| T1624A               | B47                   | IR                | 200                        | 54.33                         | 1                     |
| T1624A               | B47                   | IR                | 200                        | 49.21                         | 2                     |
| WT                   | B47                   | IR                | 200                        | 59.28                         | 1                     |
| T1624A               | B47                   | IR                | 400                        | 26.69                         | 1                     |
| T1624A               | B47                   | IR                | 400                        | 29.69                         | 2                     |
| WT                   | B47                   | IR                | 400                        | 46.77                         | 1                     |
| T1624A               | B47                   | IR                | 600                        | 18.35                         | 1                     |
| T1624A               | B47                   | IR                | 600                        | 18.18                         | 2                     |
| WT                   | B47                   | IR                | 600                        | 33.63                         | 1                     |
| L452V                | B48                   | Camp              | 2.5                        | 97.98                         | 1                     |

| Variant <sup>a</sup> | Batch ID <sup>b</sup> | Drug <sup>c</sup> | Concentration <sup>d</sup> | Percent Survived <sup>e</sup> | Clone ID <sup>f</sup> |
|----------------------|-----------------------|-------------------|----------------------------|-------------------------------|-----------------------|
| L452V                | B48                   | Camp              | 2.5                        | 100.00                        | 2                     |
| WT                   | B48                   | Camp              | 2.5                        | 83.11                         | 1                     |
| L452V                | B48                   | Camp              | 5                          | 100.00                        | 1                     |
| L452V                | B48                   | Camp              | 5                          | 100.00                        | 2                     |
| WT                   | B48                   | Camp              | 5                          | 99.29                         | 1                     |
| L452V                | B48                   | Camp              | 25                         | 97.23                         | 1                     |
| L452V                | B48                   | Camp              | 25                         | 94.59                         | 2                     |
| WT                   | B48                   | Camp              | 25                         | 92.74                         | 1                     |
| L452V                | B48                   | Camp              | 50                         | 70.21                         | 1                     |
| L452V                | B48                   | Camp              | 50                         | 57.09                         | 2                     |
| WT                   | B48                   | Camp              | 50                         | 69.85                         | 1                     |
| L452V                | B48                   | Camp              | 100                        | 17.34                         | 1                     |
| L452V                | B48                   | Camp              | 100                        | 3.72                          | 2                     |
| WT                   | B48                   | Camp              | 100                        | 21.07                         | 1                     |
| L452V                | B48                   | Camp              | 200                        | 1.81                          | 1                     |
| L452V                | B48                   | Camp              | 200                        | 1.69                          | 2                     |
| WT                   | B48                   | Camp              | 200                        | 3.79                          | 1                     |
| L452V                | B48                   | MMC               | 5                          | 88.72                         | 1                     |
| L452V                | B48                   | MMC               | 5                          | 68.68                         | 2                     |
| WT                   | B48                   | MMC               | 5                          | 82.15                         | 1                     |
| L452V                | B48                   | MMC               | 10                         | 78.68                         | 1                     |
| L452V                | B48                   | MMC               | 10                         | 59.95                         | 2                     |
| WT                   | B48                   | MMC               | 10                         | 75.74                         | 1                     |
| L452V                | B48                   | MMC               | 20                         | 53.92                         | 1                     |
| L452V                | B48                   | MMC               | 20                         | 38.25                         | 2                     |
| WT                   | B48                   | MMC               | 20                         | 60.53                         | 1                     |
| L452V                | B48                   | MMC               | 40                         | 28.37                         | 1                     |
| L452V                | B48                   | MMC               | 40                         | 14.04                         | 2                     |
| WT                   | B48                   | MMC               | 40                         | 29.70                         | 1                     |
| L452V                | B48                   | MMC               | 60                         | 14.89                         | 1                     |
| L452V                | B48                   | MMC               | 60                         | 3.69                          | 2                     |
| WT                   | B48                   | MMC               | 60                         | 16.01                         | 1                     |
| L452V                | B48                   | MMC               | 80                         | 6.08                          | 1                     |
| L452V                | B48                   | MMC               | 80                         | 1.71                          | 2                     |
| WT                   | B48                   | MMC               | 80                         | 5.76                          | 1                     |
| L452V                | B48                   | Cisp              | 0.2                        | 61.39                         | 1                     |
| L452V                | B48                   | Cisp              | 0.2                        | 57.04                         | 2                     |
| WT                   | B48                   | Cisp              | 0.2                        | 65.70                         | 1                     |
| L452V                | B48                   | Cisp              | 0.4                        | 32.57                         | 1                     |
| L452V                | B48                   | Cisp              | 0.4                        | 31.44                         | 2                     |

| Variant <sup>a</sup> | Batch ID <sup>b</sup> | Drug <sup>c</sup> | Concentration <sup>d</sup> | Percent Survived <sup>e</sup> | Clone ID <sup>f</sup> |
|----------------------|-----------------------|-------------------|----------------------------|-------------------------------|-----------------------|
| WT                   | B48                   | Cisp              | 0.4                        | 40.68                         | 1                     |
| L452V                | B48                   | Cisp              | 0.6                        | 16.01                         | 1                     |
| L452V                | B48                   | Cisp              | 0.6                        | 16.00                         | 2                     |
| WT                   | B48                   | Cisp              | 0.6                        | 27.69                         | 1                     |
| L452V                | B48                   | Cisp              | 1                          | 4.85                          | 1                     |
| L452V                | B48                   | Cisp              | 1                          | 4.32                          | 2                     |
| WT                   | B48                   | Cisp              | 1                          | 6.24                          | 1                     |
| L452V                | B48                   | Cisp              | 1.2                        | 2.56                          | 1                     |
| L452V                | B48                   | Cisp              | 1.2                        | 2.48                          | 2                     |
| WT                   | B48                   | Cisp              | 1.2                        | 4.90                          | 1                     |
| L452V                | B48                   | Cisp              | 1.5                        | 2.10                          | 1                     |
| L452V                | B48                   | Cisp              | 1.5                        | 1.92                          | 2                     |
| WT                   | B48                   | Cisp              | 1.5                        | 4.83                          | 1                     |
| L452V                | B48                   | MMS               | 5                          | 100.00                        | 1                     |
| L452V                | B48                   | MMS               | 5                          | 99.42                         | 2                     |
| WT                   | B48                   | MMS               | 5                          | 100.00                        | 1                     |
| L452V                | B48                   | MMS               | 10                         | 99.49                         | 1                     |
| L452V                | B48                   | MMS               | 10                         | 85.60                         | 2                     |
| WT                   | B48                   | MMS               | 10                         | 100.00                        | 1                     |
| L452V                | B48                   | MMS               | 15                         | 78.04                         | 1                     |
| L452V                | B48                   | MMS               | 15                         | 59.71                         | 2                     |
| WT                   | B48                   | MMS               | 15                         | 72.85                         | 1                     |
| L452V                | B48                   | MMS               | 20                         | 77.32                         | 1                     |
| L452V                | B48                   | MMS               | 20                         | 59.42                         | 2                     |
| WT                   | B48                   | MMS               | 20                         | 62.73                         | 1                     |
| L452V                | B48                   | MMS               | 30                         | 15.93                         | 1                     |
| L452V                | B48                   | MMS               | 30                         | 3.38                          | 2                     |
| WT                   | B48                   | MMS               | 30                         | 17.35                         | 1                     |
| L452V                | B48                   | MMS               | 40                         | 8.17                          | 1                     |
| L452V                | B48                   | MMS               | 40                         | 2.13                          | 2                     |
| WT                   | B48                   | MMS               | 40                         | 6.75                          | 1                     |
| L452V                | B48                   | Parp              | 0.01                       | 55.07                         | 1                     |
| L452V                | B48                   | Parp              | 0.01                       | 54.23                         | 2                     |
| WT                   | B48                   | Parp              | 0.01                       | 80.40                         | 1                     |
| L452V                | B48                   | Parp              | 0.1                        | 20.66                         | 1                     |
| L452V                | B48                   | Parp              | 0.1                        | 16.22                         | 2                     |
| WT                   | B48                   | Parp              | 0.1                        | 54.36                         | 1                     |
| L452V                | B48                   | Parp              | 1                          | 1.00                          | 1                     |
| L452V                | B48                   | Parp              | 1                          | 1.00                          | 2                     |
| WT                   | B48                   | Parp              | 1                          | 1.00                          | 1                     |

| Variant <sup>a</sup> | Batch ID <sup>b</sup> | Drug <sup>c</sup> | Concentration <sup>d</sup> | Percent Survived <sup>e</sup> | Clone ID <sup>f</sup> |
|----------------------|-----------------------|-------------------|----------------------------|-------------------------------|-----------------------|
| L452V                | B48                   | Parp              | 10                         | 1.00                          | 1                     |
| L452V                | B48                   | Parp              | 10                         | 1.00                          | 2                     |
| WT                   | B48                   | Parp              | 10                         | 1.00                          | 1                     |
| L452V                | B48                   | IR                | 50                         | 64.94                         | 1                     |
| L452V                | B48                   | IR                | 50                         | 58.97                         | 2                     |
| WT                   | B48                   | IR                | 50                         | 84.04                         | 1                     |
| L452V                | B48                   | IR                | 100                        | 39.86                         | 1                     |
| L452V                | B48                   | IR                | 100                        | 23.81                         | 2                     |
| WT                   | B48                   | IR                | 100                        | 78.67                         | 1                     |
| L452V                | B48                   | IR                | 200                        | 13.72                         | 1                     |
| L452V                | B48                   | IR                | 200                        | 7.06                          | 2                     |
| WT                   | B48                   | IR                | 200                        | 25.20                         | 1                     |
| L452V                | B48                   | IR                | 400                        | 6.55                          | 1                     |
| L452V                | B48                   | IR                | 400                        | 5.67                          | 2                     |
| WT                   | B48                   | IR                | 400                        | 6.48                          | 1                     |
| L452V                | B48                   | IR                | 600                        | 5.79                          | 1                     |
| L452V                | B48                   | IR                | 600                        | 5.08                          | 2                     |
| WT                   | B48                   | IR                | 600                        | 5.85                          | 1                     |
| N986I                | B49                   | Camp              | 2.5                        | 100.00                        | 1                     |
| N986I                | B49                   | Camp              | 2.5                        | 100.00                        | 2                     |
| WT                   | B49                   | Camp              | 2.5                        | 100.00                        | 1                     |
| N986I                | B49                   | Camp              | 5                          | 100.00                        | 1                     |
| N986I                | B49                   | Camp              | 5                          | 97.57                         | 2                     |
| WT                   | B49                   | Camp              | 5                          | 100.00                        | 1                     |
| N986I                | B49                   | Camp              | 25                         | 75.66                         | 1                     |
| N986I                | B49                   | Camp              | 25                         | 83.83                         | 2                     |
| WT                   | B49                   | Camp              | 25                         | 89.36                         | 1                     |
| N986I                | B49                   | Camp              | 50                         | 59.72                         | 1                     |
| N986I                | B49                   | Camp              | 50                         | 61.70                         | 2                     |
| WT                   | B49                   | Camp              | 50                         | 66.90                         | 1                     |
| N986I                | B49                   | Camp              | 100                        | 10.81                         | 1                     |
| N986I                | B49                   | Camp              | 100                        | 13.01                         | 2                     |
| WT                   | B49                   | Camp              | 100                        | 14.74                         | 1                     |
| N986I                | B49                   | Camp              | 200                        | 6.44                          | 1                     |
| N986I                | B49                   | Camp              | 200                        | 2.04                          | 2                     |
| WT                   | B49                   | Camp              | 200                        | 3.55                          | 1                     |
| N986I                | B49                   | MMC               | 5                          | 95.74                         | 1                     |
| N986I                | B49                   | MMC               | 5                          | 91.55                         | 2                     |
| WT                   | B49                   | MMC               | 5                          | 100.00                        | 1                     |
| N986I                | B49                   | MMC               | 10                         | 100.00                        | 1                     |



| Variant <sup>a</sup> | Batch ID <sup>b</sup> | Drug <sup>c</sup> | Concentration <sup>d</sup> | Percent Survived <sup>e</sup> | Clone ID <sup>f</sup> |
|----------------------|-----------------------|-------------------|----------------------------|-------------------------------|-----------------------|
| N986I                | B49                   | MMC               | 10                         | 100.00                        | 2                     |
| WT                   | B49                   | MMC               | 10                         | 100.00                        | 1                     |
| N986I                | B49                   | MMC               | 20                         | 100.00                        | 1                     |
| N986I                | B49                   | MMC               | 20                         | 100.00                        | 2                     |
| WT                   | B49                   | MMC               | 20                         | 96.73                         | 1                     |
| N986I                | B49                   | MMC               | 40                         | 64.04                         | 1                     |
| N986I                | B49                   | MMC               | 40                         | 48.59                         | 2                     |
| WT                   | B49                   | MMC               | 40                         | 55.16                         | 1                     |
| N986I                | B49                   | MMC               | 60                         | 22.30                         | 1                     |
| N986I                | B49                   | MMC               | 60                         | 16.50                         | 2                     |
| WT                   | B49                   | MMC               | 60                         | 24.19                         | 1                     |
| N986I                | B49                   | MMC               | 80                         | 9.57                          | 1                     |
| N986I                | B49                   | MMC               | 80                         | 5.41                          | 2                     |
| WT                   | B49                   | MMC               | 80                         | 13.51                         | 1                     |
| N986I                | B49                   | Cisp              | 0.2                        | 69.25                         | 1                     |
| N986I                | B49                   | Cisp              | 0.2                        | 67.69                         | 2                     |
| WT                   | B49                   | Cisp              | 0.2                        | 81.42                         | 1                     |
| N986I                | B49                   | Cisp              | 0.4                        | 51.15                         | 1                     |
| N986I                | B49                   | Cisp              | 0.4                        | 49.74                         | 2                     |
| WT                   | B49                   | Cisp              | 0.4                        | 66.27                         | 1                     |
| N986I                | B49                   | Cisp              | 0.6                        | 35.17                         | 1                     |
| N986I                | B49                   | Cisp              | 0.6                        | 27.33                         | 2                     |
| WT                   | B49                   | Cisp              | 0.6                        | 56.26                         | 1                     |
| N986I                | B49                   | Cisp              | 1                          | 17.14                         | 1                     |
| N986I                | B49                   | Cisp              | 1                          | 5.35                          | 2                     |
| WT                   | B49                   | Cisp              | 1                          | 28.47                         | 1                     |
| N986I                | B49                   | Cisp              | 1.2                        | 10.04                         | 1                     |
| N986I                | B49                   | Cisp              | 1.2                        | 3.79                          | 2                     |
| WT                   | B49                   | Cisp              | 1.2                        | 24.52                         | 1                     |
| N986I                | B49                   | Cisp              | 1.5                        | 4.86                          | 1                     |
| N986I                | B49                   | Cisp              | 1.5                        | 1.18                          | 2                     |
| WT                   | B49                   | Cisp              | 1.5                        | 12.64                         | 1                     |
| N986I                | B49                   | MMS               | 5                          | 93.36                         | 1                     |
| N986I                | B49                   | MMS               | 5                          | 100.00                        | 2                     |
| WT                   | B49                   | MMS               | 5                          | 100.00                        | 1                     |
| N986I                | B49                   | MMS               | 10                         | 97.63                         | 1                     |
| N986I                | B49                   | MMS               | 10                         | 100.00                        | 2                     |
| WT                   | B49                   | MMS               | 10                         | 100.00                        | 1                     |
| N986I                | B49                   | MMS               | 15                         | 76.51                         | 1                     |
| N986I                | B49                   | MMS               | 15                         | 100.00                        | 2                     |

| Variant <sup>a</sup> | Batch ID <sup>b</sup> | Drug <sup>c</sup> | Concentration <sup>d</sup> | Percent Survived <sup>e</sup> | Clone ID <sup>f</sup> |
|----------------------|-----------------------|-------------------|----------------------------|-------------------------------|-----------------------|
| WT                   | B49                   | MMS               | 15                         | 100.00                        | 1                     |
| N986I                | B49                   | MMS               | 20                         | 55.57                         | 1                     |
| N986I                | B49                   | MMS               | 20                         | 77.52                         | 2                     |
| WT                   | B49                   | MMS               | 20                         | 100.00                        | 1                     |
| N986I                | B49                   | MMS               | 30                         | 23.66                         | 1                     |
| N986I                | B49                   | MMS               | 30                         | 28.33                         | 2                     |
| WT                   | B49                   | MMS               | 30                         | 49.08                         | 1                     |
| N986I                | B49                   | MMS               | 40                         | 5.77                          | 1                     |
| N986I                | B49                   | MMS               | 40                         | 4.11                          | 2                     |
| WT                   | B49                   | MMS               | 40                         | 9.98                          | 1                     |
| N986I                | B49                   | Parp              | 0.01                       | 100.00                        | 1                     |
| N986I                | B49                   | Parp              | 0.01                       | 94.45                         | 2                     |
| WT                   | B49                   | Parp              | 0.01                       | 90.17                         | 1                     |
| N986I                | B49                   | Parp              | 0.1                        | 89.11                         | 1                     |
| N986I                | B49                   | Parp              | 0.1                        | 89.63                         | 2                     |
| WT                   | B49                   | Parp              | 0.1                        | 94.48                         | 1                     |
| N986I                | B49                   | Parp              | 1                          | 75.06                         | 1                     |
| N986I                | B49                   | Parp              | 1                          | 65.41                         | 2                     |
| WT                   | B49                   | Parp              | 1                          | 72.05                         | 1                     |
| N986I                | B49                   | Parp              | 10                         | 15.28                         | 1                     |
| N986I                | B49                   | Parp              | 10                         | 1.29                          | 2                     |
| WT                   | B49                   | Parp              | 10                         | 16.55                         | 1                     |
| N986I                | B49                   | IR                | 50                         | 86.85                         | 1                     |
| N986I                | B49                   | IR                | 50                         | 70.64                         | 2                     |
| WT                   | B49                   | IR                | 50                         | 73.53                         | 1                     |
| N986I                | B49                   | IR                | 100                        | 98.34                         | 1                     |
| N986I                | B49                   | IR                | 100                        | 59.84                         | 2                     |
| WT                   | B49                   | IR                | 100                        | 52.31                         | 1                     |
| N986I                | B49                   | IR                | 200                        | 61.82                         | 1                     |
| N986I                | B49                   | IR                | 200                        | 57.96                         | 2                     |
| WT                   | B49                   | IR                | 200                        | 56.31                         | 1                     |
| N986I                | B49                   | IR                | 400                        | 35.67                         | 1                     |
| N986I                | B49                   | IR                | 400                        | 38.04                         | 2                     |
| WT                   | B49                   | IR                | 400                        | 35.24                         | 1                     |
| N986I                | B49                   | IR                | 600                        | 6.02                          | 1                     |
| N986I                | B49                   | IR                | 600                        | 5.32                          | 2                     |
| WT                   | B49                   | IR                | 600                        | 8.71                          | 1                     |
| V2728I               | B50                   | Camp              | 2.5                        | 98.54                         | 1                     |
| V2728I               | B50                   | Camp              | 2.5                        | 95.83                         | 2                     |
| WT                   | B50                   | Camp              | 2.5                        | 100.00                        | 1                     |

| Variant <sup>a</sup> | Batch ID <sup>b</sup> | Drug <sup>c</sup> | Concentration <sup>d</sup> | Percent Survived <sup>e</sup> | Clone ID <sup>f</sup> |
|----------------------|-----------------------|-------------------|----------------------------|-------------------------------|-----------------------|
| V2728I               | B50                   | Camp              | 5                          | 100.00                        | 1                     |
| V2728I               | B50                   | Camp              | 5                          | 100.00                        | 2                     |
| WT                   | B50                   | Camp              | 5                          | 100.00                        | 1                     |
| V2728I               | B50                   | Camp              | 25                         | 79.35                         | 1                     |
| V2728I               | B50                   | Camp              | 25                         | 79.66                         | 2                     |
| WT                   | B50                   | Camp              | 25                         | 92.11                         | 1                     |
| V2728I               | B50                   | Camp              | 50                         | 53.30                         | 1                     |
| V2728I               | B50                   | Camp              | 50                         | 55.65                         | 2                     |
| WT                   | B50                   | Camp              | 50                         | 75.32                         | 1                     |
| V2728I               | B50                   | Camp              | 100                        | 14.48                         | 1                     |
| V2728I               | B50                   | Camp              | 100                        | 9.89                          | 2                     |
| WT                   | B50                   | Camp              | 100                        | 19.47                         | 1                     |
| V2728I               | B50                   | Camp              | 200                        | 1.00                          | 1                     |
| V2728I               | B50                   | Camp              | 200                        | 1.06                          | 2                     |
| WT                   | B50                   | Camp              | 200                        | 1.00                          | 1                     |
| V2728I               | B50                   | MMC               | 5                          | 91.40                         | 1                     |
| V2728I               | B50                   | MMC               | 5                          | 94.63                         | 2                     |
| WT                   | B50                   | MMC               | 5                          | 100.00                        | 1                     |
| V2728I               | B50                   | MMC               | 10                         | 97.95                         | 1                     |
| V2728I               | B50                   | MMC               | 10                         | 98.36                         | 2                     |
| WT                   | B50                   | MMC               | 10                         | 96.55                         | 1                     |
| V2728I               | B50                   | MMC               | 20                         | 86.16                         | 1                     |
| V2728I               | B50                   | MMC               | 20                         | 84.23                         | 2                     |
| WT                   | B50                   | MMC               | 20                         | 93.34                         | 1                     |
| V2728I               | B50                   | MMC               | 40                         | 61.51                         | 1                     |
| V2728I               | B50                   | MMC               | 40                         | 69.83                         | 2                     |
| WT                   | B50                   | MMC               | 40                         | 66.46                         | 1                     |
| V2728I               | B50                   | MMC               | 60                         | 26.13                         | 1                     |
| V2728I               | B50                   | MMC               | 60                         | 37.57                         | 2                     |
| WT                   | B50                   | MMC               | 60                         | 40.39                         | 1                     |
| V2728I               | B50                   | MMC               | 80                         | 8.44                          | 1                     |
| V2728I               | B50                   | MMC               | 80                         | 13.68                         | 2                     |
| WT                   | B50                   | MMC               | 80                         | 14.28                         | 1                     |
| V2728I               | B50                   | Cisp              | 0.2                        | 64.68                         | 1                     |
| V2728I               | B50                   | Cisp              | 0.2                        | 64.96                         | 2                     |
| WT                   | B50                   | Cisp              | 0.2                        | 96.74                         | 1                     |
| V2728I               | B50                   | Cisp              | 0.4                        | 40.58                         | 1                     |
| V2728I               | B50                   | Cisp              | 0.4                        | 40.75                         | 2                     |
| WT                   | B50                   | Cisp              | 0.4                        | 79.99                         | 1                     |
| V2728I               | B50                   | Cisp              | 0.6                        | 23.40                         | 1                     |

| Variant <sup>a</sup> | Batch ID <sup>b</sup> | Drug <sup>c</sup> | Concentration <sup>d</sup> | Percent Survived <sup>e</sup> | Clone ID <sup>f</sup> |
|----------------------|-----------------------|-------------------|----------------------------|-------------------------------|-----------------------|
| V2728I               | B50                   | Cisp              | 0.6                        | 23.04                         | 2                     |
| WT                   | B50                   | Cisp              | 0.6                        | 60.98                         | 1                     |
| V2728I               | B50                   | Cisp              | 1                          | 7.10                          | 1                     |
| V2728I               | B50                   | Cisp              | 1                          | 3.44                          | 2                     |
| WT                   | B50                   | Cisp              | 1                          | 16.86                         | 1                     |
| V2728I               | B50                   | Cisp              | 1.2                        | 4.91                          | 1                     |
| V2728I               | B50                   | Cisp              | 1.2                        | 2.27                          | 2                     |
| WT                   | B50                   | Cisp              | 1.2                        | 12.55                         | 1                     |
| V2728I               | B50                   | Cisp              | 1.5                        | 2.98                          | 1                     |
| V2728I               | B50                   | Cisp              | 1.5                        | 2.14                          | 2                     |
| WT                   | B50                   | Cisp              | 1.5                        | 6.14                          | 1                     |
| V2728I               | B50                   | MMS               | 5                          | 100.00                        | 1                     |
| V2728I               | B50                   | MMS               | 5                          | 91.01                         | 2                     |
| WT                   | B50                   | MMS               | 5                          | 100.00                        | 1                     |
| V2728I               | B50                   | MMS               | 10                         | 94.68                         | 1                     |
| V2728I               | B50                   | MMS               | 10                         | 83.30                         | 2                     |
| WT                   | B50                   | MMS               | 10                         | 98.85                         | 1                     |
| V2728I               | B50                   | MMS               | 15                         | 69.83                         | 1                     |
| V2728I               | B50                   | MMS               | 15                         | 74.53                         | 2                     |
| WT                   | B50                   | MMS               | 15                         | 100.00                        | 1                     |
| V2728I               | B50                   | MMS               | 20                         | 47.76                         | 1                     |
| V2728I               | B50                   | MMS               | 20                         | 55.36                         | 2                     |
| WT                   | B50                   | MMS               | 20                         | 82.46                         | 1                     |
| V2728I               | B50                   | MMS               | 30                         | 10.57                         | 1                     |
| V2728I               | B50                   | MMS               | 30                         | 11.34                         | 2                     |
| WT                   | B50                   | MMS               | 30                         | 32.01                         | 1                     |
| V2728I               | B50                   | MMS               | 40                         | 1.08                          | 1                     |
| V2728I               | B50                   | MMS               | 40                         | 1.00                          | 2                     |
| WT                   | B50                   | MMS               | 40                         | 2.10                          | 1                     |
| V2728I               | B50                   | Parp              | 0.01                       | 90.26                         | 1                     |
| V2728I               | B50                   | Parp              | 0.01                       | 89.18                         | 2                     |
| WT                   | B50                   | Parp              | 0.01                       | 100.00                        | 1                     |
| V2728I               | B50                   | Parp              | 0.1                        | 54.99                         | 1                     |
| V2728I               | B50                   | Parp              | 0.1                        | 65.73                         | 2                     |
| WT                   | B50                   | Parp              | 0.1                        | 90.67                         | 1                     |
| V2728I               | B50                   | Parp              | 1                          | 21.95                         | 1                     |
| V2728I               | B50                   | Parp              | 1                          | 13.11                         | 2                     |
| WT                   | B50                   | Parp              | 1                          | 79.68                         | 1                     |
| V2728I               | B50                   | Parp              | 10                         | 1.28                          | 1                     |
| V2728I               | B50                   | Parp              | 10                         | 1.00                          | 2                     |

| Variant <sup>a</sup> | Batch ID <sup>b</sup> | Drug <sup>c</sup> | Concentration <sup>d</sup> | Percent Survived <sup>e</sup> | Clone ID <sup>f</sup> |
|----------------------|-----------------------|-------------------|----------------------------|-------------------------------|-----------------------|
| WT                   | B50                   | Parp              | 10                         | 2.48                          | 1                     |
| V2728I               | B50                   | IR                | 50                         | 96.74                         | 1                     |
| V2728I               | B50                   | IR                | 50                         | 97.78                         | 2                     |
| WT                   | B50                   | IR                | 50                         | 100.00                        | 1                     |
| V2728I               | B50                   | IR                | 100                        | 80.89                         | 1                     |
| V2728I               | B50                   | IR                | 100                        | 87.81                         | 2                     |
| WT                   | B50                   | IR                | 100                        | 100.00                        | 1                     |
| V2728I               | B50                   | IR                | 200                        | 21.91                         | 1                     |
| V2728I               | B50                   | IR                | 200                        | 18.78                         | 2                     |
| WT                   | B50                   | IR                | 200                        | 98.18                         | 1                     |
| V2728I               | B50                   | IR                | 400                        | 23.15                         | 1                     |
| V2728I               | B50                   | IR                | 400                        | 36.03                         | 2                     |
| WT                   | B50                   | IR                | 400                        | 77.98                         | 1                     |
| V2728I               | B50                   | IR                | 600                        | 15.31                         | 1                     |
| V2728I               | B50                   | IR                | 600                        | 25.66                         | 2                     |
| WT                   | B50                   | IR                | 600                        | 55.44                         | 1                     |
| L2106P               | B51                   | Camp              | 2.5                        | 100.00                        | 1                     |
| L2106P               | B51                   | Camp              | 2.5                        | 100.00                        | 2                     |
| WT                   | B51                   | Camp              | 2.5                        | 100.00                        | 1                     |
| L2106P               | B51                   | Camp              | 5                          | 91.27                         | 1                     |
| L2106P               | B51                   | Camp              | 5                          | 98.59                         | 2                     |
| WT                   | B51                   | Camp              | 5                          | 100.00                        | 1                     |
| L2106P               | B51                   | Camp              | 25                         | 72.65                         | 1                     |
| L2106P               | B51                   | Camp              | 25                         | 71.44                         | 2                     |
| WT                   | B51                   | Camp              | 25                         | 85.85                         | 1                     |
| L2106P               | B51                   | Camp              | 50                         | 25.71                         | 1                     |
| L2106P               | B51                   | Camp              | 50                         | 44.84                         | 2                     |
| WT                   | B51                   | Camp              | 50                         | 58.71                         | 1                     |
| L2106P               | B51                   | Camp              | 100                        | 3.84                          | 1                     |
| L2106P               | B51                   | Camp              | 100                        | 14.66                         | 2                     |
| WT                   | B51                   | Camp              | 100                        | 27.88                         | 1                     |
| L2106P               | B51                   | Camp              | 200                        | 1.00                          | 1                     |
| L2106P               | B51                   | Camp              | 200                        | 2.17                          | 2                     |
| WT                   | B51                   | Camp              | 200                        | 2.45                          | 1                     |
| L2106P               | B51                   | MMC               | 5                          | 66.80                         | 1                     |
| L2106P               | B51                   | MMC               | 5                          | 38.25                         | 2                     |
| WT                   | B51                   | MMC               | 5                          | 78.25                         | 1                     |
| L2106P               | B51                   | MMC               | 10                         | 34.61                         | 1                     |
| L2106P               | B51                   | MMC               | 10                         | 6.72                          | 2                     |
| WT                   | B51                   | MMC               | 10                         | 53.63                         | 1                     |

| Variant <sup>a</sup> | Batch ID <sup>b</sup> | Drug <sup>c</sup> | Concentration <sup>d</sup> | Percent Survived <sup>e</sup> | Clone ID <sup>f</sup> |
|----------------------|-----------------------|-------------------|----------------------------|-------------------------------|-----------------------|
| L2106P               | B51                   | MMC               | 20                         | 18.61                         | 1                     |
| L2106P               | B51                   | MMC               | 20                         | 1.00                          | 2                     |
| WT                   | B51                   | MMC               | 20                         | 34.47                         | 1                     |
| L2106P               | B51                   | MMC               | 40                         | 1.00                          | 1                     |
| L2106P               | B51                   | MMC               | 40                         | 1.00                          | 2                     |
| WT                   | B51                   | MMC               | 40                         | 1.00                          | 1                     |
| L2106P               | B51                   | MMC               | 60                         | 1.00                          | 1                     |
| L2106P               | B51                   | MMC               | 60                         | 1.00                          | 2                     |
| WT                   | B51                   | MMC               | 60                         | 1.00                          | 1                     |
| L2106P               | B51                   | MMC               | 80                         | 1.00                          | 1                     |
| L2106P               | B51                   | MMC               | 80                         | 1.00                          | 2                     |
| WT                   | B51                   | MMC               | 80                         | 1.00                          | 1                     |
| L2106P               | B51                   | Cisp              | 0.2                        | 85.03                         | 1                     |
| L2106P               | B51                   | Cisp              | 0.2                        | 61.72                         | 2                     |
| WT                   | B51                   | Cisp              | 0.2                        | 78.17                         | 1                     |
| L2106P               | B51                   | Cisp              | 0.4                        | 56.62                         | 1                     |
| L2106P               | B51                   | Cisp              | 0.4                        | 27.61                         | 2                     |
| WT                   | B51                   | Cisp              | 0.4                        | 55.93                         | 1                     |
| L2106P               | B51                   | Cisp              | 0.6                        | 27.49                         | 1                     |
| L2106P               | B51                   | Cisp              | 0.6                        | 13.11                         | 2                     |
| WT                   | B51                   | Cisp              | 0.6                        | 30.48                         | 1                     |
| L2106P               | B51                   | Cisp              | 1                          | 6.21                          | 1                     |
| L2106P               | B51                   | Cisp              | 1                          | 1.04                          | 2                     |
| WT                   | B51                   | Cisp              | 1                          | 9.23                          | 1                     |
| L2106P               | B51                   | Cisp              | 1.2                        | 4.58                          | 1                     |
| L2106P               | B51                   | Cisp              | 1.2                        | 1.00                          | 2                     |
| WT                   | B51                   | Cisp              | 1.2                        | 5.93                          | 1                     |
| L2106P               | B51                   | Cisp              | 1.5                        | 3.36                          | 1                     |
| L2106P               | B51                   | Cisp              | 1.5                        | 3.02                          | 2                     |
| WT                   | B51                   | Cisp              | 1.5                        | 4.70                          | 1                     |
| L2106P               | B51                   | MMS               | 5                          | 84.14                         | 1                     |
| L2106P               | B51                   | MMS               | 5                          | 78.64                         | 2                     |
| WT                   | B51                   | MMS               | 5                          | 88.45                         | 1                     |
| L2106P               | B51                   | MMS               | 10                         | 75.57                         | 1                     |
| L2106P               | B51                   | MMS               | 10                         | 65.39                         | 2                     |
| WT                   | B51                   | MMS               | 10                         | 83.86                         | 1                     |
| L2106P               | B51                   | MMS               | 15                         | 49.16                         | 1                     |
| L2106P               | B51                   | MMS               | 15                         | 59.07                         | 2                     |
| WT                   | B51                   | MMS               | 15                         | 78.93                         | 1                     |
| L2106P               | B51                   | MMS               | 20                         | 25.62                         | 1                     |

| Variant <sup>a</sup> | Batch ID <sup>b</sup> | Drug <sup>c</sup> | Concentration <sup>d</sup> | Percent Survived <sup>e</sup> | Clone ID <sup>f</sup> |
|----------------------|-----------------------|-------------------|----------------------------|-------------------------------|-----------------------|
| L2106P               | B51                   | MMS               | 20                         | 34.96                         | 2                     |
| WT                   | B51                   | MMS               | 20                         | 67.80                         | 1                     |
| L2106P               | B51                   | MMS               | 30                         | 1.00                          | 1                     |
| L2106P               | B51                   | MMS               | 30                         | 9.90                          | 2                     |
| WT                   | B51                   | MMS               | 30                         | 35.00                         | 1                     |
| L2106P               | B51                   | MMS               | 40                         | 1.00                          | 1                     |
| L2106P               | B51                   | MMS               | 40                         | 1.19                          | 2                     |
| WT                   | B51                   | MMS               | 40                         | 6.63                          | 1                     |
| L2106P               | B51                   | Parp              | 0.01                       | 97.21                         | 1                     |
| L2106P               | B51                   | Parp              | 0.01                       | 95.22                         | 2                     |
| WT                   | B51                   | Parp              | 0.01                       | 98.56                         | 1                     |
| L2106P               | B51                   | Parp              | 0.1                        | 64.98                         | 1                     |
| L2106P               | B51                   | Parp              | 0.1                        | 75.72                         | 2                     |
| WT                   | B51                   | Parp              | 0.1                        | 84.59                         | 1                     |
| L2106P               | B51                   | Parp              | 1                          | 12.58                         | 1                     |
| L2106P               | B51                   | Parp              | 1                          | 28.43                         | 2                     |
| WT                   | B51                   | Parp              | 1                          | 59.61                         | 1                     |
| L2106P               | B51                   | Parp              | 10                         | 1.00                          | 1                     |
| L2106P               | B51                   | Parp              | 10                         | 1.00                          | 2                     |
| WT                   | B51                   | Parp              | 10                         | 3.34                          | 1                     |
| L2106P               | B51                   | IR                | 50                         | 79.75                         | 1                     |
| L2106P               | B51                   | IR                | 50                         | 79.67                         | 2                     |
| WT                   | B51                   | IR                | 50                         | 89.09                         | 1                     |
| L2106P               | B51                   | IR                | 100                        | 80.85                         | 1                     |
| L2106P               | B51                   | IR                | 100                        | 73.60                         | 2                     |
| WT                   | B51                   | IR                | 100                        | 68.18                         | 1                     |
| L2106P               | B51                   | IR                | 200                        | 51.41                         | 1                     |
| L2106P               | B51                   | IR                | 200                        | 54.55                         | 2                     |
| WT                   | B51                   | IR                | 200                        | 60.06                         | 1                     |
| L2106P               | B51                   | IR                | 400                        | 31.16                         | 1                     |
| L2106P               | B51                   | IR                | 400                        | 32.93                         | 2                     |
| WT                   | B51                   | IR                | 400                        | 42.73                         | 1                     |
| L2106P               | B51                   | IR                | 600                        | 19.31                         | 1                     |
| L2106P               | B51                   | IR                | 600                        | 16.38                         | 2                     |
| WT                   | B51                   | IR                | 600                        | 24.68                         | 1                     |
| S2152Y               | B52                   | Camp              | 2.5                        | 98.52                         | 1                     |
| S2152Y               | B52                   | Camp              | 2.5                        | 98.65                         | 2                     |
| WT                   | B52                   | Camp              | 2.5                        | 100.00                        | 1                     |
| S2152Y               | B52                   | Camp              | 5                          | 94.57                         | 1                     |
| S2152Y               | B52                   | Camp              | 5                          | 94.34                         | 2                     |

| Variant <sup>a</sup> | Batch ID <sup>b</sup> | Drug <sup>c</sup> | Concentration <sup>d</sup> | Percent Survived <sup>e</sup> | Clone ID <sup>f</sup> |
|----------------------|-----------------------|-------------------|----------------------------|-------------------------------|-----------------------|
| WT                   | B52                   | Camp              | 5                          | 97.50                         | 1                     |
| S2152Y               | B52                   | Camp              | 25                         | 59.43                         | 1                     |
| S2152Y               | B52                   | Camp              | 25                         | 69.16                         | 2                     |
| WT                   | B52                   | Camp              | 25                         | 77.81                         | 1                     |
| S2152Y               | B52                   | Camp              | 50                         | 24.78                         | 1                     |
| S2152Y               | B52                   | Camp              | 50                         | 38.73                         | 2                     |
| WT                   | B52                   | Camp              | 50                         | 37.45                         | 1                     |
| S2152Y               | B52                   | Camp              | 100                        | 6.78                          | 1                     |
| S2152Y               | B52                   | Camp              | 100                        | 5.42                          | 2                     |
| WT                   | B52                   | Camp              | 100                        | 3.50                          | 1                     |
| S2152Y               | B52                   | Camp              | 200                        | 2.47                          | 1                     |
| S2152Y               | B52                   | Camp              | 200                        | 1.59                          | 2                     |
| WT                   | B52                   | Camp              | 200                        | 1.00                          | 1                     |
| S2152Y               | B52                   | MMC               | 5                          | 67.04                         | 1                     |
| S2152Y               | B52                   | MMC               | 5                          | 80.87                         | 2                     |
| WT                   | B52                   | MMC               | 5                          | 75.57                         | 1                     |
| S2152Y               | B52                   | MMC               | 10                         | 53.43                         | 1                     |
| S2152Y               | B52                   | MMC               | 10                         | 82.65                         | 2                     |
| WT                   | B52                   | MMC               | 10                         | 74.07                         | 1                     |
| S2152Y               | B52                   | MMC               | 20                         | 30.42                         | 1                     |
| S2152Y               | B52                   | MMC               | 20                         | 54.16                         | 2                     |
| WT                   | B52                   | MMC               | 20                         | 61.17                         | 1                     |
| S2152Y               | B52                   | MMC               | 40                         | 10.73                         | 1                     |
| S2152Y               | B52                   | MMC               | 40                         | 29.38                         | 2                     |
| WT                   | B52                   | MMC               | 40                         | 29.19                         | 1                     |
| S2152Y               | B52                   | MMC               | 60                         | 3.87                          | 1                     |
| S2152Y               | B52                   | MMC               | 60                         | 12.03                         | 2                     |
| WT                   | B52                   | MMC               | 60                         | 9.97                          | 1                     |
| S2152Y               | B52                   | MMC               | 80                         | 1.55                          | 1                     |
| S2152Y               | B52                   | MMC               | 80                         | 5.25                          | 2                     |
| WT                   | B52                   | MMC               | 80                         | 3.52                          | 1                     |
| S2152Y               | B52                   | Cisp              | 0.2                        | 46.89                         | 1                     |
| S2152Y               | B52                   | Cisp              | 0.2                        | 67.04                         | 2                     |
| WT                   | B52                   | Cisp              | 0.2                        | 66.60                         | 1                     |
| S2152Y               | B52                   | Cisp              | 0.4                        | 19.88                         | 1                     |
| S2152Y               | B52                   | Cisp              | 0.4                        | 47.44                         | 2                     |
| WT                   | B52                   | Cisp              | 0.4                        | 43.04                         | 1                     |
| S2152Y               | B52                   | Cisp              | 0.6                        | 13.05                         | 1                     |
| S2152Y               | B52                   | Cisp              | 0.6                        | 32.54                         | 2                     |
| WT                   | B52                   | Cisp              | 0.6                        | 19.82                         | 1                     |



| Variant <sup>a</sup> | Batch ID <sup>b</sup> | Drug <sup>c</sup> | Concentration <sup>d</sup> | Percent Survived <sup>e</sup> | Clone ID <sup>f</sup> |
|----------------------|-----------------------|-------------------|----------------------------|-------------------------------|-----------------------|
| S2152Y               | B52                   | Cisp              | 1                          | 6.01                          | 1                     |
| S2152Y               | B52                   | Cisp              | 1                          | 12.01                         | 2                     |
| WT                   | B52                   | Cisp              | 1                          | 9.70                          | 1                     |
| S2152Y               | B52                   | Cisp              | 1.2                        | 4.18                          | 1                     |
| S2152Y               | B52                   | Cisp              | 1.2                        | 7.41                          | 2                     |
| WT                   | B52                   | Cisp              | 1.2                        | 6.38                          | 1                     |
| S2152Y               | B52                   | Cisp              | 1.5                        | 2.75                          | 1                     |
| S2152Y               | B52                   | Cisp              | 1.5                        | 5.28                          | 2                     |
| WT                   | B52                   | Cisp              | 1.5                        | 4.37                          | 1                     |
| S2152Y               | B52                   | MMS               | 5                          | 80.46                         | 1                     |
| S2152Y               | B52                   | MMS               | 5                          | 91.42                         | 2                     |
| WT                   | B52                   | MMS               | 5                          | 100.00                        | 1                     |
| S2152Y               | B52                   | MMS               | 10                         | 58.37                         | 1                     |
| S2152Y               | B52                   | MMS               | 10                         | 88.92                         | 2                     |
| WT                   | B52                   | MMS               | 10                         | 82.63                         | 1                     |
| S2152Y               | B52                   | MMS               | 15                         | 26.31                         | 1                     |
| S2152Y               | B52                   | MMS               | 15                         | 72.65                         | 2                     |
| WT                   | B52                   | MMS               | 15                         | 75.09                         | 1                     |
| S2152Y               | B52                   | MMS               | 20                         | 19.67                         | 1                     |
| S2152Y               | B52                   | MMS               | 20                         | 61.88                         | 2                     |
| WT                   | B52                   | MMS               | 20                         | 67.63                         | 1                     |
| S2152Y               | B52                   | MMS               | 30                         | 2.17                          | 1                     |
| S2152Y               | B52                   | MMS               | 30                         | 7.88                          | 2                     |
| WT                   | B52                   | MMS               | 30                         | 6.49                          | 1                     |
| S2152Y               | B52                   | MMS               | 40                         | 1.00                          | 1                     |
| S2152Y               | B52                   | MMS               | 40                         | 1.40                          | 2                     |
| WT                   | B52                   | MMS               | 40                         | 1.05                          | 1                     |
| S2152Y               | B52                   | Parp              | 0.01                       | 53.92                         | 1                     |
| S2152Y               | B52                   | Parp              | 0.01                       | 77.02                         | 2                     |
| WT                   | B52                   | Parp              | 0.01                       | 100.00                        | 1                     |
| S2152Y               | B52                   | Parp              | 0.1                        | 33.18                         | 1                     |
| S2152Y               | B52                   | Parp              | 0.1                        | 73.34                         | 2                     |
| WT                   | B52                   | Parp              | 0.1                        | 93.20                         | 1                     |
| S2152Y               | B52                   | Parp              | 1                          | 1.91                          | 1                     |
| S2152Y               | B52                   | Parp              | 1                          | 48.73                         | 2                     |
| WT                   | B52                   | Parp              | 1                          | 71.52                         | 1                     |
| S2152Y               | B52                   | Parp              | 10                         | 1.00                          | 1                     |
| S2152Y               | B52                   | Parp              | 10                         | 2.04                          | 2                     |
| WT                   | B52                   | Parp              | 10                         | 2.80                          | 1                     |
| S2152Y               | B52                   | IR                | 50                         | 71.36                         | 1                     |

| Variant <sup>a</sup> | Batch ID <sup>b</sup> | Drug <sup>c</sup> | Concentration <sup>d</sup> | Percent Survived <sup>e</sup> | Clone ID <sup>f</sup> |
|----------------------|-----------------------|-------------------|----------------------------|-------------------------------|-----------------------|
| S2152Y               | B52                   | IR                | 50                         | 90.86                         | 2                     |
| WT                   | B52                   | IR                | 50                         | 89.71                         | 1                     |
| S2152Y               | B52                   | IR                | 100                        | 77.76                         | 1                     |
| S2152Y               | B52                   | IR                | 100                        | 98.96                         | 2                     |
| WT                   | B52                   | IR                | 100                        | 85.35                         | 1                     |
| S2152Y               | B52                   | IR                | 200                        | 47.93                         | 1                     |
| S2152Y               | B52                   | IR                | 200                        | 79.26                         | 2                     |
| WT                   | B52                   | IR                | 200                        | 60.77                         | 1                     |
| S2152Y               | B52                   | IR                | 400                        | 22.83                         | 1                     |
| S2152Y               | B52                   | IR                | 400                        | 47.58                         | 2                     |
| WT                   | B52                   | IR                | 400                        | 36.92                         | 1                     |
| S2152Y               | B52                   | IR                | 600                        | 18.21                         | 1                     |
| S2152Y               | B52                   | IR                | 600                        | 29.96                         | 2                     |
| WT                   | B52                   | IR                | 600                        | 16.28                         | 1                     |
| D1781G               | B53                   | Camp              | 2.5                        | 100.00                        | 1                     |
| D1781G               | B53                   | Camp              | 2.5                        | 100.00                        | 2                     |
| WT                   | B53                   | Camp              | 2.5                        | 97.00                         | 1                     |
| D1781G               | B53                   | Camp              | 5                          | 100.00                        | 1                     |
| D1781G               | B53                   | Camp              | 5                          | 100.00                        | 2                     |
| WT                   | B53                   | Camp              | 5                          | 95.00                         | 1                     |
| D1781G               | B53                   | Camp              | 25                         | 88.00                         | 1                     |
| D1781G               | B53                   | Camp              | 25                         | 89.00                         | 2                     |
| WT                   | B53                   | Camp              | 25                         | 72.00                         | 1                     |
| D1781G               | B53                   | Camp              | 50                         | 60.00                         | 1                     |
| D1781G               | B53                   | Camp              | 50                         | 53.00                         | 2                     |
| WT                   | B53                   | Camp              | 50                         | 52.00                         | 1                     |
| D1781G               | B53                   | Camp              | 100                        | 13.00                         | 1                     |
| D1781G               | B53                   | Camp              | 100                        | 5.00                          | 2                     |
| WT                   | B53                   | Camp              | 100                        | 13.00                         | 1                     |
| D1781G               | B53                   | Camp              | 200                        | 4.00                          | 1                     |
| D1781G               | B53                   | Camp              | 200                        | 3.00                          | 2                     |
| WT                   | B53                   | Camp              | 200                        | 2.00                          | 1                     |
| D1781G               | B53                   | MMC               | 5                          | 90.00                         | 1                     |
| D1781G               | B53                   | MMC               | 5                          | 100.00                        | 2                     |
| WT                   | B53                   | MMC               | 5                          | 100.00                        | 1                     |
| D1781G               | B53                   | MMC               | 10                         | 93.00                         | 1                     |
| D1781G               | B53                   | MMC               | 10                         | 100.00                        | 2                     |
| WT                   | B53                   | MMC               | 10                         | 100.00                        | 1                     |
| D1781G               | B53                   | MMC               | 20                         | 84.00                         | 1                     |
| D1781G               | B53                   | MMC               | 20                         | 100.00                        | 2                     |

| Variant <sup>a</sup> | Batch ID <sup>b</sup> | Drug <sup>c</sup> | Concentration <sup>d</sup> | Percent Survived <sup>e</sup> | Clone ID <sup>f</sup> |
|----------------------|-----------------------|-------------------|----------------------------|-------------------------------|-----------------------|
| WT                   | B53                   | MMC               | 20                         | 89.00                         | 1                     |
| D1781G               | B53                   | MMC               | 40                         | 36.00                         | 1                     |
| D1781G               | B53                   | MMC               | 40                         | 55.00                         | 2                     |
| WT                   | B53                   | MMC               | 40                         | 55.00                         | 1                     |
| D1781G               | B53                   | MMC               | 60                         | 11.00                         | 1                     |
| D1781G               | B53                   | MMC               | 60                         | 16.00                         | 2                     |
| WT                   | B53                   | MMC               | 60                         | 28.00                         | 1                     |
| D1781G               | B53                   | MMC               | 80                         | 6.00                          | 1                     |
| D1781G               | B53                   | MMC               | 80                         | 6.00                          | 2                     |
| WT                   | B53                   | MMC               | 80                         | 16.00                         | 1                     |
| D1781G               | B53                   | Cisp              | 0.2                        | 69.00                         | 1                     |
| D1781G               | B53                   | Cisp              | 0.2                        | 77.00                         | 2                     |
| WT                   | B53                   | Cisp              | 0.2                        | 78.00                         | 1                     |
| D1781G               | B53                   | Cisp              | 0.4                        | 45.00                         | 1                     |
| D1781G               | B53                   | Cisp              | 0.4                        | 62.00                         | 2                     |
| WT                   | B53                   | Cisp              | 0.4                        | 67.00                         | 1                     |
| D1781G               | B53                   | Cisp              | 0.6                        | 30.00                         | 1                     |
| D1781G               | B53                   | Cisp              | 0.6                        | 38.00                         | 2                     |
| WT                   | B53                   | Cisp              | 0.6                        | 59.00                         | 1                     |
| D1781G               | B53                   | Cisp              | 1                          | 12.00                         | 1                     |
| D1781G               | B53                   | Cisp              | 1                          | 15.00                         | 2                     |
| WT                   | B53                   | Cisp              | 1                          | 45.00                         | 1                     |
| D1781G               | B53                   | Cisp              | 1.2                        | 7.00                          | 1                     |
| D1781G               | B53                   | Cisp              | 1.2                        | 7.00                          | 2                     |
| WT                   | B53                   | Cisp              | 1.2                        | 33.00                         | 1                     |
| D1781G               | B53                   | Cisp              | 1.5                        | 5.00                          | 1                     |
| D1781G               | B53                   | Cisp              | 1.5                        | 4.00                          | 2                     |
| WT                   | B53                   | Cisp              | 1.5                        | 30.00                         | 1                     |
| D1781G               | B53                   | MMS               | 5                          | 97.00                         | 1                     |
| D1781G               | B53                   | MMS               | 5                          | 93.00                         | 2                     |
| WT                   | B53                   | MMS               | 5                          | 100.00                        | 1                     |
| D1781G               | B53                   | MMS               | 10                         | 100.00                        | 1                     |
| D1781G               | B53                   | MMS               | 10                         | 87.00                         | 2                     |
| WT                   | B53                   | MMS               | 10                         | 100.00                        | 1                     |
| D1781G               | B53                   | MMS               | 15                         | 100.00                        | 1                     |
| D1781G               | B53                   | MMS               | 15                         | 85.00                         | 2                     |
| WT                   | B53                   | MMS               | 15                         | 95.00                         | 1                     |
| D1781G               | B53                   | MMS               | 20                         | 89.00                         | 1                     |
| D1781G               | B53                   | MMS               | 20                         | 47.00                         | 2                     |
| WT                   | B53                   | MMS               | 20                         | 76.00                         | 1                     |

| Variant <sup>a</sup> | Batch ID <sup>b</sup> | Drug <sup>c</sup> | Concentration <sup>d</sup> | Percent Survived <sup>e</sup> | Clone ID <sup>f</sup> |
|----------------------|-----------------------|-------------------|----------------------------|-------------------------------|-----------------------|
| D1781G               | B53                   | MMS               | 30                         | 24.00                         | 1                     |
| D1781G               | B53                   | MMS               | 30                         | 9.00                          | 2                     |
| WT                   | B53                   | MMS               | 30                         | 47.00                         | 1                     |
| D1781G               | B53                   | MMS               | 40                         | 6.00                          | 1                     |
| D1781G               | B53                   | MMS               | 40                         | 3.00                          | 2                     |
| WT                   | B53                   | MMS               | 40                         | 21.00                         | 1                     |
| D1781G               | B53                   | Parp              | 0.01                       | 92.39                         | 1                     |
| D1781G               | B53                   | Parp              | 0.01                       | 82.45                         | 2                     |
| WT                   | B53                   | Parp              | 0.01                       | 86.37                         | 1                     |
| D1781G               | B53                   | Parp              | 0.1                        | 68.35                         | 1                     |
| D1781G               | B53                   | Parp              | 0.1                        | 61.08                         | 2                     |
| WT                   | B53                   | Parp              | 0.1                        | 71.32                         | 1                     |
| D1781G               | B53                   | Parp              | 1                          | 34.05                         | 1                     |
| D1781G               | B53                   | Parp              | 1                          | 31.28                         | 2                     |
| WT                   | B53                   | Parp              | 1                          | 50.27                         | 1                     |
| D1781G               | B53                   | Parp              | 10                         | 3.62                          | 1                     |
| D1781G               | B53                   | Parp              | 10                         | 4.69                          | 2                     |
| WT                   | B53                   | Parp              | 10                         | 2.08                          | 1                     |
| D1781G               | B53                   | IR                | 50                         | 81.00                         | 1                     |
| D1781G               | B53                   | IR                | 50                         | 83.00                         | 2                     |
| WT                   | B53                   | IR                | 50                         | 84.40                         | 1                     |
| D1781G               | B53                   | IR                | 100                        | 55.00                         | 1                     |
| D1781G               | B53                   | IR                | 100                        | 58.00                         | 2                     |
| WT                   | B53                   | IR                | 100                        | 60.57                         | 1                     |
| D1781G               | B53                   | IR                | 200                        | 41.00                         | 1                     |
| D1781G               | B53                   | IR                | 200                        | 43.00                         | 2                     |
| WT                   | B53                   | IR                | 200                        | 54.17                         | 1                     |
| D1781G               | B53                   | IR                | 400                        | 17.00                         | 1                     |
| D1781G               | B53                   | IR                | 400                        | 16.00                         | 2                     |
| WT                   | B53                   | IR                | 400                        | 22.95                         | 1                     |
| D1781G               | B53                   | IR                | 600                        | 13.00                         | 1                     |
| D1781G               | B53                   | IR                | 600                        | 11.00                         | 2                     |
| WT                   | B53                   | IR                | 600                        | 13.08                         | 1                     |
| T1302del             | B54                   | Camp              | 2.5                        | 98.00                         | 1                     |
| T1302del             | B54                   | Camp              | 2.5                        | 98.00                         | 2                     |
| WT                   | B54                   | Camp              | 2.5                        | 97.00                         | 1                     |
| T1302del             | B54                   | Camp              | 5                          | 100.00                        | 1                     |
| T1302del             | B54                   | Camp              | 5                          | 96.00                         | 2                     |
| WT                   | B54                   | Camp              | 5                          | 95.00                         | 1                     |
| T1302del             | B54                   | Camp              | 25                         | 67.00                         | 1                     |

| Variant <sup>a</sup> | Batch ID <sup>b</sup> | Drug <sup>c</sup> | Concentration <sup>d</sup> | Percent Survived <sup>e</sup> | Clone ID <sup>f</sup> |
|----------------------|-----------------------|-------------------|----------------------------|-------------------------------|-----------------------|
| T1302del             | B54                   | Camp              | 25                         | 76.00                         | 2                     |
| WT                   | B54                   | Camp              | 25                         | 72.00                         | 1                     |
| T1302del             | B54                   | Camp              | 50                         | 39.00                         | 1                     |
| T1302del             | B54                   | Camp              | 50                         | 34.00                         | 2                     |
| WT                   | B54                   | Camp              | 50                         | 52.00                         | 1                     |
| T1302del             | B54                   | Camp              | 100                        | 5.00                          | 1                     |
| T1302del             | B54                   | Camp              | 100                        | 3.00                          | 2                     |
| WT                   | B54                   | Camp              | 100                        | 13.00                         | 1                     |
| T1302del             | B54                   | Camp              | 200                        | 2.00                          | 1                     |
| T1302del             | B54                   | Camp              | 200                        | 1.00                          | 2                     |
| WT                   | B54                   | Camp              | 200                        | 2.00                          | 1                     |
| T1302del             | B54                   | MMC               | 5                          | 100.00                        | 1                     |
| T1302del             | B54                   | MMC               | 5                          | 95.00                         | 2                     |
| WT                   | B54                   | MMC               | 5                          | 100.00                        | 1                     |
| T1302del             | B54                   | MMC               | 10                         | 80.00                         | 1                     |
| T1302del             | B54                   | MMC               | 10                         | 98.00                         | 2                     |
| WT                   | B54                   | MMC               | 10                         | 100.00                        | 1                     |
| T1302del             | B54                   | MMC               | 20                         | 70.00                         | 1                     |
| T1302del             | B54                   | MMC               | 20                         | 100.00                        | 2                     |
| WT                   | B54                   | MMC               | 20                         | 89.00                         | 1                     |
| T1302del             | B54                   | MMC               | 40                         | 25.00                         | 1                     |
| T1302del             | B54                   | MMC               | 40                         | 44.00                         | 2                     |
| WT                   | B54                   | MMC               | 40                         | 55.00                         | 1                     |
| T1302del             | B54                   | MMC               | 60                         | 6.00                          | 1                     |
| T1302del             | B54                   | MMC               | 60                         | 9.00                          | 2                     |
| WT                   | B54                   | MMC               | 60                         | 28.00                         | 1                     |
| T1302del             | B54                   | MMC               | 80                         | 6.00                          | 1                     |
| T1302del             | B54                   | MMC               | 80                         | 4.00                          | 2                     |
| WT                   | B54                   | MMC               | 80                         | 16.00                         | 1                     |
| T1302del             | B54                   | Cisp              | 0.2                        | 43.00                         | 1                     |
| T1302del             | B54                   | Cisp              | 0.2                        | 63.00                         | 2                     |
| WT                   | B54                   | Cisp              | 0.2                        | 78.00                         | 1                     |
| T1302del             | B54                   | Cisp              | 0.4                        | 19.00                         | 1                     |
| T1302del             | B54                   | Cisp              | 0.4                        | 33.00                         | 2                     |
| WT                   | B54                   | Cisp              | 0.4                        | 67.00                         | 1                     |
| T1302del             | B54                   | Cisp              | 0.6                        | 10.00                         | 1                     |
| T1302del             | B54                   | Cisp              | 0.6                        | 34.00                         | 2                     |
| WT                   | B54                   | Cisp              | 0.6                        | 59.00                         | 1                     |
| T1302del             | B54                   | Cisp              | 1                          | 4.00                          | 1                     |
| T1302del             | B54                   | Cisp              | 1                          | 11.00                         | 2                     |

| Variant <sup>a</sup> | Batch ID <sup>b</sup> | Drug <sup>c</sup> | Concentration <sup>d</sup> | Percent Survived <sup>e</sup> | Clone ID <sup>f</sup> |
|----------------------|-----------------------|-------------------|----------------------------|-------------------------------|-----------------------|
| WT                   | B54                   | Cisp              | 1                          | 45.00                         | 1                     |
| T1302del             | B54                   | Cisp              | 1.2                        | 3.00                          | 1                     |
| T1302del             | B54                   | Cisp              | 1.2                        | 6.00                          | 2                     |
| WT                   | B54                   | Cisp              | 1.2                        | 33.00                         | 1                     |
| T1302del             | B54                   | Cisp              | 1.5                        | 2.00                          | 1                     |
| T1302del             | B54                   | Cisp              | 1.5                        | 3.00                          | 2                     |
| WT                   | B54                   | Cisp              | 1.5                        | 30.00                         | 1                     |
| T1302del             | B54                   | MMS               | 5                          | 85.00                         | 1                     |
| T1302del             | B54                   | MMS               | 5                          | 100.00                        | 2                     |
| WT                   | B54                   | MMS               | 5                          | 100.00                        | 1                     |
| T1302del             | B54                   | MMS               | 10                         | 74.00                         | 1                     |
| T1302del             | B54                   | MMS               | 10                         | 100.00                        | 2                     |
| WT                   | B54                   | MMS               | 10                         | 100.00                        | 1                     |
| T1302del             | B54                   | MMS               | 15                         | 50.00                         | 1                     |
| T1302del             | B54                   | MMS               | 15                         | 85.00                         | 2                     |
| WT                   | B54                   | MMS               | 15                         | 95.00                         | 1                     |
| T1302del             | B54                   | MMS               | 20                         | 26.00                         | 1                     |
| T1302del             | B54                   | MMS               | 20                         | 53.00                         | 2                     |
| WT                   | B54                   | MMS               | 20                         | 76.00                         | 1                     |
| T1302del             | B54                   | MMS               | 30                         | 6.00                          | 1                     |
| T1302del             | B54                   | MMS               | 30                         | 10.00                         | 2                     |
| WT                   | B54                   | MMS               | 30                         | 47.00                         | 1                     |
| T1302del             | B54                   | MMS               | 40                         | 2.00                          | 1                     |
| T1302del             | B54                   | MMS               | 40                         | 3.00                          | 2                     |
| WT                   | B54                   | MMS               | 40                         | 21.00                         | 1                     |
| T1302del             | B54                   | Parp              | 0.01                       | 94.00                         | 1                     |
| T1302del             | B54                   | Parp              | 0.01                       | 82.00                         | 2                     |
| WT                   | B54                   | Parp              | 0.01                       | 100.00                        | 1                     |
| T1302del             | B54                   | Parp              | 0.1                        | 63.00                         | 1                     |
| T1302del             | B54                   | Parp              | 0.1                        | 52.00                         | 2                     |
| WT                   | B54                   | Parp              | 0.1                        | 91.00                         | 1                     |
| T1302del             | B54                   | Parp              | 1                          | 33.00                         | 1                     |
| T1302del             | B54                   | Parp              | 1                          | 25.00                         | 2                     |
| WT                   | B54                   | Parp              | 1                          | 80.00                         | 1                     |
| T1302del             | B54                   | Parp              | 10                         | 5.00                          | 1                     |
| T1302del             | B54                   | Parp              | 10                         | 1.00                          | 2                     |
| WT                   | B54                   | Parp              | 10                         | 14.00                         | 1                     |
| T1302del             | B54                   | IR                | 50                         | 100.00                        | 1                     |
| T1302del             | B54                   | IR                | 50                         | 86.00                         | 2                     |
| WT                   | B54                   | IR                | 50                         | 84.40                         | 1                     |

| Variant <sup>a</sup> | Batch ID <sup>b</sup> | Drug <sup>c</sup> | Concentration <sup>d</sup> | Percent Survived <sup>e</sup> | Clone ID <sup>f</sup> |
|----------------------|-----------------------|-------------------|----------------------------|-------------------------------|-----------------------|
| T1302del             | B54                   | IR                | 100                        | 77.00                         | 1                     |
| T1302del             | B54                   | IR                | 100                        | 62.00                         | 2                     |
| WT                   | B54                   | IR                | 100                        | 60.57                         | 1                     |
| T1302del             | B54                   | IR                | 200                        | 42.00                         | 1                     |
| T1302del             | B54                   | IR                | 200                        | 55.00                         | 2                     |
| WT                   | B54                   | IR                | 200                        | 54.17                         | 1                     |
| T1302del             | B54                   | IR                | 400                        | 22.00                         | 1                     |
| T1302del             | B54                   | IR                | 400                        | 17.00                         | 2                     |
| WT                   | B54                   | IR                | 400                        | 22.95                         | 1                     |
| T1302del             | B54                   | IR                | 600                        | 17.00                         | 1                     |
| T1302del             | B54                   | IR                | 600                        | 13.00                         | 2                     |
| WT                   | B54                   | IR                | 600                        | 13.08                         | 1                     |
| M1300I+1301<br>Tdel  | B55                   | Camp              | 2.5                        | 100.00                        | 1                     |
| M1300I+1301<br>Tdel  | B55                   | Camp              | 2.5                        | 100.00                        | 2                     |
| WT                   | B55                   | Camp              | 2.5                        | 97.00                         | 1                     |
| M1300I+1301<br>Tdel  | B55                   | Camp              | 5                          | 100.00                        | 1                     |
| M1300I+1301<br>Tdel  | B55                   | Camp              | 5                          | 100.00                        | 2                     |
| WT                   | B55                   | Camp              | 5                          | 95.00                         | 1                     |
| M1300I+1301<br>Tdel  | B55                   | Camp              | 25                         | 100.00                        | 1                     |
| M1300I+1301<br>Tdel  | B55                   | Camp              | 25                         | 100.00                        | 2                     |
| WT                   | B55                   | Camp              | 25                         | 72.00                         | 1                     |
| M1300I+1301<br>Tdel  | B55                   | Camp              | 50                         | 68.00                         | 1                     |
| M1300I+1301<br>Tdel  | B55                   | Camp              | 50                         | 61.00                         | 2                     |
| WT                   | B55                   | Camp              | 50                         | 52.00                         | 1                     |
| M1300I+1301<br>Tdel  | B55                   | Camp              | 100                        | 13.00                         | 1                     |
| M1300I+1301<br>Tdel  | B55                   | Camp              | 100                        | 15.00                         | 2                     |
| WT                   | B55                   | Camp              | 100                        | 13.00                         | 1                     |
| M1300I+1301<br>Tdel  | B55                   | Camp              | 200                        | 2.00                          | 1                     |
| M1300I+1301<br>Tdel  | B55                   | Camp              | 200                        | 2.00                          | 2                     |
| WT                   | B55                   | Camp              | 200                        | 2.00                          | 1                     |
| M1300I+1301<br>Tdel  | B55                   | MMC               | 5                          | 100.00                        | 1                     |
| M1300I+1301<br>Tdel  | B55                   | MMC               | 5                          | 97.00                         | 2                     |
| WT                   | B55                   | MMC               | 5                          | 100.00                        | 1                     |
| M1300I+1301<br>Tdel  | B55                   | MMC               | 10                         | 100.00                        | 1                     |

| Variant <sup>a</sup> | Batch ID <sup>b</sup> | Drug <sup>c</sup> | Concentration <sup>d</sup> | Percent Survived <sup>e</sup> | Clone ID <sup>f</sup> |
|----------------------|-----------------------|-------------------|----------------------------|-------------------------------|-----------------------|
| M1300I+1301 Tdel     | B55                   | MMC               | 10                         | 86.00                         | 2                     |
| WT                   | B55                   | MMC               | 10                         | 100.00                        | 1                     |
| M1300I+1301 Tdel     | B55                   | MMC               | 20                         | 100.00                        | 1                     |
| M1300I+1301 Tdel     | B55                   | MMC               | 20                         | 88.00                         | 2                     |
| WT                   | B55                   | MMC               | 20                         | 89.00                         | 1                     |
| M1300I+1301 Tdel     | B55                   | MMC               | 40                         | 37.00                         | 1                     |
| M1300I+1301 Tdel     | B55                   | MMC               | 40                         | 22.00                         | 2                     |
| WT                   | B55                   | MMC               | 40                         | 55.00                         | 1                     |
| M1300I+1301 Tdel     | B55                   | MMC               | 60                         | 12.00                         | 1                     |
| M1300I+1301 Tdel     | B55                   | MMC               | 60                         | 7.00                          | 2                     |
| WT                   | B55                   | MMC               | 60                         | 28.00                         | 1                     |
| M1300I+1301 Tdel     | B55                   | MMC               | 80                         | 6.00                          | 1                     |
| M1300I+1301 Tdel     | B55                   | MMC               | 80                         | 5.00                          | 2                     |
| WT                   | B55                   | MMC               | 80                         | 16.00                         | 1                     |
| M1300I+1301 Tdel     | B55                   | Cisp              | 0.2                        | 73.00                         | 1                     |
| M1300I+1301 Tdel     | B55                   | Cisp              | 0.2                        | 71.00                         | 2                     |
| WT                   | B55                   | Cisp              | 0.2                        | 78.00                         | 1                     |
| M1300I+1301 Tdel     | B55                   | Cisp              | 0.4                        | 38.00                         | 1                     |
| M1300I+1301 Tdel     | B55                   | Cisp              | 0.4                        | 33.00                         | 2                     |
| WT                   | B55                   | Cisp              | 0.4                        | 67.00                         | 1                     |
| M1300I+1301 Tdel     | B55                   | Cisp              | 0.6                        | 16.00                         | 1                     |
| M1300I+1301 Tdel     | B55                   | Cisp              | 0.6                        | 19.00                         | 2                     |
| WT                   | B55                   | Cisp              | 0.6                        | 59.00                         | 1                     |
| M1300I+1301 Tdel     | B55                   | Cisp              | 1                          | 7.00                          | 1                     |
| M1300I+1301 Tdel     | B55                   | Cisp              | 1                          | 6.00                          | 2                     |
| WT                   | B55                   | Cisp              | 1                          | 45.00                         | 1                     |
| M1300I+1301 Tdel     | B55                   | Cisp              | 1.2                        | 5.00                          | 1                     |
| M1300I+1301 Tdel     | B55                   | Cisp              | 1.2                        | 5.00                          | 2                     |
| WT                   | B55                   | Cisp              | 1.2                        | 33.00                         | 1                     |
| M1300I+1301 Tdel     | B55                   | Cisp              | 1.5                        | 3.00                          | 1                     |
| M1300I+1301 Tdel     | B55                   | Cisp              | 1.5                        | 3.00                          | 2                     |



| Variant <sup>a</sup> | Batch ID <sup>b</sup> | Drug <sup>c</sup> | Concentration <sup>d</sup> | Percent Survived <sup>e</sup> | Clone ID <sup>f</sup> |
|----------------------|-----------------------|-------------------|----------------------------|-------------------------------|-----------------------|
| WT                   | B55                   | Cisp              | 1.5                        | 30.00                         | 1                     |
| M1300I+1301 Tdel     | B55                   | MMS               | 5                          | 100.00                        | 1                     |
| M1300I+1301 Tdel     | B55                   | MMS               | 5                          | 100.00                        | 2                     |
| WT                   | B55                   | MMS               | 5                          | 100.00                        | 1                     |
| M1300I+1301 Tdel     | B55                   | MMS               | 10                         | 100.00                        | 1                     |
| M1300I+1301 Tdel     | B55                   | MMS               | 10                         | 100.00                        | 2                     |
| WT                   | B55                   | MMS               | 10                         | 100.00                        | 1                     |
| M1300I+1301 Tdel     | B55                   | MMS               | 15                         | 100.00                        | 1                     |
| M1300I+1301 Tdel     | B55                   | MMS               | 15                         | 100.00                        | 2                     |
| WT                   | B55                   | MMS               | 15                         | 95.00                         | 1                     |
| M1300I+1301 Tdel     | B55                   | MMS               | 20                         | 71.00                         | 1                     |
| M1300I+1301 Tdel     | B55                   | MMS               | 20                         | 64.00                         | 2                     |
| WT                   | B55                   | MMS               | 20                         | 76.00                         | 1                     |
| M1300I+1301 Tdel     | B55                   | MMS               | 30                         | 17.00                         | 1                     |
| M1300I+1301 Tdel     | B55                   | MMS               | 30                         | 15.00                         | 2                     |
| WT                   | B55                   | MMS               | 30                         | 47.00                         | 1                     |
| M1300I+1301 Tdel     | B55                   | MMS               | 40                         | 7.00                          | 1                     |
| M1300I+1301 Tdel     | B55                   | MMS               | 40                         | 5.00                          | 2                     |
| WT                   | B55                   | MMS               | 40                         | 21.00                         | 1                     |
| M1300I+1301 Tdel     | B55                   | Parp              | 0.01                       | 100.00                        | 1                     |
| M1300I+1301 Tdel     | B55                   | Parp              | 0.01                       | 100.00                        | 2                     |
| WT                   | B55                   | Parp              | 0.01                       | 100.00                        | 1                     |
| M1300I+1301 Tdel     | B55                   | Parp              | 0.1                        | 100.00                        | 1                     |
| M1300I+1301 Tdel     | B55                   | Parp              | 0.1                        | 100.00                        | 2                     |
| WT                   | B55                   | Parp              | 0.1                        | 91.00                         | 1                     |
| M1300I+1301 Tdel     | B55                   | Parp              | 1                          | 61.00                         | 1                     |
| M1300I+1301 Tdel     | B55                   | Parp              | 1                          | 49.00                         | 2                     |
| WT                   | B55                   | Parp              | 1                          | 80.00                         | 1                     |
| M1300I+1301 Tdel     | B55                   | Parp              | 10                         | 4.00                          | 1                     |
| M1300I+1301 Tdel     | B55                   | Parp              | 10                         | 3.00                          | 2                     |
| WT                   | B55                   | Parp              | 10                         | 14.00                         | 1                     |

| Variant <sup>a</sup> | Batch ID <sup>b</sup> | Drug <sup>c</sup> | Concentration <sup>d</sup> | Percent Survived <sup>e</sup> | Clone ID <sup>f</sup> |
|----------------------|-----------------------|-------------------|----------------------------|-------------------------------|-----------------------|
| M1300I+1301 Tdel     | B55                   | IR                | 50                         | 100.00                        | 1                     |
| M1300I+1301 Tdel     | B55                   | IR                | 50                         | 1.45                          | 2                     |
| WT                   | B55                   | IR                | 50                         | 86.00                         | 1                     |
| M1300I+1301 Tdel     | B55                   | IR                | 100                        | 77.00                         | 1                     |
| M1300I+1301 Tdel     | B55                   | IR                | 100                        | 1.32                          | 2                     |
| WT                   | B55                   | IR                | 100                        | 62.00                         | 1                     |
| M1300I+1301 Tdel     | B55                   | IR                | 200                        | 42.00                         | 1                     |
| M1300I+1301 Tdel     | B55                   | IR                | 200                        | 1.46                          | 2                     |
| WT                   | B55                   | IR                | 200                        | 55.00                         | 1                     |
| M1300I+1301 Tdel     | B55                   | IR                | 400                        | 22.00                         | 1                     |
| M1300I+1301 Tdel     | B55                   | IR                | 400                        | 1.00                          | 2                     |
| WT                   | B55                   | IR                | 400                        | 17.00                         | 1                     |
| M1300I+1301 Tdel     | B55                   | IR                | 600                        | 17.00                         | 1                     |
| M1300I+1301 Tdel     | B55                   | IR                | 600                        | 1.00                          | 2                     |
| WT                   | B55                   | IR                | 600                        | 13.00                         | 1                     |
| N277K                | B57                   | Camp              | 2.5                        | 100.00                        | 1                     |
| N277K                | B57                   | Camp              | 2.5                        | 100.00                        | 2                     |
| WT                   | B57                   | Camp              | 2.5                        | 92.00                         | 1                     |
| N277K                | B57                   | Camp              | 5                          | 99.00                         | 1                     |
| N277K                | B57                   | Camp              | 5                          | 100.00                        | 2                     |
| WT                   | B57                   | Camp              | 5                          | 83.00                         | 1                     |
| N277K                | B57                   | Camp              | 25                         | 83.00                         | 1                     |
| N277K                | B57                   | Camp              | 25                         | 94.00                         | 2                     |
| WT                   | B57                   | Camp              | 25                         | 69.00                         | 1                     |
| N277K                | B57                   | Camp              | 50                         | 56.00                         | 1                     |
| N277K                | B57                   | Camp              | 50                         | 55.00                         | 2                     |
| WT                   | B57                   | Camp              | 50                         | 52.00                         | 1                     |
| N277K                | B57                   | Camp              | 100                        | 10.00                         | 1                     |
| N277K                | B57                   | Camp              | 100                        | 10.00                         | 2                     |
| WT                   | B57                   | Camp              | 100                        | 10.00                         | 1                     |
| N277K                | B57                   | Camp              | 200                        | 3.00                          | 1                     |
| N277K                | B57                   | Camp              | 200                        | 1.00                          | 2                     |
| WT                   | B57                   | Camp              | 200                        | 2.00                          | 1                     |
| N277K                | B57                   | MMC               | 5                          | 100.00                        | 1                     |
| N277K                | B57                   | MMC               | 5                          | 89.00                         | 2                     |
| WT                   | B57                   | MMC               | 5                          | 100.00                        | 1                     |

| Variant <sup>a</sup> | Batch ID <sup>b</sup> | Drug <sup>c</sup> | Concentration <sup>d</sup> | Percent Survived <sup>e</sup> | Clone ID <sup>f</sup> |
|----------------------|-----------------------|-------------------|----------------------------|-------------------------------|-----------------------|
| N277K                | B57                   | MMC               | 10                         | 95.00                         | 1                     |
| N277K                | B57                   | MMC               | 10                         | 98.00                         | 2                     |
| WT                   | B57                   | MMC               | 10                         | 100.00                        | 1                     |
| N277K                | B57                   | MMC               | 20                         | 82.00                         | 1                     |
| N277K                | B57                   | MMC               | 20                         | 78.00                         | 2                     |
| WT                   | B57                   | MMC               | 20                         | 89.00                         | 1                     |
| N277K                | B57                   | MMC               | 40                         | 37.00                         | 1                     |
| N277K                | B57                   | MMC               | 40                         | 31.00                         | 2                     |
| WT                   | B57                   | MMC               | 40                         | 51.00                         | 1                     |
| N277K                | B57                   | MMC               | 60                         | 13.00                         | 1                     |
| N277K                | B57                   | MMC               | 60                         | 11.00                         | 2                     |
| WT                   | B57                   | MMC               | 60                         | 37.00                         | 1                     |
| N277K                | B57                   | MMC               | 80                         | 5.00                          | 1                     |
| N277K                | B57                   | MMC               | 80                         | 7.00                          | 2                     |
| WT                   | B57                   | MMC               | 80                         | 19.00                         | 1                     |
| N277K                | B57                   | Cisp              | 0.2                        | 100.00                        | 1                     |
| N277K                | B57                   | Cisp              | 0.2                        | 77.00                         | 2                     |
| WT                   | B57                   | Cisp              | 0.2                        | 86.00                         | 1                     |
| N277K                | B57                   | Cisp              | 0.4                        | 60.00                         | 1                     |
| N277K                | B57                   | Cisp              | 0.4                        | 51.00                         | 2                     |
| WT                   | B57                   | Cisp              | 0.4                        | 70.00                         | 1                     |
| N277K                | B57                   | Cisp              | 0.6                        | 32.00                         | 1                     |
| N277K                | B57                   | Cisp              | 0.6                        | 27.00                         | 2                     |
| WT                   | B57                   | Cisp              | 0.6                        | 66.00                         | 1                     |
| N277K                | B57                   | Cisp              | 1                          | 10.00                         | 1                     |
| N277K                | B57                   | Cisp              | 1                          | 11.00                         | 2                     |
| WT                   | B57                   | Cisp              | 1                          | 37.00                         | 1                     |
| N277K                | B57                   | Cisp              | 1.2                        | 5.00                          | 1                     |
| N277K                | B57                   | Cisp              | 1.2                        | 6.00                          | 2                     |
| WT                   | B57                   | Cisp              | 1.2                        | 28.00                         | 1                     |
| N277K                | B57                   | Cisp              | 1.5                        | 4.00                          | 1                     |
| N277K                | B57                   | Cisp              | 1.5                        | 4.00                          | 2                     |
| WT                   | B57                   | Cisp              | 1.5                        | 24.00                         | 1                     |
| N277K                | B57                   | MMS               | 5                          | 90.00                         | 1                     |
| N277K                | B57                   | MMS               | 5                          | 92.00                         | 2                     |
| WT                   | B57                   | MMS               | 5                          | 93.00                         | 1                     |
| N277K                | B57                   | MMS               | 10                         | 88.00                         | 1                     |
| N277K                | B57                   | MMS               | 10                         | 79.00                         | 2                     |
| WT                   | B57                   | MMS               | 10                         | 91.00                         | 1                     |
| N277K                | B57                   | MMS               | 15                         | 70.00                         | 1                     |

| Variant <sup>a</sup> | Batch ID <sup>b</sup> | Drug <sup>c</sup> | Concentration <sup>d</sup> | Percent Survived <sup>e</sup> | Clone ID <sup>f</sup> |
|----------------------|-----------------------|-------------------|----------------------------|-------------------------------|-----------------------|
| N277K                | B57                   | MMS               | 15                         | 61.00                         | 2                     |
| WT                   | B57                   | MMS               | 15                         | 86.00                         | 1                     |
| N277K                | B57                   | MMS               | 20                         | 48.00                         | 1                     |
| N277K                | B57                   | MMS               | 20                         | 51.00                         | 2                     |
| WT                   | B57                   | MMS               | 20                         | 73.00                         | 1                     |
| N277K                | B57                   | MMS               | 30                         | 11.00                         | 1                     |
| N277K                | B57                   | MMS               | 30                         | 12.00                         | 2                     |
| WT                   | B57                   | MMS               | 30                         | 44.00                         | 1                     |
| N277K                | B57                   | MMS               | 40                         | 3.00                          | 1                     |
| N277K                | B57                   | MMS               | 40                         | 4.00                          | 2                     |
| WT                   | B57                   | MMS               | 40                         | 23.00                         | 1                     |
| N277K                | B57                   | Parp              | 0.01                       | 91.00                         | 1                     |
| N277K                | B57                   | Parp              | 0.01                       | 100.00                        | 2                     |
| WT                   | B57                   | Parp              | 0.01                       | 93.00                         | 1                     |
| N277K                | B57                   | Parp              | 0.1                        | 76.00                         | 1                     |
| N277K                | B57                   | Parp              | 0.1                        | 96.00                         | 2                     |
| WT                   | B57                   | Parp              | 0.1                        | 93.00                         | 1                     |
| N277K                | B57                   | Parp              | 1                          | 47.00                         | 1                     |
| N277K                | B57                   | Parp              | 1                          | 68.00                         | 2                     |
| WT                   | B57                   | Parp              | 1                          | 81.00                         | 1                     |
| N277K                | B57                   | Parp              | 10                         | 4.00                          | 1                     |
| N277K                | B57                   | Parp              | 10                         | 8.00                          | 2                     |
| WT                   | B57                   | Parp              | 10                         | 11.00                         | 1                     |
| N277K                | B57                   | IR                | 50                         | 87.00                         | 1                     |
| N277K                | B57                   | IR                | 50                         | 93.00                         | 2                     |
| WT                   | B57                   | IR                | 50                         | 88.00                         | 1                     |
| N277K                | B57                   | IR                | 100                        | 83.00                         | 1                     |
| N277K                | B57                   | IR                | 100                        | 77.00                         | 2                     |
| WT                   | B57                   | IR                | 100                        | 74.00                         | 1                     |
| N277K                | B57                   | IR                | 200                        | 69.00                         | 1                     |
| N277K                | B57                   | IR                | 200                        | 70.00                         | 2                     |
| WT                   | B57                   | IR                | 200                        | 63.00                         | 1                     |
| N277K                | B57                   | IR                | 400                        | 47.00                         | 1                     |
| N277K                | B57                   | IR                | 400                        | 37.00                         | 2                     |
| WT                   | B57                   | IR                | 400                        | 46.00                         | 1                     |
| N277K                | B57                   | IR                | 600                        | 42.00                         | 1                     |
| N277K                | B57                   | IR                | 600                        | 35.00                         | 2                     |
| WT                   | B57                   | IR                | 600                        | 43.00                         | 1                     |

<sup>a</sup>BRCA2 variant used in the drug sensitivity assay (DS)

<sup>b</sup>Batch number indicates samples analyzed in one set with common WT control

<sup>c</sup>DNA damaging agent used (Camp: camptothecin; MMC: mitomycin C; Cisp: Cisplatin; MMS: methyl methanesulfonate; Parp: PARP inhibitor olaparib; IR:  $\gamma$ -irradiation)

<sup>d</sup>Concentration used, Camp in  $\mu\text{M}$ ; MMC in  $\text{ng/ml}$ ; Cisp in  $\mu\text{M}$ ; MMS in  $\mu\text{g/ml}$ ; Parp in  $\mu\text{M}$ ; IR in RAD. NOTE: cells were treated in triplicate with each drug at each concentration/dose

<sup>e</sup>Percent Survived indicates cell survival relative to untreated cells.

<sup>f</sup>Clone ID refers to the two clones expressing the same variant

**Supplementary Table 4: List of PCR primers used in the study and their sequences and location.**

| Primers        | Sequence (5'-3')             | Used for alternative splicing analysis |
|----------------|------------------------------|----------------------------------------|
| Ex2-RT-Fwd     | GACACGCTGCAACAAAGCA          | V220Ifs                                |
| Ex10-RT-Rev    | CAGCGTTTGCTTCATGGA           | V220Ifs                                |
| BRCA2-11F      | TGGTTTTGTCAAATTCAAGAATTGG    | R2336L, R2336P                         |
| BRCA2-14R      | GTGAAAGTTACAGCTACTGCTTGATTGG | R2336L, R2336P                         |
| Exon 11-RT-Fwd | AACAGAAGCAGTAGAAATTGC        | G2281V, D2312V, D2312E                 |
| Exon 14 RT-Rev | AACAAAGACTTTGGTTGGTCTGCC     | G2281V, D2312V, D2312E                 |
| Exon 15-RT-Fwd | TGATGGTGGATGGCTCATACC        | R2659G, R2659K, R2659T, S2691F         |
| Exon 19 RT-Rev | GAATAATTACATCAACACAACC       | R2659G, R2659K, R2659T, S2691F         |
| ex15-Fwd-3     | AAGTTCCTCTGCGTGTTCT          | T2798Nfs                               |
| Ex20-Rev2      | GTCTCTTTTGTGGGCCTCCA         | T2798Nfs                               |
| Ex17-RT-Fwd    | AAGGAATTTGCTAATAGATGCC       | Q2829L, Q2829R, Q2829X                 |
| Ex22-RT-Rev    | ATTATTCAAGGCTCTTAACTGC       | Q2829L, Q2829R, Q2829X                 |
| Ex23-RT-For    | CATACAGTTAGCAGCGAC           | C3233Wfs                               |
| Ex27-RT-Rev    | CAACTCCTTGGTGGCTGAAA         | C3233Wfs                               |

## Supplemental Methods

### ImageJ Script for colony counting

Script #1, for getting threshold by clicking on the dimmest colony pre-selected by user

```
// ***** BEFORE RUNNING THE SCRIPT
*****
// Walls region of the petri dish should be filled with background color in ImageJ
// The background color should be picked from INSIDE of petri dish before processing:
// otherwise dark spot created by walls shadow will contribute to colonies count.
// The image window to work with needs to be renamed as "A" before running this script.
// Image should be zoomed in to see representative lowest intensity colony in high magnification.
// ***** USER ADJUSTABLE PARAMETERS
*****
// Two parameters below depend on the sample type and dpi settings of the scanner.
// Both need to be adjusted in "trial and error" mode for each dataset.
// Set the size of Gaussian filter for background subtraction.
// It should be bigger than any colony of interest
Blur_for_background = 200; // in pixels
// Set the size of the Gaussian filter to exclude very small spots merged together
Blur_for_small_separation_rejection = 2; // ~ to the minimal meaningful distance between two
colonies
//
*****
selectWindow("A");
// Rename window which will be used for clicking on "threshold" colony, remove XY
calibration.
rename("TO_CLICK");
run("Set Scale...", "distance=0 known=0 pixel=1 unit=pixel");
// Create a copy and converting it into a stack with 3 RGB colors separated
run("Duplicate...", "title=ABCDEFGH duplicate");
run("Split Channels");
run("Images to Stack", "name=Stack_R_G_B title=ABCDEFGH use");
run("Grays");
// Slices are arranged in RGB order, so the first slice will be "red". Blue dye absorbs red most,
// so that we use red for finding peaks. For different samples, another color may work better
setSlice(1); // red
// Original A image does not exist anymore, just reusing name
run("Duplicate...", "title=A");
// To find peaks, while colonies are actually dips in intensity, we need to flip black and white
run("Invert");
// Create window with approximation of background, and subtract it from the original image
run("Duplicate...", "title=Gauss");
run("Gaussian Blur...", "sigma=Blur_for_background");
imageCalculator("Subtract create", "A","Gauss");
```

```

// Blur background-free image so that very small features will not stand out
selectWindow("Result of A");
run("Gaussian Blur...", "sigma=Blur_for_small_separation_rejection");
rename("Image_A_filtered");
close("Gauss");
// Bring up original image zoomed out on the dimmest colony that counts, pre-selected to
represent threshold level
selectWindow("TO_CLICK");
showMessage("Press OK and then click TO_CLICK image exactly at center the dimmest peak
which still counts");
// Get user input. Variable x and y will contain coordinates of the first click.
leftButton=16;
getCursorLoc(x, y, z, flags);
while (flags&leftButton==0) {
    getCursorLoc(x, y, z, flags);
    wait(10); }
close();
// Recovering gray value from filtered gray image, which will be processed. Correcting for user's
1 pixel clicking error.
selectWindow("Image_A_filtered");
answer = getPixel(x, y); // Value of the clicked pixel. Will be compared to 8 nearest neighbors.
answer = maxOf(answer,getPixel(x+1, y+1));
answer = maxOf(answer,getPixel(x+1, y ));
answer = maxOf(answer,getPixel(x+1, y-1));
answer = maxOf(answer,getPixel(x , y+1));
answer = maxOf(answer,getPixel(x , y-1));
answer = maxOf(answer,getPixel(x-1, y+1));
answer = maxOf(answer,getPixel(x-1, y ));
answer = maxOf(answer,getPixel(x-1, y-1));
answer = answer -1; // to get the peak we clicked in
showMessage("The value used for thresholding is " + answer);
// Deleting everything below threshold. Because of integer type, all negative values are zeros.
run("Subtract...", "value=" + answer);
// Using "Find Maxima" build in ImageJ function, and creating a copy for printing
run("Find Maxima...", "noise=0 output=[Single Points]");
rename("To_count");
run("Duplicate...", "title=Maxima");
// Counting white pixels on BW image: the result will be an "Integrated Intensity"
selectWindow("To_count");
run("Divide...", "value=255");
run("Set Measurements...", " integrated redirect=None decimal=0");
run("Measure");
selectWindow("Maxima");
run("Grays");
// Clean up
close("To_count"); close("Image_A_filtered"); close("A");

```



```

// Printing square around the colony used as a reference for finding minimal intensity.
selectWindow("Stack_R_G_B");
run("8-bit");
setSlice(1);
setForegroundColor(255, 255, 255);
setLineWidth(2);
drawRect(x-15, y-15, 30, 30);
// Prining dots in each channel, to show colonies which has been counted
imageCalculator("Subtract", "Stack_R_G_B" , "Maxima");
setSlice(2); // for green
imageCalculator("Add", "Stack_R_G_B" , "Maxima");
setSlice(3); // for blue
imageCalculator("Subtract", "Stack_R_G_B" , "Maxima");
run("Stack to RGB");
// Presenting final result, the number of colonies in the window name
title_string = "Number_of_peaks_" + getResultString("RawIntDen") +
"_when_processed_with_" + answer + "_at_cell_";
rename(title_string);
// Clean up
selectWindow("Results"); run("Close");
close("Maxima"); close("Stack_R_G_B");

```

Script # 2, for using threshold found by script # 1 on a different image

```

// This is the script to be used for all images of a dataset except the one processed with the script
#1.
// The threshold intensity produced by script #1, and representing the dimmest colony to be
counted, needs to be
// manually entered each time.
// Make sure that two parameters below are same as in script #1 version used.
Blur_for_background = 200;
Blur_for_small_separation_rejection = 2;
// *****
selectWindow("A");
rename("ABCDEFGH ");
run("Set Scale...", "distance=0 known=0 pixel=1 unit=pixel");
run("Split Channels");
run("Images to Stack", "name=Stack_R_G_B title=ABCDEFGH use");
run("Grays");
setSlice(1);
run("Duplicate...", "title=A");
run("Invert");
run("Duplicate...", "title=Gauss");
run("Gaussian Blur...", "sigma=Blur_for_background");
imageCalculator("Subtract create", "A","Gauss");
selectWindow("Result of A");

```

```

run("Gaussian Blur...", "sigma=Blur_for_small_separation_rejection");
rename("Image_A_filtered");
close("Gauss");
// Ask user for threshold value
answer = getNumber("Please enter the number obtained from clicking on a spot", 100000);
// Proceed the same was as in script #1
run("Subtract...", "value=" + answer);
run("Find Maxima...", "noise=0 output=[Single Points]");
rename("To_count");
run("Duplicate...", "title=Maxima");
selectWindow("To_count");
run("Divide...", "value=255");
run("Set Measurements...", "integrated redirect=None decimal=0");
run("Measure");
selectWindow("Maxima");
run("Grays");
close("To_count");
close("Image_A_filtered");
close("A");
selectWindow("Stack_R_G_B");
run("8-bit");
imageCalculator("Subtract", "Stack_R_G_B", "Maxima");
setSlice(2); // for green
imageCalculator("Add", "Stack_R_G_B", "Maxima");
setSlice(3); // for blue
imageCalculator("Subtract", "Stack_R_G_B", "Maxima");
run("Stack to RGB");
title_string = "Number_of_peaks_" + getResultString("RawIntDen") +
"_when_processed_with_" + answer + "_at_cell_";
rename(title_string);
selectWindow("Results");
run("Close");
close("Maxima");
close("Stack_R_G_B");

```
